# Supplementary material for: A Simulated Shift Work Schedule Does Not Increase DNA Double-Strand Break Repair by NHEJ in the Drosophila Rr3 System
Source: MDPI journal article supplement (doi:10.3390/genes13010150), 2022-01-15
Supplement: s1 [file s1]

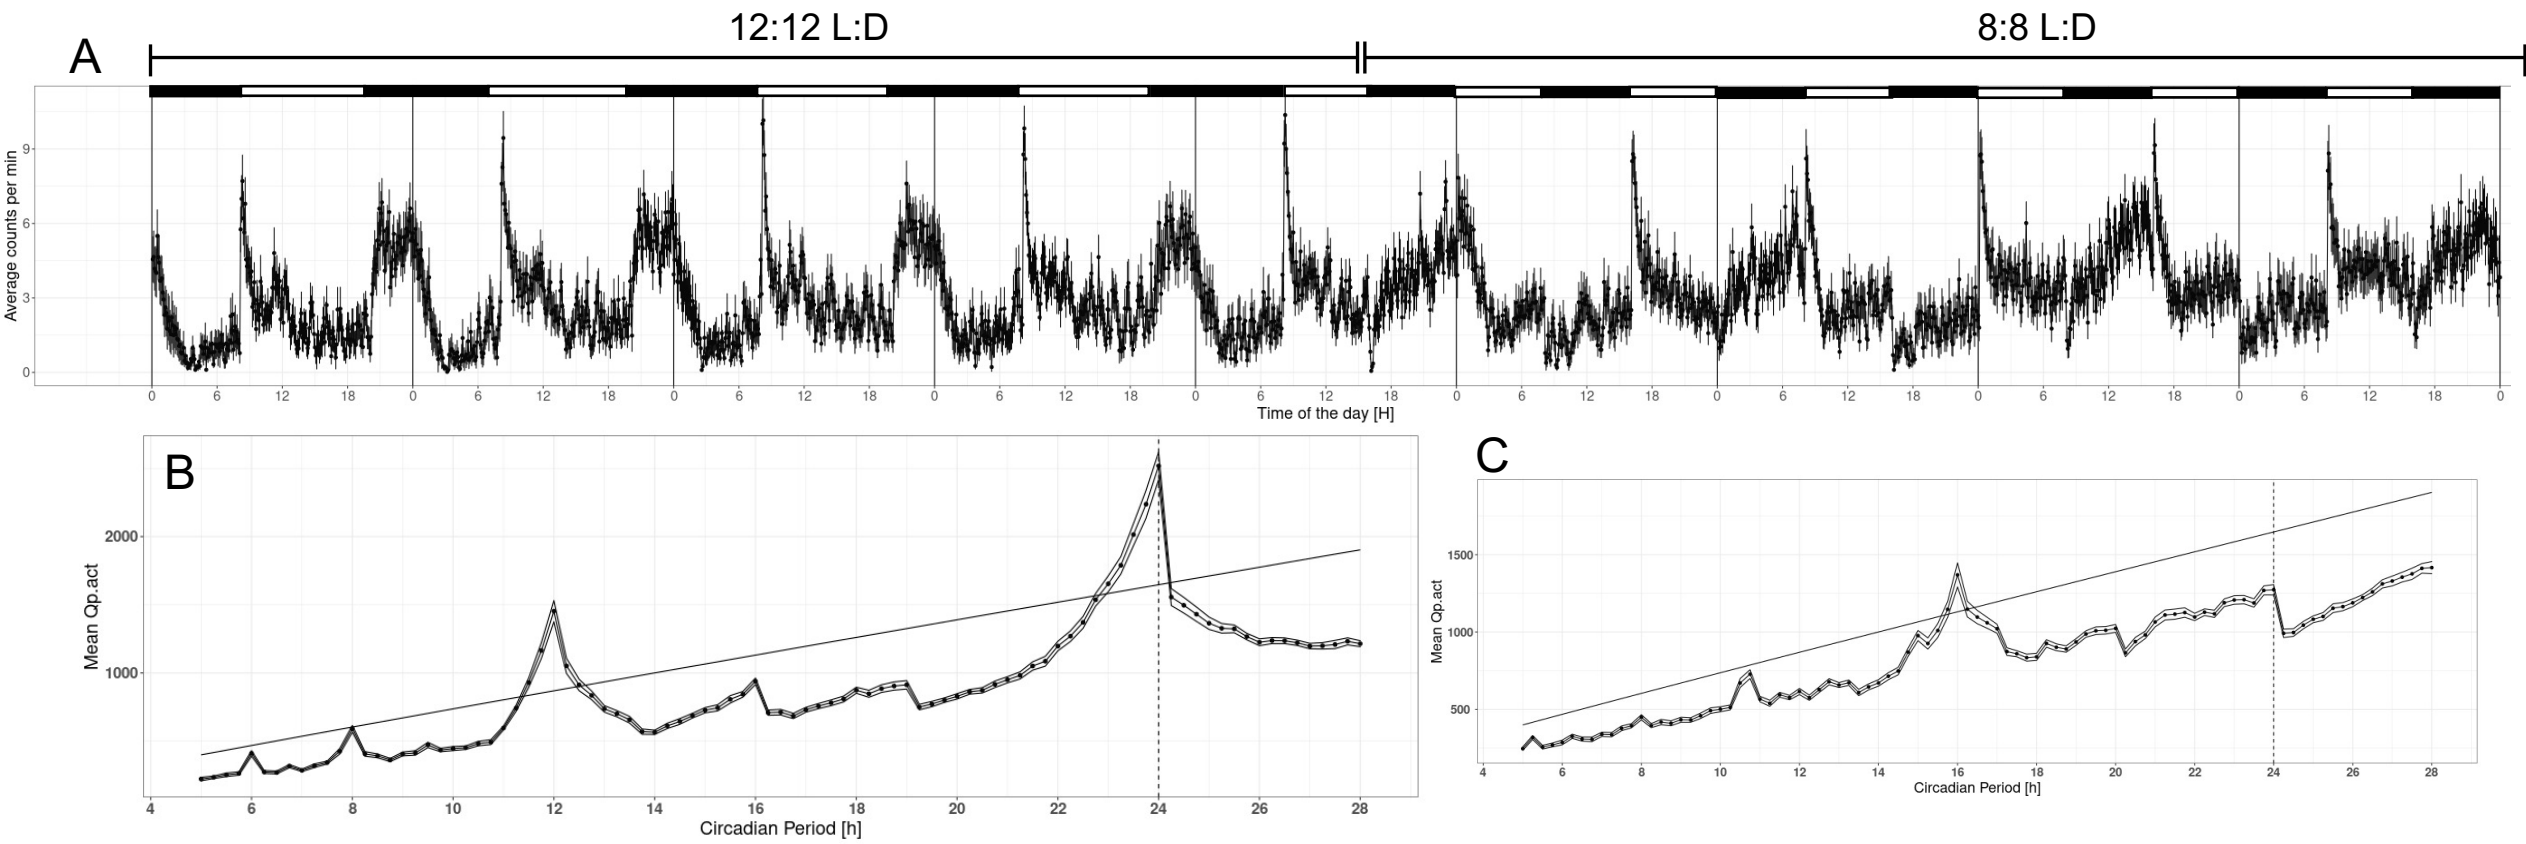

**Figure S1.** Actimetric analysis of *P{UIE}* flies (n=32). (a) Flies show the expected bimodal activity peaks under 12:12 L:D conditions, which is degraded when flies are shifted to an 8:8 L:D schedule. (b) Chi-square periodogram of 12:12 L:D activity data shows a peak at a 24 hour period, consistent with normal circadian rhythmicity. (c) Chi-square periodogram of 8:8 L:D activity data shows altered periodicity of locomotor activity rhythms. The data file used to generate these figures is available as Table S1.
