# Supplementary material for: A Simulated Shift Work Schedule Does Not Increase DNA Double-Strand Break Repair by NHEJ in the Drosophila Rr3 System
Source: Genes (Basel). 2022 Jan 15;13(1):150. doi: 10.3390/genes13010150 (PMC8774994; doi:10.3390/genes13010150)
Supplement: Supplementary file 1 [file genes-13-00150-s001.zip]

Archive with 6 entries (6 files):
- Figure S1.pdf
- Figure S2.pdf
- Table S1.csv
- Table S2.csv
- Table S3.xlsx
- Table S4.xlsx
