# Supplementary material for: A Simulated Shift Work Schedule Does Not Increase DNA Double-Strand Break Repair by NHEJ in the Drosophila Rr3 System
Source: Genes (Basel). 2022 Jan 15;13(1):150. doi: 10.3390/genes13010150 (PMC8774994; doi:10.3390/genes13010150)
Supplement: Supplementary file 1 [file genes-13-00150-s001.zip › Table S1.csv]

697	27-Dec-21	0:00:00	1	0	1	0	CT	0	0	0	0	23	18	40	0	1	0	0	17	25	0	49	0	17	32	0	57	71	0	13	49	0	31	11	21	35	78	44	0	0	28
698	27-Dec-21	0:05:00	1	0	1	0	CT	0	0	0	0	51	0	58	0	0	0	0	3	45	0	51	0	51	36	0	28	100	0	0	25	0	20	15	62	52	28	54	8	0	10
699	27-Dec-21	0:10:00	1	0	1	0	CT	0	0	0	0	46	0	63	0	14	0	0	0	45	0	34	0	30	36	0	54	54	0	1	53	0	11	67	42	42	7	42	0	1	19
700	27-Dec-21	0:15:00	1	0	1	0	CT	0	0	0	0	67	0	74	0	0	5	0	0	43	0	38	0	48	19	0	45	83	63	11	20	0	0	63	0	15	22	32	0	13	0
701	27-Dec-21	0:20:00	1	0	1	0	CT	0	0	0	0	46	0	47	0	5	3	13	15	37	0	31	0	70	47	0	38	86	0	25	33	0	0	0	83	0	35	2	0	1	9
702	27-Dec-21	0:25:00	1	0	1	0	CT	0	0	0	0	56	0	82	0	0	0	20	1	33	0	47	51	49	15	0	49	82	0	60	26	0	0	1	50	48	38	59	0	0	26
703	27-Dec-21	0:30:00	1	0	1	0	CT	0	0	37	0	38	0	57	0	0	6	20	0	29	0	53	0	27	3	0	38	73	0	47	78	0	0	2	30	32	27	35	0	0	24
704	27-Dec-21	0:35:00	1	0	1	0	CT	0	0	39	0	47	0	66	0	0	0	6	1	14	0	35	0	17	65	0	59	93	0	0	11	0	38	0	81	0	0	3	0	8	31
705	27-Dec-21	0:40:00	1	0	1	0	CT	0	0	0	0	48	0	63	0	0	2	0	8	50	0	56	0	69	43	0	49	73	0	0	5	0	21	0	48	0	4	0	0	12	24
706	27-Dec-21	0:45:00	1	0	1	0	CT	0	0	0	0	46	0	74	0	8	14	0	6	38	0	28	0	51	1	0	52	93	3	2	1	0	31	9	62	0	0	0	15	1	31
707	27-Dec-21	0:50:00	1	0	1	0	CT	0	0	2	0	53	0	49	0	12	8	0	0	50	0	41	0	29	3	0	34	75	59	25	0	0	14	63	50	0	11	0	0	0	25
708	27-Dec-21	0:55:00	1	0	1	0	CT	0	0	0	0	31	0	77	29	0	0	1	0	27	0	37	0	52	11	0	54	74	0	1	0	0	0	0	67	1	0	0	15	0	10
709	27-Dec-21	1:00:00	1	0	1	0	CT	0	0	0	0	57	0	68	3	0	0	1	0	32	0	0	0	16	1	0	48	94	1	0	2	0	0	0	0	0	0	0	55	0	34
710	27-Dec-21	1:05:00	1	0	1	0	CT	0	0	0	0	45	0	71	0	0	0	5	0	4	0	2	0	0	3	0	44	82	0	1	1	0	0	1	0	0	0	0	0	19	35
711	27-Dec-21	1:10:00	1	0	1	0	CT	0	0	0	0	50	0	47	0	0	15	0	0	22	0	2	0	0	63	0	54	69	0	0	13	0	0	0	0	0	0	0	0	0	19
712	27-Dec-21	1:15:00	1	0	1	0	CT	0	0	0	0	29	0	70	1	0	29	0	0	2	0	0	0	1	0	0	27	88	0	63	3	0	0	1	0	0	0	0	0	0	10
713	27-Dec-21	1:20:00	1	0	1	0	CT	0	0	0	0	44	0	61	0	0	0	0	0	1	0	0	0	5	0	0	51	77	1	0	1	0	0	0	0	0	0	0	0	0	1
714	27-Dec-21	1:25:00	1	0	1	0	CT	0	0	0	0	32	0	73	0	0	5	1	0	0	0	0	0	0	0	0	54	94	0	0	0	0	0	2	0	0	0	0	1	25	16
715	27-Dec-21	1:30:00	1	0	1	0	CT	0	0	0	0	43	0	74	1	0	0	0	0	2	0	0	0	0	0	0	49	101	0	0	0	0	0	3	0	0	0	0	0	0	12
716	27-Dec-21	1:35:00	1	0	1	0	CT	0	0	0	0	6	0	45	0	0	0	0	0	0	0	0	0	0	0	0	52	97	0	0	0	0	0	0	0	2	1	0	0	5	16
717	27-Dec-21	1:40:00	1	0	1	0	CT	0	0	0	0	0	0	48	63	0	0	1	0	0	0	0	0	0	0	0	10	81	0	0	1	0	0	0	0	0	0	0	1	2	0
718	27-Dec-21	1:45:00	1	0	1	0	CT	0	0	0	0	1	0	83	0	0	0	0	0	15	1	0	0	0	3	0	55	105	0	0	0	0	0	0	0	0	0	0	0	0	36
719	27-Dec-21	1:50:00	1	0	1	0	CT	0	0	0	0	1	0	71	1	0	1	0	0	8	0	0	0	0	0	0	38	113	0	0	0	0	0	7	0	1	2	10	0	0	10
720	27-Dec-21	1:55:00	1	0	1	0	CT	0	0	0	0	0	0	91	0	0	2	0	0	5	0	0	0	0	0	0	0	83	0	0	0	0	0	0	0	0	1	21	0	0	0
721	27-Dec-21	2:00:00	1	0	1	0	CT	0	0	0	0	1	0	75	0	0	0	0	0	6	0	0	23	0	11	0	0	89	0	0	1	0	0	0	0	0	1	26	0	13	3
722	27-Dec-21	2:05:00	1	0	1	0	CT	0	0	0	0	2	0	76	1	0	0	0	0	6	7	0	0	0	0	0	0	60	0	0	0	0	0	0	0	0	0	54	0	0	0
723	27-Dec-21	2:10:00	1	0	1	0	CT	0	0	0	0	0	0	71	4	1	0	0	0	1	12	0	0	0	9	0	0	86	0	3	0	0	0	0	0	1	0	50	0	0	0
724	27-Dec-21	2:15:00	1	0	1	0	CT	0	0	0	0	0	0	46	0	0	0	1	0	0	0	0	0	0	0	0	0	75	0	7	5	0	0	0	0	11	3	35	0	0	0
725	27-Dec-21	2:20:00	1	0	1	0	CT	0	0	0	0	0	0	29	0	0	1	2	0	1	3	0	0	0	2	0	0	72	0	0	4	0	0	0	0	0	0	63	0	0	0
726	27-Dec-21	2:25:00	1	0	1	0	CT	0	0	0	0	1	0	16	0	0	1	0	0	5	20	0	0	0	11	0	0	81	0	0	2	0	0	0	0	0	0	0	2	0	5
727	27-Dec-21	2:30:00	1	0	1	0	CT	0	0	0	0	10	0	0	0	0	18	0	0	0	16	0	0	0	0	0	0	81	0	0	23	0	0	0	0	0	0	0	0	0	4
728	27-Dec-21	2:35:00	1	0	1	0	CT	0	0	0	0	0	0	25	0	1	4	0	0	0	0	0	1	0	0	0	0	59	0	0	19	0	0	1	0	0	0	0	0	0	0
729	27-Dec-21	2:40:00	1	0	1	0	CT	0	0	0	0	0	0	47	0	0	15	0	0	0	0	0	0	0	0	0	0	40	0	0	0	0	0	1	0	0	0	0	0	0	0
730	27-Dec-21	2:45:00	1	0	1	0	CT	0	0	0	0	0	0	17	0	0	0	19	0	0	0	0	0	0	7	0	0	62	0	0	0	0	0	0	0	0	0	0	0	0	0
731	27-Dec-21	2:50:00	1	0	1	0	CT	0	0	0	0	0	0	0	0	0	0	63	0	0	0	0	1	0	0	0	0	68	0	0	0	0	0	0	0	2	0	0	0	0	0
732	27-Dec-21	2:55:00	1	0	1	0	CT	0	0	0	0	0	5	0	0	0	0	0	0	0	0	0	0	0	0	0	0	7	30	0	11	0	0	0	0	0	0	0	0	9	0
733	27-Dec-21	3:00:00	1	0	1	0	CT	0	0	21	0	0	5	0	0	0	0	0	5	0	0	0	2	0	0	0	0	0	41	0	18	0	0	0	0	0	0	3	0	0	0
734	27-Dec-21	3:05:00	1	0	1	0	CT	0	0	27	0	0	0	5	0	0	0	0	1	1	0	0	7	0	0	0	0	0	0	0	0	0	0	0	0	7	0	3	0	0	0
735	27-Dec-21	3:10:00	1	0	1	0	CT	0	0	3	0	0	0	1	0	0	0	0	2	0	0	0	0	0	0	0	4	0	0	0	0	0	0	0	0	3	0	42	0	0	0
736	27-Dec-21	3:15:00	1	0	1	0	CT	0	0	0	0	0	0	0	0	0	2	0	0	0	0	0	1	0	0	0	5	0	6	0	0	0	0	0	0	0	4	6	0	0	0
737	27-Dec-21	3:20:00	1	0	1	0	CT	0	0	1	0	0	0	0	0	0	0	12	0	0	0	0	0	0	0	0	0	0	6	0	0	0	0	0	0	13	0	2	4	0	0
738	27-Dec-21	3:25:00	1	0	1	0	CT	0	0	0	0	0	0	0	0	0	2	1	0	0	1	0	1	0	30	0	6	0	0	0	0	0	0	0	0	0	0	3	0	0	0
739	27-Dec-21	3:30:00	1	0	1	0	CT	0	0	1	0	4	60	0	0	0	1	0	0	0	0	0	0	0	0	0	2	0	0	0	0	0	0	0	0	5	0	0	0	0	0
740	27-Dec-21	3:35:00	1	0	1	0	CT	0	0	1	16	0	9	21	1	0	0	6	0	0	0	0	4	0	0	0	0	0	0	0	0	0	0	0	0	0	0	0	0	0	0
741	27-Dec-21	3:40:00	1	0	1	0	CT	0	0	2	11	0	0	38	51	0	0	0	0	0	0	0	21	0	2	0	8	0	1	0	0	0	0	0	0	0	0	0	0	0	0
742	27-Dec-21	3:45:00	1	0	1	0	CT	0	0	22	9	0	0	54	4	0	1	0	0	0	0	0	0	1	1	0	0	0	0	0	0	0	0	0	0	0	0	0	0	0	0
743	27-Dec-21	3:50:00	1	0	1	0	CT	0	0	0	1	0	0	61	3	0	4	3	0	0	0	0	0	0	0	0	0	0	0	0	0	0	0	0	0	0	0	0	0	0	0
744	27-Dec-21	3:55:00	1	0	1	0	CT	0	0	0	0	0	0	7	0	0	0	0	0	0	0	0	0	0	1	0	0	0	0	0	0	0	0	2	0	0	2	0	0	4	0
745	27-Dec-21	4:00:00	1	0	1	0	CT	0	0	0	0	0	2	0	5	0	6	0	0	0	0	0	0	1	11	0	0	0	0	0	0	0	0	7	0	0	7	0	0	0	0
746	27-Dec-21	4:05:00	1	0	1	0	CT	0	0	0	0	0	6	0	0	3	0	0	0	0	3	0	0	1	2	0	0	0	0	0	0	0	0	0	0	2	14	0	0	0	0
747	27-Dec-21	4:10:00	1	0	1	0	CT	0	0	0	0	0	0	0	0	7	3	0	0	0	0	0	0	1	1	0	0	0	0	0	0	0	0	0	0	19	0	0	0	0	0
748	27-Dec-21	4:15:00	1	0	1	0	CT	0	0	0	0	0	0	0	0	3	0	0	0	0	0	0	14	0	0	0	0	0	0	0	1	0	1	0	1	0	0	38	0	0	0
749	27-Dec-21	4:20:00	1	0	1	0	CT	0	0	0	0	0	2	0	0	0	1	2	0	0	0	0	0	1	0	0	0	0	0	0	2	0	0	0	8	1	0	18	0	0	0
750	27-Dec-21	4:25:00	1	0	1	0	CT	0	0	0	0	0	37	0	0	0	9	4	0	4	0	0	0	1	0	0	0	9	0	65	0	0	0	0	0	5	1	9	0	0	0
751	27-Dec-21	4:30:00	1	0	1	0	CT	0	0	0	0	0	13	0	0	2	0	5	29	9	2	40	0	0	9	0	0	0	0	8	1	0	0	0	0	0	0	48	0	0	0
752	27-Dec-21	4:35:00	1	0	1	0	CT	0	0	0	0	0	0	0	0	0	0	2	0	0	0	21	0	0	0	0	0	0	0	7	33	0	0	0	0	0	0	69	0	0	0
753	27-Dec-21	4:40:00	1	0	1	0	CT	0	0	0	0	0	0	0	0	3	0	1	0	0	0	22	0	1	0	0	0	0	0	2	0	0	0	0	1	1	0	58	0	12	0
754	27-Dec-21	4:45:00	1	0	1	0	CT	0	0	0	0	0	0	0	0	28	0	1	0	0	3	57	0	0	7	0	0	0	0	3	0	0	0	0	0	1	0	34	0	0	0
755	27-Dec-21	4:50:00	1	0	1	0	CT	0	0	2	0	0	0	0	0	1	0	0	0	0	28	0	0	7	0	0	0	0	0	95	0	0	0	0	0	6	1	35	0	0	0
756	27-Dec-21	4:55:00	1	0	1	0	CT	0	0	4	0	0	0	0	0	0	0	0	0	0	0	0	2	11	1	0	0	0	0	1	5	0	0	0	1	0	0	0	0	0	0
757	27-Dec-21	5:00:00	1	0	1	0	CT	0	0	0	0	0	0	0	0	1	0	1	0	0	0	0	43	0	0	0	10	0	2	0	35	0	0	0	39	1	0	0	0	0	2
758	27-Dec-21	5:05:00	1	0	1	0	CT	0	0	0	3	0	0	0	0	0	0	4	0	0	0	0	17	0	25	0	7	1	1	10	5	0	0	0	12	0	0	0	0	0	0
759	27-Dec-21	5:10:00	1	0	1	0	CT	0	0	0	0	0	0	1	23	0	0	5	0	0	0	0	34	0	13	0	0	0	25	0	0	0	0	0	10	0	1	1	0	0	10
760	27-Dec-21	5:15:00	1	0	1	0	CT	0	0	1	0	0	0	0	11	1	0	0	0	0	6	0	9	0	0	0	0	8	1	1	0	0	0	0	9	19	0	40	0	0	0
761	27-Dec-21	5:20:00	1	0	1	0	CT	0	0	0	0	0	0	0	29	5	0	0	0	0	6	0	0	0	0	0	0	0	57	0	0	0	0	0	0	35	0	13	0	6	0
762	27-Dec-21	5:25:00	1	0	1	0	CT	0	0	2	32	55	0	1	0	30	1	3	0	0	0	0	0	0	0	0	0	0	0	4	1	0	0	0	0	1	2	25	0	0	0
763	27-Dec-21	5:30:00	1	0	1	0	CT	0	0	0	1	0	0	10	16	0	0	43	0	0	0	0	2	3	0	0	1	0	0	11	3	0	0	0	7	13	0	0	0	0	1
764	27-Dec-21	5:35:00	1	0	1	0	CT	0	0	2	0	0	0	9	15	0	0	0	0	0	0	0	9	0	0	0	0	0	0	5	3	0	0	0	0	0	0	0	0	0	1
765	27-Dec-21	5:40:00	1	0	1	0	CT	0	0	0	0	0	22	0	0	0	0	0	0	0	2	0	0	4	0	0	0	79	0	5	3	0	0	0	0	0	0	0	0	0	0
766	27-Dec-21	5:45:00	1	0	1	0	CT	0	0	0	13	0	40	0	0	0	0	0	0	0	0	0	1	10	1	0	0	71	0	17	7	0	0	0	0	0	0	0	0	3	0
767	27-Dec-21	5:50:00	1	0	1	0	CT	0	0	0	0	0	50	1	0	0	0	0	0	0	0	0	4	0	2	0	2	59	0	2	20	0	0	11	0	1	0	0	0	9	0
768	27-Dec-21	5:55:00	1	0	1	0	CT	0	0	0	4	0	28	6	0	6	0	6	0	0	2	0	1	21	1	0	12	45	0	2	14	0	0	0	0	5	6	0	0	0	0
769	27-Dec-21	6:00:00	1	0	1	0	CT	0	0	1	0	0	0	0	0	0	0	2	0	0	2	0	0	11	0	0	0	99	0	5	0	0	0	0	1	11	11	0	0	0	2
770	27-Dec-21	6:05:00	1	0	1	0	CT	0	0	4	0	0	1	0	0	0	0	0	0	0	14	4	0	0	0	0	0	69	0	15	0	0	0	0	0	0	21	0	0	0	25
771	27-Dec-21	6:10:00	1	0	1	0	CT	0	0	6	0	0	0	0	0	0	0	0	0	0	0	1	15	0	1	0	0	87	0	0	0	0	0	0	4	0	0	0	0	0	0
772	27-Dec-21	6:15:00	1	0	1	0	CT	0	0	21	46	1	0	0	0	0	9	0	0	0	0	1	45	0	1	0	0	20	0	0	0	0	0	0	12	0	2	0	0	0	0
773	27-Dec-21	6:20:00	1	0	1	0	CT	0	0	22	66	1	1	7	12	2	3	0	0	0	0	0	0	4	0	0	0	26	0	0	0	0	0	0	0	63	0	0	0	0	2
774	27-Dec-21	6:25:00	1	0	1	0	CT	0	0	8	37	0	0	0	0	0	6	9	0	10	0	0	0	10	0	0	0	53	0	0	0	0	0	0	0	1	0	13	0	0	0
775	27-Dec-21	6:30:00	1	0	1	0	CT	0	0	0	11	0	0	0	0	42	13	0	0	0	0	0	5	1	5	0	0	34	0	0	1	0	0	0	1	0	0	39	0	0	1
776	27-Dec-21	6:35:00	1	0	1	0	CT	0	0	0	2	0	0	0	1	0	44	0	0	0	0	1	0	1	0	0	0	17	0	0	0	0	0	0	2	0	0	0	0	0	0
777	27-Dec-21	6:40:00	1	0	1	0	CT	0	0	0	0	0	0	0	0	1	28	0	0	0	0	0	2	2	0	0	18	0	0	0	0	0	0	0	2	0	4	0	0	0	0
778	27-Dec-21	6:45:00	1	0	1	0	CT	0	0	0	6	0	0	1	0	0	0	0	0	0	0	4	0	28	0	0	83	0	0	58	0	0	0	0	0	0	0	0	0	0	5
779	27-Dec-21	6:50:00	1	0	1	0	CT	0	0	0	1	0	0	0	0	1	0	0	0	0	0	0	0	0	0	0	12	0	0	63	13	0	0	0	0	0	0	0	0	0	36
780	27-Dec-21	6:55:00	1	0	1	0	CT	0	0	0	1	1	1	0	21	0	1	0	0	0	0	0	2	0	0	0	0	0	8	2	53	0	0	0	36	0	0	0	0	14	9
781	27-Dec-21	7:00:00	1	0	1	0	CT	0	0	8	0	3	40	8	21	0	0	0	3	0	0	0	7	12	0	0	0	0	0	5	0	0	0	0	1	0	0	6	0	19	0
782	27-Dec-21	7:05:00	1	0	1	0	CT	0	0	23	0	0	45	31	9	13	1	0	0	0	5	0	0	1	0	0	2	28	0	15	0	0	0	1	0	0	0	3	0	0	0
783	27-Dec-21	7:10:00	1	0	1	0	CT	0	0	63	0	30	51	0	22	4	48	0	0	0	4	0	2	1	16	0	0	2	0	49	0	0	0	0	0	6	0	9	0	0	0
784	27-Dec-21	7:15:00	1	0	1	0	CT	0	0	8	0	0	0	0	29	0	0	0	0	17	29	0	5	0	9	0	0	15	3	0	1	0	0	0	5	0	0	39	0	0	0
785	27-Dec-21	7:20:00	1	0	1	0	CT	0	0	1	0	0	0	0	6	0	6	0	0	0	21	0	15	1	20	0	62	2	1	0	86	0	0	0	19	0	15	61	0	0	0
786	27-Dec-21	7:25:00	1	0	1	0	CT	0	0	10	0	1	0	5	5	5	0	0	0	0	3	0	0	2	2	0	0	0	1	0	7	0	0	0	0	44	0	40	0	0	0
787	27-Dec-21	7:30:00	1	0	1	0	CT	0	0	0	0	60	0	5	0	0	14	0	1	0	0	0	1	0	0	0	12	0	0	8	20	0	0	0	0	11	13	83	0	0	0
788	27-Dec-21	7:35:00	1	0	1	0	CT	0	0	0	0	21	0	4	0	1	12	0	0	0	0	0	1	0	0	0	0	1	15	70	2	0	0	0	0	0	20	95	0	5	3
789	27-Dec-21	7:40:00	1	0	1	0	CT	0	0	0	0	0	0	0	0	0	0	0	1	0	0	13	9	0	0	0	0	5	0	0	2	0	0	95	0	21	53	56	3	4	0
790	27-Dec-21	7:45:00	1	0	1	0	CT	0	0	0	0	0	0	0	5	4	0	0	5	0	0	25	0	0	50	0	0	0	18	0	1	0	0	88	0	34	0	75	1	0	8
791	27-Dec-21	7:50:00	1	0	1	0	CT	0	0	43	0	0	0	0	23	1	23	0	0	0	0	0	1	0	37	0	0	0	12	0	0	0	0	67	0	16	0	16	0	0	5
792	27-Dec-21	7:55:00	1	0	1	0	CT	0	0	0	0	0	5	0	2	0	29	0	8	0	0	0	26	0	36	0	0	0	0	0	2	0	0	50	0	27	0	29	0	0	1
793	27-Dec-21	8:00:00	1	0	1	0	CT	0	0	0	0	0	0	0	2	0	1	0	0	0	0	0	0	7	42	0	0	0	0	0	0	0	0	38	0	28	0	3	0	0	29
794	27-Dec-21	8:05:00	1	0	1	0	CT	0	1	0	78	5	44	5	25	54	21	7	19	0	0	35	55	70	53	0	35	2	22	52	20	0	37	102	40	84	43	0	25	12	24
795	27-Dec-21	8:10:00	1	0	1	0	CT	0	1	44	32	1	28	59	22	52	46	0	68	14	0	66	64	70	46	0	77	49	42	49	27	0	3	72	53	71	55	0	8	0	36
796	27-Dec-21	8:15:00	1	0	1	0	CT	0	1	1	14	10	65	95	10	41	52	32	43	20	0	72	34	65	53	0	71	80	67	24	30	0	38	2	52	75	37	0	10	11	47
797	27-Dec-21	8:20:00	1	0	1	0	CT	0	1	0	45	9	29	106	13	12	75	0	54	22	0	55	68	72	20	0	56	57	54	0	14	0	0	0	52	51	40	2	19	2	37
798	27-Dec-21	8:25:00	1	0	1	0	CT	0	1	9	2	30	22	73	29	16	11	0	42	0	0	53	30	35	56	0	33	55	64	9	30	0	39	0	19	103	35	0	27	5	11
799	27-Dec-21	8:30:00	1	0	1	0	CT	0	1	1	4	77	54	71	17	17	20	30	32	0	0	68	62	65	31	0	37	59	48	14	82	0	32	0	33	83	27	0	46	4	0
800	27-Dec-21	8:35:00	1	0	1	0	CT	0	1	7	15	53	0	48	0	1	0	63	36	34	0	40	10	36	23	0	37	82	28	5	12	0	0	0	47	56	50	0	0	0	3
801	27-Dec-21	8:40:00	1	0	1	0	CT	0	1	13	13	58	0	43	19	5	0	4	31	59	0	50	17	11	33	0	72	56	44	0	3	0	0	0	27	26	35	0	0	0	0
802	27-Dec-21	8:45:00	1	0	1	0	CT	0	1	1	19	10	30	37	11	22	0	0	27	61	0	44	23	9	22	0	19	49	63	27	1	0	13	26	31	99	33	3	0	0	0
803	27-Dec-21	8:50:00	1	0	1	0	CT	0	1	0	0	54	7	40	31	33	0	0	39	56	0	11	28	1	26	0	23	53	37	14	35	0	11	74	32	55	17	12	0	0	0
804	27-Dec-21	8:55:00	1	0	1	0	CT	0	1	5	6	47	32	49	49	3	1	0	20	13	0	0	17	0	63	0	11	38	22	17	6	0	0	52	61	71	23	7	0	0	0
805	27-Dec-21	9:00:00	1	0	1	0	CT	0	1	2	46	60	13	34	3	0	13	0	31	0	0	0	47	23	17	0	1	25	19	0	63	0	2	10	52	41	28	24	0	0	30
806	27-Dec-21	9:05:00	1	0	1	0	CT	0	1	71	11	57	2	2	7	0	31	0	37	0	0	0	28	32	13	0	0	65	44	0	55	0	0	46	0	76	45	0	11	0	31
807	27-Dec-21	9:10:00	1	0	1	0	CT	0	1	2	0	44	4	0	0	0	2	0	19	1	0	0	24	40	12	0	41	89	37	0	8	0	8	26	0	35	34	0	0	0	15
808	27-Dec-21	9:15:00	1	0	1	0	CT	0	1	0	18	42	11	0	26	0	13	0	12	0	0	0	25	47	17	0	57	55	21	10	7	0	0	20	2	40	30	0	0	0	0
809	27-Dec-21	9:20:00	1	0	1	0	CT	0	1	8	28	56	1	0	10	0	34	19	13	0	26	0	16	0	16	0	46	58	37	24	4	0	0	0	0	32	70	0	0	5	0
810	27-Dec-21	9:25:00	1	0	1	0	CT	0	1	0	7	19	28	0	9	0	46	32	22	0	4	0	24	0	21	0	5	15	42	0	9	0	4	0	0	31	36	0	0	0	0
811	27-Dec-21	9:30:00	1	0	1	0	CT	0	1	8	0	1	0	0	5	0	38	0	12	0	37	2	15	0	15	0	0	0	31	0	8	0	8	0	0	38	28	0	0	0	2
812	27-Dec-21	9:35:00	1	0	1	0	CT	0	1	0	0	45	23	0	14	0	0	0	15	0	16	0	25	0	80	0	0	1	22	0	65	0	28	0	0	31	27	10	0	3	3
813	27-Dec-21	9:40:00	1	0	1	0	CT	0	1	0	0	45	10	0	27	0	0	0	3	28	0	0	61	16	32	0	0	11	31	0	0	0	41	0	10	27	45	0	0	4	0
814	27-Dec-21	9:45:00	1	0	1	0	CT	0	1	0	0	49	36	0	15	0	9	0	8	13	4	0	11	0	37	0	1	0	26	0	0	0	0	1	21	58	4	0	0	0	0
815	27-Dec-21	9:50:00	1	0	1	0	CT	0	1	0	0	36	1	0	20	0	0	0	25	1	0	0	16	0	12	0	26	0	38	0	4	0	0	50	88	33	13	27	0	0	0
816	27-Dec-21	9:55:00	1	0	1	0	CT	0	1	63	0	49	10	0	10	0	0	0	10	4	1	3	19	0	67	0	93	0	56	0	12	0	0	33	0	38	0	64	5	0	0
817	27-Dec-21	10:00:00	1	0	1	0	CT	0	1	30	0	46	12	0	14	2	0	0	16	3	65	0	33	0	17	0	26	0	19	0	0	0	0	1	45	30	0	70	0	0	0
818	27-Dec-21	10:05:00	1	0	1	0	CT	0	1	0	0	1	31	0	11	32	0	0	3	26	59	8	18	0	24	0	20	0	56	0	19	0	0	0	2	42	0	32	0	0	0
819	27-Dec-21	10:10:00	1	0	1	0	CT	0	1	1	0	0	1	0	22	10	0	9	0	1	14	0	21	0	14	0	12	0	15	27	23	0	0	0	7	22	15	2	0	18	25
820	27-Dec-21	10:15:00	1	0	1	0	CT	0	1	0	0	1	27	0	20	7	0	0	1	6	0	0	26	1	19	0	0	0	37	0	23	0	3	0	0	33	32	0	22	11	19
821	27-Dec-21	10:20:00	1	0	1	0	CT	0	1	13	0	2	0	0	15	1	32	0	0	34	1	0	22	1	17	0	0	0	29	0	19	0	63	2	7	38	25	0	22	0	0
822	27-Dec-21	10:25:00	1	0	1	0	CT	0	1	51	0	1	1	0	11	0	17	0	15	7	2	0	16	9	17	0	35	0	27	0	8	0	37	34	0	43	19	0	0	10	0
823	27-Dec-21	10:30:00	1	0	1	0	CT	0	1	0	46	0	0	0	46	0	0	2	31	13	26	0	9	0	33	0	5	0	23	2	0	0	4	4	0	37	25	19	0	14	0
824	27-Dec-21	10:35:00	1	0	1	0	CT	0	1	10	0	0	62	0	26	0	0	28	11	14	59	0	24	0	23	0	0	0	34	1	0	0	0	0	0	33	23	25	0	0	0
825	27-Dec-21	10:40:00	1	0	1	0	CT	0	1	0	30	4	16	0	15	1	1	15	6	10	12	37	15	37	30	0	6	0	17	0	0	0	0	32	0	40	26	0	7	7	0
826	27-Dec-21	10:45:00	1	0	1	0	CT	0	1	0	32	0	2	0	10	7	0	0	13	0	21	55	22	3	31	0	30	0	31	0	0	0	0	23	0	46	17	0	0	0	3
827	27-Dec-21	10:50:00	1	0	1	0	CT	0	1	0	0	1	27	0	16	37	0	0	25	0	8	33	26	20	21	0	33	0	35	0	0	0	0	26	0	31	0	37	0	17	14
828	27-Dec-21	10:55:00	1	0	1	0	CT	0	1	8	0	0	13	0	6	21	24	0	22	0	0	47	28	22	19	0	0	0	15	0	0	0	0	65	0	56	41	5	0	27	16
829	27-Dec-21	11:00:00	1	0	1	0	CT	0	1	60	0	12	15	45	66	11	35	0	4	3	0	0	9	21	18	0	4	11	49	62	0	0	0	0	2	19	26	0	0	11	3
830	27-Dec-21	11:05:00	1	0	1	0	CT	0	1	0	0	7	14	89	11	6	27	0	13	14	0	0	28	16	10	0	54	76	35	0	18	0	0	0	8	27	7	18	0	7	6
831	27-Dec-21	11:10:00	1	0	1	0	CT	0	1	0	0	61	16	57	13	27	0	0	22	39	0	0	47	19	31	0	33	79	15	17	55	0	0	0	31	38	0	90	0	0	0
832	27-Dec-21	11:15:00	1	0	1	0	CT	0	1	12	0	61	5	41	20	0	0	8	17	10	0	0	21	0	54	0	17	96	24	37	36	0	0	3	0	37	18	9	0	2	0
833	27-Dec-21	11:20:00	1	0	1	0	CT	0	1	10	6	37	3	23	40	0	0	13	7	0	0	0	6	0	25	0	42	52	45	14	15	0	0	1	51	52	14	0	4	0	0
834	27-Dec-21	11:25:00	1	0	1	0	CT	0	1	63	10	48	0	41	19	0	0	0	23	0	2	0	8	0	10	0	30	54	24	4	19	0	31	25	42	50	16	0	56	0	0
835	27-Dec-21	11:30:00	1	0	1	0	CT	0	1	0	19	49	22	19	10	49	0	0	8	35	1	0	10	0	19	0	31	51	7	11	1	0	39	55	31	6	16	0	3	0	3
836	27-Dec-21	11:35:00	1	0	1	0	CT	0	1	0	14	34	13	0	24	59	21	0	24	0	68	0	0	0	46	0	41	62	0	0	3	0	30	58	11	8	24	0	0	3	0
837	27-Dec-21	11:40:00	1	0	1	0	CT	0	1	0	42	36	4	8	12	36	42	0	6	0	45	0	19	0	16	0	33	62	49	35	4	0	14	0	0	7	17	0	0	10	6
838	27-Dec-21	11:45:00	1	0	1	0	CT	0	1	0	3	15	6	1	25	28	0	0	0	0	28	0	11	0	15	0	26	40	35	14	4	0	0	0	0	8	20	0	0	10	0
839	27-Dec-21	11:50:00	1	0	1	0	CT	0	1	0	0	0	9	0	18	28	65	0	44	0	52	0	14	3	22	0	17	54	10	0	5	0	0	5	0	17	16	0	28	27	0
840	27-Dec-21	11:55:00	1	0	1	0	CT	0	1	0	15	0	14	0	19	22	36	0	1	0	35	0	14	31	9	0	18	82	28	9	68	0	0	0	0	4	7	0	22	0	0
841	27-Dec-21	12:00:00	1	0	1	0	CT	0	1	0	0	0	0	0	30	33	0	0	0	0	17	0	8	31	18	0	8	43	9	0	8	0	0	0	4	57	31	0	4	0	0
842	27-Dec-21	12:05:00	1	0	1	0	CT	0	1	58	0	0	0	0	27	26	1	2	0	0	2	0	25	20	26	0	6	61	2	19	3	0	39	3	18	75	16	23	13	10	0
843	27-Dec-21	12:10:00	1	0	1	0	CT	0	1	57	0	0	0	35	71	13	51	22	0	0	36	3	7	24	23	0	29	37	16	24	13	0	16	8	0	7	33	27	0	0	0
844	27-Dec-21	12:15:00	1	0	1	0	CT	0	1	63	0	0	0	0	8	23	8	0	0	0	84	31	0	1	40	0	56	36	12	17	6	0	16	61	0	27	12	0	0	0	0
845	27-Dec-21	12:20:00	1	0	1	0	CT	0	1	0	0	0	0	0	8	52	0	0	0	0	44	84	22	0	27	0	20	65	18	10	0	0	20	32	0	59	19	0	0	14	0
846	27-Dec-21	12:25:00	1	0	1	0	CT	0	1	0	0	3	0	0	35	37	17	13	10	0	7	45	40	0	24	0	15	48	48	12	0	0	9	0	0	5	1	2	0	0	0
847	27-Dec-21	12:30:00	1	0	1	0	CT	0	1	10	0	31	5	32	14	18	0	11	12	0	0	40	8	0	18	0	0	53	18	2	0	0	17	0	0	47	40	7	0	0	0
848	27-Dec-21	12:35:00	1	0	1	0	CT	0	1	0	0	14	29	18	65	22	0	0	16	0	0	2	12	0	34	0	0	19	8	4	1	0	6	0	0	46	7	6	0	0	0
849	27-Dec-21	12:40:00	1	0	1	0	CT	0	1	0	0	6	38	0	5	50	0	0	26	0	0	0	0	0	33	0	0	37	0	8	0	0	0	0	0	8	10	1	0	0	0
850	27-Dec-21	12:45:00	1	0	1	0	CT	0	1	26	0	1	15	0	13	24	0	0	12	0	0	0	0	0	16	0	0	69	0	4	0	0	0	0	1	33	28	0	0	0	2
851	27-Dec-21	12:50:00	1	0	1	0	CT	0	1	41	0	0	14	0	11	21	0	0	0	10	0	0	25	0	41	0	3	60	0	6	0	0	0	7	0	18	35	0	0	0	0
852	27-Dec-21	12:55:00	1	0	1	0	CT	0	1	9	0	0	0	0	2	38	0	0	0	6	15	0	39	0	28	0	0	51	0	75	0	0	0	42	4	18	17	0	0	0	1
853	27-Dec-21	13:00:00	1	0	1	0	CT	0	1	6	0	0	0	0	9	26	0	0	0	18	5	0	23	0	0	0	50	8	0	20	0	0	0	2	7	3	27	0	21	0	0
854	27-Dec-21	13:05:00	1	0	1	0	CT	0	1	0	0	0	0	0	8	0	0	0	0	0	0	0	54	0	23	0	82	0	0	0	0	0	0	0	25	10	0	1	47	0	1
855	27-Dec-21	13:10:00	1	0	1	0	CT	0	1	0	0	0	0	0	0	1	0	27	0	11	0	0	17	2	4	0	62	0	0	0	13	0	0	0	5	0	2	0	2	0	23
856	27-Dec-21	13:15:00	1	0	1	0	CT	0	1	7	0	0	0	0	0	0	0	9	0	7	1	0	3	0	27	0	17	0	0	0	2	0	0	0	22	0	0	0	0	31	0
857	27-Dec-21	13:20:00	1	0	1	0	CT	0	1	3	0	0	0	2	21	1	0	0	0	0	0	0	0	13	33	0	0	0	0	41	1	0	0	2	17	12	0	6	3	9	0
858	27-Dec-21	13:25:00	1	0	1	0	CT	0	1	0	0	0	0	22	0	5	0	0	0	0	0	0	0	8	26	0	3	0	0	3	0	0	0	9	4	34	0	33	0	0	0
859	27-Dec-21	13:30:00	1	0	1	0	CT	0	1	0	0	0	0	1	2	0	0	2	0	15	0	0	0	0	18	0	0	23	20	20	0	0	0	0	11	40	0	63	0	2	0
860	27-Dec-21	13:35:00	1	0	1	0	CT	0	1	40	0	2	8	4	0	0	18	0	0	33	0	0	18	0	21	0	0	60	0	4	0	0	9	0	15	14	0	0	0	0	26
861	27-Dec-21	13:40:00	1	0	1	0	CT	0	1	16	0	34	0	0	3	0	0	1	0	21	0	0	18	0	0	0	0	99	0	0	0	0	52	0	38	29	0	0	0	0	10
862	27-Dec-21	13:45:00	1	0	1	0	CT	0	1	0	0	34	0	0	0	0	0	0	4	0	11	0	10	0	0	0	0	58	5	6	0	0	0	1	34	30	0	0	0	2	0
863	27-Dec-21	13:50:00	1	0	1	0	CT	0	1	0	0	34	0	1	3	0	0	6	3	0	54	0	0	0	0	0	9	56	0	1	0	0	0	0	7	6	4	0	0	10	0
864	27-Dec-21	13:55:00	1	0	1	0	CT	0	1	0	0	52	0	0	0	0	0	43	11	0	25	0	0	3	0	0	63	39	7	0	0	0	0	3	0	16	4	3	0	0	0
865	27-Dec-21	14:00:00	1	0	1	0	CT	0	1	0	0	37	0	0	0	0	0	1	23	0	29	0	11	0	0	0	27	72	6	18	0	0	0	0	0	4	35	0	0	0	0
866	27-Dec-21	14:05:00	1	0	1	0	CT	0	1	0	14	0	0	1	42	26	0	14	33	0	0	0	29	0	0	0	35	55	0	21	0	0	0	0	0	10	14	0	0	0	0
867	27-Dec-21	14:10:00	1	0	1	0	CT	0	1	0	42	0	0	0	16	59	0	0	15	0	2	0	12	0	0	0	7	19	0	1	0	0	0	0	1	0	0	0	0	0	0
868	27-Dec-21	14:15:00	1	0	1	0	CT	0	1	0	0	0	0	0	16	43	2	9	29	0	2	0	12	0	0	0	0	0	0	0	0	0	0	1	0	7	0	41	0	0	0
869	27-Dec-21	14:20:00	1	0	1	0	CT	0	1	0	0	0	12	3	3	41	41	42	12	0	0	1	0	0	1	0	0	1	0	0	0	0	0	2	0	2	3	16	0	0	0
870	27-Dec-21	14:25:00	1	0	1	0	CT	0	1	0	0	0	0	38	0	15	0	83	5	0	3	30	37	0	8	0	1	1	0	3	0	0	0	33	7	0	0	11	4	0	0
871	27-Dec-21	14:30:00	1	0	1	0	CT	0	1	0	0	0	35	60	0	13	18	7	0	0	6	58	5	0	78	0	16	0	0	20	0	0	0	17	13	0	10	0	34	5	0
872	27-Dec-21	14:35:00	1	0	1	0	CT	0	1	0	0	0	0	65	15	0	10	0	0	0	0	56	9	39	41	0	9	0	0	7	0	0	0	0	14	0	60	0	14	7	9
873	27-Dec-21	14:40:00	1	0	1	0	CT	0	1	34	12	0	12	4	53	0	56	0	0	0	0	34	14	6	22	0	25	2	36	0	0	0	0	0	18	0	26	0	22	11	0
874	27-Dec-21	14:45:00	1	0	1	0	CT	0	1	8	41	0	36	0	19	0	47	0	0	0	9	36	10	39	12	0	12	10	2	9	0	0	0	13	0	0	14	0	22	24	0
875	27-Dec-21	14:50:00	1	0	1	0	CT	0	1	0	1	0	0	0	0	0	50	0	5	0	0	50	9	0	22	0	11	0	0	0	0	0	0	43	15	0	28	0	19	4	0
876	27-Dec-21	14:55:00	1	0	1	0	CT	0	1	15	0	1	0	0	0	0	0	0	28	15	0	22	4	0	1	0	21	21	0	0	0	0	0	61	4	0	32	0	0	0	0
877	27-Dec-21	15:00:00	1	0	1	0	CT	0	1	0	0	0	0	0	0	0	0	0	0	7	0	0	1	0	0	0	0	39	10	23	0	0	0	77	3	0	8	1	0	0	0
878	27-Dec-21	15:05:00	1	0	1	0	CT	0	1	0	0	0	0	0	0	0	0	0	0	0	0	0	0	0	2	0	0	89	0	5	0	0	0	15	0	2	8	0	0	0	0
879	27-Dec-21	15:10:00	1	0	1	0	CT	0	1	0	2	35	63	0	0	0	0	0	0	0	0	0	0	0	0	0	0	82	0	1	0	0	0	0	0	0	20	0	0	0	0
880	27-Dec-21	15:15:00	1	0	1	0	CT	0	1	3	0	4	0	0	0	0	0	0	28	0	0	0	0	0	48	0	0	48	0	0	0	0	33	0	0	0	20	0	0	0	0
881	27-Dec-21	15:20:00	1	0	1	0	CT	0	1	3	0	2	0	2	0	0	0	0	1	0	0	0	0	0	36	0	0	27	0	0	0	0	12	0	0	0	12	0	0	0	0
882	27-Dec-21	15:25:00	1	0	1	0	CT	0	1	0	0	3	0	68	0	0	0	0	0	0	0	0	5	0	22	0	0	0	0	0	4	0	9	0	0	0	0	37	0	0	0
883	27-Dec-21	15:30:00	1	0	1	0	CT	0	1	0	0	0	0	17	0	0	0	0	0	0	0	0	1	26	17	0	0	0	0	21	15	0	34	0	0	0	0	65	0	0	0
884	27-Dec-21	15:35:00	1	0	1	0	CT	0	1	0	5	0	0	0	0	2	11	0	0	0	0	0	0	26	25	0	1	0	0	3	11	0	28	26	4	0	0	65	0	0	0
885	27-Dec-21	15:40:00	1	0	1	0	CT	0	1	0	0	0	32	0	0	9	42	0	2	0	0	0	0	58	11	0	50	0	8	0	0	0	0	24	21	0	0	80	0	0	0
886	27-Dec-21	15:45:00	1	0	1	0	CT	0	1	0	0	0	38	0	0	63	1	0	0	0	0	0	0	38	0	0	51	0	23	9	0	0	0	63	23	2	0	85	1	0	0
887	27-Dec-21	15:50:00	1	0	1	0	CT	0	1	0	0	0	1	1	24	42	0	14	0	0	0	0	0	11	2	0	0	0	11	0	0	0	0	5	2	1	0	64	3	0	0
888	27-Dec-21	15:55:00	1	0	1	0	CT	0	1	3	0	0	0	0	45	43	0	22	0	16	0	1	0	5	2	0	10	0	14	0	0	0	1	6	17	0	0	63	20	0	36
889	27-Dec-21	16:00:00	1	0	1	0	CT	0	1	63	0	0	0	0	43	38	0	0	0	0	0	56	0	0	27	0	20	0	40	0	0	0	0	2	0	0	0	32	34	0	13
890	27-Dec-21	16:05:00	1	0	1	0	CT	0	1	0	0	0	0	0	8	6	6	0	0	0	0	37	0	0	23	0	48	0	17	0	1	0	0	0	8	0	0	37	25	22	9
891	27-Dec-21	16:10:00	1	0	1	0	CT	0	1	0	0	2	0	2	0	1	0	0	13	27	3	18	0	0	31	0	28	0	0	2	55	0	0	3	21	0	0	0	0	0	20
892	27-Dec-21	16:15:00	1	0	1	0	CT	0	1	0	0	0	0	0	7	0	0	0	2	2	23	0	0	0	20	0	24	0	0	10	55	0	2	2	5	0	0	63	7	1	10
893	27-Dec-21	16:20:00	1	0	1	0	CT	0	1	0	31	0	0	0	4	0	0	0	0	0	0	0	9	0	0	0	56	0	0	12	14	0	8	1	17	0	0	31	0	2	27
894	27-Dec-21	16:25:00	1	0	1	0	CT	0	1	0	20	0	0	0	0	1	0	0	2	0	0	0	3	0	0	0	39	0	0	0	1	0	0	1	10	0	0	3	0	2	9
895	27-Dec-21	16:30:00	1	0	1	0	CT	0	1	0	0	0	0	0	0	0	0	0	14	0	0	0	15	0	0	0	28	34	0	44	25	0	0	19	0	0	0	31	0	8	0
896	27-Dec-21	16:35:00	1	0	1	0	CT	0	1	0	76	2	0	1	0	0	0	0	8	0	0	0	6	0	9	0	4	83	0	8	0	0	1	0	0	0	0	33	0	2	0
897	27-Dec-21	16:40:00	1	0	1	0	CT	0	1	0	0	3	0	52	0	0	0	0	20	0	10	0	9	0	2	0	21	49	0	0	1	0	0	10	13	0	0	0	0	12	7
898	27-Dec-21	16:45:00	1	0	1	0	CT	0	1	0	0	1	0	61	0	0	0	0	1	0	0	0	24	0	5	0	0	5	3	0	7	0	7	3	0	0	0	0	0	22	0
899	27-Dec-21	16:50:00	1	0	1	0	CT	0	1	0	0	63	0	0	0	1	0	0	0	0	0	0	3	3	0	0	0	0	0	0	0	0	0	0	3	0	0	0	0	11	0
900	27-Dec-21	16:55:00	1	0	1	0	CT	0	1	0	0	8	31	0	0	13	0	0	0	45	13	0	3	5	3	0	0	0	0	0	0	0	0	0	23	4	7	0	0	2	0
901	27-Dec-21	17:00:00	1	0	1	0	CT	0	1	67	0	4	0	0	28	0	0	0	0	0	0	0	7	1	65	0	0	0	0	0	0	0	0	0	0	14	32	70	54	1	0
902	27-Dec-21	17:05:00	1	0	1	0	CT	0	1	52	0	0	9	0	19	0	0	0	0	0	21	0	6	0	25	0	0	0	0	1	0	0	0	2	0	41	18	25	13	0	0
903	27-Dec-21	17:10:00	1	0	1	0	CT	0	1	3	0	0	36	0	28	0	0	0	0	0	28	0	8	0	0	0	0	0	0	44	0	0	0	0	0	57	19	0	30	0	0
904	27-Dec-21	17:15:00	1	0	1	0	CT	0	1	0	0	0	73	0	63	0	0	23	0	0	41	11	7	0	0	0	0	0	0	42	0	0	0	0	3	9	66	0	8	0	0
905	27-Dec-21	17:20:00	1	0	1	0	CT	0	1	0	0	0	0	0	51	0	0	14	5	0	54	61	3	0	0	0	0	0	0	14	1	0	0	0	4	3	33	0	0	0	0
906	27-Dec-21	17:25:00	1	0	1	0	CT	0	1	0	0	23	0	0	70	5	0	0	2	4	55	21	5	0	1	0	0	5	0	0	23	0	0	0	1	8	9	0	0	0	0
907	27-Dec-21	17:30:00	1	0	1	0	CT	0	1	0	0	0	0	0	35	0	0	0	0	7	8	48	0	0	0	0	8	6	0	1	40	0	0	0	8	0	0	23	0	0	0
908	27-Dec-21	17:35:00	1	0	1	0	CT	0	1	0	0	4	0	0	18	0	0	0	0	0	0	4	0	0	0	0	47	0	0	0	3	0	0	0	11	0	0	8	0	0	22
909	27-Dec-21	17:40:00	1	0	1	0	CT	0	1	0	0	0	0	0	0	0	2	0	0	0	0	0	0	0	0	0	43	0	0	5	9	0	0	4	13	9	0	0	0	0	44
910	27-Dec-21	17:45:00	1	0	1	0	CT	0	1	0	0	4	0	24	0	0	0	0	0	0	0	0	0	0	2	0	22	9	0	1	0	0	0	4	24	1	0	0	0	0	0
911	27-Dec-21	17:50:00	1	0	1	0	CT	0	1	0	0	0	0	72	0	9	26	0	0	0	0	0	0	0	4	0	32	0	2	0	0	0	0	6	35	0	0	0	0	0	0
912	27-Dec-21	17:55:00	1	0	1	0	CT	0	1	0	2	0	0	51	0	25	0	2	0	0	0	0	0	8	49	0	34	0	1	0	0	0	0	0	46	0	0	28	0	0	0
913	27-Dec-21	18:00:00	1	0	1	0	CT	0	1	0	0	0	0	24	0	44	0	1	0	0	0	0	10	4	55	0	28	0	3	0	0	0	0	0	5	0	0	60	0	5	0
914	27-Dec-21	18:05:00	1	0	1	0	CT	0	1	0	0	0	0	0	0	41	0	1	0	2	0	0	3	0	5	0	12	0	0	0	0	0	0	0	0	0	0	100	0	15	0
915	27-Dec-21	18:10:00	1	0	1	0	CT	0	1	0	0	0	0	0	0	12	0	0	0	0	0	0	6	33	2	0	0	4	0	0	0	0	0	0	0	0	0	57	0	31	34
916	27-Dec-21	18:15:00	1	0	1	0	CT	0	1	0	0	0	0	0	0	24	7	35	0	1	0	0	4	0	0	0	0	0	0	56	0	0	0	0	0	0	0	40	0	2	9
917	27-Dec-21	18:20:00	1	0	1	0	CT	0	1	0	0	4	65	0	0	8	8	27	2	21	0	0	13	0	0	0	0	0	0	68	0	0	2	0	2	0	0	32	0	0	0
918	27-Dec-21	18:25:00	1	0	1	0	CT	0	1	31	0	0	26	0	0	13	52	0	1	2	11	0	2	0	0	0	0	0	0	60	15	0	0	0	0	0	12	28	0	0	10
919	27-Dec-21	18:30:00	1	0	1	0	CT	0	1	1	0	0	1	0	0	0	30	0	3	26	3	0	0	29	0	0	0	0	0	63	45	0	0	4	1	0	0	0	0	0	0
920	27-Dec-21	18:35:00	1	0	1	0	CT	0	1	34	0	4	0	0	0	0	0	0	0	17	0	0	0	23	0	0	0	0	2	25	43	0	0	11	11	0	25	0	0	0	0
921	27-Dec-21	18:40:00	1	0	1	0	CT	0	1	0	0	20	0	0	0	0	4	0	15	26	0	0	0	46	0	0	0	19	0	0	0	0	0	1	9	0	71	0	0	0	0
922	27-Dec-21	18:45:00	1	0	1	0	CT	0	1	0	0	62	0	0	0	0	29	3	19	0	0	0	0	40	5	0	14	47	0	0	55	0	0	25	17	0	31	0	0	0	0
923	27-Dec-21	18:50:00	1	0	1	0	CT	0	1	0	3	54	0	0	0	0	0	0	5	0	0	0	0	25	0	0	35	100	0	5	24	0	0	12	24	0	19	0	0	0	6
924	27-Dec-21	18:55:00	1	0	1	0	CT	0	1	16	3	34	0	0	0	0	0	4	0	16	0	10	0	0	0	0	49	75	0	1	0	0	0	49	8	3	8	0	0	0	48
925	27-Dec-21	19:00:00	1	0	1	0	CT	0	1	0	0	14	0	0	0	0	3	46	0	0	9	9	0	0	0	0	37	25	0	8	0	0	0	62	13	34	26	0	0	9	17
926	27-Dec-21	19:05:00	1	0	1	0	CT	0	1	0	25	0	0	0	0	0	42	0	0	0	5	44	0	0	0	0	1	0	0	1	0	0	12	4	0	91	34	0	0	3	0
927	27-Dec-21	19:10:00	1	0	1	0	CT	0	1	0	0	0	0	0	0	0	22	0	0	0	20	30	19	0	0	0	6	0	0	0	0	0	21	1	15	1	0	0	12	0	0
928	27-Dec-21	19:15:00	1	0	1	0	CT	0	1	4	0	0	0	10	0	0	0	0	0	0	62	8	17	0	0	0	0	0	0	0	0	0	0	0	82	17	0	11	0	0	18
929	27-Dec-21	19:20:00	1	0	1	0	CT	0	1	0	1	0	0	24	0	0	0	0	0	0	27	0	42	0	0	0	0	0	0	0	0	0	1	3	10	31	0	1	0	0	1
930	27-Dec-21	19:25:00	1	0	1	0	CT	0	1	0	28	0	0	62	0	0	0	0	0	0	0	0	6	0	0	0	0	8	43	78	0	0	0	4	10	42	0	0	26	17	0
931	27-Dec-21	19:30:00	1	0	1	0	CT	0	1	0	46	0	43	13	0	0	0	3	0	9	0	0	0	4	0	0	0	0	0	67	2	0	0	0	66	19	0	0	0	24	0
932	27-Dec-21	19:35:00	1	0	1	0	CT	0	1	18	0	0	64	8	0	4	29	0	0	36	12	0	1	1	0	0	39	0	0	29	4	0	0	13	44	13	0	2	3	42	0
933	27-Dec-21	19:40:00	1	0	1	0	CT	0	1	42	0	0	37	1	0	25	0	60	0	0	0	0	1	1	0	0	11	0	0	9	16	0	0	50	29	2	0	29	15	34	0
934	27-Dec-21	19:45:00	1	0	1	0	CT	0	1	40	0	0	19	0	0	41	0	20	0	0	0	0	0	0	18	0	17	0	0	0	1	0	0	7	1	0	0	25	0	10	0
935	27-Dec-21	19:50:00	1	0	1	0	CT	0	1	16	0	0	0	1	0	21	0	36	0	0	0	0	0	14	37	0	20	0	28	0	4	0	0	4	0	0	0	0	25	2	0
936	27-Dec-21	19:55:00	1	0	1	0	CT	0	1	0	0	0	0	3	53	0	0	0	0	0	1	0	0	15	35	0	28	0	28	0	5	0	9	5	0	0	0	0	14	0	0
937	27-Dec-21	20:00:00	1	0	1	0	CT	0	1	0	0	33	8	0	28	2	0	0	0	0	0	0	0	31	0	0	19	0	3	0	0	0	0	2	0	0	0	0	8	0	0
938	27-Dec-21	20:05:00	1	0	1	0	CT	0	1	1	0	63	0	7	30	0	0	63	0	0	0	7	0	19	0	0	0	0	0	0	5	0	17	3	0	0	0	0	1	0	0
939	27-Dec-21	20:10:00	1	0	1	0	CT	0	0	4	34	32	23	73	0	4	0	66	14	0	4	27	0	16	1	0	0	0	0	0	28	0	20	3	63	0	0	0	0	0	46
940	27-Dec-21	20:15:00	1	0	1	0	CT	0	0	46	45	57	81	15	0	0	0	52	2	0	56	58	0	10	0	0	3	0	0	0	25	0	20	0	0	0	0	0	0	0	23
941	27-Dec-21	20:20:00	1	0	1	0	CT	0	0	11	29	28	15	0	0	0	5	52	0	0	70	35	0	1	47	0	65	61	24	0	59	0	7	2	0	0	0	0	0	0	55
942	27-Dec-21	20:25:00	1	0	1	0	CT	0	0	99	14	50	44	0	0	0	36	1	0	0	24	42	0	23	43	0	31	89	55	0	67	0	13	104	9	0	0	0	0	0	3
943	27-Dec-21	20:30:00	1	0	1	0	CT	0	0	6	25	64	56	60	0	0	58	0	0	0	30	60	0	48	1	0	38	76	24	0	39	0	0	76	9	40	0	0	0	0	0
944	27-Dec-21	20:35:00	1	0	1	0	CT	0	0	1	28	46	0	69	0	2	44	0	10	0	18	51	13	62	0	0	43	94	28	44	13	0	19	17	7	24	0	3	0	0	0
945	27-Dec-21	20:40:00	1	0	1	0	CT	0	0	0	0	19	11	48	58	1	44	49	13	0	0	40	17	0	28	0	76	115	0	50	3	0	25	51	18	57	0	59	0	0	0
946	27-Dec-21	20:45:00	1	0	1	0	CT	0	0	35	19	58	24	0	22	25	0	83	9	22	0	40	0	11	19	0	50	109	15	3	2	0	0	75	0	48	8	64	0	24	0
947	27-Dec-21	20:50:00	1	0	1	0	CT	0	0	84	69	46	17	16	0	32	0	59	0	37	1	22	14	34	39	0	57	82	63	29	30	0	0	32	15	31	5	77	0	5	61
948	27-Dec-21	20:55:00	1	0	1	0	CT	0	0	3	0	42	61	71	40	10	0	20	9	40	74	49	0	0	10	0	12	81	0	18	0	0	18	14	19	21	32	70	0	0	2
949	27-Dec-21	21:00:00	1	0	1	0	CT	0	0	30	0	52	16	35	31	32	39	30	5	55	70	47	23	75	0	0	53	98	36	49	24	0	17	20	10	18	45	40	0	16	0
950	27-Dec-21	21:05:00	1	0	1	0	CT	0	0	43	27	33	9	94	20	7	65	0	3	27	43	42	36	78	0	0	69	74	28	69	40	0	8	74	43	32	0	56	0	34	26
951	27-Dec-21	21:10:00	1	0	1	0	CT	0	0	12	38	42	22	57	4	14	15	0	0	54	8	49	27	16	38	0	71	68	30	0	21	0	0	80	0	32	0	75	0	32	0
952	27-Dec-21	21:15:00	1	0	1	0	CT	0	0	6	15	29	51	31	8	40	12	0	14	47	0	46	68	37	21	0	56	84	9	0	74	0	1	7	48	68	0	34	0	22	0
953	27-Dec-21	21:20:00	1	0	1	0	CT	0	0	3	2	28	77	1	0	12	0	31	13	46	0	36	10	0	0	0	27	94	9	18	38	0	0	0	0	40	0	26	13	42	0
954	27-Dec-21	21:25:00	1	0	1	0	CT	0	0	0	42	47	18	23	0	11	0	80	4	48	0	50	1	25	0	0	32	87	22	22	35	0	15	10	16	31	35	4	40	2	0
955	27-Dec-21	21:30:00	1	0	1	0	CT	0	0	4	24	38	71	54	13	1	13	0	28	5	59	45	0	5	8	0	85	69	35	0	3	0	18	0	47	37	46	0	0	0	15
956	27-Dec-21	21:35:00	1	0	1	0	CT	0	0	7	19	44	19	53	18	66	46	0	34	37	99	33	1	0	14	0	36	75	34	39	25	0	29	3	33	29	20	0	0	0	8
957	27-Dec-21	21:40:00	1	0	1	0	CT	0	0	21	41	41	14	9	76	56	34	22	55	44	39	34	0	2	2	0	42	73	28	47	4	0	22	57	0	50	7	0	0	0	0
958	27-Dec-21	21:45:00	1	0	1	0	CT	0	0	37	14	33	3	43	41	35	47	67	24	23	0	41	18	3	63	0	47	73	64	59	13	0	0	69	27	38	0	22	0	0	64
959	27-Dec-21	21:50:00	1	0	1	0	CT	0	0	7	0	40	13	28	4	11	36	5	30	1	16	39	62	0	1	0	50	69	0	22	27	0	0	99	0	13	10	3	0	0	6
960	27-Dec-21	21:55:00	1	0	1	0	CT	0	0	8	26	37	21	39	0	44	1	75	16	0	15	46	38	0	39	0	51	70	0	1	14	0	1	22	0	42	0	0	0	0	30
961	27-Dec-21	22:00:00	1	0	1	0	CT	0	0	0	0	46	1	37	0	15	0	40	12	0	0	36	30	0	30	0	63	69	0	10	45	0	0	32	7	30	0	0	0	41	22
962	27-Dec-21	22:05:00	1	0	1	0	CT	0	0	3	27	41	15	42	11	10	6	20	29	24	15	47	18	51	0	0	52	110	5	42	25	0	1	47	55	40	24	20	0	0	27
963	27-Dec-21	22:10:00	1	0	1	0	CT	0	0	3	24	48	29	48	11	25	30	55	25	16	18	61	22	48	35	0	32	77	39	28	16	0	1	67	12	8	37	48	0	30	0
964	27-Dec-21	22:15:00	1	0	1	0	CT	0	0	0	10	22	14	51	0	10	0	0	5	38	31	40	12	28	13	0	42	66	35	0	15	0	13	67	30	29	27	49	43	22	0
965	27-Dec-21	22:20:00	1	0	1	0	CT	0	0	13	22	52	0	47	20	22	0	0	0	37	37	35	7	16	0	0	15	69	33	0	0	0	17	68	30	41	31	17	7	11	0
966	27-Dec-21	22:25:00	1	0	1	0	CT	0	0	0	0	49	58	44	0	28	0	0	0	22	48	41	5	0	0	0	5	59	46	17	63	0	32	66	47	53	6	11	1	0	0
967	27-Dec-21	22:30:00	1	0	1	0	CT	0	0	0	38	48	31	63	32	16	0	0	19	27	0	39	10	0	42	0	64	71	2	38	77	0	41	73	27	8	3	18	0	0	11
968	27-Dec-21	22:35:00	1	0	1	0	CT	0	0	63	12	36	0	38	5	21	0	0	22	47	0	42	31	0	24	0	38	49	4	52	63	0	12	52	0	40	40	62	0	0	19
969	27-Dec-21	22:40:00	1	0	1	0	CT	0	0	63	28	55	37	0	16	29	11	31	26	48	8	43	0	0	0	0	38	67	32	73	75	0	0	40	0	55	12	0	0	10	9
970	27-Dec-21	22:45:00	1	0	1	0	CT	0	0	11	17	20	14	4	3	7	28	30	15	23	29	52	40	38	13	0	75	82	50	9	25	0	0	59	14	83	24	2	0	59	16
971	27-Dec-21	22:50:00	1	0	1	0	CT	0	0	54	0	49	0	72	34	0	42	0	0	10	38	54	11	27	0	0	44	81	7	2	17	0	0	92	41	39	25	15	0	16	0
972	27-Dec-21	22:55:00	1	0	1	0	CT	0	0	67	29	33	28	34	30	39	52	0	0	0	33	50	32	48	0	0	26	73	32	2	10	0	0	49	23	23	31	22	0	0	9
973	27-Dec-21	23:00:00	1	0	1	0	CT	0	0	16	22	43	29	33	14	48	46	0	9	38	1	39	26	48	30	0	49	42	18	10	15	0	0	58	11	40	12	0	0	0	0
974	27-Dec-21	23:05:00	1	0	1	0	CT	0	0	22	8	30	31	33	0	46	13	0	14	0	12	45	15	43	63	0	67	108	3	23	56	0	28	70	17	49	4	56	0	1	6
975	27-Dec-21	23:10:00	1	0	1	0	CT	0	0	8	20	34	30	53	7	26	0	1	0	0	0	26	7	71	15	0	54	79	53	0	32	0	15	24	45	45	19	76	0	0	15
976	27-Dec-21	23:15:00	1	0	1	0	CT	0	0	6	0	79	62	49	27	31	0	0	16	24	34	50	16	34	8	0	63	82	23	56	5	0	0	84	12	49	39	2	0	13	8
977	27-Dec-21	23:20:00	1	0	1	0	CT	0	0	0	0	68	27	72	15	30	0	0	19	0	85	37	15	17	12	0	63	93	70	0	41	0	30	40	27	31	24	19	0	14	9
978	27-Dec-21	23:25:00	1	0	1	0	CT	0	0	40	0	16	38	43	10	14	18	16	0	0	56	29	31	0	45	0	43	82	6	0	42	0	9	5	31	40	25	50	22	20	20
979	27-Dec-21	23:30:00	1	0	1	0	CT	0	0	0	25	31	0	44	33	34	32	0	16	0	35	45	30	62	23	0	38	72	54	0	18	0	6	0	28	70	34	44	49	0	21
980	27-Dec-21	23:35:00	1	0	1	0	CT	0	0	0	39	42	23	58	52	35	67	0	69	0	38	53	25	22	23	0	52	90	50	22	34	0	0	73	32	41	28	2	0	0	19
981	27-Dec-21	23:40:00	1	0	1	0	CT	0	0	0	0	65	0	77	67	39	29	6	12	13	0	43	27	22	44	0	64	72	26	33	80	0	43	53	8	48	64	18	0	0	26
982	27-Dec-21	23:45:00	1	0	1	0	CT	0	0	0	0	43	0	68	34	59	39	0	15	0	36	34	18	20	19	0	66	88	1	3	29	0	41	70	0	81	24	17	0	2	15
983	27-Dec-21	23:50:00	1	0	1	0	CT	0	0	0	0	51	0	70	18	31	31	0	10	0	63	59	19	4	31	0	71	72	21	37	58	0	0	32	14	29	22	8	0	2	23
984	27-Dec-21	23:55:00	1	0	1	0	CT	0	0	0	0	40	0	59	42	20	60	41	25	0	21	34	0	11	34	0	29	85	62	2	69	0	46	20	0	45	57	0	0	11	0
985	28-Dec-21	0:00:00	1	0	1	0	CT	0	0	0	0	47	0	54	30	46	52	0	19	0	0	60	0	42	7	0	63	110	68	5	31	0	5	63	12	57	30	37	0	0	0
986	28-Dec-21	0:05:00	1	0	1	0	CT	0	0	16	0	46	0	86	21	45	47	0	0	0	0	33	0	51	25	0	59	91	0	2	39	0	9	24	0	24	51	0	29	0	7
987	28-Dec-21	0:10:00	1	0	1	0	CT	0	0	33	0	41	0	87	0	40	64	0	17	0	0	49	0	27	13	0	58	101	12	76	42	0	34	9	0	43	36	32	0	1	18
988	28-Dec-21	0:15:00	1	0	1	0	CT	0	0	19	0	61	0	59	0	35	65	0	12	0	0	52	63	13	0	0	54	96	20	42	6	0	33	6	0	30	30	19	13	0	0
989	28-Dec-21	0:20:00	1	0	1	0	CT	0	0	40	0	57	0	88	0	31	79	0	15	0	0	57	31	49	0	0	52	70	3	4	0	0	18	0	0	36	67	30	0	0	0
990	28-Dec-21	0:25:00	1	0	1	0	CT	0	0	0	0	54	0	59	0	30	51	0	0	0	0	44	34	26	2	0	29	89	0	0	0	0	27	18	0	28	33	0	1	0	29
991	28-Dec-21	0:30:00	1	0	1	0	CT	0	0	39	0	39	0	100	0	61	30	5	7	0	0	47	41	70	10	0	66	77	0	10	4	0	17	38	0	37	19	15	0	0	27
992	28-Dec-21	0:35:00	1	0	1	0	CT	0	0	24	0	38	0	78	0	57	44	0	0	0	0	40	0	11	6	0	53	101	0	4	1	0	18	69	0	29	6	9	0	0	17
993	28-Dec-21	0:40:00	1	0	1	0	CT	0	0	60	0	83	0	66	0	38	57	0	4	0	0	59	0	5	0	0	64	79	0	1	0	0	28	47	0	42	43	46	0	0	0
994	28-Dec-21	0:45:00	1	0	1	0	CT	0	0	0	0	63	0	72	0	84	49	0	0	0	0	63	0	20	9	0	66	87	0	14	0	0	38	27	0	0	28	0	0	0	35
995	28-Dec-21	0:50:00	1	0	1	0	CT	0	0	0	0	43	0	67	0	33	20	0	3	0	0	56	0	20	0	0	53	74	0	10	12	0	38	50	0	0	65	0	0	0	21
996	28-Dec-21	0:55:00	1	0	1	0	CT	0	0	0	0	52	0	94	0	9	0	5	0	0	0	33	0	41	15	0	63	107	0	2	31	0	20	24	8	0	12	0	0	0	0
997	28-Dec-21	1:00:00	1	0	1	0	CT	0	0	0	0	35	0	77	0	51	0	0	0	0	0	42	0	29	0	0	59	86	0	0	63	0	0	4	0	0	0	0	0	0	0
998	28-Dec-21	1:05:00	1	0	1	0	CT	0	0	0	0	43	0	57	0	22	0	0	0	0	0	33	0	63	16	0	34	108	0	2	0	0	0	0	0	0	0	0	0	4	0
999	28-Dec-21	1:10:00	1	0	1	0	CT	0	0	0	0	38	0	77	0	30	0	0	0	0	0	31	0	1	45	0	14	90	39	0	0	0	0	0	0	0	0	0	0	20	0
1000	28-Dec-21	1:15:00	1	0	1	0	CT	0	0	0	0	54	0	91	0	49	0	0	0	0	0	23	0	0	35	0	50	98	0	0	0	0	0	0	0	0	0	0	4	0	0
1001	28-Dec-21	1:20:00	1	0	1	0	CT	0	0	0	0	55	0	103	0	32	1	0	0	0	0	37	0	0	69	0	35	74	0	7	0	0	0	29	0	0	0	0	19	0	0
1002	28-Dec-21	1:25:00	1	0	1	0	CT	0	0	0	0	46	0	92	0	29	0	0	0	0	0	64	0	0	47	0	27	111	0	32	2	0	0	0	0	0	0	11	56	0	0
1003	28-Dec-21	1:30:00	1	0	1	0	CT	0	0	7	0	26	0	38	0	20	1	0	0	0	0	25	0	0	32	0	46	75	0	0	0	0	0	3	0	0	0	27	45	0	0
1004	28-Dec-21	1:35:00	1	0	1	0	CT	0	0	1	0	49	0	67	0	0	3	0	0	0	6	0	0	0	24	0	5	94	0	0	0	0	0	0	0	0	0	21	0	8	5
1005	28-Dec-21	1:40:00	1	0	1	0	CT	0	0	1	0	44	0	63	0	0	0	0	0	0	13	0	0	0	0	0	1	78	0	2	1	0	0	0	0	0	0	25	0	0	1
1006	28-Dec-21	1:45:00	1	0	1	0	CT	0	0	1	0	26	0	94	0	0	0	0	0	0	6	0	0	0	0	0	0	79	0	0	0	0	0	0	0	0	0	4	0	0	1
1007	28-Dec-21	1:50:00	1	0	1	0	CT	0	0	0	0	63	0	35	0	0	21	0	0	0	2	0	0	0	0	0	4	102	0	0	3	0	0	0	0	0	0	1	0	1	0
1008	28-Dec-21	1:55:00	1	0	1	0	CT	0	0	1	0	20	0	35	0	0	39	0	0	0	0	0	0	0	0	0	5	75	0	1	0	0	34	0	0	1	0	14	0	0	0
1009	28-Dec-21	2:00:00	1	0	1	0	CT	0	0	4	0	43	0	22	0	0	0	0	0	0	0	0	0	0	0	0	1	101	0	4	3	0	19	0	0	0	0	5	0	1	0
1010	28-Dec-21	2:05:00	1	0	1	0	CT	0	0	0	0	35	0	41	0	0	0	0	0	13	0	0	0	0	0	0	8	77	0	0	0	0	1	0	0	0	0	0	0	0	1
1011	28-Dec-21	2:10:00	1	0	1	0	CT	0	0	0	0	25	0	5	0	0	2	0	0	0	0	0	0	0	24	0	26	68	0	12	0	0	0	0	0	0	0	0	0	0	5
1012	28-Dec-21	2:15:00	1	0	1	0	CT	0	0	0	0	0	0	1	0	0	0	0	0	0	0	0	0	0	0	0	0	71	0	0	0	0	0	0	0	0	0	0	0	0	0
1013	28-Dec-21	2:20:00	1	0	1	0	CT	0	0	0	0	0	0	0	0	0	0	0	0	0	0	0	0	0	7	0	0	43	0	0	0	0	0	6	0	0	0	56	0	0	1
1014	28-Dec-21	2:25:00	1	0	1	0	CT	0	0	0	0	0	0	3	0	0	0	0	0	20	0	0	0	0	40	0	0	42	0	1	0	0	0	1	0	20	0	57	0	12	7
1015	28-Dec-21	2:30:00	1	0	1	0	CT	0	0	0	0	0	0	0	0	0	0	0	0	0	0	0	0	0	36	0	0	50	0	9	0	0	0	63	0	0	0	18	7	0	0
1016	28-Dec-21	2:35:00	1	0	1	0	CT	0	0	0	0	0	0	0	0	0	0	0	0	0	1	0	0	0	0	0	0	63	0	0	0	0	0	0	0	0	0	17	0	3	0
1017	28-Dec-21	2:40:00	1	0	1	0	CT	0	0	0	0	0	0	0	0	0	0	0	0	0	0	0	0	0	0	0	0	37	1	1	0	0	0	0	0	23	0	16	0	0	0
1018	28-Dec-21	2:45:00	1	0	1	0	CT	0	0	0	0	0	0	1	0	0	0	0	0	0	0	0	0	0	2	0	0	0	14	16	0	0	0	0	0	0	0	0	0	0	0
1019	28-Dec-21	2:50:00	1	0	1	0	CT	0	0	0	0	0	0	0	0	0	0	2	0	0	2	0	0	0	0	0	0	0	4	0	0	0	0	0	0	0	0	15	0	0	0
1020	28-Dec-21	2:55:00	1	0	1	0	CT	0	0	0	0	0	0	0	0	0	10	0	0	0	8	0	0	0	6	0	0	0	3	0	0	0	0	16	0	0	0	2	0	0	0
1021	28-Dec-21	3:00:00	1	0	1	0	CT	0	0	0	0	0	0	0	0	0	10	0	0	6	0	0	0	0	0	0	0	0	1	0	0	0	0	2	0	0	0	6	0	0	0
1022	28-Dec-21	3:05:00	1	0	1	0	CT	0	0	0	0	0	0	1	0	0	0	0	0	0	0	0	0	0	1	0	0	0	0	1	0	0	0	0	0	0	0	0	0	0	0
1023	28-Dec-21	3:10:00	1	0	1	0	CT	0	0	0	0	0	0	0	0	0	0	0	0	0	0	0	0	0	2	0	1	0	8	1	0	0	0	0	0	0	0	0	0	0	0
1024	28-Dec-21	3:15:00	1	0	1	0	CT	0	0	1	0	0	4	1	0	0	0	0	0	0	1	0	0	0	0	0	89	0	0	0	0	0	0	0	0	0	0	0	0	0	0
1025	28-Dec-21	3:20:00	1	0	1	0	CT	0	0	0	0	0	11	0	0	0	0	0	0	0	2	0	0	0	0	0	79	0	0	0	0	0	0	1	0	0	0	0	0	0	0
1026	28-Dec-21	3:25:00	1	0	1	0	CT	0	0	0	0	0	58	9	0	0	0	0	0	0	1	0	0	0	0	0	38	0	0	0	0	0	0	0	0	0	0	15	0	0	0
1027	28-Dec-21	3:30:00	1	0	1	0	CT	0	0	0	0	0	82	4	0	0	0	0	0	1	0	0	0	0	0	0	7	0	0	1	0	0	0	5	0	2	0	24	0	6	0
1028	28-Dec-21	3:35:00	1	0	1	0	CT	0	0	0	0	0	15	0	0	0	0	20	0	0	16	0	0	0	0	0	0	0	0	0	9	0	0	0	0	1	0	16	0	38	0
1029	28-Dec-21	3:40:00	1	0	1	0	CT	0	0	0	0	0	2	0	0	0	0	38	0	4	1	0	0	12	0	0	0	0	0	1	0	0	0	1	0	1	0	4	27	0	0
1030	28-Dec-21	3:45:00	1	0	1	0	CT	0	0	0	0	0	2	0	0	0	0	0	0	0	5	0	0	1	0	0	0	0	0	6	1	0	0	10	0	0	0	1	28	0	0
1031	28-Dec-21	3:50:00	1	0	1	0	CT	0	0	0	0	0	3	0	0	0	4	0	0	0	16	0	0	1	0	0	0	0	43	0	0	0	0	4	0	10	0	25	0	0	0
1032	28-Dec-21	3:55:00	1	0	1	0	CT	0	0	0	0	0	1	0	0	0	0	0	0	0	5	0	0	0	0	0	0	0	0	0	20	0	0	0	0	0	0	32	0	3	0
1033	28-Dec-21	4:00:00	1	0	1	0	CT	0	0	0	0	0	3	0	0	0	0	0	0	0	0	0	0	0	0	0	0	0	0	20	9	0	0	0	63	0	0	14	0	0	0
1034	28-Dec-21	4:05:00	1	0	1	0	CT	0	0	0	0	3	0	0	0	0	0	0	0	0	0	0	0	1	0	0	0	0	0	0	3	0	0	0	47	0	0	23	8	0	0
1035	28-Dec-21	4:10:00	1	0	1	0	CT	0	0	0	0	0	0	2	0	0	0	0	0	0	0	0	0	2	0	0	0	0	0	0	1	0	0	0	0	0	0	24	0	0	0
1036	28-Dec-21	4:15:00	1	0	1	0	CT	0	0	0	0	1	13	1	0	0	1	0	0	0	0	0	0	9	0	0	0	0	0	0	2	0	0	1	1	0	0	0	0	0	0
1037	28-Dec-21	4:20:00	1	0	1	0	CT	0	0	20	0	0	0	0	0	9	1	0	0	3	0	0	0	1	0	0	0	0	0	0	0	0	0	0	0	25	0	0	0	0	0
1038	28-Dec-21	4:25:00	1	0	1	0	CT	0	0	0	0	0	0	0	0	12	0	0	0	0	0	0	0	0	0	0	0	0	0	0	0	0	0	0	1	22	2	56	0	0	0
1039	28-Dec-21	4:30:00	1	0	1	0	CT	0	0	0	0	0	0	0	0	0	0	0	0	0	1	0	0	0	0	0	0	0	0	0	0	0	0	0	11	84	39	52	0	0	0
1040	28-Dec-21	4:35:00	1	0	1	0	CT	0	0	0	0	1	0	2	0	0	3	0	0	0	1	0	0	0	0	0	0	0	0	0	0	0	0	24	0	36	10	11	0	0	0
1041	28-Dec-21	4:40:00	1	0	1	0	CT	0	0	0	0	1	0	0	0	0	2	0	0	0	1	0	0	1	0	0	0	0	0	0	0	0	0	8	0	63	0	5	0	0	0
1042	28-Dec-21	4:45:00	1	0	1	0	CT	0	0	0	0	7	0	0	0	0	0	0	0	0	12	0	0	1	0	0	0	0	0	8	0	0	0	0	15	28	15	0	0	0	0
1043	28-Dec-21	4:50:00	1	0	1	0	CT	0	0	6	0	0	0	0	73	0	2	0	0	0	7	0	0	12	0	0	0	0	0	0	0	0	0	0	0	0	8	0	1	0	0
1044	28-Dec-21	4:55:00	1	0	1	0	CT	0	0	0	0	0	13	0	25	8	18	5	0	0	0	0	0	8	0	0	0	2	4	0	0	0	0	0	0	0	0	0	0	0	0
1045	28-Dec-21	5:00:00	1	0	1	0	CT	0	0	0	0	3	65	0	0	0	29	1	0	0	0	0	3	0	0	0	0	0	0	0	19	0	0	1	11	0	0	36	0	2	0
1046	28-Dec-21	5:05:00	1	0	1	0	CT	0	0	0	0	1	0	0	0	1	4	0	0	0	0	0	0	3	0	0	0	0	0	0	46	0	0	3	1	0	0	3	2	0	8
1047	28-Dec-21	5:10:00	1	0	1	0	CT	0	0	0	0	0	0	0	8	2	0	0	0	0	0	0	0	0	0	0	0	0	17	0	2	0	0	9	5	0	0	27	1	9	8
1048	28-Dec-21	5:15:00	1	0	1	0	CT	0	0	0	0	0	0	0	65	1	0	14	0	5	0	0	0	0	0	0	0	0	9	0	0	0	0	0	31	0	0	83	12	0	0
1049	28-Dec-21	5:20:00	1	0	1	0	CT	0	0	0	0	0	0	0	0	0	1	0	0	2	1	0	0	2	11	0	0	1	0	0	26	0	0	0	0	0	0	45	0	0	0
1050	28-Dec-21	5:25:00	1	0	1	0	CT	0	0	0	0	0	0	19	0	0	0	2	0	0	0	0	0	0	4	0	0	0	67	0	0	0	0	0	0	0	12	10	0	11	0
1051	28-Dec-21	5:30:00	1	0	1	0	CT	0	0	0	0	0	0	0	0	1	10	14	0	1	1	0	0	0	3	0	23	0	9	0	0	0	0	0	0	0	37	3	0	0	0
1052	28-Dec-21	5:35:00	1	0	1	0	CT	0	0	0	0	0	0	0	0	0	0	63	0	1	2	0	0	1	0	0	60	0	0	0	1	0	0	0	0	0	17	0	0	0	0
1053	28-Dec-21	5:40:00	1	0	1	0	CT	0	0	1	0	0	0	0	0	0	0	19	0	12	1	0	0	2	0	0	0	11	0	0	1	0	0	10	0	0	0	12	0	0	8
1054	28-Dec-21	5:45:00	1	0	1	0	CT	0	0	0	0	8	0	0	0	0	0	0	0	0	14	0	0	9	0	0	0	0	0	0	1	0	0	0	0	0	0	61	0	0	0
1055	28-Dec-21	5:50:00	1	0	1	0	CT	0	0	0	0	63	0	0	0	37	0	5	0	1	8	0	0	0	0	0	0	5	0	0	23	0	0	0	0	0	0	12	8	0	2
1056	28-Dec-21	5:55:00	1	0	1	0	CT	0	0	0	0	0	0	0	2	32	0	0	0	0	3	18	0	0	0	0	0	56	0	0	59	0	0	0	0	34	0	21	40	16	6
1057	28-Dec-21	6:00:00	1	0	1	0	CT	0	0	53	0	8	0	0	0	63	0	1	0	0	35	0	0	0	0	0	26	76	0	0	15	0	0	19	0	1	0	6	37	3	0
1058	28-Dec-21	6:05:00	1	0	1	0	CT	0	0	0	0	0	59	0	3	21	0	1	0	0	0	0	0	0	0	0	0	72	7	0	79	0	0	63	0	0	0	0	0	0	0
1059	28-Dec-21	6:10:00	1	0	1	0	CT	0	0	0	0	0	0	0	3	20	0	1	0	0	0	0	0	0	0	0	0	60	0	0	25	0	36	60	0	0	0	5	0	0	0
1060	28-Dec-21	6:15:00	1	0	1	0	CT	0	0	0	0	0	28	0	1	10	7	0	0	0	0	0	0	0	0	0	3	58	0	0	1	0	0	5	0	0	0	0	0	0	0
1061	28-Dec-21	6:20:00	1	0	1	0	CT	0	0	0	0	0	21	0	1	0	7	0	0	0	1	0	0	54	0	0	0	51	0	0	0	0	1	0	0	0	0	0	0	0	0
1062	28-Dec-21	6:25:00	1	0	1	0	CT	0	0	0	12	0	0	0	1	0	1	1	0	0	1	0	0	0	5	0	13	64	1	0	1	0	3	0	0	0	0	0	0	0	0
1063	28-Dec-21	6:30:00	1	0	1	0	CT	0	0	0	49	1	0	0	2	0	4	0	33	0	25	0	0	0	21	0	0	54	0	0	1	0	0	0	0	0	15	0	0	0	0
1064	28-Dec-21	6:35:00	1	0	1	0	CT	0	0	0	1	39	0	0	0	0	1	9	2	0	27	0	0	0	66	0	0	50	0	0	4	0	0	0	0	0	18	0	0	0	0
1065	28-Dec-21	6:40:00	1	0	1	0	CT	0	0	0	0	0	0	0	0	0	1	3	7	18	94	0	4	0	63	0	0	67	0	0	4	0	9	0	0	0	10	0	0	0	0
1066	28-Dec-21	6:45:00	1	0	1	0	CT	0	0	0	0	6	0	0	0	0	12	2	11	0	81	0	5	0	23	0	33	55	5	22	0	0	6	0	0	0	6	8	0	0	0
1067	28-Dec-21	6:50:00	1	0	1	0	CT	0	0	0	0	8	0	0	14	2	0	3	18	0	74	0	17	0	0	0	40	37	0	35	2	0	4	18	8	15	0	20	0	0	0
1068	28-Dec-21	6:55:00	1	0	1	0	CT	0	0	0	0	0	0	0	0	2	20	1	8	0	85	7	3	14	0	0	64	20	0	0	0	0	0	28	20	0	0	0	0	0	0
1069	28-Dec-21	7:00:00	1	0	1	0	CT	0	0	0	0	0	0	0	0	63	45	63	3	0	70	14	0	6	4	0	11	5	0	6	0	0	0	0	51	49	0	25	0	1	0
1070	28-Dec-21	7:05:00	1	0	1	0	CT	0	0	0	0	0	7	14	0	60	50	61	2	0	39	9	0	29	0	0	68	0	0	0	0	0	0	1	46	9	0	8	0	18	0
1071	28-Dec-21	7:10:00	1	0	1	0	CT	0	0	0	0	0	33	0	0	11	56	1	1	3	0	0	0	34	0	0	55	2	7	3	0	0	0	63	0	26	0	38	10	19	0
1072	28-Dec-21	7:15:00	1	0	1	0	CT	0	0	40	0	3	54	15	37	4	50	0	4	0	0	0	0	32	2	0	25	0	0	85	0	0	0	62	0	21	0	0	0	16	0
1073	28-Dec-21	7:20:00	1	0	1	0	CT	0	0	51	0	24	0	0	0	0	17	0	2	0	0	0	12	24	0	0	63	5	0	0	0	0	0	93	0	9	0	0	1	0	0
1074	28-Dec-21	7:25:00	1	0	1	0	CT	0	0	0	1	1	0	0	0	0	0	19	1	8	0	0	0	40	0	0	0	0	65	0	0	0	0	93	0	0	0	13	1	42	0
1075	28-Dec-21	7:30:00	1	0	1	0	CT	0	0	1	34	0	0	0	0	0	0	4	0	0	0	0	0	0	0	0	0	0	21	0	22	0	0	10	0	0	0	48	0	0	0
1076	28-Dec-21	7:35:00	1	0	1	0	CT	0	0	34	5	2	0	0	0	0	2	3	0	0	0	0	7	0	0	0	3	0	14	15	56	0	10	84	0	23	0	12	0	0	1
1077	28-Dec-21	7:40:00	1	0	1	0	CT	0	0	7	43	0	0	0	0	1	1	3	0	1	0	0	0	0	0	0	0	0	0	8	6	0	0	24	0	0	5	0	0	6	0
1078	28-Dec-21	7:45:00	1	0	1	0	CT	0	0	0	11	0	63	2	0	0	0	26	0	15	0	5	0	0	0	0	0	0	0	50	43	0	0	0	0	0	17	0	1	0	0
1079	28-Dec-21	7:50:00	1	0	1	0	CT	0	0	0	7	0	3	103	1	8	2	8	14	10	63	10	0	8	33	0	0	0	12	2	17	0	0	0	0	0	20	0	0	0	0
1080	28-Dec-21	7:55:00	1	0	1	0	CT	0	0	0	0	1	7	47	0	0	1	0	0	4	70	9	0	0	24	0	11	0	0	0	46	0	0	0	0	0	28	4	8	0	0
1081	28-Dec-21	8:00:00	1	0	1	0	CT	0	0	0	0	20	49	78	0	1	0	7	8	1	27	0	18	0	31	0	53	0	7	20	56	0	0	0	0	0	13	4	0	0	0
1082	28-Dec-21	8:05:00	1	0	1	0	CT	0	1	9	48	24	43	68	16	23	20	40	12	64	100	37	23	2	30	0	35	14	72	68	26	0	7	10	35	30	66	45	44	30	9
1083	28-Dec-21	8:10:00	1	0	1	0	CT	0	1	31	25	55	28	97	19	31	13	57	38	18	47	71	28	23	57	0	68	76	42	53	74	0	20	78	79	45	38	0	0	27	17
1084	28-Dec-21	8:15:00	1	0	1	0	CT	0	1	15	19	88	34	62	19	52	48	84	31	8	86	60	36	82	66	0	47	85	17	52	34	0	80	48	85	72	51	0	6	55	14
1085	28-Dec-21	8:20:00	1	0	1	0	CT	0	1	0	6	57	25	69	34	30	42	60	37	19	62	59	15	39	40	0	26	82	55	23	19	0	40	82	61	46	29	0	0	16	3
1086	28-Dec-21	8:25:00	1	0	1	0	CT	0	1	0	17	63	25	24	26	58	56	68	33	61	38	29	23	66	17	0	59	50	39	0	51	0	12	2	18	61	28	0	0	59	0
1087	28-Dec-21	8:30:00	1	0	1	0	CT	0	1	3	33	72	37	69	25	24	40	20	49	74	52	60	27	12	13	0	32	41	25	0	29	0	0	0	27	37	33	0	54	32	1
1088	28-Dec-21	8:35:00	1	0	1	0	CT	0	1	40	21	52	42	34	5	26	0	40	9	31	34	52	18	20	11	0	58	52	43	0	27	0	0	11	47	38	34	12	6	46	0
1089	28-Dec-21	8:40:00	1	0	1	0	CT	0	1	1	26	31	11	60	30	35	0	0	14	46	15	50	4	0	15	0	70	27	66	16	26	0	0	0	46	52	19	2	3	24	3
1090	28-Dec-21	8:45:00	1	0	1	0	CT	0	1	0	16	83	23	55	27	50	0	0	25	25	25	45	19	0	33	0	78	44	43	61	9	0	0	0	46	31	35	11	13	42	0
1091	28-Dec-21	8:50:00	1	0	1	0	CT	0	1	0	18	75	26	33	21	31	0	24	17	51	52	58	2	0	19	0	34	9	11	0	18	0	0	0	47	26	26	45	34	29	0
1092	28-Dec-21	8:55:00	1	0	1	0	CT	0	1	0	23	58	16	3	33	59	0	1	9	56	25	36	5	0	26	0	45	46	78	3	26	0	0	0	35	39	13	15	12	21	0
1093	28-Dec-21	9:00:00	1	0	1	0	CT	0	1	0	7	8	24	25	34	27	0	65	34	10	33	14	8	0	26	0	27	27	31	0	10	0	0	19	45	46	76	27	0	6	0
1094	28-Dec-21	9:05:00	1	0	1	0	CT	0	1	0	4	63	39	33	23	71	0	25	4	17	29	12	28	0	20	0	18	0	35	4	5	0	0	26	25	46	85	0	0	41	9
1095	28-Dec-21	9:10:00	1	0	1	0	CT	0	1	0	8	45	16	34	28	27	0	0	10	0	0	0	4	0	42	0	11	0	24	0	0	0	0	77	36	34	29	0	5	11	33
1096	28-Dec-21	9:15:00	1	0	1	0	CT	0	1	6	36	52	16	31	48	42	9	0	7	18	12	0	29	0	16	0	44	0	39	7	7	0	0	7	43	44	27	0	45	4	27
1097	28-Dec-21	9:20:00	1	0	1	0	CT	0	1	63	0	42	46	34	84	25	8	26	13	50	1	0	21	1	10	0	36	0	25	6	8	0	0	4	29	50	30	0	0	39	25
1098	28-Dec-21	9:25:00	1	0	1	0	CT	0	1	0	15	46	32	21	54	46	0	33	10	30	8	0	14	0	28	0	37	0	46	3	21	0	0	1	0	26	20	0	0	55	73
1099	28-Dec-21	9:30:00	1	0	1	0	CT	0	1	0	14	37	23	0	28	17	0	0	15	35	21	0	66	0	37	0	36	0	14	0	15	0	13	0	0	41	28	0	0	26	47
1100	28-Dec-21	9:35:00	1	0	1	0	CT	0	1	0	21	24	20	0	12	13	0	26	31	16	24	0	23	6	20	0	69	0	31	0	6	0	12	0	0	35	42	0	0	3	16
1101	28-Dec-21	9:40:00	1	0	1	0	CT	0	1	0	10	31	12	34	67	0	3	13	4	7	34	0	13	2	12	0	21	0	53	0	2	0	25	12	0	35	19	5	0	58	1
1102	28-Dec-21	9:45:00	1	0	1	0	CT	0	1	0	17	28	0	52	29	0	2	0	0	58	7	0	32	0	16	0	42	0	12	70	46	0	18	16	0	33	18	12	5	31	28
1103	28-Dec-21	9:50:00	1	0	1	0	CT	0	1	0	33	32	23	31	57	0	0	0	0	46	0	12	15	0	28	0	31	0	39	43	1	0	12	39	0	39	29	0	35	2	5
1104	28-Dec-21	9:55:00	1	0	1	0	CT	0	1	0	0	30	4	32	52	0	0	0	0	13	54	0	47	0	14	0	4	0	28	0	1	0	0	18	27	49	26	0	0	35	0
1105	28-Dec-21	10:00:00	1	0	1	0	CT	0	1	14	0	23	23	10	47	0	3	0	0	0	29	0	28	0	30	0	0	0	19	0	0	0	0	38	56	34	5	0	0	25	9
1106	28-Dec-21	10:05:00	1	0	1	0	CT	0	1	36	50	28	27	0	37	0	4	0	0	0	5	0	25	17	70	0	59	0	58	1	0	0	0	11	48	48	30	0	0	8	0
1107	28-Dec-21	10:10:00	1	0	1	0	CT	0	1	15	4	20	25	0	21	24	30	0	0	0	27	47	47	57	13	0	49	0	22	0	0	0	0	9	0	37	19	19	0	16	0
1108	28-Dec-21	10:15:00	1	0	1	0	CT	0	1	0	28	2	44	0	9	32	51	0	0	0	18	51	31	15	22	0	2	0	33	0	5	0	0	0	19	50	16	20	0	42	0
1109	28-Dec-21	10:20:00	1	0	1	0	CT	0	1	0	0	1	25	0	12	53	53	33	0	0	24	48	50	33	12	0	0	0	26	50	56	0	0	0	4	25	22	24	0	10	8
1110	28-Dec-21	10:25:00	1	0	1	0	CT	0	1	0	21	0	20	0	18	35	2	80	0	16	41	47	13	25	16	0	23	0	55	38	2	0	0	0	0	24	25	29	0	24	5
1111	28-Dec-21	10:30:00	1	0	1	0	CT	0	1	3	0	0	5	0	29	47	0	0	2	0	0	81	8	0	35	0	38	0	9	2	10	0	0	0	0	28	20	2	6	32	20
1112	28-Dec-21	10:35:00	1	0	1	0	CT	0	1	0	0	0	12	0	15	21	0	1	22	0	5	37	31	1	17	0	43	0	23	0	13	0	0	0	0	27	17	19	5	0	36
1113	28-Dec-21	10:40:00	1	0	1	0	CT	0	1	1	0	0	21	0	31	27	0	8	46	6	18	32	11	58	12	0	43	36	24	3	27	0	5	0	0	33	11	51	14	38	0
1114	28-Dec-21	10:45:00	1	0	1	0	CT	0	1	0	0	0	9	0	45	27	13	0	0	60	31	27	12	39	31	0	35	54	34	3	18	0	5	1	0	46	3	34	2	17	11
1115	28-Dec-21	10:50:00	1	0	1	0	CT	0	1	33	0	0	30	0	28	49	0	49	0	21	1	43	17	17	13	0	25	14	47	1	29	0	7	0	0	36	11	3	1	11	9
1116	28-Dec-21	10:55:00	1	0	1	0	CT	0	1	55	0	0	16	0	22	28	0	8	0	1	0	30	27	29	11	0	25	1	29	1	65	0	0	1	0	45	8	0	8	6	0
1117	28-Dec-21	11:00:00	1	0	1	0	CT	0	1	55	0	0	14	0	50	30	0	65	7	0	42	9	23	24	10	0	63	2	48	0	41	0	0	70	8	36	0	63	2	0	0
1118	28-Dec-21	11:05:00	1	0	1	0	CT	0	1	12	0	2	8	11	12	9	0	39	19	0	52	0	34	0	60	0	64	0	37	6	10	0	0	61	40	25	4	78	4	5	0
1119	28-Dec-21	11:10:00	1	0	1	0	CT	0	1	0	0	4	33	36	7	58	10	0	30	0	44	0	16	0	20	0	73	0	47	4	13	0	9	0	8	13	32	79	0	10	0
1120	28-Dec-21	11:15:00	1	0	1	0	CT	0	1	0	0	29	16	34	24	33	32	18	78	0	9	0	18	0	19	0	39	26	25	22	22	0	8	0	50	35	13	58	0	48	0
1121	28-Dec-21	11:20:00	1	0	1	0	CT	0	1	22	0	3	14	72	15	32	40	0	15	0	12	0	8	0	3	0	49	24	32	13	11	0	47	0	40	20	21	6	0	22	0
1122	28-Dec-21	11:25:00	1	0	1	0	CT	0	1	13	0	0	7	18	27	27	30	0	7	0	41	42	17	0	0	0	26	75	16	69	28	0	27	4	42	16	0	1	31	18	15
1123	28-Dec-21	11:30:00	1	0	1	0	CT	0	1	0	0	0	0	11	13	17	47	51	0	2	39	52	11	0	17	0	7	87	55	11	0	0	1	63	39	15	28	1	3	22	9
1124	28-Dec-21	11:35:00	1	0	1	0	CT	0	1	0	0	0	3	0	43	50	45	12	64	4	32	54	18	6	36	0	0	52	30	4	16	0	23	37	24	36	0	18	0	2	5
1125	28-Dec-21	11:40:00	1	0	1	0	CT	0	1	0	46	8	5	0	25	39	58	0	15	0	33	40	19	0	19	0	0	57	49	79	7	0	0	10	32	34	0	0	0	84	9
1126	28-Dec-21	11:45:00	1	0	1	0	CT	0	1	0	39	0	25	0	43	23	41	62	12	14	11	27	18	0	19	0	0	33	8	64	3	0	0	108	9	7	0	0	20	7	0
1127	28-Dec-21	11:50:00	1	0	1	0	CT	0	1	0	0	49	22	0	75	67	35	30	16	56	24	48	7	0	17	0	10	28	0	54	9	0	0	27	11	0	0	0	35	18	0
1128	28-Dec-21	11:55:00	1	0	1	0	CT	0	1	0	0	35	17	0	75	11	13	23	6	0	27	22	15	19	27	0	56	0	36	9	1	0	0	0	27	9	0	0	23	32	1
1129	28-Dec-21	12:00:00	1	0	1	0	CT	0	1	0	0	55	5	0	23	25	0	0	0	0	22	0	59	29	15	0	58	0	23	1	0	0	0	0	27	98	0	0	13	11	9
1130	28-Dec-21	12:05:00	1	0	1	0	CT	0	1	0	0	40	10	0	29	23	0	4	0	0	14	0	23	14	22	0	34	0	5	0	0	0	0	0	20	29	0	0	64	31	0
1131	28-Dec-21	12:10:00	1	0	1	0	CT	0	1	0	0	6	12	0	26	9	0	63	0	0	2	0	23	18	21	0	25	0	2	5	0	0	20	0	35	56	0	0	7	7	0
1132	28-Dec-21	12:15:00	1	0	1	0	CT	0	1	0	0	0	19	17	3	67	0	13	0	0	1	0	14	16	18	0	7	0	0	23	0	0	24	18	14	9	0	47	0	44	16
1133	28-Dec-21	12:20:00	1	0	1	0	CT	0	1	2	0	0	26	0	19	34	0	72	4	5	0	0	10	17	52	0	0	0	0	38	0	0	0	0	7	24	0	61	21	14	18
1134	28-Dec-21	12:25:00	1	0	1	0	CT	0	1	52	0	5	0	54	24	1	0	21	1	2	39	0	8	2	26	0	0	36	0	20	0	0	0	6	41	3	0	74	24	24	0
1135	28-Dec-21	12:30:00	1	0	1	0	CT	0	1	11	0	0	0	61	51	0	0	42	62	0	18	5	12	2	17	0	7	68	0	39	0	0	0	67	33	3	0	72	0	0	0
1136	28-Dec-21	12:35:00	1	0	1	0	CT	0	1	0	0	20	0	40	74	1	10	4	64	23	78	0	28	0	22	0	16	55	0	14	0	0	0	0	35	0	0	41	0	29	0
1137	28-Dec-21	12:40:00	1	0	1	0	CT	0	1	0	0	16	0	16	64	0	17	0	2	1	77	0	1	0	0	0	20	78	0	2	0	0	0	0	11	0	0	2	0	13	0
1138	28-Dec-21	12:45:00	1	0	1	0	CT	0	1	2	20	44	0	0	40	17	0	0	17	0	33	0	0	0	0	0	45	38	0	3	25	0	0	0	9	0	10	33	0	16	0
1139	28-Dec-21	12:50:00	1	0	1	0	CT	0	1	0	70	42	0	0	38	23	0	0	16	0	30	0	12	0	4	0	18	0	0	0	38	0	1	1	0	0	19	40	0	6	0
1140	28-Dec-21	12:55:00	1	0	1	0	CT	0	1	0	63	25	0	0	66	19	0	0	14	0	19	0	2	0	17	0	30	0	0	11	20	0	9	8	0	0	37	14	0	0	0
1141	28-Dec-21	13:00:00	1	0	1	0	CT	0	1	0	16	27	6	0	50	14	0	7	5	0	0	0	18	23	43	0	0	0	0	39	4	0	0	55	0	0	20	35	0	0	0
1142	28-Dec-21	13:05:00	1	0	1	0	CT	0	1	27	0	23	4	0	12	20	0	0	0	0	0	0	35	55	41	0	3	0	67	37	15	0	23	10	0	0	9	21	0	23	0
1143	28-Dec-21	13:10:00	1	0	1	0	CT	0	1	0	0	0	11	0	12	22	6	0	2	0	0	0	10	58	33	0	11	0	22	7	0	0	12	0	4	0	31	61	0	38	10
1144	28-Dec-21	13:15:00	1	0	1	0	CT	0	1	0	0	0	36	0	38	18	0	0	2	23	0	0	39	22	20	0	0	0	23	0	6	0	0	0	16	0	4	61	0	0	2
1145	28-Dec-21	13:20:00	1	0	1	0	CT	0	1	0	0	0	29	0	41	4	0	0	0	0	0	5	7	25	31	0	0	9	21	0	17	0	0	0	6	0	17	49	0	26	0
1146	28-Dec-21	13:25:00	1	0	1	0	CT	0	1	0	0	0	9	0	3	6	18	0	1	29	0	19	7	2	22	0	0	12	49	4	0	0	0	0	20	0	10	43	5	17	24
1147	28-Dec-21	13:30:00	1	0	1	0	CT	0	1	0	0	0	0	0	44	0	10	5	1	29	0	82	26	0	27	0	63	0	20	60	0	0	0	0	5	0	0	1	10	34	28
1148	28-Dec-21	13:35:00	1	0	1	0	CT	0	1	0	0	6	0	61	43	0	65	0	1	28	0	30	16	0	38	0	54	0	0	30	0	0	0	0	22	8	21	24	21	14	10
1149	28-Dec-21	13:40:00	1	0	1	0	CT	0	1	0	0	1	0	29	19	0	63	0	0	34	0	0	28	13	26	0	90	0	0	24	0	0	0	1	0	0	0	13	8	25	0
1150	28-Dec-21	13:45:00	1	0	1	0	CT	0	1	0	0	0	0	32	24	0	38	13	0	1	0	0	45	16	0	0	48	0	0	7	0	0	16	16	0	0	0	0	48	14	1
1151	28-Dec-21	13:50:00	1	0	1	0	CT	0	1	0	0	0	0	28	17	0	41	40	45	0	36	0	20	2	14	0	33	0	2	0	0	0	4	51	0	0	0	0	23	14	0
1152	28-Dec-21	13:55:00	1	0	1	0	CT	0	1	0	0	3	0	26	28	0	0	13	15	0	39	0	0	0	16	0	23	31	0	0	0	0	25	19	0	0	0	0	11	15	0
1153	28-Dec-21	14:00:00	1	0	1	0	CT	0	1	0	0	0	0	0	0	3	0	0	3	0	5	0	0	0	26	0	0	38	0	18	0	0	0	0	0	0	0	0	17	18	0
1154	28-Dec-21	14:05:00	1	0	1	0	CT	0	1	0	0	0	0	1	2	27	0	0	13	0	3	0	6	0	10	0	0	68	0	14	0	0	0	6	0	0	0	39	0	7	0
1155	28-Dec-21	14:10:00	1	0	1	0	CT	0	1	0	5	17	7	1	19	5	0	0	40	0	0	0	12	0	4	0	0	16	0	17	0	0	0	7	0	0	0	46	0	9	0
1156	28-Dec-21	14:15:00	1	0	1	0	CT	0	1	0	24	2	63	1	16	45	0	0	15	0	0	0	12	0	0	0	0	0	0	7	0	0	0	63	0	0	0	0	3	35	0
1157	28-Dec-21	14:20:00	1	0	1	0	CT	0	1	0	0	2	4	0	0	75	0	8	7	3	0	0	3	0	6	0	0	0	0	6	13	0	0	13	0	0	0	0	19	14	0
1158	28-Dec-21	14:25:00	1	0	1	0	CT	0	1	0	14	4	0	13	0	49	0	0	3	0	0	0	0	0	4	0	0	0	0	10	9	0	0	26	0	3	0	0	0	29	0
1159	28-Dec-21	14:30:00	1	0	1	0	CT	0	1	0	0	2	2	6	0	69	0	0	0	0	0	0	0	0	23	0	0	0	2	29	30	0	0	81	0	16	0	0	0	36	0
1160	28-Dec-21	14:35:00	1	0	1	0	CT	0	1	0	0	5	6	0	1	11	13	16	0	0	0	0	0	6	20	0	0	0	0	1	13	0	0	59	0	57	23	51	0	29	11
1161	28-Dec-21	14:40:00	1	0	1	0	CT	0	1	0	0	0	7	0	0	0	43	0	0	1	0	1	0	1	39	0	0	0	7	2	0	0	0	0	0	62	0	61	0	17	12
1162	28-Dec-21	14:45:00	1	0	1	0	CT	0	1	0	0	1	45	0	20	4	2	0	0	4	0	0	0	0	33	0	3	0	20	0	0	0	0	0	3	30	8	24	0	0	0
1163	28-Dec-21	14:50:00	1	0	1	0	CT	0	1	0	0	0	29	0	38	2	33	0	1	0	0	10	1	0	17	0	37	0	3	0	0	0	3	0	10	36	30	23	0	0	0
1164	28-Dec-21	14:55:00	1	0	1	0	CT	0	1	0	0	0	0	0	27	0	49	0	0	0	7	38	5	0	41	0	28	12	0	29	0	0	0	0	20	31	38	42	0	1	0
1165	28-Dec-21	15:00:00	1	0	1	0	CT	0	1	0	0	0	0	0	20	0	57	0	0	0	5	42	3	1	41	0	68	8	0	23	0	0	0	4	13	29	78	16	4	0	0
1166	28-Dec-21	15:05:00	1	0	1	0	CT	0	1	0	0	0	0	0	50	0	65	9	0	0	14	21	63	21	20	0	27	0	0	22	0	0	0	3	22	16	33	44	33	0	0
1167	28-Dec-21	15:10:00	1	0	1	0	CT	0	1	5	0	0	0	0	43	0	25	28	0	0	4	0	27	0	0	0	4	0	0	3	0	0	0	2	51	6	17	0	77	0	0
1168	28-Dec-21	15:15:00	1	0	1	0	CT	0	1	0	0	0	0	0	44	0	42	27	0	0	0	0	25	0	6	0	51	0	0	16	0	0	0	63	29	20	38	0	13	0	0
1169	28-Dec-21	15:20:00	1	0	1	0	CT	0	1	0	0	0	0	7	42	0	34	0	0	0	0	0	22	0	6	0	47	1	0	6	3	0	0	13	15	0	20	16	0	0	0
1170	28-Dec-21	15:25:00	1	0	1	0	CT	0	1	54	0	0	0	84	21	0	6	0	7	0	17	0	26	8	24	0	53	2	0	0	9	0	0	0	1	0	7	0	0	0	6
1171	28-Dec-21	15:30:00	1	0	1	0	CT	0	1	63	0	18	0	76	30	0	0	0	0	0	0	0	23	0	40	0	11	0	0	2	8	0	0	3	11	0	18	31	0	0	26
1172	28-Dec-21	15:35:00	1	0	1	0	CT	0	1	9	0	13	0	0	8	0	0	0	0	0	0	0	25	0	5	0	18	1	0	3	83	0	0	0	5	0	0	75	0	0	0
1173	28-Dec-21	15:40:00	1	0	1	0	CT	0	1	0	0	11	0	0	0	30	0	0	0	0	1	24	31	0	0	0	7	16	0	0	37	0	0	0	1	0	0	87	1	0	0
1174	28-Dec-21	15:45:00	1	0	1	0	CT	0	1	0	0	13	0	0	2	41	0	0	0	0	0	50	22	1	7	0	23	24	0	0	20	0	23	0	7	0	0	44	0	0	0
1175	28-Dec-21	15:50:00	1	0	1	0	CT	0	1	0	0	0	0	0	28	16	0	0	0	33	0	44	7	0	2	0	32	96	0	0	44	0	10	0	24	0	0	49	0	0	0
1176	28-Dec-21	15:55:00	1	0	1	0	CT	0	1	0	0	3	7	0	50	37	0	0	0	20	0	6	0	0	19	0	19	28	0	25	15	0	12	0	10	0	0	58	3	2	0
1177	28-Dec-21	16:00:00	1	0	1	0	CT	0	1	8	0	2	55	0	7	26	0	0	0	5	17	0	0	5	41	0	39	0	0	95	16	0	72	0	0	0	0	54	48	1	7
1178	28-Dec-21	16:05:00	1	0	1	0	CT	0	1	0	0	0	0	0	45	29	10	0	0	0	7	0	0	9	44	0	40	0	0	35	0	0	9	0	21	0	0	15	24	0	0
1179	28-Dec-21	16:10:00	1	0	1	0	CT	0	1	0	0	2	0	0	49	5	1	0	0	30	0	0	8	0	73	0	3	0	0	18	2	0	0	2	1	0	0	43	14	0	0
1180	28-Dec-21	16:15:00	1	0	1	0	CT	0	1	0	0	0	29	0	49	13	0	0	0	0	0	0	0	0	19	0	0	0	0	0	1	0	0	4	5	0	0	31	0	0	0
1181	28-Dec-21	16:20:00	1	0	1	0	CT	0	1	0	0	0	36	5	36	29	0	0	0	0	0	0	10	0	2	0	1	0	0	0	1	0	0	16	6	0	0	3	0	0	0
1182	28-Dec-21	16:25:00	1	0	1	0	CT	0	1	0	0	0	20	0	41	7	10	5	0	0	0	0	4	4	9	0	5	0	0	37	0	0	0	103	8	0	0	0	0	0	0
1183	28-Dec-21	16:30:00	1	0	1	0	CT	0	1	0	0	0	0	0	32	0	2	0	63	0	13	0	4	3	7	0	0	0	1	93	2	0	0	60	15	0	0	4	0	0	20
1184	28-Dec-21	16:35:00	1	0	1	0	CT	0	1	0	0	0	0	0	26	0	7	0	5	0	0	0	3	0	80	0	0	0	7	14	0	0	0	22	31	4	0	6	0	10	10
1185	28-Dec-21	16:40:00	1	0	1	0	CT	0	1	0	0	0	0	0	56	0	0	0	41	21	0	0	8	1	22	0	0	0	23	0	0	0	0	18	26	1	0	0	0	13	49
1186	28-Dec-21	16:45:00	1	0	1	0	CT	0	1	0	0	0	0	0	12	0	0	2	52	29	43	0	4	1	39	0	44	15	29	0	0	0	0	29	0	66	0	39	0	43	13
1187	28-Dec-21	16:50:00	1	0	1	0	CT	0	1	0	0	2	0	0	8	0	0	7	15	51	24	0	0	5	10	0	68	64	24	0	0	0	0	32	6	0	0	72	0	45	2
1188	28-Dec-21	16:55:00	1	0	1	0	CT	0	1	0	0	37	0	1	5	0	0	63	4	49	36	0	0	0	17	0	26	27	23	12	0	0	0	0	3	27	0	88	0	18	0
1189	28-Dec-21	17:00:00	1	0	1	0	CT	0	1	0	0	0	0	13	0	0	0	54	0	63	93	0	0	0	5	0	39	46	6	12	0	0	0	0	13	22	0	46	0	26	0
1190	28-Dec-21	17:05:00	1	0	1	0	CT	0	1	0	0	8	0	0	2	0	0	0	0	0	52	0	0	0	8	0	0	2	0	9	0	0	0	0	12	27	0	32	0	16	0
1191	28-Dec-21	17:10:00	1	0	1	0	CT	0	1	15	19	14	22	0	12	0	0	0	0	0	64	0	0	0	11	0	44	8	3	8	0	0	0	0	35	0	16	17	0	14	0
1192	28-Dec-21	17:15:00	1	0	1	0	CT	0	1	72	37	0	1	0	19	0	0	0	0	0	15	0	0	3	0	0	5	0	0	66	0	0	0	0	15	0	45	31	0	0	28
1193	28-Dec-21	17:20:00	1	0	1	0	CT	0	1	0	82	0	0	0	40	0	0	0	0	0	0	0	0	9	0	0	0	0	0	14	0	0	0	0	2	0	30	43	43	5	14
1194	28-Dec-21	17:25:00	1	0	1	0	CT	0	1	0	25	0	0	0	23	0	42	0	0	0	0	0	0	32	0	0	0	0	0	2	2	0	0	0	8	0	27	17	19	15	3
1195	28-Dec-21	17:30:00	1	0	1	0	CT	0	1	46	0	0	0	0	31	0	45	0	0	0	4	0	0	1	0	0	0	0	0	5	30	0	0	0	27	0	8	0	53	67	16
1196	28-Dec-21	17:35:00	1	0	1	0	CT	0	1	1	0	4	0	0	73	0	0	0	0	0	1	0	14	0	25	0	0	0	0	0	38	0	0	0	14	0	45	0	25	5	0
1197	28-Dec-21	17:40:00	1	0	1	0	CT	0	1	0	0	3	0	1	55	12	0	0	1	0	0	0	11	0	3	0	0	0	0	0	59	0	0	0	8	0	18	0	0	0	0
1198	28-Dec-21	17:45:00	1	0	1	0	CT	0	1	5	0	0	0	15	13	0	0	0	30	0	0	0	33	24	61	0	1	1	0	0	63	0	0	0	11	0	15	0	12	0	0
1199	28-Dec-21	17:50:00	1	0	1	0	CT	0	1	0	1	15	50	0	22	0	0	0	25	0	0	0	0	23	44	0	32	0	0	0	10	0	0	0	16	0	6	28	0	4	0
1200	28-Dec-21	17:55:00	1	0	1	0	CT	0	1	0	38	28	23	0	0	0	0	1	31	0	0	0	16	62	5	0	33	0	0	0	63	0	0	0	19	0	0	44	1	0	0
1201	28-Dec-21	18:00:00	1	0	1	0	CT	0	1	0	12	56	0	17	0	0	0	0	0	0	0	0	20	20	10	0	27	0	2	12	15	0	0	27	14	0	0	0	0	0	0
1202	28-Dec-21	18:05:00	1	0	1	0	CT	0	1	0	12	22	0	0	0	0	0	8	7	0	0	0	0	49	0	0	14	0	0	61	14	0	0	47	2	0	0	0	0	8	0
1203	28-Dec-21	18:10:00	1	0	1	0	CT	0	1	0	26	68	0	0	0	0	0	38	1	0	0	10	0	18	0	0	31	7	45	68	0	0	0	98	0	0	0	0	0	3	0
1204	28-Dec-21	18:15:00	1	0	1	0	CT	0	1	0	40	42	0	0	4	0	0	16	0	0	7	57	0	9	0	0	5	9	4	20	1	0	0	50	5	0	0	0	0	0	0
1205	28-Dec-21	18:20:00	1	0	1	0	CT	0	1	0	10	42	0	0	0	5	20	0	0	0	55	33	0	14	45	0	0	35	8	4	0	0	0	9	7	33	0	0	0	0	0
1206	28-Dec-21	18:25:00	1	0	1	0	CT	0	1	3	26	9	0	0	0	65	24	0	0	0	18	52	0	26	1	0	0	30	15	33	0	0	0	0	14	96	0	0	0	0	0
1207	28-Dec-21	18:30:00	1	0	1	0	CT	0	1	0	3	0	0	0	0	17	5	0	0	0	0	34	0	2	21	0	9	78	2	5	0	0	0	0	24	87	0	0	0	0	0
1208	28-Dec-21	18:35:00	1	0	1	0	CT	0	1	0	16	0	0	0	32	63	0	0	0	2	0	0	9	0	32	0	42	8	0	8	1	0	0	0	52	19	0	0	0	0	0
1209	28-Dec-21	18:40:00	1	0	1	0	CT	0	1	0	0	0	0	0	38	46	0	0	0	0	0	0	0	0	52	0	17	0	0	2	0	0	10	0	15	30	0	0	0	0	0
1210	28-Dec-21	18:45:00	1	0	1	0	CT	0	1	4	0	0	0	0	69	16	0	0	0	0	0	0	0	0	33	0	39	0	0	0	13	0	15	0	34	35	0	0	0	0	5
1211	28-Dec-21	18:50:00	1	0	1	0	CT	0	1	50	0	0	70	0	0	0	0	0	1	12	0	0	0	0	0	0	50	0	4	1	48	0	68	0	10	0	5	0	0	0	77
1212	28-Dec-21	18:55:00	1	0	1	0	CT	0	1	15	0	0	24	11	27	0	0	0	1	0	0	0	0	0	1	0	17	9	1	0	61	0	2	17	1	0	18	13	43	0	23
1213	28-Dec-21	19:00:00	1	0	1	0	CT	0	1	0	0	0	6	53	20	0	0	0	0	0	0	0	0	0	7	0	44	16	0	0	0	0	0	1	0	0	40	32	15	0	0
1214	28-Dec-21	19:05:00	1	0	1	0	CT	0	1	0	0	0	1	50	37	4	0	0	0	11	0	0	1	0	11	0	10	1	0	0	36	0	0	0	0	0	0	9	8	0	17
1215	28-Dec-21	19:10:00	1	0	1	0	CT	0	1	0	0	0	7	24	24	0	5	35	0	12	0	0	0	0	3	0	16	27	0	1	14	0	0	9	0	0	0	8	0	0	11
1216	28-Dec-21	19:15:00	1	0	1	0	CT	0	1	0	0	20	10	0	32	1	0	17	0	0	32	0	0	36	4	0	13	56	0	18	2	0	0	0	0	0	0	79	0	0	0
1217	28-Dec-21	19:20:00	1	0	1	0	CT	0	1	0	0	46	19	0	30	5	0	13	0	0	40	0	12	10	42	0	38	24	0	43	6	0	0	0	13	0	0	47	0	24	0
1218	28-Dec-21	19:25:00	1	0	1	0	CT	0	1	0	0	35	0	0	31	13	0	0	0	14	96	0	2	35	2	0	0	15	0	7	1	0	0	0	7	0	0	3	0	26	0
1219	28-Dec-21	19:30:00	1	0	1	0	CT	0	1	0	10	5	0	0	1	9	20	9	0	0	75	30	20	10	5	0	28	2	0	1	1	0	0	0	39	0	5	0	0	23	3
1220	28-Dec-21	19:35:00	1	0	1	0	CT	0	1	0	29	0	0	0	0	0	67	0	7	0	40	47	14	0	18	0	2	0	0	3	0	0	0	4	49	14	0	0	0	7	0
1221	28-Dec-21	19:40:00	1	0	1	0	CT	0	1	4	4	0	4	0	2	8	33	0	5	0	39	19	5	0	19	0	30	0	0	3	1	0	0	31	23	0	0	0	0	0	0
1222	28-Dec-21	19:45:00	1	0	1	0	CT	0	1	11	0	0	17	0	2	0	10	0	3	2	28	0	25	0	5	0	42	0	0	3	6	0	0	28	3	0	17	78	0	0	14
1223	28-Dec-21	19:50:00	1	0	1	0	CT	0	1	0	0	0	18	0	0	6	0	18	70	49	2	0	41	19	9	0	14	0	35	3	34	0	0	93	2	0	41	51	14	0	26
1224	28-Dec-21	19:55:00	1	0	1	0	CT	0	1	66	0	0	23	0	0	32	0	63	24	25	4	0	28	54	4	0	14	0	7	18	13	0	0	32	45	11	75	12	32	0	24
1225	28-Dec-21	20:00:00	1	0	1	0	CT	0	1	0	0	0	5	0	0	29	0	53	11	0	0	0	6	8	9	0	12	0	9	58	3	0	0	13	88	46	14	3	7	0	21
1226	28-Dec-21	20:05:00	1	0	1	0	CT	0	1	1	0	0	0	58	0	3	0	0	0	0	1	0	0	7	0	0	4	5	1	2	6	0	51	4	10	0	7	0	51	0	0
1227	28-Dec-21	20:10:00	1	0	1	0	CT	0	0	36	54	45	30	30	0	19	3	42	0	0	53	0	0	0	0	0	49	62	0	0	3	0	39	16	46	0	0	0	0	0	0
1228	28-Dec-21	20:15:00	1	0	1	0	CT	0	0	0	73	49	11	67	0	25	0	93	0	6	44	13	0	0	0	0	52	88	0	0	0	0	57	50	0	14	1	0	0	0	0
1229	28-Dec-21	20:20:00	1	0	1	0	CT	0	0	23	21	44	5	83	0	27	0	45	0	0	35	63	0	28	0	0	67	76	21	0	26	0	32	44	0	49	0	0	0	0	17
1230	28-Dec-21	20:25:00	1	0	1	0	CT	0	0	28	70	42	48	44	0	25	22	11	0	0	48	46	5	42	0	0	11	69	22	6	56	0	26	65	10	67	0	0	0	0	0
1231	28-Dec-21	20:30:00	1	0	1	0	CT	0	0	35	16	49	36	42	0	3	7	29	0	0	0	52	0	11	0	0	53	98	22	27	41	0	45	46	0	32	0	14	0	0	5
1232	28-Dec-21	20:35:00	1	0	1	0	CT	0	0	11	35	73	8	84	8	22	12	2	0	37	6	56	0	11	0	0	30	81	31	8	63	0	16	20	30	24	1	12	0	0	28
1233	28-Dec-21	20:40:00	1	0	1	0	CT	0	0	0	26	33	36	47	51	16	64	13	0	65	42	52	0	39	0	0	32	70	26	19	71	0	0	44	2	44	0	42	51	35	46
1234	28-Dec-21	20:45:00	1	0	1	0	CT	0	0	3	12	30	9	53	9	7	40	47	0	48	38	46	0	16	34	0	70	71	39	43	72	0	0	57	38	6	1	18	0	35	17
1235	28-Dec-21	20:50:00	1	0	1	0	CT	0	0	26	37	32	32	53	24	32	62	38	0	36	8	28	0	0	66	0	68	74	44	51	63	0	0	63	8	31	2	4	0	44	24
1236	28-Dec-21	20:55:00	1	0	1	0	CT	0	0	45	10	47	24	27	40	20	62	35	0	0	0	55	2	0	42	0	48	76	11	0	46	0	0	30	29	10	16	2	53	27	0
1237	28-Dec-21	21:00:00	1	0	1	0	CT	0	0	26	19	30	1	79	14	9	19	4	0	0	0	54	2	0	35	0	59	64	34	22	64	0	0	63	20	32	63	7	28	0	0
1238	28-Dec-21	21:05:00	1	0	1	0	CT	0	0	2	33	20	0	33	0	2	61	7	0	42	54	34	0	28	7	0	34	87	24	3	84	0	4	79	54	34	10	8	8	17	12
1239	28-Dec-21	21:10:00	1	0	1	0	CT	0	0	14	36	80	33	60	32	0	17	17	11	54	74	68	17	5	0	0	41	54	30	52	27	0	6	40	49	31	73	79	0	15	9
1240	28-Dec-21	21:15:00	1	0	1	0	CT	0	0	39	32	37	22	66	36	4	65	43	0	43	1	68	0	49	0	0	63	74	36	12	51	0	31	68	4	23	42	47	0	0	15
1241	28-Dec-21	21:20:00	1	0	1	0	CT	0	0	13	46	50	19	60	29	21	32	76	18	52	12	52	0	16	4	0	24	72	24	70	27	0	24	18	0	85	0	11	0	0	0
1242	28-Dec-21	21:25:00	1	0	1	0	CT	0	0	12	40	44	10	45	4	15	51	28	16	48	27	49	0	12	35	0	27	84	55	6	33	0	0	0	8	31	2	20	62	0	5
1243	28-Dec-21	21:30:00	1	0	1	0	CT	0	0	18	37	62	8	73	18	17	52	32	7	18	50	55	24	0	37	0	58	83	15	10	0	0	0	27	18	33	8	0	65	22	0
1244	28-Dec-21	21:35:00	1	0	1	0	CT	0	0	0	9	29	15	71	62	24	62	0	0	0	17	66	2	3	13	0	59	65	11	41	27	0	31	83	22	11	28	86	36	3	11
1245	28-Dec-21	21:40:00	1	0	1	0	CT	0	0	10	8	53	8	34	9	16	0	36	5	56	9	28	12	23	0	0	54	48	37	28	7	0	35	24	16	38	16	99	0	8	23
1246	28-Dec-21	21:45:00	1	0	1	0	CT	0	0	1	0	75	23	59	27	36	0	39	18	24	5	52	0	38	43	0	71	51	26	17	0	0	38	21	0	31	25	26	0	21	20
1247	28-Dec-21	21:50:00	1	0	1	0	CT	0	0	2	23	50	13	50	13	26	0	43	38	58	16	51	0	32	30	0	45	74	39	63	0	0	5	17	36	54	0	60	0	17	22
1248	28-Dec-21	21:55:00	1	0	1	0	CT	0	0	62	46	42	22	29	37	48	0	40	0	5	39	48	29	12	0	0	37	62	2	22	11	0	0	3	37	0	13	7	0	4	24
1249	28-Dec-21	22:00:00	1	0	1	0	CT	0	0	20	32	32	1	72	27	26	0	0	0	0	14	48	9	0	17	0	37	40	8	36	11	0	0	34	35	53	16	1	0	14	0
1250	28-Dec-21	22:05:00	1	0	1	0	CT	0	0	6	0	36	39	50	64	23	0	0	7	32	63	45	20	1	32	0	34	63	0	32	19	0	16	46	30	33	25	39	0	5	8
1251	28-Dec-21	22:10:00	1	0	1	0	CT	0	0	25	19	79	23	38	36	34	5	0	0	42	18	51	63	32	0	0	39	67	54	51	65	0	15	75	19	40	18	41	0	0	16
1252	28-Dec-21	22:15:00	1	0	1	0	CT	0	0	27	31	65	7	35	38	32	25	0	23	2	9	22	40	27	26	0	69	53	79	17	32	0	55	63	29	38	19	23	0	4	0
1253	28-Dec-21	22:20:00	1	0	1	0	CT	0	0	31	0	24	22	34	7	26	27	45	9	0	22	56	15	20	35	0	49	76	27	52	39	0	13	9	15	30	23	55	0	11	13
1254	28-Dec-21	22:25:00	1	0	1	0	CT	0	0	14	0	19	43	45	39	49	2	40	0	6	14	36	22	24	36	0	58	43	46	36	74	0	0	37	0	31	4	1	0	39	1
1255	28-Dec-21	22:30:00	1	0	1	0	CT	0	0	5	13	54	3	31	37	50	0	63	4	0	0	35	21	65	13	0	14	92	33	51	69	0	0	107	55	31	70	39	0	24	18
1256	28-Dec-21	22:35:00	1	0	1	0	CT	0	0	7	24	30	30	30	28	20	2	0	0	0	0	45	24	16	17	0	45	48	16	4	50	0	0	71	51	37	19	9	0	0	30
1257	28-Dec-21	22:40:00	1	0	1	0	CT	0	0	0	0	15	24	55	23	35	0	4	0	1	0	60	18	51	11	0	55	78	13	37	49	0	13	13	0	26	0	0	25	0	3
1258	28-Dec-21	22:45:00	1	0	1	0	CT	0	0	15	41	35	3	15	37	29	1	0	0	0	20	58	4	7	0	0	36	94	38	43	13	0	41	1	8	40	0	11	0	0	0
1259	28-Dec-21	22:50:00	1	0	1	0	CT	0	0	3	16	30	33	52	27	16	1	44	0	0	64	43	70	3	8	0	6	76	42	3	32	0	15	41	60	35	25	46	0	0	13
1260	28-Dec-21	22:55:00	1	0	1	0	CT	0	0	11	0	43	35	70	41	54	0	5	0	0	47	31	10	65	52	0	64	40	13	7	19	0	24	88	20	34	11	41	0	0	16
1261	28-Dec-21	23:00:00	1	0	1	0	CT	0	0	4	0	29	12	66	38	34	22	0	0	31	21	35	29	0	30	0	47	85	23	0	31	0	21	50	6	40	24	32	0	0	15
1262	28-Dec-21	23:05:00	1	0	1	0	CT	0	0	7	0	30	0	37	61	52	31	4	15	22	18	49	8	47	7	0	45	69	31	6	77	0	49	9	13	39	8	17	0	0	5
1263	28-Dec-21	23:10:00	1	0	1	0	CT	0	0	26	0	58	9	55	38	38	40	67	6	22	29	77	25	33	2	0	41	46	35	57	16	0	36	53	34	64	20	0	2	29	4
1264	28-Dec-21	23:15:00	1	0	1	0	CT	0	0	0	17	40	40	60	35	13	15	0	64	4	64	37	23	26	50	0	46	67	48	31	41	0	18	51	0	32	6	0	0	41	9
1265	28-Dec-21	23:20:00	1	0	1	0	CT	0	0	3	0	8	28	57	34	32	58	0	47	11	0	57	26	49	39	0	13	64	37	41	35	0	0	72	11	39	27	54	0	3	12
1266	28-Dec-21	23:25:00	1	0	1	0	CT	0	0	20	0	31	76	47	44	23	27	0	0	29	26	41	9	24	28	0	52	82	43	1	73	0	21	63	34	48	31	53	0	0	33
1267	28-Dec-21	23:30:00	1	0	1	0	CT	0	0	42	0	15	69	30	13	32	11	0	21	34	21	63	16	21	31	0	39	69	27	13	35	0	25	5	37	23	0	17	0	0	11
1268	28-Dec-21	23:35:00	1	0	1	0	CT	0	0	0	0	55	7	94	17	15	48	0	66	36	15	28	80	33	21	0	45	86	12	35	54	0	0	34	36	32	22	5	0	38	13
1269	28-Dec-21	23:40:00	1	0	1	0	CT	0	0	1	0	50	0	62	3	27	58	0	21	44	17	83	12	90	28	0	44	83	48	36	4	0	9	49	63	27	27	0	0	2	56
1270	28-Dec-21	23:45:00	1	0	1	0	CT	0	0	12	0	44	9	74	0	29	50	0	38	35	49	50	0	29	72	0	76	96	18	60	6	0	71	33	7	74	37	9	0	27	37
1271	28-Dec-21	23:50:00	1	0	1	0	CT	0	0	0	0	89	1	27	0	19	47	0	1	11	48	56	0	14	40	0	51	94	53	27	18	0	72	6	2	62	20	61	0	50	24
1272	28-Dec-21	23:55:00	1	0	1	0	CT	0	0	3	0	34	0	64	0	29	4	0	33	0	6	46	0	11	40	0	76	65	50	26	5	0	7	0	0	44	13	10	0	0	11
1273	29-Dec-21	0:00:00	1	0	1	0	CT	0	0	0	0	29	49	52	0	18	5	0	39	0	13	33	0	22	27	0	75	74	17	4	0	0	23	0	26	85	22	49	0	1	10
1274	29-Dec-21	0:05:00	1	0	1	0	CT	0	0	0	0	45	0	75	0	52	23	0	30	0	32	59	0	0	58	0	54	71	46	55	0	0	11	0	34	67	40	39	0	17	29
1275	29-Dec-21	0:10:00	1	0	1	0	CT	0	0	0	0	40	3	68	0	34	0	0	38	0	75	48	0	0	45	0	72	89	24	35	0	0	50	0	35	42	10	35	2	0	15
1276	29-Dec-21	0:15:00	1	0	1	0	CT	0	0	7	0	39	1	50	0	18	0	0	39	0	48	46	0	32	19	0	41	82	0	30	1	0	0	0	8	54	21	0	0	0	30
1277	29-Dec-21	0:20:00	1	0	1	0	CT	0	0	0	0	24	0	62	0	51	0	0	32	0	32	43	0	41	1	0	41	101	0	16	2	0	0	3	0	12	82	16	0	0	6
1278	29-Dec-21	0:25:00	1	0	1	0	CT	0	0	1	0	57	0	55	0	48	0	0	28	1	76	64	0	32	8	0	73	92	0	82	0	0	0	0	0	0	44	57	0	0	42
1279	29-Dec-21	0:30:00	1	0	1	0	CT	0	0	0	0	80	0	79	0	29	0	0	27	0	29	41	0	12	59	0	55	66	0	14	0	0	7	8	0	0	27	82	0	0	25
1280	29-Dec-21	0:35:00	1	0	1	0	CT	0	0	8	0	55	0	85	0	52	0	0	18	10	0	48	0	11	61	0	31	88	0	0	0	0	40	60	0	0	30	10	0	0	30
1281	29-Dec-21	0:40:00	1	0	1	0	CT	0	0	0	0	43	0	77	0	65	0	0	5	4	0	50	0	39	53	0	47	65	0	0	0	0	23	20	0	0	13	15	0	7	0
1282	29-Dec-21	0:45:00	1	0	1	0	CT	0	0	1	0	48	0	47	0	81	1	0	0	0	0	43	0	22	6	0	57	49	0	0	0	0	8	0	0	0	0	18	0	0	16
1283	29-Dec-21	0:50:00	1	0	1	0	CT	0	0	76	0	45	0	70	0	37	26	0	2	0	0	52	0	0	0	0	47	47	0	5	0	0	27	0	0	0	0	13	0	0	10
1284	29-Dec-21	0:55:00	1	0	1	0	CT	0	0	58	0	60	0	95	0	32	22	0	9	0	0	36	0	0	0	0	77	97	0	45	0	0	27	0	0	0	0	0	0	0	0
1285	29-Dec-21	1:00:00	1	0	1	0	CT	0	0	0	0	37	0	34	0	35	47	0	0	0	0	56	0	0	0	0	50	55	0	2	5	0	69	0	0	0	0	3	0	0	0
1286	29-Dec-21	1:05:00	1	0	1	0	CT	0	0	0	0	45	0	109	0	19	54	1	0	0	0	52	0	0	9	0	37	74	0	0	0	0	62	0	0	0	0	0	0	0	0
1287	29-Dec-21	1:10:00	1	0	1	0	CT	0	0	0	0	23	0	56	0	39	35	0	0	0	0	63	0	0	1	0	63	75	0	1	0	0	0	0	3	0	0	31	0	0	0
1288	29-Dec-21	1:15:00	1	0	1	0	CT	0	0	0	0	41	0	97	0	34	41	0	0	0	4	53	0	0	1	0	67	92	0	0	0	0	0	0	0	0	0	10	0	0	0
1289	29-Dec-21	1:20:00	1	0	1	0	CT	0	0	0	0	33	0	80	0	22	49	0	4	0	0	48	0	0	39	0	73	67	0	0	0	0	0	0	0	0	0	5	0	0	0
1290	29-Dec-21	1:25:00	1	0	1	0	CT	0	0	12	0	49	0	85	0	63	19	0	0	0	0	35	0	0	12	0	12	79	0	0	51	0	0	1	0	0	0	0	0	0	0
1291	29-Dec-21	1:30:00	1	0	1	0	CT	0	0	51	0	33	0	91	0	0	0	0	0	0	0	41	0	0	30	0	21	68	0	0	15	0	0	0	0	0	0	0	0	0	0
1292	29-Dec-21	1:35:00	1	0	1	0	CT	0	0	0	0	44	0	22	0	13	0	0	0	0	0	58	0	0	0	0	0	82	0	0	9	0	0	0	0	0	0	13	0	0	0
1293	29-Dec-21	1:40:00	1	0	1	0	CT	0	0	0	0	51	0	63	0	9	0	0	0	0	0	45	0	0	60	0	0	74	0	0	0	0	0	0	0	0	0	86	0	0	0
1294	29-Dec-21	1:45:00	1	0	1	0	CT	0	0	0	0	28	0	73	0	0	0	0	0	0	0	11	0	0	63	0	0	62	0	0	17	0	0	0	0	0	0	21	0	1	0
1295	29-Dec-21	1:50:00	1	0	1	0	CT	0	0	0	0	31	0	73	0	17	0	1	0	3	3	0	0	7	0	0	0	68	0	0	7	0	0	0	0	52	0	7	0	0	0
1296	29-Dec-21	1:55:00	1	0	1	0	CT	0	0	0	0	49	0	81	0	44	0	3	8	0	0	0	0	0	4	0	0	90	0	0	5	0	0	0	0	46	0	27	0	0	0
1297	29-Dec-21	2:00:00	1	0	1	0	CT	0	0	0	0	6	0	44	24	63	0	2	0	0	0	0	0	1	0	0	0	64	0	6	22	0	0	23	0	53	0	0	0	0	0
1298	29-Dec-21	2:05:00	1	0	1	0	CT	0	0	0	0	0	0	45	16	0	0	0	0	0	1	0	0	0	0	0	0	41	50	0	1	0	0	63	0	0	0	1	0	0	0
1299	29-Dec-21	2:10:00	1	0	1	0	CT	0	0	0	0	0	0	47	64	0	0	22	0	0	21	0	0	0	0	0	0	39	20	0	1	0	0	63	0	0	0	17	0	0	0
1300	29-Dec-21	2:15:00	1	0	1	0	CT	0	0	7	0	0	0	23	63	0	0	8	2	0	65	0	0	4	6	0	0	39	6	12	2	0	0	23	0	0	0	45	0	0	0
1301	29-Dec-21	2:20:00	1	0	1	0	CT	0	0	0	0	0	0	0	19	0	0	0	0	0	47	0	0	4	5	0	4	43	0	4	0	0	0	2	0	0	0	58	0	3	0
1302	29-Dec-21	2:25:00	1	0	1	0	CT	0	0	0	0	1	0	0	0	4	0	0	0	0	20	0	0	24	0	0	22	40	0	0	0	0	0	0	0	0	0	44	0	0	0
1303	29-Dec-21	2:30:00	1	0	1	0	CT	0	0	0	0	4	0	0	0	0	0	0	2	0	0	0	0	19	0	0	7	1	0	0	1	0	0	0	0	0	0	0	0	0	0
1304	29-Dec-21	2:35:00	1	0	1	0	CT	0	0	0	0	8	0	0	0	0	0	0	0	0	0	0	0	0	0	0	0	0	0	0	4	0	14	0	4	0	0	3	0	0	0
1305	29-Dec-21	2:40:00	1	0	1	0	CT	0	0	0	0	18	0	0	0	1	0	0	0	0	0	0	0	0	0	0	0	0	2	0	3	0	26	0	7	0	0	26	0	0	0
1306	29-Dec-21	2:45:00	1	0	1	0	CT	0	0	49	0	2	0	0	0	0	0	0	0	0	0	0	0	0	0	0	0	0	0	0	16	0	32	1	23	0	0	66	0	0	0
1307	29-Dec-21	2:50:00	1	0	1	0	CT	0	0	0	0	0	0	0	0	13	0	0	0	0	0	0	0	0	0	0	0	0	0	0	17	0	24	1	15	0	0	7	0	0	0
1308	29-Dec-21	2:55:00	1	0	1	0	CT	0	0	0	0	0	0	0	0	33	0	0	0	0	0	0	0	0	11	0	0	3	0	0	0	0	37	1	0	0	0	1	0	0	0
1309	29-Dec-21	3:00:00	1	0	1	0	CT	0	0	0	0	0	0	0	0	78	0	0	0	0	0	0	0	0	49	0	0	3	0	0	0	0	0	0	0	0	0	0	0	0	0
1310	29-Dec-21	3:05:00	1	0	1	0	CT	0	0	0	0	0	0	0	0	54	0	0	0	0	0	0	0	2	17	0	0	0	0	0	20	0	0	0	0	0	0	44	0	0	0
1311	29-Dec-21	3:10:00	1	0	1	0	CT	0	0	0	0	0	0	8	0	44	0	0	24	0	0	0	0	0	1	0	0	0	0	0	35	0	0	0	3	0	0	69	0	0	0
1312	29-Dec-21	3:15:00	1	0	1	0	CT	0	0	0	0	0	0	19	0	31	0	0	0	0	0	0	0	0	0	0	0	0	0	0	45	0	0	0	0	0	0	59	0	6	0
1313	29-Dec-21	3:20:00	1	0	1	0	CT	0	0	0	0	0	0	16	0	40	0	0	0	12	2	0	0	0	0	0	0	0	0	63	10	0	0	0	1	0	0	0	17	5	0
1314	29-Dec-21	3:25:00	1	0	1	0	CT	0	0	8	0	0	0	2	0	6	0	0	0	2	0	0	0	0	0	0	0	0	0	1	2	0	0	0	0	4	0	30	51	0	0
1315	29-Dec-21	3:30:00	1	0	1	0	CT	0	0	34	0	0	0	33	0	0	0	0	0	0	0	0	0	0	0	0	4	27	0	1	48	0	0	1	0	0	0	0	6	1	0
1316	29-Dec-21	3:35:00	1	0	1	0	CT	0	0	4	0	1	0	71	0	0	0	0	63	0	1	0	0	0	2	0	0	2	0	2	0	0	0	0	0	38	0	46	0	0	0
1317	29-Dec-21	3:40:00	1	0	1	0	CT	0	0	26	0	1	0	93	0	16	1	0	63	0	0	1	0	0	7	0	0	0	0	0	0	0	0	0	0	1	0	17	0	0	0
1318	29-Dec-21	3:45:00	1	0	1	0	CT	0	0	31	0	0	22	29	63	0	0	0	0	0	0	0	31	0	2	0	0	0	0	1	0	0	0	0	0	1	0	15	0	0	0
1319	29-Dec-21	3:50:00	1	0	1	0	CT	0	0	0	0	0	73	16	22	0	0	0	0	0	5	0	13	17	20	0	0	0	50	0	0	0	0	0	0	4	0	8	0	0	0
1320	29-Dec-21	3:55:00	1	0	1	0	CT	0	0	0	0	0	61	0	0	0	0	0	0	0	11	0	0	9	0	0	0	0	0	0	0	0	0	1	0	2	0	2	0	18	0
1321	29-Dec-21	4:00:00	1	0	1	0	CT	0	0	0	0	11	35	0	0	0	0	0	0	0	22	0	0	1	0	0	0	0	0	1	0	0	0	9	0	8	0	69	0	0	0
1322	29-Dec-21	4:05:00	1	0	1	0	CT	0	0	0	0	63	0	0	0	0	5	0	0	0	26	0	0	13	0	0	17	0	0	7	0	0	0	17	0	0	0	47	0	0	0
1323	29-Dec-21	4:10:00	1	0	1	0	CT	0	0	0	0	13	0	0	0	0	0	0	0	0	9	0	0	2	0	0	33	0	3	11	0	0	0	0	2	0	0	2	0	0	5
1324	29-Dec-21	4:15:00	1	0	1	0	CT	0	0	0	0	3	0	0	0	1	25	0	0	0	0	3	0	0	0	0	0	23	0	1	0	0	0	0	5	0	0	51	0	10	0
1325	29-Dec-21	4:20:00	1	0	1	0	CT	0	0	0	0	0	0	0	0	0	0	0	9	16	0	0	0	0	0	0	0	73	0	0	19	0	0	0	10	0	0	76	0	19	0
1326	29-Dec-21	4:25:00	1	0	1	0	CT	0	0	0	0	0	0	0	0	4	0	0	0	1	0	4	8	0	33	0	0	7	0	0	9	0	0	0	14	0	0	43	0	42	0
1327	29-Dec-21	4:30:00	1	0	1	0	CT	0	0	0	0	6	0	0	0	0	0	0	0	1	0	0	0	17	32	0	0	0	0	0	0	0	0	0	0	31	0	13	0	38	0
1328	29-Dec-21	4:35:00	1	0	1	0	CT	0	0	0	0	9	1	0	4	0	0	0	0	0	0	0	14	0	0	0	3	0	0	0	11	0	0	16	0	33	0	0	0	0	3
1329	29-Dec-21	4:40:00	1	0	1	0	CT	0	0	34	0	0	0	6	0	3	0	0	0	0	0	0	10	0	0	0	48	0	0	4	7	0	0	1	0	43	0	16	0	3	12
1330	29-Dec-21	4:45:00	1	0	1	0	CT	0	0	27	0	0	0	1	0	0	0	0	0	13	0	0	2	2	0	0	54	0	0	0	2	0	0	0	0	57	0	62	0	0	0
1331	29-Dec-21	4:50:00	1	0	1	0	CT	0	0	1	0	0	2	37	29	0	0	0	0	0	4	0	2	0	0	0	58	0	0	2	49	0	0	1	15	59	0	0	61	0	0
1332	29-Dec-21	4:55:00	1	0	1	0	CT	0	0	11	0	0	2	23	22	1	0	0	0	4	0	0	0	0	0	0	20	0	0	0	35	0	0	0	5	21	0	0	0	0	0
1333	29-Dec-21	5:00:00	1	0	1	0	CT	0	0	0	0	0	0	0	5	19	0	0	0	0	0	0	63	0	0	0	21	0	0	8	15	0	0	0	0	51	4	1	0	6	0
1334	29-Dec-21	5:05:00	1	0	1	0	CT	0	0	0	0	9	0	0	0	4	0	0	3	0	0	0	0	0	3	0	33	0	0	7	13	0	0	3	0	63	12	54	0	17	0
1335	29-Dec-21	5:10:00	1	0	1	0	CT	0	0	0	0	1	0	0	0	33	0	16	1	0	0	0	0	7	10	0	0	0	0	0	0	0	0	3	0	0	0	5	0	1	0
1336	29-Dec-21	5:15:00	1	0	1	0	CT	0	0	0	0	0	0	0	0	32	0	0	16	0	0	7	0	7	0	0	28	0	0	0	0	0	4	53	0	0	0	12	0	0	0
1337	29-Dec-21	5:20:00	1	0	1	0	CT	0	0	0	0	3	0	0	0	36	0	0	0	1	0	17	1	32	2	0	14	0	0	0	0	0	59	63	0	0	0	0	0	4	19
1338	29-Dec-21	5:25:00	1	0	1	0	CT	0	0	0	0	0	0	0	0	45	9	0	0	1	0	38	0	37	0	0	0	0	5	0	0	0	63	0	0	0	0	2	0	0	0
1339	29-Dec-21	5:30:00	1	0	1	0	CT	0	0	0	0	4	0	0	1	19	0	0	0	0	4	0	0	0	0	0	0	0	0	0	0	0	63	0	0	0	0	2	0	0	5
1340	29-Dec-21	5:35:00	1	0	1	0	CT	0	0	14	0	0	0	0	1	40	15	0	63	0	81	0	0	1	59	0	0	28	0	0	0	0	45	4	0	0	0	27	0	0	0
1341	29-Dec-21	5:40:00	1	0	1	0	CT	0	0	0	0	0	0	0	0	35	2	1	17	1	0	4	0	1	10	0	0	41	0	0	0	0	0	0	0	0	0	51	0	0	1
1342	29-Dec-21	5:45:00	1	0	1	0	CT	0	0	0	0	0	0	0	0	0	15	27	0	0	6	0	0	16	0	0	0	67	0	0	0	0	0	0	0	1	0	9	0	0	8
1343	29-Dec-21	5:50:00	1	0	1	0	CT	0	0	0	0	0	0	0	22	0	0	26	0	6	29	0	0	76	0	0	0	65	0	0	11	0	0	0	0	0	0	4	25	0	1
1344	29-Dec-21	5:55:00	1	0	1	0	CT	0	0	0	0	0	0	0	33	0	0	3	0	16	0	0	0	60	0	0	0	45	0	1	43	0	0	0	0	1	20	59	3	0	0
1345	29-Dec-21	6:00:00	1	0	1	0	CT	0	0	0	0	0	0	0	0	0	0	0	0	6	0	0	0	42	0	0	0	34	0	0	14	0	0	0	6	0	31	56	0	0	0
1346	29-Dec-21	6:05:00	1	0	1	0	CT	0	0	0	0	0	0	0	0	0	3	0	26	31	0	0	4	7	0	0	0	10	0	0	34	0	0	0	0	5	0	0	0	0	0
1347	29-Dec-21	6:10:00	1	0	1	0	CT	0	0	0	0	0	0	0	0	0	29	0	0	0	0	3	0	49	0	0	0	1	0	17	0	0	0	0	6	0	0	0	0	0	6
1348	29-Dec-21	6:15:00	1	0	1	0	CT	0	0	25	25	1	0	0	40	0	2	0	0	0	9	30	0	40	29	0	0	7	0	1	0	0	0	0	7	0	0	37	0	0	0
1349	29-Dec-21	6:20:00	1	0	1	0	CT	0	0	43	45	9	0	0	63	0	0	0	0	21	0	49	0	58	8	0	0	39	0	1	0	0	0	0	15	0	0	65	0	21	0
1350	29-Dec-21	6:25:00	1	0	1	0	CT	0	0	46	10	0	0	0	16	0	28	0	0	6	0	42	0	52	0	0	0	58	29	8	0	0	0	0	21	0	0	60	0	63	0
1351	29-Dec-21	6:30:00	1	0	1	0	CT	0	0	17	0	14	0	0	3	0	0	0	0	1	0	29	0	21	0	0	0	50	52	63	0	0	0	0	0	19	0	29	0	28	0
1352	29-Dec-21	6:35:00	1	0	1	0	CT	0	0	0	0	53	0	0	35	0	0	14	0	1	3	58	0	0	0	0	13	67	34	63	0	0	9	0	0	0	0	2	0	0	0
1353	29-Dec-21	6:40:00	1	0	1	0	CT	0	0	0	0	0	0	0	42	0	0	76	0	0	0	55	0	0	0	0	16	32	0	1	1	0	7	0	0	13	0	9	0	0	0
1354	29-Dec-21	6:45:00	1	0	1	0	CT	0	0	8	0	46	0	1	64	0	0	6	0	3	4	49	0	0	0	0	75	0	8	0	1	0	8	0	0	2	0	2	8	0	0
1355	29-Dec-21	6:50:00	1	0	1	0	CT	0	0	0	0	0	14	0	91	0	0	0	0	0	0	51	0	0	0	0	61	0	0	0	0	0	0	15	0	0	0	0	7	0	8
1356	29-Dec-21	6:55:00	1	0	1	0	CT	0	0	0	0	0	35	29	47	0	0	0	0	3	0	39	4	0	0	0	67	0	0	0	0	0	0	63	0	4	5	58	0	0	16
1357	29-Dec-21	7:00:00	1	0	1	0	CT	0	0	0	0	0	68	0	0	0	17	0	0	19	0	48	29	0	0	0	29	0	0	0	0	0	0	1	0	0	8	64	0	0	2
1358	29-Dec-21	7:05:00	1	0	1	0	CT	0	0	5	0	0	0	0	49	0	60	0	0	0	21	25	15	0	0	0	0	0	0	0	0	0	0	10	0	0	0	9	0	0	29
1359	29-Dec-21	7:10:00	1	0	1	0	CT	0	0	0	0	0	0	0	14	0	29	0	0	0	36	47	0	0	0	0	8	0	0	0	0	0	0	24	0	0	1	0	0	0	0
1360	29-Dec-21	7:15:00	1	0	1	0	CT	0	0	0	0	0	0	0	0	0	1	0	0	13	40	45	0	0	0	0	0	0	0	0	0	0	0	0	0	0	0	41	4	52	0
1361	29-Dec-21	7:20:00	1	0	1	0	CT	0	0	0	0	0	0	1	72	0	5	0	0	0	76	67	1	0	16	0	0	14	0	0	0	0	0	1	5	0	5	19	0	0	0
1362	29-Dec-21	7:25:00	1	0	1	0	CT	0	0	0	0	0	0	0	45	8	0	0	0	0	21	36	0	19	52	0	0	3	0	35	0	0	0	1	0	0	0	39	1	0	0
1363	29-Dec-21	7:30:00	1	0	1	0	CT	0	0	0	0	8	0	0	7	9	1	0	0	0	0	52	10	39	52	0	0	0	0	46	0	0	0	0	0	0	0	20	0	0	0
1364	29-Dec-21	7:35:00	1	0	1	0	CT	0	0	0	60	0	0	3	0	49	4	0	0	0	0	49	28	30	45	0	0	0	0	8	0	0	0	8	0	1	0	11	0	0	0
1365	29-Dec-21	7:40:00	1	0	1	0	CT	0	0	0	43	0	56	2	2	48	3	0	0	0	0	21	12	0	9	0	0	0	0	0	0	0	0	90	0	0	10	21	1	9	0
1366	29-Dec-21	7:45:00	1	0	1	0	CT	0	0	0	5	17	0	5	39	12	6	0	0	4	0	52	2	0	0	0	7	0	1	0	0	0	0	24	5	0	6	11	1	35	0
1367	29-Dec-21	7:50:00	1	0	1	0	CT	0	0	16	31	63	0	2	15	0	0	23	0	3	0	5	3	0	41	0	53	0	1	15	0	0	0	0	0	18	56	0	3	65	0
1368	29-Dec-21	7:55:00	1	0	1	0	CT	0	0	72	73	33	0	25	9	0	0	55	0	0	0	0	2	1	53	0	100	16	13	25	34	0	0	0	0	16	22	0	25	40	0
1369	29-Dec-21	8:00:00	1	0	1	0	CT	0	0	24	7	0	0	20	37	0	1	17	0	18	13	0	6	2	26	0	82	37	54	6	0	0	0	0	5	3	16	1	4	49	0
1370	29-Dec-21	8:05:00	1	0	1	0	CT	0	1	46	82	31	28	54	78	34	35	101	11	29	39	37	18	80	82	0	49	34	84	74	17	0	12	3	70	77	63	85	26	54	13
1371	29-Dec-21	8:10:00	1	0	1	0	CT	0	1	41	46	29	46	117	48	67	60	82	40	69	49	70	14	65	67	0	40	86	53	61	0	0	32	63	71	59	38	51	0	58	17
1372	29-Dec-21	8:15:00	1	0	1	0	CT	0	1	10	53	36	18	86	42	41	46	68	34	69	79	57	18	84	76	0	27	68	20	56	15	0	29	53	87	67	49	0	27	38	0
1373	29-Dec-21	8:20:00	1	0	1	0	CT	0	1	3	26	53	25	59	32	69	28	22	64	22	40	44	19	39	50	0	11	122	31	12	18	0	24	42	60	39	29	0	11	30	0
1374	29-Dec-21	8:25:00	1	0	1	0	CT	0	1	27	33	4	13	43	53	84	62	10	7	19	30	58	41	28	35	0	69	22	2	12	2	0	70	9	61	85	25	23	31	43	0
1375	29-Dec-21	8:30:00	1	0	1	0	CT	0	1	25	24	30	11	0	27	25	63	0	36	68	43	47	37	63	48	0	38	64	0	5	0	0	13	0	50	70	17	1	23	50	0
1376	29-Dec-21	8:35:00	1	0	1	0	CT	0	1	0	25	9	45	41	43	23	17	17	36	44	10	44	27	7	32	0	54	23	0	10	0	0	0	9	101	31	26	0	0	51	0
1377	29-Dec-21	8:40:00	1	0	1	0	CT	0	1	0	42	21	39	41	33	37	40	0	59	5	43	65	12	1	40	0	43	19	22	2	0	0	0	9	43	24	28	0	5	13	0
1378	29-Dec-21	8:45:00	1	0	1	0	CT	0	1	0	52	27	25	33	64	22	17	0	20	52	16	47	24	1	22	0	46	8	39	0	0	0	0	15	24	29	19	0	45	44	2
1379	29-Dec-21	8:50:00	1	0	1	0	CT	0	1	0	19	62	30	1	46	19	0	0	38	0	33	46	12	1	20	0	41	0	7	5	0	0	0	63	25	20	20	0	7	39	15
1380	29-Dec-21	8:55:00	1	0	1	0	CT	0	1	0	34	50	27	0	21	69	0	0	58	0	21	45	5	1	20	0	32	0	39	28	0	0	0	3	37	48	20	0	87	27	0
1381	29-Dec-21	9:00:00	1	0	1	0	CT	0	1	0	32	20	3	0	29	17	0	59	26	0	14	26	34	0	58	0	39	0	26	30	0	0	0	4	27	34	22	0	8	19	9
1382	29-Dec-21	9:05:00	1	0	1	0	CT	0	1	0	19	37	0	0	8	49	0	0	23	4	0	56	16	1	54	0	18	0	11	21	0	0	0	16	0	59	24	0	0	42	39
1383	29-Dec-21	9:10:00	1	0	1	0	CT	0	1	7	29	39	0	1	37	59	0	10	19	38	5	47	30	4	22	0	24	0	34	20	0	0	1	40	0	45	26	0	0	35	0
1384	29-Dec-21	9:15:00	1	0	1	0	CT	0	1	36	15	11	0	0	36	31	0	0	0	25	30	0	25	12	34	0	34	0	17	9	17	0	65	88	27	40	21	18	27	46	0
1385	29-Dec-21	9:20:00	1	0	1	0	CT	0	1	70	26	35	0	0	7	24	0	10	0	28	41	0	17	12	18	0	0	0	31	0	25	0	44	17	34	75	24	9	13	9	0
1386	29-Dec-21	9:25:00	1	0	1	0	CT	0	1	13	14	1	0	0	30	7	0	26	0	0	0	0	60	0	17	0	0	4	58	0	7	0	4	22	3	28	25	0	22	8	0
1387	29-Dec-21	9:30:00	1	0	1	0	CT	0	1	0	53	2	0	9	12	28	14	0	0	0	0	0	16	0	19	0	56	0	38	1	2	0	0	3	0	33	42	0	28	3	0
1388	29-Dec-21	9:35:00	1	0	1	0	CT	0	1	0	10	0	0	15	58	38	54	0	0	0	0	0	26	0	30	0	74	0	34	6	6	0	0	1	0	45	24	0	10	56	0
1389	29-Dec-21	9:40:00	1	0	1	0	CT	0	1	0	17	0	0	8	72	73	35	0	0	0	0	0	22	16	13	0	53	0	30	15	54	0	0	50	0	95	22	0	49	9	13
1390	29-Dec-21	9:45:00	1	0	1	0	CT	0	1	0	0	0	0	7	21	45	0	0	3	1	0	0	35	15	7	0	80	0	45	0	22	0	0	17	0	36	0	0	23	41	1
1391	29-Dec-21	9:50:00	1	0	1	0	CT	0	1	41	0	0	0	0	14	4	0	73	2	0	0	0	31	13	24	0	16	4	33	21	18	0	0	0	39	38	0	0	5	22	0
1392	29-Dec-21	9:55:00	1	0	1	0	CT	0	1	0	1	0	0	0	5	0	0	0	8	16	1	0	26	0	78	0	21	17	9	5	7	0	0	0	13	38	0	0	0	20	6
1393	29-Dec-21	10:00:00	1	0	1	0	CT	0	1	0	23	16	4	0	13	0	0	0	20	0	41	23	0	1	22	0	47	7	50	0	0	0	0	0	32	43	0	0	0	27	1
1394	29-Dec-21	10:05:00	1	0	1	0	CT	0	1	0	0	4	13	0	46	0	0	0	11	0	0	60	0	41	29	0	14	66	56	0	0	0	1	0	9	53	0	0	31	1	11
1395	29-Dec-21	10:10:00	1	0	1	0	CT	0	1	0	20	14	66	0	29	0	0	0	10	22	0	55	0	0	47	0	0	0	32	0	0	0	18	0	7	32	0	0	27	27	16
1396	29-Dec-21	10:15:00	1	0	1	0	CT	0	1	0	20	15	35	0	16	38	1	0	23	36	0	57	0	0	30	0	0	0	37	0	0	0	12	0	0	4	0	0	3	37	0
1397	29-Dec-21	10:20:00	1	0	1	0	CT	0	1	34	12	0	20	0	5	35	19	0	8	29	0	46	10	0	14	0	0	0	10	0	0	0	32	18	0	28	7	7	44	11	0
1398	29-Dec-21	10:25:00	1	0	1	0	CT	0	1	70	0	8	9	0	29	31	37	0	0	25	23	48	25	0	22	0	0	23	15	0	0	0	4	86	9	32	40	3	17	52	0
1399	29-Dec-21	10:30:00	1	0	1	0	CT	0	1	1	0	0	0	0	25	24	8	65	0	0	60	31	39	0	3	0	33	16	47	0	0	0	0	65	25	25	41	2	0	38	0
1400	29-Dec-21	10:35:00	1	0	1	0	CT	0	1	9	0	14	0	30	25	31	0	43	0	22	74	27	69	0	20	0	97	36	39	3	0	0	0	9	47	41	29	2	35	1	0
1401	29-Dec-21	10:40:00	1	0	1	0	CT	0	1	2	0	9	32	74	21	41	0	14	0	0	63	7	30	0	20	0	53	76	24	53	0	0	0	6	36	28	33	2	22	15	0
1402	29-Dec-21	10:45:00	1	0	1	0	CT	0	1	2	0	46	28	32	27	15	21	0	0	2	36	0	12	0	21	0	16	48	13	23	0	0	0	26	45	30	26	39	23	38	0
1403	29-Dec-21	10:50:00	1	0	1	0	CT	0	1	5	0	12	18	0	21	48	76	0	0	27	37	4	14	0	9	0	21	0	24	4	0	0	0	7	8	35	16	27	21	34	0
1404	29-Dec-21	10:55:00	1	0	1	0	CT	0	1	2	0	36	14	0	34	30	37	0	0	23	60	66	22	0	43	0	19	0	28	0	0	0	0	44	4	38	26	22	43	33	0
1405	29-Dec-21	11:00:00	1	0	1	0	CT	0	1	2	0	30	4	0	29	27	0	2	0	13	21	63	33	11	35	0	6	0	24	21	0	0	0	4	68	31	15	8	24	4	11
1406	29-Dec-21	11:05:00	1	0	1	0	CT	0	1	24	0	60	30	0	22	17	0	4	36	13	0	61	37	8	21	0	0	0	14	14	0	0	0	0	6	25	34	0	33	23	7
1407	29-Dec-21	11:10:00	1	0	1	0	CT	0	1	12	52	31	17	31	19	25	0	0	27	9	0	40	18	0	16	0	0	0	22	50	0	0	7	78	30	36	12	0	42	34	0
1408	29-Dec-21	11:15:00	1	0	1	0	CT	0	1	3	10	22	5	9	63	28	0	0	38	27	0	36	9	0	7	0	0	0	44	2	0	0	8	22	26	30	13	0	24	21	5
1409	29-Dec-21	11:20:00	1	0	1	0	CT	0	1	0	0	2	8	1	46	28	0	0	32	39	3	71	22	0	17	0	0	0	16	0	0	0	0	0	15	77	0	0	7	31	0
1410	29-Dec-21	11:25:00	1	0	1	0	CT	0	1	0	24	32	14	3	23	30	0	0	0	9	3	38	31	4	26	0	0	0	27	15	9	0	0	0	34	36	0	33	12	16	24
1411	29-Dec-21	11:30:00	1	0	1	0	CT	0	1	0	0	0	3	14	27	14	0	0	7	23	4	45	21	40	1	0	2	40	25	33	36	0	6	0	43	23	17	49	26	22	0
1412	29-Dec-21	11:35:00	1	0	1	0	CT	0	1	0	13	63	8	30	35	53	0	0	25	0	1	39	17	0	0	0	68	43	29	0	47	0	0	0	17	26	18	71	24	31	0
1413	29-Dec-21	11:40:00	1	0	1	0	CT	0	1	0	11	12	16	71	47	36	0	0	28	0	49	34	21	0	0	0	48	12	40	18	16	0	7	0	13	17	0	78	0	49	0
1414	29-Dec-21	11:45:00	1	0	1	0	CT	0	1	0	6	69	10	25	66	80	12	18	55	0	76	36	4	4	0	0	7	0	33	40	16	0	34	0	15	37	0	60	0	11	0
1415	29-Dec-21	11:50:00	1	0	1	0	CT	0	1	0	12	38	26	30	43	32	44	66	21	0	24	44	12	33	19	0	6	0	2	25	49	0	36	0	49	40	0	33	0	10	0
1416	29-Dec-21	11:55:00	1	0	1	0	CT	0	1	0	0	49	20	0	72	26	21	1	18	0	8	25	17	44	40	0	31	0	0	16	14	0	73	0	32	72	0	0	0	0	0
1417	29-Dec-21	12:00:00	1	0	1	0	CT	0	1	0	0	41	18	0	31	18	40	0	7	0	0	49	16	5	42	0	34	0	0	23	16	0	73	0	24	56	1	0	0	30	0
1418	29-Dec-21	12:05:00	1	0	1	0	CT	0	1	40	0	19	10	0	14	24	5	0	2	1	0	44	15	0	24	0	37	1	0	25	5	0	12	79	42	46	3	31	0	0	0
1419	29-Dec-21	12:10:00	1	0	1	0	CT	0	1	0	0	20	10	0	3	24	0	0	0	0	3	25	20	0	20	0	15	0	0	36	2	0	0	4	0	49	29	63	0	0	3
1420	29-Dec-21	12:15:00	1	0	1	0	CT	0	1	0	0	17	7	0	0	22	0	0	0	0	2	45	13	0	44	0	0	12	12	6	0	0	0	10	21	31	8	74	0	0	5
1421	29-Dec-21	12:20:00	1	0	1	0	CT	0	1	0	0	27	10	0	11	53	0	0	20	0	1	26	0	0	47	0	0	69	23	44	0	0	0	1	4	21	10	56	11	0	13
1422	29-Dec-21	12:25:00	1	0	1	0	CT	0	1	0	0	0	0	0	41	39	0	0	1	0	5	0	0	0	36	0	0	69	13	0	0	0	0	1	0	0	28	25	9	30	0
1423	29-Dec-21	12:30:00	1	0	1	0	CT	0	1	53	0	17	0	12	43	37	41	1	62	0	0	0	0	0	12	0	7	22	15	22	0	0	0	1	0	33	2	4	20	33	8
1424	29-Dec-21	12:35:00	1	0	1	0	CT	0	1	0	0	7	0	57	19	20	44	0	28	0	19	0	0	0	29	0	0	0	8	17	0	0	0	0	0	36	0	15	0	36	45
1425	29-Dec-21	12:40:00	1	0	1	0	CT	0	1	0	0	0	0	14	36	23	83	0	15	0	58	0	23	0	38	0	0	0	12	2	24	0	0	1	0	81	0	0	0	11	12
1426	29-Dec-21	12:45:00	1	0	1	0	CT	0	1	0	19	3	0	5	24	31	21	0	20	0	0	0	20	7	17	0	15	0	19	39	41	0	27	8	0	12	0	42	0	53	0
1427	29-Dec-21	12:50:00	1	0	1	0	CT	0	1	0	61	0	0	0	31	19	0	0	0	7	0	0	14	0	5	0	77	0	1	31	0	0	52	8	1	22	0	47	0	0	0
1428	29-Dec-21	12:55:00	1	0	1	0	CT	0	1	0	0	0	0	2	11	24	0	0	44	4	0	0	52	0	2	0	20	0	0	16	0	0	0	31	5	25	0	9	0	0	0
1429	29-Dec-21	13:00:00	1	0	1	0	CT	0	1	0	0	20	0	6	3	36	0	5	11	0	0	0	26	0	3	0	35	0	0	26	0	0	0	0	17	46	0	22	0	0	0
1430	29-Dec-21	13:05:00	1	0	1	0	CT	0	1	0	0	21	0	21	11	24	0	0	0	0	0	0	20	5	34	0	0	0	0	5	0	0	0	10	46	21	0	27	0	0	0
1431	29-Dec-21	13:10:00	1	0	1	0	CT	0	1	0	0	0	0	33	13	10	0	2	0	0	0	0	17	0	35	0	0	11	0	14	0	0	0	74	22	25	0	102	31	20	0
1432	29-Dec-21	13:15:00	1	0	1	0	CT	0	1	0	0	1	0	40	27	23	0	5	0	0	0	0	18	12	8	0	0	9	0	39	0	0	0	63	0	35	0	69	30	5	0
1433	29-Dec-21	13:20:00	1	0	1	0	CT	0	1	0	1	0	0	0	38	35	0	40	0	9	3	0	21	5	0	0	0	45	0	17	0	0	0	43	8	42	10	63	17	0	0
1434	29-Dec-21	13:25:00	1	0	1	0	CT	0	1	0	2	2	0	3	53	29	0	12	0	37	13	0	11	1	0	0	0	23	0	10	0	0	0	91	1	0	2	68	11	6	0
1435	29-Dec-21	13:30:00	1	0	1	0	CT	0	1	0	0	0	6	0	9	27	0	23	0	15	16	0	0	3	0	0	3	1	0	2	0	0	3	58	1	0	10	14	0	26	0
1436	29-Dec-21	13:35:00	1	0	1	0	CT	0	1	0	2	0	16	1	23	12	0	2	0	31	25	0	12	0	0	0	47	0	0	4	0	0	42	0	5	0	67	0	0	23	60
1437	29-Dec-21	13:40:00	1	0	1	0	CT	0	1	0	0	1	64	0	21	24	0	0	0	0	0	0	7	0	0	0	29	0	0	46	0	0	14	0	0	0	48	3	2	31	3
1438	29-Dec-21	13:45:00	1	0	1	0	CT	0	1	62	1	0	2	0	5	8	0	0	0	0	0	0	34	0	0	0	1	0	4	25	2	0	0	0	9	0	16	9	21	46	5
1439	29-Dec-21	13:50:00	1	0	1	0	CT	0	1	0	0	39	0	0	10	18	0	0	6	0	0	0	6	0	5	0	22	0	34	4	0	0	0	3	4	0	0	24	42	4	0
1440	29-Dec-21	13:55:00	1	0	1	0	CT	0	1	0	0	33	0	0	12	68	0	0	29	0	0	10	36	0	11	0	54	21	46	66	0	0	0	5	0	0	0	2	21	0	0
1441	29-Dec-21	14:00:00	1	0	1	0	CT	0	1	0	1	52	0	5	10	5	0	0	18	0	34	48	21	0	57	0	31	36	52	20	2	0	0	4	5	0	0	9	1	67	0
1442	29-Dec-21	14:05:00	1	0	1	0	CT	0	1	0	0	52	0	0	1	33	0	0	10	47	2	66	54	0	34	0	69	6	65	12	40	0	0	21	1	0	0	14	0	19	0
1443	29-Dec-21	14:10:00	1	0	1	0	CT	0	1	0	0	28	0	0	12	8	24	0	30	23	0	62	16	0	27	0	33	0	53	19	12	0	0	10	25	0	0	9	0	12	0
1444	29-Dec-21	14:15:00	1	0	1	0	CT	0	1	0	0	33	2	0	1	0	2	0	17	0	0	72	3	11	15	0	53	0	31	34	15	0	0	4	1	0	0	0	0	18	1
1445	29-Dec-21	14:20:00	1	0	1	0	CT	0	1	0	42	32	51	0	31	0	1	0	15	0	0	52	15	60	0	0	39	0	29	8	29	0	0	13	4	10	0	66	0	37	33
1446	29-Dec-21	14:25:00	1	0	1	0	CT	0	1	0	43	33	44	0	27	0	11	20	4	0	0	72	20	0	11	0	29	0	0	25	18	0	0	0	10	37	0	77	0	40	14
1447	29-Dec-21	14:30:00	1	0	1	0	CT	0	1	0	0	21	29	0	20	0	18	18	0	0	29	48	18	0	1	0	3	0	0	5	71	0	0	54	15	48	0	82	0	31	0
1448	29-Dec-21	14:35:00	1	0	1	0	CT	0	1	0	30	5	4	0	49	0	22	0	1	0	0	39	12	6	52	0	5	0	0	1	10	0	0	47	21	56	0	81	0	1	0
1449	29-Dec-21	14:40:00	1	0	1	0	CT	0	1	0	28	4	0	38	13	0	30	0	0	0	3	0	1	0	80	0	0	0	0	21	27	0	31	41	44	32	21	22	0	0	0
1450	29-Dec-21	14:45:00	1	0	1	0	CT	0	1	0	5	0	0	70	7	0	36	0	0	0	0	0	1	0	25	0	1	0	0	33	40	0	49	17	27	32	25	27	0	3	3
1451	29-Dec-21	14:50:00	1	0	1	0	CT	0	1	0	0	0	0	0	41	0	27	0	3	0	0	0	1	0	13	0	0	0	0	22	10	0	11	46	30	31	24	12	0	3	2
1452	29-Dec-21	14:55:00	1	0	1	0	CT	0	1	0	0	0	0	0	21	0	36	0	11	0	63	0	0	0	4	0	0	32	0	3	1	0	3	12	25	24	16	29	0	0	0
1453	29-Dec-21	15:00:00	1	0	1	0	CT	0	1	8	0	0	0	0	24	0	29	0	17	0	22	0	0	0	0	0	2	54	0	2	1	0	14	1	31	30	25	4	0	0	0
1454	29-Dec-21	15:05:00	1	0	1	0	CT	0	1	1	0	0	0	0	17	19	36	31	23	0	53	0	0	0	0	0	0	53	0	32	2	0	31	11	0	27	30	2	0	0	0
1455	29-Dec-21	15:10:00	1	0	1	0	CT	0	1	0	0	0	0	0	15	9	48	43	24	0	21	0	0	0	1	0	33	0	0	45	2	0	3	0	3	8	9	10	0	0	18
1456	29-Dec-21	15:15:00	1	0	1	0	CT	0	1	3	0	0	0	0	46	9	0	0	22	0	0	0	0	21	13	0	46	0	0	42	0	0	0	0	5	10	1	8	3	0	0
1457	29-Dec-21	15:20:00	1	0	1	0	CT	0	1	0	0	6	0	0	27	50	0	3	9	0	0	0	0	19	49	0	41	0	0	8	0	0	0	0	0	0	0	2	0	0	0
1458	29-Dec-21	15:25:00	1	0	1	0	CT	0	1	17	0	2	0	0	43	38	0	0	29	0	4	0	2	54	48	0	9	0	0	7	1	0	0	0	9	0	0	48	7	0	0
1459	29-Dec-21	15:30:00	1	0	1	0	CT	0	1	0	8	22	0	0	18	30	0	0	10	0	1	0	5	30	63	0	1	0	0	3	0	0	0	0	7	0	0	63	27	0	0
1460	29-Dec-21	15:35:00	1	0	1	0	CT	0	1	7	1	19	0	0	19	25	0	0	22	0	4	4	12	10	78	0	8	0	0	48	0	0	0	0	6	0	0	0	32	0	0
1461	29-Dec-21	15:40:00	1	0	1	0	CT	0	1	0	0	0	0	0	22	10	0	0	7	0	0	44	34	0	20	0	16	0	0	19	0	0	0	0	17	0	0	70	11	0	1
1462	29-Dec-21	15:45:00	1	0	1	0	CT	0	1	0	1	29	28	0	0	15	0	0	0	0	0	53	22	0	28	0	56	0	0	3	0	0	0	7	26	0	0	72	0	0	0
1463	29-Dec-21	15:50:00	1	0	1	0	CT	0	1	0	2	19	2	0	23	3	0	0	0	0	3	61	51	0	51	0	52	0	0	4	59	0	0	1	10	0	0	71	5	0	0
1464	29-Dec-21	15:55:00	1	0	1	0	CT	0	1	28	8	0	7	74	52	0	9	0	0	0	0	49	11	0	11	0	10	0	0	0	14	0	0	0	14	0	0	30	21	28	0
1465	29-Dec-21	16:00:00	1	0	1	0	CT	0	1	30	0	47	9	41	40	0	16	0	0	0	0	31	20	0	0	0	25	0	0	0	23	0	5	0	15	0	0	32	36	19	0
1466	29-Dec-21	16:05:00	1	0	1	0	CT	0	1	2	0	15	0	6	33	0	14	0	0	0	0	0	72	0	1	0	4	0	0	48	5	0	8	0	16	0	0	15	3	54	0
1467	29-Dec-21	16:10:00	1	0	1	0	CT	0	1	0	4	14	0	0	8	0	60	0	0	0	0	0	32	4	0	0	0	0	35	10	0	0	24	0	35	0	3	0	0	30	0
1468	29-Dec-21	16:15:00	1	0	1	0	CT	0	1	0	35	60	6	0	0	0	79	13	0	0	0	0	20	5	0	0	2	28	17	49	0	0	7	0	23	0	9	0	0	31	0
1469	29-Dec-21	16:20:00	1	0	1	0	CT	0	1	34	0	56	0	0	8	0	19	50	0	0	0	0	2	4	1	0	0	38	48	32	10	0	4	0	2	1	10	40	0	10	22
1470	29-Dec-21	16:25:00	1	0	1	0	CT	0	1	63	35	20	0	0	1	0	0	56	0	0	0	0	3	0	5	0	4	46	31	19	8	0	6	0	0	0	13	7	0	6	6
1471	29-Dec-21	16:30:00	1	0	1	0	CT	0	1	0	0	0	0	0	0	0	0	53	0	0	0	5	0	0	0	0	1	39	34	42	12	0	0	1	5	0	14	0	0	32	0
1472	29-Dec-21	16:35:00	1	0	1	0	CT	0	1	0	0	2	0	0	0	0	0	0	0	0	0	0	0	0	9	0	1	17	6	16	8	0	0	3	11	0	28	78	0	8	0
1473	29-Dec-21	16:40:00	1	0	1	0	CT	0	1	0	3	1	0	0	0	0	0	0	0	0	0	0	0	0	35	0	1	21	9	0	10	0	0	22	13	0	80	60	0	0	0
1474	29-Dec-21	16:45:00	1	0	1	0	CT	0	1	0	0	0	0	0	0	0	0	0	0	0	15	0	0	0	54	0	43	12	5	0	4	0	0	9	40	0	43	68	0	13	8
1475	29-Dec-21	16:50:00	1	0	1	0	CT	0	1	0	21	0	0	0	2	20	0	0	28	0	46	0	0	0	43	0	17	0	0	1	0	0	0	9	29	0	25	32	0	16	3
1476	29-Dec-21	16:55:00	1	0	1	0	CT	0	1	0	0	0	0	0	0	7	0	0	20	0	48	0	0	0	19	0	14	0	0	12	1	0	0	4	73	2	25	47	0	21	19
1477	29-Dec-21	17:00:00	1	0	1	0	CT	0	1	0	0	0	0	0	0	53	26	0	1	0	23	0	0	0	6	0	4	0	0	41	3	0	0	54	17	0	11	21	0	28	0
1478	29-Dec-21	17:05:00	1	0	1	0	CT	0	1	0	0	0	0	0	0	42	19	0	5	0	0	0	2	25	11	0	4	0	0	15	5	0	16	53	26	0	0	21	0	35	0
1479	29-Dec-21	17:10:00	1	0	1	0	CT	0	1	0	0	0	0	0	0	81	0	0	0	0	0	1	1	0	2	0	37	0	0	24	9	0	26	14	24	0	0	24	0	9	22
1480	29-Dec-21	17:15:00	1	0	1	0	CT	0	1	0	0	0	12	0	0	30	0	0	0	0	0	4	14	0	8	0	31	0	0	53	11	0	0	76	98	0	5	4	0	3	0
1481	29-Dec-21	17:20:00	1	0	1	0	CT	0	1	11	0	0	4	0	0	39	0	0	0	0	0	47	9	4	2	0	35	0	0	39	0	0	7	56	50	18	0	0	0	18	0
1482	29-Dec-21	17:25:00	1	0	1	0	CT	0	1	27	0	8	44	5	7	68	0	0	0	0	3	52	5	5	39	0	67	0	0	2	4	0	7	16	27	20	0	4	29	16	0
1483	29-Dec-21	17:30:00	1	0	1	0	CT	0	1	0	51	0	7	3	25	13	0	0	0	0	0	58	29	0	40	0	49	0	0	0	0	0	0	0	0	37	0	4	28	0	0
1484	29-Dec-21	17:35:00	1	0	1	0	CT	0	1	0	19	0	51	0	39	13	0	0	0	0	0	32	32	0	70	0	23	0	0	41	0	0	0	1	16	73	0	11	46	0	0
1485	29-Dec-21	17:40:00	1	0	1	0	CT	0	1	0	32	40	17	0	60	18	0	0	0	2	0	34	39	0	54	0	34	0	0	61	0	0	0	0	3	17	0	13	16	0	0
1486	29-Dec-21	17:45:00	1	0	1	0	CT	0	1	0	31	11	0	0	54	0	0	0	0	0	0	51	21	0	14	0	39	0	0	59	0	0	0	0	10	61	0	61	2	0	0
1487	29-Dec-21	17:50:00	1	0	1	0	CT	0	1	0	0	33	0	0	8	0	0	0	2	0	0	12	2	0	0	0	34	5	0	22	0	0	0	0	30	4	0	13	8	0	0
1488	29-Dec-21	17:55:00	1	0	1	0	CT	0	1	0	2	50	0	0	37	0	24	0	63	0	0	0	0	0	3	0	2	25	0	0	0	0	0	0	86	0	18	4	53	6	0
1489	29-Dec-21	18:00:00	1	0	1	0	CT	0	1	0	24	41	0	0	11	0	46	0	55	0	0	0	0	0	25	0	20	44	0	11	6	0	0	49	32	0	12	8	24	0	0
1490	29-Dec-21	18:05:00	1	0	1	0	CT	0	1	0	11	0	0	0	45	0	42	27	39	0	5	0	0	0	42	0	17	71	0	0	30	0	0	0	67	0	14	8	13	3	25
1491	29-Dec-21	18:10:00	1	0	1	0	CT	0	1	0	0	0	0	0	16	0	41	34	10	0	63	0	0	0	29	0	28	16	0	0	10	0	0	3	26	0	61	0	23	0	20
1492	29-Dec-21	18:15:00	1	0	1	0	CT	0	1	14	0	0	30	0	13	0	21	49	25	0	55	0	0	0	8	0	21	9	0	0	30	0	4	11	4	0	28	0	0	0	0
1493	29-Dec-21	18:20:00	1	0	1	0	CT	0	1	18	0	0	2	0	21	0	35	0	40	0	87	0	2	5	6	0	24	0	0	19	37	0	25	11	4	0	11	0	0	0	7
1494	29-Dec-21	18:25:00	1	0	1	0	CT	0	1	0	0	0	13	0	0	1	32	0	63	0	40	0	4	44	3	0	32	0	0	54	9	0	9	24	11	0	6	20	0	0	0
1495	29-Dec-21	18:30:00	1	0	1	0	CT	0	1	0	0	0	14	0	10	0	0	0	32	0	17	0	0	83	3	0	12	11	0	59	0	0	1	2	32	0	11	13	0	0	0
1496	29-Dec-21	18:35:00	1	0	1	0	CT	0	1	0	0	0	0	0	16	2	0	0	1	0	0	0	0	24	66	0	16	25	0	20	38	0	0	0	5	0	5	10	0	0	0
1497	29-Dec-21	18:40:00	1	0	1	0	CT	0	1	0	0	3	0	0	4	5	0	0	19	0	0	0	0	1	5	0	0	0	21	5	24	0	0	20	14	0	23	14	0	0	0
1498	29-Dec-21	18:45:00	1	0	1	0	CT	0	1	0	0	0	0	0	0	42	0	0	0	0	0	0	0	41	48	0	11	0	40	5	17	0	0	22	2	0	31	2	0	0	0
1499	29-Dec-21	18:50:00	1	0	1	0	CT	0	1	0	0	6	0	0	0	63	0	0	0	0	0	0	0	52	25	0	52	0	53	70	36	0	0	14	34	0	25	1	0	0	1
1500	29-Dec-21	18:55:00	1	0	1	0	CT	0	1	0	0	81	0	0	2	43	0	0	0	0	0	22	0	12	2	0	18	3	5	27	1	0	0	1	42	15	10	0	0	0	28
1501	29-Dec-21	19:00:00	1	0	1	0	CT	0	1	0	40	20	0	0	41	76	0	66	0	3	0	39	5	33	0	0	14	37	7	15	0	0	50	8	25	2	20	0	0	16	0
1502	29-Dec-21	19:05:00	1	0	1	0	CT	0	1	0	0	4	13	51	49	16	2	30	0	16	0	38	18	48	0	0	0	55	0	5	0	0	29	98	4	0	1	0	0	19	0
1503	29-Dec-21	19:10:00	1	0	1	0	CT	0	1	1	39	2	0	79	1	12	1	7	0	0	2	38	25	9	0	0	0	65	0	0	0	0	0	26	18	0	0	0	0	58	0
1504	29-Dec-21	19:15:00	1	0	1	0	CT	0	1	43	0	58	0	30	13	10	18	0	0	0	18	12	35	22	0	0	9	0	0	0	0	0	0	2	16	0	0	0	0	13	0
1505	29-Dec-21	19:20:00	1	0	1	0	CT	0	1	43	0	8	0	25	5	10	16	1	0	17	10	0	23	3	0	0	0	0	0	0	0	0	0	3	6	0	0	0	0	0	7
1506	29-Dec-21	19:25:00	1	0	1	0	CT	0	1	0	0	27	0	0	5	0	72	0	0	33	27	0	6	0	0	0	16	3	0	5	39	0	0	11	3	0	0	0	17	3	0
1507	29-Dec-21	19:30:00	1	0	1	0	CT	0	1	0	0	15	2	0	2	0	35	0	0	23	0	0	0	0	2	0	55	40	0	28	0	0	0	48	3	0	0	0	11	2	0
1508	29-Dec-21	19:35:00	1	0	1	0	CT	0	1	0	0	15	50	0	14	0	30	0	11	0	0	0	0	0	2	0	16	35	0	38	2	0	0	35	0	0	0	0	0	0	5
1509	29-Dec-21	19:40:00	1	0	1	0	CT	0	1	0	0	26	0	0	0	0	26	0	0	0	2	0	0	0	13	0	34	10	0	21	19	0	0	4	0	0	0	0	18	0	0
1510	29-Dec-21	19:45:00	1	0	1	0	CT	0	1	0	0	0	0	0	40	0	10	69	2	2	0	0	0	4	52	0	48	24	0	33	12	0	0	38	0	0	13	0	31	0	2
1511	29-Dec-21	19:50:00	1	0	1	0	CT	0	1	0	0	2	44	0	31	0	0	44	8	0	1	0	0	54	56	0	3	2	0	23	6	0	0	10	0	0	37	0	10	0	2
1512	29-Dec-21	19:55:00	1	0	1	0	CT	0	1	0	0	16	27	5	26	0	0	53	0	0	2	0	0	24	53	0	20	2	0	27	0	0	0	72	0	0	31	0	0	0	0
1513	29-Dec-21	20:00:00	1	0	1	0	CT	0	1	0	0	22	20	0	38	0	0	0	2	2	7	0	0	33	11	0	2	2	0	28	0	0	0	19	0	0	46	6	15	0	0
1514	29-Dec-21	20:05:00	1	0	1	0	CT	0	1	17	34	9	3	0	2	1	16	0	0	47	23	0	0	9	0	0	3	0	0	1	0	0	2	0	0	0	0	10	1	0	0
1515	29-Dec-21	20:10:00	1	0	1	0	CT	0	0	117	22	66	23	60	8	0	0	46	0	0	67	0	0	0	0	0	0	0	0	0	0	0	48	31	0	0	13	24	0	1	0
1516	29-Dec-21	20:15:00	1	0	1	0	CT	0	0	67	28	39	5	68	0	7	1	57	0	0	48	0	0	0	0	0	47	68	13	0	0	0	51	0	0	0	0	0	0	38	32
1517	29-Dec-21	20:20:00	1	0	1	0	CT	0	0	50	63	42	50	42	0	35	0	49	0	9	45	44	0	38	0	0	51	87	10	0	14	0	40	0	0	0	0	3	0	0	0
1518	29-Dec-21	20:25:00	1	0	1	0	CT	0	0	35	71	55	22	57	0	17	0	35	0	20	65	42	0	0	0	0	19	52	40	0	34	0	0	5	0	48	0	5	0	3	6
1519	29-Dec-21	20:30:00	1	0	1	0	CT	0	0	3	32	62	0	45	0	33	0	0	0	1	23	60	0	0	0	0	16	97	16	0	5	0	24	63	0	46	0	62	0	34	39
1520	29-Dec-21	20:35:00	1	0	1	0	CT	0	0	8	24	29	0	84	0	23	5	0	0	7	14	72	0	32	0	0	36	58	0	3	14	0	0	63	8	63	0	95	0	0	11
1521	29-Dec-21	20:40:00	1	0	1	0	CT	0	0	64	12	45	30	70	0	14	57	29	0	0	11	73	0	70	0	0	59	75	0	19	56	0	0	63	0	45	0	22	0	38	0
1522	29-Dec-21	20:45:00	1	0	1	0	CT	0	0	22	0	34	56	62	11	24	44	52	8	0	40	53	0	63	0	0	62	74	23	79	22	0	0	96	40	23	28	37	0	25	0
1523	29-Dec-21	20:50:00	1	0	1	0	CT	0	0	12	24	42	23	62	0	22	24	0	27	0	39	66	6	5	0	0	77	61	19	24	25	0	49	102	65	0	11	0	0	19	21
1524	29-Dec-21	20:55:00	1	0	1	0	CT	0	0	17	40	14	31	45	0	42	49	25	57	8	31	72	0	36	0	0	6	68	34	74	73	0	57	47	22	0	0	0	0	1	0
1525	29-Dec-21	21:00:00	1	0	1	0	CT	0	0	23	23	4	0	11	61	24	55	97	0	32	21	41	0	51	0	0	60	60	29	30	11	0	61	57	0	0	0	0	0	41	0
1526	29-Dec-21	21:05:00	1	0	1	0	CT	0	0	19	10	34	34	40	63	22	23	60	11	10	28	42	41	45	0	0	35	83	33	1	6	0	0	43	45	0	0	28	0	18	0
1527	29-Dec-21	21:10:00	1	0	1	0	CT	0	0	24	0	34	34	69	54	35	17	43	54	4	25	55	27	0	0	0	0	63	51	6	7	0	0	80	25	14	2	87	0	27	0
1528	29-Dec-21	21:15:00	1	0	1	0	CT	0	0	19	23	15	2	35	28	30	45	25	119	44	11	41	18	0	0	0	57	101	15	10	12	0	0	76	23	30	0	78	0	32	0
1529	29-Dec-21	21:20:00	1	0	1	0	CT	0	0	29	55	40	58	19	61	37	29	10	17	42	14	94	0	0	50	0	64	70	66	0	45	0	26	52	45	60	0	25	46	26	16
1530	29-Dec-21	21:25:00	1	0	1	0	CT	0	0	75	0	72	17	59	0	34	5	17	3	30	17	38	5	0	52	0	46	70	31	5	33	0	20	4	32	77	0	64	45	17	36
1531	29-Dec-21	21:30:00	1	0	1	0	CT	0	0	2	16	18	19	15	41	22	75	75	26	37	57	55	8	19	8	0	24	74	27	62	18	0	2	34	0	35	16	46	5	8	1
1532	29-Dec-21	21:35:00	1	0	1	0	CT	0	0	7	20	8	43	43	24	24	24	30	95	31	37	54	40	47	59	0	64	43	16	16	55	0	32	59	39	82	16	31	70	1	3
1533	29-Dec-21	21:40:00	1	0	1	0	CT	0	0	38	24	55	20	18	10	42	31	0	63	42	17	23	0	48	18	0	26	81	13	3	35	0	0	0	13	62	55	102	42	52	6
1534	29-Dec-21	21:45:00	1	0	1	0	CT	0	0	5	0	32	14	54	46	77	17	0	73	29	28	42	0	63	30	0	68	68	28	0	53	0	0	2	25	36	48	27	0	43	10
1535	29-Dec-21	21:50:00	1	0	1	0	CT	0	0	45	0	69	0	47	9	73	37	79	28	14	1	49	29	46	21	0	41	72	10	3	73	0	0	29	22	23	12	5	36	4	4
1536	29-Dec-21	21:55:00	1	0	1	0	CT	0	0	11	0	43	7	57	24	60	46	56	43	27	14	61	15	64	19	0	38	67	2	86	16	0	34	61	35	9	6	0	9	69	12
1537	29-Dec-21	22:00:00	1	0	1	0	CT	0	0	34	4	49	50	46	29	31	69	75	43	8	24	46	0	38	18	0	34	46	32	5	12	0	41	31	54	40	1	0	0	33	29
1538	29-Dec-21	22:05:00	1	0	1	0	CT	0	0	12	0	52	5	15	50	20	27	4	19	1	9	40	0	48	0	0	52	71	27	25	39	0	32	75	11	17	1	60	0	52	4
1539	29-Dec-21	22:10:00	1	0	1	0	CT	0	0	43	0	66	15	23	31	23	55	0	63	0	11	76	25	62	0	0	39	93	23	30	59	0	30	14	4	21	33	75	0	42	3
1540	29-Dec-21	22:15:00	1	0	1	0	CT	0	0	7	16	49	13	27	21	42	62	0	44	1	18	45	40	76	0	0	21	69	38	63	0	0	7	35	63	51	31	79	0	6	13
1541	29-Dec-21	22:20:00	1	0	1	0	CT	0	0	9	4	25	24	44	16	7	72	0	16	0	27	24	21	4	0	0	43	69	26	3	4	0	2	42	11	32	14	6	0	67	28
1542	29-Dec-21	22:25:00	1	0	1	0	CT	0	0	16	42	44	0	31	32	36	33	0	23	39	78	0	7	0	38	0	24	41	24	22	0	0	1	32	31	18	1	4	0	52	6
1543	29-Dec-21	22:30:00	1	0	1	0	CT	0	0	17	49	0	3	56	11	23	28	0	13	44	5	46	3	2	22	0	46	61	26	13	28	0	28	5	18	25	28	0	0	40	14
1544	29-Dec-21	22:35:00	1	0	1	0	CT	0	0	12	59	27	18	36	25	45	2	16	47	13	37	54	12	17	16	0	32	86	36	0	38	0	34	1	65	64	45	31	0	19	0
1545	29-Dec-21	22:40:00	1	0	1	0	CT	0	0	0	41	20	8	25	35	69	0	49	19	35	13	50	22	0	5	0	46	38	59	0	40	0	15	55	51	64	13	47	10	0	0
1546	29-Dec-21	22:45:00	1	0	1	0	CT	0	0	1	0	26	33	48	49	35	0	2	6	25	20	43	5	50	18	0	43	89	37	28	13	0	0	67	15	47	66	70	0	0	0
1547	29-Dec-21	22:50:00	1	0	1	0	CT	0	0	16	0	27	27	52	126	27	0	0	0	54	79	39	0	80	47	0	59	70	0	34	5	0	17	71	15	39	22	53	0	0	0
1548	29-Dec-21	22:55:00	1	0	1	0	CT	0	0	10	0	58	3	77	60	40	0	14	6	4	68	56	10	84	38	0	31	37	39	28	14	0	69	94	28	34	11	29	0	38	0
1549	29-Dec-21	23:00:00	1	0	1	0	CT	0	0	16	21	12	0	24	23	24	0	0	19	24	59	45	21	27	0	0	73	52	25	2	61	0	20	68	17	34	0	12	0	9	0
1550	29-Dec-21	23:05:00	1	0	1	0	CT	0	0	1	0	30	24	78	35	17	0	2	70	32	37	28	16	36	2	0	41	59	11	26	31	0	0	28	0	27	37	51	0	0	0
1551	29-Dec-21	23:10:00	1	0	1	0	CT	0	0	24	0	22	8	29	40	14	0	59	58	28	20	44	1	51	14	0	37	73	50	10	14	0	31	101	49	33	28	22	0	44	1
1552	29-Dec-21	23:15:00	1	0	1	0	CT	0	0	6	0	56	17	51	25	20	0	24	5	31	11	14	42	52	50	0	49	75	56	73	0	0	46	58	40	27	9	73	0	3	0
1553	29-Dec-21	23:20:00	1	0	1	0	CT	0	0	8	0	12	0	64	21	23	0	60	15	22	15	39	0	0	15	0	39	55	48	6	11	0	47	11	11	38	29	43	0	8	0
1554	29-Dec-21	23:25:00	1	0	1	0	CT	0	0	76	0	0	13	16	50	29	15	1	17	8	73	48	0	0	30	0	70	90	7	17	54	0	0	16	35	30	7	0	0	32	0
1555	29-Dec-21	23:30:00	1	0	1	0	CT	0	0	6	0	53	66	44	63	39	15	12	40	0	37	49	0	0	34	0	54	69	10	0	0	0	21	55	37	67	22	35	0	0	0
1556	29-Dec-21	23:35:00	1	0	1	0	CT	0	0	10	0	76	0	9	0	38	61	0	36	0	42	52	0	5	0	0	58	69	22	0	14	0	39	63	6	48	25	9	0	0	0
1557	29-Dec-21	23:40:00	1	0	1	0	CT	0	0	23	0	52	14	50	0	66	45	0	15	0	52	25	0	58	17	0	84	66	36	50	12	0	12	10	0	55	22	0	0	44	0
1558	29-Dec-21	23:45:00	1	0	1	0	CT	0	0	0	0	28	0	66	0	38	73	0	23	0	28	101	0	40	44	0	61	66	19	45	0	0	43	43	31	81	4	0	0	19	0
1559	29-Dec-21	23:50:00	1	0	1	0	CT	0	0	0	0	85	0	50	0	24	21	0	4	0	23	44	4	20	51	0	52	63	0	2	0	0	89	87	42	58	80	27	0	20	0
1560	29-Dec-21	23:55:00	1	0	1	0	CT	0	0	0	0	59	0	84	0	27	34	0	5	0	47	46	0	53	14	0	49	59	0	8	0	0	21	31	29	51	45	73	0	2	38
1561	30-Dec-21	0:00:00	1	0	1	0	CT	0	0	0	0	67	0	66	0	13	60	0	21	0	49	43	20	67	0	0	57	86	0	5	0	0	18	63	37	41	51	32	0	23	2
1562	30-Dec-21	0:05:00	1	0	1	0	CT	0	0	0	0	62	0	56	0	46	17	0	16	0	34	38	0	25	63	0	40	73	2	21	0	0	45	2	18	22	36	0	0	19	1
1563	30-Dec-21	0:10:00	1	0	1	0	CT	0	0	0	0	54	0	51	0	27	72	0	12	0	0	65	0	0	93	0	55	73	29	44	21	0	22	10	27	28	26	0	1	0	1
1564	30-Dec-21	0:15:00	1	0	1	0	CT	0	0	0	0	84	6	60	1	73	8	0	4	0	22	53	0	0	49	0	26	81	34	31	33	0	38	0	0	18	24	11	16	0	0
1565	30-Dec-21	0:20:00	1	0	1	0	CT	0	0	0	0	51	23	0	66	37	53	0	32	0	28	19	0	0	63	0	74	78	0	8	15	0	51	6	10	28	0	82	0	0	28
1566	30-Dec-21	0:25:00	1	0	1	0	CT	0	0	0	0	51	0	63	72	50	48	0	23	0	24	78	0	30	21	0	66	67	0	3	0	0	25	0	18	27	0	31	0	0	0
1567	30-Dec-21	0:30:00	1	0	1	0	CT	0	0	0	0	61	0	92	3	27	52	6	15	0	0	46	0	11	0	0	55	78	0	15	0	0	10	2	0	9	0	41	0	0	8
1568	30-Dec-21	0:35:00	1	0	1	0	CT	0	0	0	0	67	0	76	3	37	65	35	9	0	0	34	0	63	0	0	68	57	0	17	0	0	43	0	0	0	0	0	0	0	29
1569	30-Dec-21	0:40:00	1	0	1	0	CT	0	0	0	0	36	0	37	17	41	44	0	12	0	0	57	0	23	0	0	18	81	0	0	0	0	30	3	0	0	0	29	0	54	0
1570	30-Dec-21	0:45:00	1	0	1	0	CT	0	0	0	0	79	0	79	32	27	67	0	0	0	0	40	0	0	0	0	73	53	0	0	36	0	17	0	1	0	0	89	0	4	0
1571	30-Dec-21	0:50:00	1	0	1	0	CT	0	0	0	0	63	0	28	0	69	62	0	0	0	0	39	0	0	0	0	18	84	0	0	63	0	26	0	0	0	0	28	0	16	0
1572	30-Dec-21	0:55:00	1	0	1	0	CT	0	0	0	0	0	0	36	0	74	29	0	0	0	0	16	0	4	0	0	62	68	0	0	0	0	27	0	0	0	0	35	0	0	1
1573	30-Dec-21	1:00:00	1	0	1	0	CT	0	0	0	0	0	0	62	0	9	29	3	0	0	0	88	0	3	0	0	42	74	0	0	2	0	0	17	1	0	0	42	0	4	0
1574	30-Dec-21	1:05:00	1	0	1	0	CT	0	0	0	0	0	0	81	0	41	11	40	0	8	5	47	0	5	0	0	47	56	0	0	0	0	0	2	0	0	0	5	0	0	1
1575	30-Dec-21	1:10:00	1	0	1	0	CT	0	0	0	0	1	0	83	0	7	36	1	0	4	2	17	0	5	0	0	15	77	0	0	25	0	0	0	2	0	0	42	0	0	1
1576	30-Dec-21	1:15:00	1	0	1	0	CT	0	0	0	0	31	0	77	0	29	0	3	0	0	10	0	0	1	7	0	35	79	0	4	48	0	0	5	0	0	0	23	1	1	9
1577	30-Dec-21	1:20:00	1	0	1	0	CT	0	0	25	0	83	0	48	0	20	0	0	0	0	0	0	0	2	51	0	41	56	0	31	24	0	0	12	10	0	0	14	0	0	0
1578	30-Dec-21	1:25:00	1	0	1	0	CT	0	0	43	0	41	0	63	0	27	0	0	0	10	0	0	0	0	39	0	37	64	0	10	54	0	0	2	0	0	0	5	0	0	2
1579	30-Dec-21	1:30:00	1	0	1	0	CT	0	0	59	0	63	0	52	0	1	0	0	0	0	3	0	0	0	0	0	0	71	0	2	23	0	0	0	0	0	0	43	0	0	2
1580	30-Dec-21	1:35:00	1	0	1	0	CT	0	0	0	0	1	0	69	0	5	0	0	0	0	0	0	0	7	1	0	0	57	0	0	34	0	0	0	1	0	0	61	0	0	0
1581	30-Dec-21	1:40:00	1	0	1	0	CT	0	0	0	0	2	0	54	0	0	0	0	0	0	1	0	0	8	0	0	0	64	0	0	34	0	0	0	0	0	0	34	0	0	0
1582	30-Dec-21	1:45:00	1	0	1	0	CT	0	0	0	0	2	0	9	0	0	0	0	0	0	0	0	0	3	14	0	0	60	0	0	4	0	0	0	0	0	0	90	0	0	1
1583	30-Dec-21	1:50:00	1	0	1	0	CT	0	0	0	0	1	0	44	0	0	0	0	0	0	1	0	0	0	5	0	0	73	0	0	0	0	51	0	3	0	0	26	0	0	0
1584	30-Dec-21	1:55:00	1	0	1	0	CT	0	0	0	0	3	0	66	0	0	0	0	0	11	0	0	0	0	18	0	38	40	0	1	63	0	0	0	0	44	0	30	0	0	0
1585	30-Dec-21	2:00:00	1	0	1	0	CT	0	0	0	0	0	0	7	0	0	0	5	0	14	0	0	0	0	15	0	59	53	0	1	2	0	0	2	0	0	0	0	0	0	16
1586	30-Dec-21	2:05:00	1	0	1	0	CT	0	0	0	0	9	0	20	0	0	0	6	0	0	0	0	42	0	0	0	47	34	3	0	0	0	0	0	2	0	0	9	1	0	1
1587	30-Dec-21	2:10:00	1	0	1	0	CT	0	0	0	0	26	4	3	0	0	0	0	0	0	0	0	0	0	0	0	2	85	7	3	0	0	0	4	0	0	0	0	0	0	1
1588	30-Dec-21	2:15:00	1	0	1	0	CT	0	0	0	0	1	5	0	0	0	0	0	0	0	5	0	0	0	0	0	46	19	13	0	0	0	0	1	0	0	0	26	0	0	0
1589	30-Dec-21	2:20:00	1	0	1	0	CT	0	0	0	0	31	0	0	0	0	0	7	0	0	25	0	0	0	1	0	20	49	0	0	0	0	0	0	0	0	0	20	0	0	0
1590	30-Dec-21	2:25:00	1	0	1	0	CT	0	0	0	0	1	0	2	0	0	0	51	0	0	0	0	0	0	0	0	0	64	0	0	0	0	34	0	1	0	0	44	1	0	0
1591	30-Dec-21	2:30:00	1	0	1	0	CT	0	0	0	0	0	10	1	0	0	0	18	0	0	0	0	0	0	0	0	0	75	4	0	0	0	25	0	2	0	0	3	0	0	0
1592	30-Dec-21	2:35:00	1	0	1	0	CT	0	0	0	0	0	0	2	0	0	31	0	0	0	0	0	5	0	16	0	0	24	0	15	0	0	63	5	1	0	0	0	0	0	0
1593	30-Dec-21	2:40:00	1	0	1	0	CT	0	0	28	0	1	0	36	56	0	61	0	1	0	0	0	0	0	4	0	0	0	0	0	0	0	0	11	0	0	0	44	0	0	0
1594	30-Dec-21	2:45:00	1	0	1	0	CT	0	0	2	0	0	0	24	67	1	40	1	10	0	0	0	0	0	63	0	1	0	0	0	0	0	0	48	4	0	0	3	0	0	0
1595	30-Dec-21	2:50:00	1	0	1	0	CT	0	0	0	0	0	25	0	0	79	0	2	11	0	2	0	0	0	0	0	0	0	0	3	0	0	0	63	20	2	0	49	0	0	0
1596	30-Dec-21	2:55:00	1	0	1	0	CT	0	0	0	0	0	0	1	0	66	0	1	5	0	0	0	0	0	0	0	0	0	0	13	0	0	0	42	21	16	0	16	0	14	0
1597	30-Dec-21	3:00:00	1	0	1	0	CT	0	0	0	0	0	2	0	0	31	0	2	24	0	0	0	7	0	8	0	0	0	0	0	20	0	0	9	0	2	0	47	0	0	0
1598	30-Dec-21	3:05:00	1	0	1	0	CT	0	0	0	0	0	15	2	0	10	0	0	7	0	0	0	0	0	0	0	2	0	0	0	46	0	0	1	0	12	0	34	0	0	0
1599	30-Dec-21	3:10:00	1	0	1	0	CT	0	0	0	0	0	0	0	25	85	0	0	18	0	0	0	9	0	0	0	0	0	0	5	66	0	0	0	0	57	0	28	1	0	0
1600	30-Dec-21	3:15:00	1	0	1	0	CT	0	0	0	0	0	0	0	45	53	3	0	0	0	19	0	0	0	0	0	1	0	0	0	1	0	0	3	0	74	0	33	23	0	0
1601	30-Dec-21	3:20:00	1	0	1	0	CT	0	0	62	0	0	0	0	17	37	2	2	3	5	0	0	12	0	0	0	0	0	0	5	0	0	0	0	0	33	0	23	36	0	0
1602	30-Dec-21	3:25:00	1	0	1	0	CT	0	0	0	0	37	0	3	63	50	0	0	0	0	0	0	0	15	74	0	0	0	0	1	5	0	0	0	7	39	0	2	59	0	0
1603	30-Dec-21	3:30:00	1	0	1	0	CT	0	0	0	0	0	0	1	3	121	0	0	0	0	0	0	1	53	0	0	0	2	0	1	18	0	0	3	10	58	0	4	10	0	0
1604	30-Dec-21	3:35:00	1	0	1	0	CT	0	0	0	0	4	0	17	0	2	0	0	0	0	0	0	3	18	0	0	0	0	0	18	0	0	0	0	23	5	0	6	17	13	0
1605	30-Dec-21	3:40:00	1	0	1	0	CT	0	0	0	0	0	0	0	0	0	3	0	0	0	0	0	0	4	0	0	0	0	5	0	0	0	0	0	16	0	0	4	0	7	0
1606	30-Dec-21	3:45:00	1	0	1	0	CT	0	0	0	0	1	0	0	0	0	4	0	2	0	6	0	0	0	0	0	0	5	28	0	0	0	0	63	23	46	0	63	0	36	0
1607	30-Dec-21	3:50:00	1	0	1	0	CT	0	0	0	0	0	0	0	0	0	0	0	1	0	0	0	0	0	0	0	15	2	0	0	0	0	0	5	2	35	0	51	0	0	0
1608	30-Dec-21	3:55:00	1	0	1	0	CT	0	0	0	0	3	0	0	0	2	0	0	40	0	1	0	5	0	0	0	50	0	0	0	0	0	0	28	41	42	0	31	0	2	0
1609	30-Dec-21	4:00:00	1	0	1	0	CT	0	0	0	0	0	0	0	0	0	0	0	7	0	28	0	6	12	0	0	19	0	0	1	13	0	0	0	4	25	0	3	0	5	0
1610	30-Dec-21	4:05:00	1	0	1	0	CT	0	0	0	0	3	0	0	6	1	0	0	0	0	45	0	0	18	0	0	0	24	0	0	39	0	0	0	0	8	0	31	0	0	0
1611	30-Dec-21	4:10:00	1	0	1	0	CT	0	0	0	0	5	0	0	63	0	9	2	0	0	4	0	0	2	0	0	58	35	0	0	9	0	0	0	0	0	0	64	0	9	0
1612	30-Dec-21	4:15:00	1	0	1	0	CT	0	0	63	0	0	0	0	16	1	37	16	3	0	1	4	0	0	0	0	36	47	0	0	0	0	0	0	1	0	0	97	0	0	0
1613	30-Dec-21	4:20:00	1	0	1	0	CT	0	0	4	0	0	0	0	8	0	57	77	0	0	0	23	0	10	8	0	38	12	0	0	14	0	0	0	3	0	0	16	0	0	7
1614	30-Dec-21	4:25:00	1	0	1	0	CT	0	0	0	0	0	3	0	7	4	45	0	0	6	1	39	0	0	7	0	35	0	0	2	45	0	0	0	0	0	0	5	0	0	0
1615	30-Dec-21	4:30:00	1	0	1	0	CT	0	0	0	0	0	0	0	9	6	46	0	0	6	0	0	1	0	0	0	27	0	9	8	10	0	0	20	9	0	0	38	0	0	0
1616	30-Dec-21	4:35:00	1	0	1	0	CT	0	0	0	0	0	0	0	13	2	38	0	0	0	0	46	9	0	0	0	0	0	33	20	0	0	59	20	61	0	0	0	0	0	0
1617	30-Dec-21	4:40:00	1	0	1	0	CT	0	0	0	0	0	23	0	38	0	8	0	0	0	0	42	0	0	4	0	32	0	0	1	10	0	0	7	0	0	0	0	0	1	0
1618	30-Dec-21	4:45:00	1	0	1	0	CT	0	0	0	0	0	43	0	57	0	0	0	0	0	0	49	0	27	4	0	1	0	2	0	32	0	0	0	0	0	0	0	0	8	0
1619	30-Dec-21	4:50:00	1	0	1	0	CT	0	0	0	0	0	30	22	58	0	0	0	2	3	0	60	0	0	0	0	0	27	0	0	45	0	0	2	0	0	0	0	0	1	0
1620	30-Dec-21	4:55:00	1	0	1	0	CT	0	0	0	0	10	14	17	60	0	0	0	0	3	0	40	13	3	63	0	0	19	0	0	30	0	0	0	0	0	0	0	0	9	0
1621	30-Dec-21	5:00:00	1	0	1	0	CT	0	0	0	0	0	11	0	0	2	0	0	0	0	0	47	0	0	69	0	0	0	0	0	20	0	0	1	0	0	0	0	0	2	0
1622	30-Dec-21	5:05:00	1	0	1	0	CT	0	0	0	0	0	6	0	2	31	0	0	2	0	23	33	20	1	27	0	0	0	0	1	38	0	0	0	0	0	0	0	0	0	0
1623	30-Dec-21	5:10:00	1	0	1	0	CT	0	0	0	0	0	0	0	1	0	0	0	1	0	0	25	0	35	0	0	3	0	0	0	0	0	0	0	0	0	0	0	0	0	0
1624	30-Dec-21	5:15:00	1	0	1	0	CT	0	0	35	0	0	0	0	37	0	0	0	53	1	63	10	3	94	0	0	24	0	0	0	0	0	1	0	0	0	0	0	0	0	0
1625	30-Dec-21	5:20:00	1	0	1	0	CT	0	0	54	0	12	0	0	0	0	0	0	48	0	0	0	0	66	2	0	92	7	0	1	0	0	0	0	1	0	0	12	0	0	3
1626	30-Dec-21	5:25:00	1	0	1	0	CT	0	0	26	0	6	0	0	0	1	18	0	0	0	0	0	0	51	0	0	73	0	1	0	0	0	0	0	0	0	0	30	0	0	7
1627	30-Dec-21	5:30:00	1	0	1	0	CT	0	0	8	0	63	0	0	48	2	24	6	0	0	0	0	0	41	0	0	4	0	1	0	4	0	0	0	0	13	0	67	0	1	27
1628	30-Dec-21	5:35:00	1	0	1	0	CT	0	0	1	0	45	0	0	0	0	0	8	0	0	10	0	0	40	9	0	25	0	31	0	15	0	2	0	0	51	0	87	0	23	0
1629	30-Dec-21	5:40:00	1	0	1	0	CT	0	0	5	0	1	0	0	0	0	0	0	0	0	0	0	0	69	0	0	68	0	6	1	13	0	0	0	0	24	0	62	3	17	0
1630	30-Dec-21	5:45:00	1	0	1	0	CT	0	0	8	0	0	0	0	0	0	0	5	2	0	0	0	4	5	2	0	44	0	0	0	24	0	0	0	2	0	0	61	45	22	0
1631	30-Dec-21	5:50:00	1	0	1	0	CT	0	0	3	0	23	0	0	0	3	0	62	7	0	0	0	0	7	1	0	27	3	0	3	12	0	1	0	0	0	0	60	23	31	0
1632	30-Dec-21	5:55:00	1	0	1	0	CT	0	0	5	0	40	0	0	9	29	0	0	3	0	0	0	0	13	0	0	58	0	0	3	0	0	0	0	5	0	0	40	37	2	13
1633	30-Dec-21	6:00:00	1	0	1	0	CT	0	0	0	0	0	0	0	54	39	0	1	0	22	0	0	0	3	1	0	8	0	0	0	63	0	0	11	0	0	0	18	55	73	9
1634	30-Dec-21	6:05:00	1	0	1	0	CT	0	0	0	0	0	0	8	0	8	0	0	10	2	0	0	0	0	0	0	0	8	0	34	9	0	0	63	36	0	0	10	2	52	10
1635	30-Dec-21	6:10:00	1	0	1	0	CT	0	0	1	0	1	0	2	2	69	13	0	0	0	0	0	0	9	0	0	0	1	0	48	0	0	10	36	0	0	0	0	0	31	0
1636	30-Dec-21	6:15:00	1	0	1	0	CT	0	0	1	0	0	0	0	45	21	42	0	3	0	0	0	0	50	0	0	0	3	0	35	3	0	38	70	0	1	0	44	0	0	0
1637	30-Dec-21	6:20:00	1	0	1	0	CT	0	0	7	0	1	63	4	18	71	2	0	0	0	0	0	0	0	0	0	0	5	0	50	0	0	33	121	0	36	0	57	0	0	0
1638	30-Dec-21	6:25:00	1	0	1	0	CT	0	0	5	0	3	50	0	20	15	12	2	5	0	0	0	0	0	0	0	0	0	0	12	2	0	0	58	28	0	0	60	0	4	0
1639	30-Dec-21	6:30:00	1	0	1	0	CT	0	0	58	0	0	36	0	42	0	7	1	0	5	0	0	0	0	0	0	0	1	0	10	0	0	1	48	23	0	0	0	35	0	0
1640	30-Dec-21	6:35:00	1	0	1	0	CT	0	0	10	0	46	43	0	19	0	0	1	0	1	0	0	0	0	10	0	0	0	0	0	0	0	4	76	3	0	5	0	18	0	0
1641	30-Dec-21	6:40:00	1	0	1	0	CT	0	0	3	43	35	1	10	44	0	0	0	0	0	0	0	1	0	33	0	0	1	0	0	0	0	2	71	2	0	22	0	0	0	0
1642	30-Dec-21	6:45:00	1	0	1	0	CT	0	0	1	16	11	0	36	36	0	0	0	0	0	0	0	10	0	46	0	0	0	0	0	0	0	4	43	0	0	0	3	0	0	8
1643	30-Dec-21	6:50:00	1	0	1	0	CT	0	0	1	63	0	0	49	4	0	0	1	0	0	11	0	3	0	0	0	19	0	0	1	0	0	0	0	0	0	0	7	0	0	31
1644	30-Dec-21	6:55:00	1	0	1	0	CT	0	0	15	11	0	0	69	35	0	0	0	5	0	13	3	0	0	2	0	0	0	0	11	0	0	0	0	17	7	0	1	1	0	13
1645	30-Dec-21	7:00:00	1	0	1	0	CT	0	0	0	0	0	0	85	36	0	0	5	0	0	2	33	6	0	0	0	0	2	0	0	0	0	0	0	0	35	0	0	0	0	20
1646	30-Dec-21	7:05:00	1	0	1	0	CT	0	0	0	5	0	1	82	20	0	0	0	0	0	43	35	0	0	0	0	0	19	0	0	0	0	0	0	14	42	0	0	0	0	0
1647	30-Dec-21	7:10:00	1	0	1	0	CT	0	0	0	0	0	5	67	24	0	0	0	0	1	18	42	51	46	15	0	0	72	0	2	0	0	0	0	11	76	0	19	0	0	0
1648	30-Dec-21	7:15:00	1	0	1	0	CT	0	0	0	0	33	38	18	0	0	0	53	0	0	0	47	19	60	25	0	1	64	0	3	0	0	0	1	0	7	0	6	0	0	0
1649	30-Dec-21	7:20:00	1	0	1	0	CT	0	0	0	0	16	1	77	1	0	0	70	6	0	0	43	11	57	33	0	2	27	0	1	70	0	11	1	7	53	0	0	0	10	0
1650	30-Dec-21	7:25:00	1	0	1	0	CT	0	0	0	0	0	11	39	57	0	0	0	1	18	0	43	21	73	0	0	0	54	0	56	85	0	47	0	63	37	0	0	0	12	0
1651	30-Dec-21	7:30:00	1	0	1	0	CT	0	0	0	0	40	57	0	33	0	0	22	0	5	86	55	6	9	0	0	18	46	4	13	9	0	2	0	0	6	11	0	32	0	0
1652	30-Dec-21	7:35:00	1	0	1	0	CT	0	0	0	0	7	27	0	24	0	0	28	5	0	31	58	0	13	20	0	45	41	20	0	10	0	1	2	0	4	0	17	28	0	0
1653	30-Dec-21	7:40:00	1	0	1	0	CT	0	0	12	0	19	32	0	59	0	0	34	1	0	49	73	0	66	65	0	25	56	25	0	6	0	1	1	0	42	0	1	63	0	0
1654	30-Dec-21	7:45:00	1	0	1	0	CT	0	0	49	0	6	40	0	8	0	0	28	0	0	8	12	0	23	5	0	29	46	34	0	36	0	0	33	21	37	0	1	0	0	0
1655	30-Dec-21	7:50:00	1	0	1	0	CT	0	0	7	0	0	24	0	37	0	0	0	3	0	0	48	0	0	0	0	26	38	0	1	13	0	1	17	0	13	0	15	0	0	6
1656	30-Dec-21	7:55:00	1	0	1	0	CT	0	0	26	0	6	0	0	45	0	0	0	0	0	0	28	0	38	0	0	4	62	75	24	0	0	0	43	4	14	0	0	0	0	10
1657	30-Dec-21	8:00:00	1	0	1	0	CT	0	0	13	4	58	11	0	15	0	0	0	0	0	0	20	0	11	0	0	0	37	12	39	25	0	1	66	4	11	7	0	2	0	0
1658	30-Dec-21	8:05:00	1	0	1	0	CT	0	1	19	74	45	18	39	41	18	21	12	23	43	32	62	15	69	49	0	45	75	62	120	31	0	39	58	60	34	43	83	39	41	25
1659	30-Dec-21	8:10:00	1	0	1	0	CT	0	1	0	51	36	20	48	36	40	70	64	48	20	49	88	87	72	46	0	68	87	50	73	10	0	32	41	63	61	48	73	49	47	11
1660	30-Dec-21	8:15:00	1	0	1	0	CT	0	1	4	20	86	19	79	48	37	56	82	52	54	48	57	28	49	24	0	53	79	0	55	1	0	59	33	80	75	39	29	24	12	13
1661	30-Dec-21	8:20:00	1	0	1	0	CT	0	1	0	32	60	54	60	63	34	60	21	67	2	57	69	37	0	29	0	47	41	0	42	0	0	22	66	35	86	30	34	0	49	1
1662	30-Dec-21	8:25:00	1	0	1	0	CT	0	1	1	19	40	20	59	31	94	32	0	33	7	51	69	20	0	53	0	29	49	0	24	0	0	25	44	63	43	32	53	13	36	6
1663	30-Dec-21	8:30:00	1	0	1	0	CT	0	1	0	0	63	24	43	42	45	82	0	20	0	51	30	10	0	38	0	61	21	0	20	0	0	27	63	63	36	21	51	1	42	39
1664	30-Dec-21	8:35:00	1	0	1	0	CT	0	1	0	10	60	20	26	51	40	49	0	9	3	3	64	1	0	37	0	11	28	0	86	0	0	2	0	10	43	24	0	20	17	32
1665	30-Dec-21	8:40:00	1	0	1	0	CT	0	1	18	4	27	15	0	27	34	52	0	22	43	31	50	16	0	18	0	40	32	0	34	0	0	20	20	51	61	29	0	9	16	3
1666	30-Dec-21	8:45:00	1	0	1	0	CT	0	1	5	32	47	4	0	33	18	37	0	29	40	3	43	0	0	36	0	30	0	0	22	26	0	24	1	70	38	55	0	0	25	0
1667	30-Dec-21	8:50:00	1	0	1	0	CT	0	1	4	14	21	9	0	51	38	73	0	23	12	0	35	15	0	26	0	27	0	0	5	29	0	9	0	27	63	7	0	0	32	0
1668	30-Dec-21	8:55:00	1	0	1	0	CT	0	1	63	25	8	27	2	16	27	44	0	19	10	6	54	61	8	61	0	36	0	0	17	5	0	0	6	20	34	40	0	0	9	0
1669	30-Dec-21	9:00:00	1	0	1	0	CT	0	1	11	0	11	18	0	49	22	39	0	20	38	0	28	22	34	79	0	6	0	0	7	0	0	0	0	68	28	29	0	15	19	59
1670	30-Dec-21	9:05:00	1	0	1	0	CT	0	1	20	24	82	20	0	32	12	66	0	7	37	0	39	28	7	44	0	41	0	0	11	0	0	0	0	14	22	28	0	27	45	1
1671	30-Dec-21	9:10:00	1	0	1	0	CT	0	1	0	15	25	25	0	25	34	30	21	9	3	9	61	13	0	10	0	37	0	0	63	0	0	0	0	79	38	32	46	0	0	54
1672	30-Dec-21	9:15:00	1	0	1	0	CT	0	1	0	32	56	19	1	36	27	0	70	3	0	0	25	30	0	33	0	18	0	41	22	0	0	0	0	47	40	11	0	0	26	4
1673	30-Dec-21	9:20:00	1	0	1	0	CT	0	1	0	0	42	15	1	22	55	0	52	0	0	7	37	23	0	14	0	41	1	21	4	0	0	0	0	7	41	34	0	0	8	0
1674	30-Dec-21	9:25:00	1	0	1	0	CT	0	1	0	3	3	17	0	27	39	1	0	0	0	26	57	19	0	4	0	53	27	29	19	0	0	0	0	0	30	28	0	0	53	26
1675	30-Dec-21	9:30:00	1	0	1	0	CT	0	1	0	0	0	21	0	14	19	0	0	2	0	30	30	13	1	34	0	26	28	37	42	0	0	0	0	7	37	39	0	0	33	5
1676	30-Dec-21	9:35:00	1	0	1	0	CT	0	1	0	0	0	10	6	28	23	3	0	16	15	2	41	19	0	11	0	0	53	8	4	0	0	0	1	0	30	11	0	6	24	5
1677	30-Dec-21	9:40:00	1	0	1	0	CT	0	1	0	0	17	3	10	41	60	1	0	24	27	0	16	19	0	2	0	14	18	16	23	0	0	0	0	0	11	56	0	0	39	0
1678	30-Dec-21	9:45:00	1	0	1	0	CT	0	1	22	0	17	25	56	35	35	0	0	23	33	0	41	26	0	49	0	17	0	4	18	0	0	53	0	0	58	26	0	3	22	0
1679	30-Dec-21	9:50:00	1	0	1	0	CT	0	1	53	9	30	15	48	49	29	2	0	43	36	10	42	18	0	22	0	54	0	33	2	16	0	28	7	0	39	15	0	22	47	0
1680	30-Dec-21	9:55:00	1	0	1	0	CT	0	1	0	27	41	5	6	45	19	19	0	40	31	63	44	17	0	36	0	69	0	35	0	63	0	4	4	0	22	19	0	30	0	0
1681	30-Dec-21	10:00:00	1	0	1	0	CT	0	1	0	12	56	28	0	28	63	28	82	60	1	5	39	70	0	12	0	36	1	28	0	25	0	0	2	0	37	12	0	26	40	0
1682	30-Dec-21	10:05:00	1	0	1	0	CT	0	1	0	27	42	16	0	25	34	20	92	9	20	6	38	26	0	11	0	0	3	26	1	13	0	0	48	58	60	7	0	0	25	23
1683	30-Dec-21	10:10:00	1	0	1	0	CT	0	1	0	0	16	61	0	32	21	7	10	26	45	0	16	17	0	10	0	0	0	21	25	48	0	0	45	26	26	19	0	0	14	18
1684	30-Dec-21	10:15:00	1	0	1	0	CT	0	1	0	47	6	26	0	34	21	0	0	0	27	0	7	21	3	51	0	0	0	57	0	26	0	0	111	8	52	9	0	0	34	5
1685	30-Dec-21	10:20:00	1	0	1	0	CT	0	1	22	38	13	18	0	35	42	0	0	0	35	1	0	24	0	31	0	3	0	44	1	0	0	0	64	41	30	22	21	16	23	4
1686	30-Dec-21	10:25:00	1	0	1	0	CT	0	1	1	35	41	9	0	30	23	0	0	0	16	2	3	28	6	15	0	62	0	51	2	0	0	0	105	48	26	7	60	19	22	0
1687	30-Dec-21	10:30:00	1	0	1	0	CT	0	1	0	5	14	19	52	20	19	0	21	1	9	0	48	36	27	18	0	27	0	41	72	0	0	0	9	0	36	23	36	17	14	45
1688	30-Dec-21	10:35:00	1	0	1	0	CT	0	1	5	41	53	10	47	28	26	0	57	0	4	0	2	10	0	20	0	45	0	30	35	3	0	0	15	0	15	20	14	41	3	1
1689	30-Dec-21	10:40:00	1	0	1	0	CT	0	1	0	18	6	22	53	23	53	0	8	0	11	0	0	16	0	27	0	21	0	77	1	1	0	1	51	24	63	27	0	8	0	15
1690	30-Dec-21	10:45:00	1	0	1	0	CT	0	1	0	0	64	15	60	41	24	8	31	0	14	0	16	54	0	19	0	14	0	16	2	6	0	48	25	25	48	1	0	52	37	0
1691	30-Dec-21	10:50:00	1	0	1	0	CT	0	1	3	0	33	1	7	27	19	60	50	0	37	22	17	14	0	29	0	0	0	20	27	23	0	31	36	26	26	13	0	21	39	0
1692	30-Dec-21	10:55:00	1	0	1	0	CT	0	1	8	0	51	6	0	41	23	0	5	25	47	18	0	17	1	32	0	10	69	8	15	32	0	0	4	9	25	12	7	25	28	4
1693	30-Dec-21	11:00:00	1	0	1	0	CT	0	1	6	0	16	26	11	24	24	0	79	23	52	34	18	20	0	20	0	40	51	8	0	0	0	0	0	5	36	7	79	34	28	7
1694	30-Dec-21	11:05:00	1	0	1	0	CT	0	1	1	0	41	20	0	31	31	0	36	67	25	10	7	19	0	25	0	19	50	5	4	0	0	0	19	3	18	28	90	35	24	12
1695	30-Dec-21	11:10:00	1	0	1	0	CT	0	1	1	0	23	15	1	17	30	0	5	37	0	2	35	31	0	53	0	2	1	0	26	0	0	0	72	48	24	20	48	2	23	0
1696	30-Dec-21	11:15:00	1	0	1	0	CT	0	1	2	10	26	22	0	23	32	0	13	4	1	38	9	31	22	29	0	54	0	0	1	0	0	18	71	41	48	40	10	0	23	0
1697	30-Dec-21	11:20:00	1	0	1	0	CT	0	1	7	39	4	9	0	34	35	11	27	63	1	38	14	19	4	27	0	22	0	0	0	0	0	16	63	11	37	10	0	0	0	29
1698	30-Dec-21	11:25:00	1	0	1	0	CT	0	1	0	46	41	8	0	26	19	0	4	30	0	44	0	24	15	17	0	45	0	0	56	0	0	5	83	1	60	10	0	0	10	26
1699	30-Dec-21	11:30:00	1	0	1	0	CT	0	1	0	13	45	15	0	15	10	0	0	21	0	72	0	23	0	0	0	32	0	0	34	1	0	0	57	0	54	16	0	0	0	15
1700	30-Dec-21	11:35:00	1	0	1	0	CT	0	1	0	33	50	0	0	12	44	36	6	13	1	0	0	24	0	3	0	38	1	0	78	0	0	27	2	0	39	26	0	0	25	0
1701	30-Dec-21	11:40:00	1	0	1	0	CT	0	1	44	15	35	0	36	18	36	67	17	31	0	0	0	14	0	20	0	21	0	0	23	0	0	16	0	0	39	23	0	0	38	3
1702	30-Dec-21	11:45:00	1	0	1	0	CT	0	1	0	26	1	8	90	12	26	47	0	9	0	3	3	21	0	55	0	35	13	0	30	0	0	5	34	13	32	15	0	0	20	38
1703	30-Dec-21	11:50:00	1	0	1	0	CT	0	1	0	0	71	0	21	13	10	47	0	63	0	17	23	5	0	21	0	48	42	0	48	0	0	0	63	44	77	15	13	0	22	0
1704	30-Dec-21	11:55:00	1	0	1	0	CT	0	1	0	0	59	0	0	24	62	55	0	0	0	0	16	22	0	7	0	14	46	0	19	0	0	0	63	37	24	16	49	0	17	0
1705	30-Dec-21	12:00:00	1	0	1	0	CT	0	1	0	23	24	0	0	21	33	38	0	0	0	1	20	34	0	0	0	0	85	0	0	0	0	0	5	12	16	15	52	0	30	1
1706	30-Dec-21	12:05:00	1	0	1	0	CT	0	1	0	22	61	0	0	49	30	44	0	0	10	1	38	22	0	18	0	32	56	5	10	2	0	0	15	8	11	41	84	29	27	15
1707	30-Dec-21	12:10:00	1	0	1	0	CT	0	1	0	2	35	0	0	44	32	28	0	11	12	1	11	24	0	44	0	31	52	48	29	26	0	0	1	20	56	48	39	22	24	0
1708	30-Dec-21	12:15:00	1	0	1	0	CT	0	1	0	0	22	7	7	60	18	24	0	4	17	4	26	20	8	23	0	5	16	32	0	18	0	0	0	52	41	12	8	27	12	0
1709	30-Dec-21	12:20:00	1	0	1	0	CT	0	1	0	0	5	7	0	69	16	25	1	0	15	38	0	23	0	7	0	0	0	31	0	63	0	0	0	40	20	5	19	31	0	3
1710	30-Dec-21	12:25:00	1	0	1	0	CT	0	1	0	0	33	9	10	56	10	1	0	4	0	42	12	14	0	6	0	0	0	22	42	15	0	0	0	26	39	36	10	11	0	0
1711	30-Dec-21	12:30:00	1	0	1	0	CT	0	1	0	0	78	18	57	12	22	0	9	0	0	33	0	16	0	25	0	0	0	63	42	0	0	0	0	18	52	10	0	28	4	0
1712	30-Dec-21	12:35:00	1	0	1	0	CT	0	1	0	0	31	25	0	31	41	0	52	0	0	34	0	5	0	53	0	0	0	25	6	0	0	16	1	4	15	27	6	21	18	0
1713	30-Dec-21	12:40:00	1	0	1	0	CT	0	1	0	0	11	44	44	33	15	0	0	2	0	0	0	22	0	35	0	0	0	23	31	0	0	26	1	16	14	14	7	4	17	0
1714	30-Dec-21	12:45:00	1	0	1	0	CT	0	1	0	0	13	56	24	31	6	0	0	8	0	0	6	20	0	25	0	0	0	17	21	0	0	0	14	35	8	9	0	0	10	0
1715	30-Dec-21	12:50:00	1	0	1	0	CT	0	1	0	0	24	4	0	29	16	6	0	20	0	0	45	20	0	0	0	0	58	23	34	0	0	0	0	16	0	1	0	0	0	0
1716	30-Dec-21	12:55:00	1	0	1	0	CT	0	1	0	0	35	14	0	32	25	48	0	15	0	0	31	10	0	0	0	3	7	28	13	0	0	1	0	17	0	20	0	0	0	0
1717	30-Dec-21	13:00:00	1	0	1	0	CT	0	1	0	0	27	11	0	6	23	39	0	26	0	2	0	25	0	6	0	4	5	32	5	0	0	0	0	5	0	2	0	0	0	0
1718	30-Dec-21	13:05:00	1	0	1	0	CT	0	1	0	0	46	3	0	4	9	32	0	45	0	38	11	39	1	2	0	57	0	35	14	0	0	0	1	0	0	3	0	0	0	0
1719	30-Dec-21	13:10:00	1	0	1	0	CT	0	1	0	0	3	20	0	0	17	0	0	26	0	0	30	13	0	2	0	61	0	2	4	0	0	12	1	0	0	0	0	27	3	0
1720	30-Dec-21	13:15:00	1	0	1	0	CT	0	1	12	0	0	16	0	8	4	0	27	42	28	0	0	7	4	4	0	49	0	3	19	0	0	60	3	0	0	0	0	37	16	0
1721	30-Dec-21	13:20:00	1	0	1	0	CT	0	1	41	0	4	12	0	25	0	0	53	0	71	0	0	13	10	0	0	11	0	0	47	0	0	19	20	0	0	0	0	29	7	0
1722	30-Dec-21	13:25:00	1	0	1	0	CT	0	1	1	0	1	0	0	48	0	0	0	0	40	0	0	21	28	0	0	0	0	0	56	0	0	48	0	5	0	0	58	8	34	0
1723	30-Dec-21	13:30:00	1	0	1	0	CT	0	1	0	0	8	1	0	22	0	0	1	14	10	0	0	16	10	0	0	0	15	0	45	0	0	50	0	0	0	0	84	20	43	0
1724	30-Dec-21	13:35:00	1	0	1	0	CT	0	1	1	0	63	3	0	27	0	0	0	8	0	8	0	11	0	40	0	2	33	0	7	0	0	0	0	0	0	7	54	32	27	0
1725	30-Dec-21	13:40:00	1	0	1	0	CT	0	1	17	0	68	3	10	23	0	0	0	0	0	23	0	15	0	41	0	5	9	0	4	47	0	1	0	6	0	0	19	53	22	0
1726	30-Dec-21	13:45:00	1	0	1	0	CT	0	1	0	0	23	0	21	35	0	0	0	0	0	1	0	25	0	62	0	8	26	0	0	26	0	0	0	54	0	11	0	10	30	0
1727	30-Dec-21	13:50:00	1	0	1	0	CT	0	1	0	0	34	0	86	20	0	0	0	0	0	0	0	8	0	83	0	0	34	0	0	28	0	0	0	17	0	47	1	3	23	0
1728	30-Dec-21	13:55:00	1	0	1	0	CT	0	1	2	0	45	0	77	25	0	22	0	0	0	0	4	11	0	23	0	0	43	4	26	32	0	0	0	0	0	47	9	8	17	0
1729	30-Dec-21	14:00:00	1	0	1	0	CT	0	1	8	0	16	0	24	17	0	26	0	0	0	0	0	11	0	31	0	4	45	7	17	13	0	0	0	12	0	36	0	0	2	0
1730	30-Dec-21	14:05:00	1	0	1	0	CT	0	1	0	0	24	0	0	1	0	52	0	0	0	0	17	9	0	29	0	5	23	15	9	0	0	0	0	10	0	6	5	0	46	13
1731	30-Dec-21	14:10:00	1	0	1	0	CT	0	1	0	0	27	0	0	0	40	63	0	0	0	6	47	4	0	26	0	52	3	32	12	0	0	2	0	19	0	4	12	29	30	19
1732	30-Dec-21	14:15:00	1	0	1	0	CT	0	1	0	0	57	0	0	0	26	10	0	0	0	67	3	12	0	20	0	45	0	29	21	0	0	0	3	28	11	1	0	43	19	16
1733	30-Dec-21	14:20:00	1	0	1	0	CT	0	1	0	0	53	4	0	0	45	0	28	0	0	71	31	23	0	0	0	22	0	8	34	0	0	0	0	52	58	11	0	29	43	26
1734	30-Dec-21	14:25:00	1	0	1	0	CT	0	1	0	0	6	7	0	5	51	0	50	0	0	10	20	12	0	0	0	72	0	31	34	1	0	0	0	34	88	15	0	5	25	0
1735	30-Dec-21	14:30:00	1	0	1	0	CT	0	1	0	29	2	32	0	0	34	0	48	4	0	13	0	16	0	11	0	20	0	8	22	2	0	3	0	6	54	10	0	0	1	0
1736	30-Dec-21	14:35:00	1	0	1	0	CT	0	1	0	57	1	12	0	19	24	0	27	10	6	12	0	10	0	16	0	26	0	18	29	0	0	0	0	0	62	10	0	0	27	5
1737	30-Dec-21	14:40:00	1	0	1	0	CT	0	1	0	22	2	0	0	9	9	0	3	0	0	0	0	22	0	31	0	46	0	50	15	0	0	5	0	0	27	52	6	0	29	11
1738	30-Dec-21	14:45:00	1	0	1	0	CT	0	1	0	20	0	0	0	33	27	4	0	0	0	0	0	15	0	58	0	2	1	30	4	0	0	0	0	8	34	5	0	0	3	14
1739	30-Dec-21	14:50:00	1	0	1	0	CT	0	1	0	0	0	0	0	34	16	22	1	1	9	1	0	0	0	41	0	9	12	3	11	0	0	0	0	0	0	58	0	0	0	0
1740	30-Dec-21	14:55:00	1	0	1	0	CT	0	1	0	0	20	15	0	12	11	46	0	6	5	0	0	11	0	59	0	0	38	55	6	0	0	0	12	0	38	33	0	0	7	0
1741	30-Dec-21	15:00:00	1	0	1	0	CT	0	1	0	0	21	6	56	49	5	28	55	1	10	29	53	14	0	17	0	0	71	47	0	40	0	0	0	0	39	29	0	0	58	0
1742	30-Dec-21	15:05:00	1	0	1	0	CT	0	1	0	0	70	0	0	21	12	40	0	8	18	3	0	9	2	10	0	47	48	31	0	6	0	33	0	0	35	13	0	0	16	0
1743	30-Dec-21	15:10:00	1	0	1	0	CT	0	1	0	0	9	0	0	0	13	21	0	30	5	0	13	11	5	10	0	52	12	0	3	19	0	31	0	1	30	6	58	0	19	0
1744	30-Dec-21	15:15:00	1	0	1	0	CT	0	1	0	0	4	0	0	10	5	0	0	24	0	0	72	15	15	42	0	21	0	0	5	14	0	29	1	6	39	17	68	0	12	0
1745	30-Dec-21	15:20:00	1	0	1	0	CT	0	1	0	0	23	9	0	26	0	0	0	12	0	0	24	5	80	40	0	75	0	0	14	4	0	49	12	4	12	31	58	0	16	0
1746	30-Dec-21	15:25:00	1	0	1	0	CT	0	1	0	0	3	4	0	23	0	0	0	5	0	0	2	10	48	54	0	11	0	1	26	0	0	64	10	0	26	38	0	0	27	0
1747	30-Dec-21	15:30:00	1	0	1	0	CT	0	1	0	0	1	2	0	25	0	0	0	0	0	0	2	19	22	37	0	58	0	0	80	2	0	0	16	0	28	12	0	0	0	0
1748	30-Dec-21	15:35:00	1	0	1	0	CT	0	1	0	0	0	0	0	27	0	0	0	0	0	1	0	7	1	5	0	28	0	5	55	2	0	0	1	63	27	2	2	0	0	10
1749	30-Dec-21	15:40:00	1	0	1	0	CT	0	1	0	0	3	4	0	26	0	0	0	0	0	2	0	12	3	3	0	1	0	0	13	0	0	0	74	14	20	12	12	0	0	27
1750	30-Dec-21	15:45:00	1	0	1	0	CT	0	1	0	0	0	5	0	15	0	0	0	3	0	0	0	20	6	10	0	63	0	0	9	1	0	0	85	16	27	2	18	0	0	0
1751	30-Dec-21	15:50:00	1	0	1	0	CT	0	1	0	0	0	22	0	15	0	0	20	25	0	11	0	13	1	52	0	11	50	2	0	0	0	0	92	31	7	23	73	13	0	0
1752	30-Dec-21	15:55:00	1	0	1	0	CT	0	1	0	0	0	25	0	0	0	0	14	22	0	0	1	12	1	55	0	10	37	2	34	0	0	0	37	33	15	9	55	39	0	0
1753	30-Dec-21	16:00:00	1	0	1	0	CT	0	1	0	0	18	28	0	4	0	0	1	37	0	0	1	14	0	2	0	0	41	0	16	10	0	0	64	9	8	4	10	49	0	0
1754	30-Dec-21	16:05:00	1	0	1	0	CT	0	1	0	1	0	5	22	8	0	0	0	23	0	0	0	8	0	4	0	3	10	0	20	4	0	0	62	26	0	26	0	52	0	0
1755	30-Dec-21	16:10:00	1	0	1	0	CT	0	1	0	0	19	48	31	1	0	0	0	22	0	1	0	0	0	3	0	14	0	49	0	27	0	0	63	25	0	3	0	10	0	0
1756	30-Dec-21	16:15:00	1	0	1	0	CT	0	1	32	0	64	14	90	0	16	0	0	26	0	0	0	27	0	4	0	49	0	47	24	31	0	8	70	26	0	5	0	9	0	0
1757	30-Dec-21	16:20:00	1	0	1	0	CT	0	1	67	0	41	0	45	6	5	14	0	43	0	0	0	8	0	0	0	42	0	43	32	41	0	8	57	38	0	28	0	23	4	2
1758	30-Dec-21	16:25:00	1	0	1	0	CT	0	1	15	0	78	29	9	3	32	40	0	15	43	1	0	11	1	26	0	11	0	26	11	13	0	2	18	24	0	9	0	6	28	1
1759	30-Dec-21	16:30:00	1	0	1	0	CT	0	1	40	0	43	0	0	22	36	53	0	32	57	17	4	15	1	34	0	4	0	4	15	0	0	0	63	0	0	12	0	3	20	6
1760	30-Dec-21	16:35:00	1	0	1	0	CT	0	1	3	0	5	0	0	42	29	33	0	0	28	15	16	10	5	63	0	0	0	10	27	8	0	0	40	0	0	7	35	0	43	59
1761	30-Dec-21	16:40:00	1	0	1	0	CT	0	1	0	0	1	0	0	27	13	0	0	0	38	5	18	26	0	52	0	0	0	7	41	23	0	0	27	0	0	27	77	2	25	4
1762	30-Dec-21	16:45:00	1	0	1	0	CT	0	1	0	0	10	0	0	21	15	0	0	0	8	0	10	7	0	32	0	0	6	0	43	2	0	0	51	4	0	42	55	4	23	0
1763	30-Dec-21	16:50:00	1	0	1	0	CT	0	1	0	0	4	22	0	39	48	0	0	4	2	0	9	0	0	8	0	0	78	0	16	10	0	0	51	5	0	25	13	0	2	1
1764	30-Dec-21	16:55:00	1	0	1	0	CT	0	1	0	0	0	8	0	1	0	0	0	0	0	0	0	0	0	3	0	1	69	0	14	0	0	0	63	3	0	9	8	0	3	0
1765	30-Dec-21	17:00:00	1	0	1	0	CT	0	1	42	18	0	1	1	1	1	0	0	0	0	0	0	4	0	0	0	0	77	0	19	0	0	0	38	2	0	22	28	0	13	0
1766	30-Dec-21	17:05:00	1	0	1	0	CT	0	1	2	45	0	5	0	9	0	0	0	0	0	0	28	3	0	0	0	0	2	0	0	0	0	0	44	0	0	20	0	0	0	0
1767	30-Dec-21	17:10:00	1	0	1	0	CT	0	1	0	13	0	6	0	0	0	2	17	0	0	0	38	1	0	0	0	2	0	0	36	0	0	0	61	0	0	13	0	0	0	1
1768	30-Dec-21	17:15:00	1	0	1	0	CT	0	1	0	45	0	28	0	0	0	0	80	0	0	1	5	8	0	0	0	0	0	0	20	0	0	0	76	9	0	26	0	0	0	0
1769	30-Dec-21	17:20:00	1	0	1	0	CT	0	1	3	38	0	0	0	1	0	36	17	0	0	3	0	0	0	0	0	10	0	0	2	0	0	0	29	1	0	10	0	0	0	10
1770	30-Dec-21	17:25:00	1	0	1	0	CT	0	1	49	0	7	36	0	3	0	53	58	0	0	0	0	0	0	22	0	60	0	0	3	0	0	0	24	24	0	11	0	0	0	22
1771	30-Dec-21	17:30:00	1	0	1	0	CT	0	1	0	0	0	20	0	16	0	16	45	0	4	0	0	0	33	9	0	52	0	0	8	0	0	4	5	28	6	14	0	0	0	6
1772	30-Dec-21	17:35:00	1	0	1	0	CT	0	1	2	0	0	10	0	40	0	0	8	0	2	12	0	0	25	54	0	86	1	0	20	0	0	1	0	18	0	36	34	23	0	0
1773	30-Dec-21	17:40:00	1	0	1	0	CT	0	1	0	0	7	1	0	29	0	0	5	0	0	74	0	0	21	48	0	31	10	0	60	0	0	0	0	36	0	11	79	73	0	0
1774	30-Dec-21	17:45:00	1	0	1	0	CT	0	1	0	0	46	0	26	15	1	0	0	4	0	67	3	0	5	33	0	7	68	0	56	0	0	0	0	27	0	1	74	47	0	15
1775	30-Dec-21	17:50:00	1	0	1	0	CT	0	1	0	0	44	0	8	43	52	0	0	4	0	41	0	0	0	19	0	0	46	0	24	0	0	0	1	10	0	0	40	6	0	13
1776	30-Dec-21	17:55:00	1	0	1	0	CT	0	1	0	0	52	0	6	17	28	0	0	3	0	1	0	1	0	0	0	5	26	0	23	0	0	0	1	2	0	0	0	62	0	0
1777	30-Dec-21	18:00:00	1	0	1	0	CT	0	1	0	0	0	27	0	19	35	0	0	12	0	0	1	17	2	0	0	0	0	0	24	0	0	0	18	0	0	0	42	84	0	0
1778	30-Dec-21	18:05:00	1	0	1	0	CT	0	1	0	0	0	1	0	0	10	0	1	42	0	0	0	56	17	0	0	0	0	0	20	38	0	0	73	3	0	0	0	32	0	0
1779	30-Dec-21	18:10:00	1	0	1	0	CT	0	1	11	5	10	13	0	3	4	14	0	1	0	0	0	28	0	1	0	0	0	2	24	4	0	0	56	2	0	0	3	0	0	0
1780	30-Dec-21	18:15:00	1	0	1	0	CT	0	1	34	0	11	0	0	0	0	74	0	20	5	0	9	31	2	0	0	0	0	16	15	5	0	3	25	1	0	19	0	6	0	0
1781	30-Dec-21	18:20:00	1	0	1	0	CT	0	1	21	0	0	0	1	0	0	6	0	28	0	28	44	14	0	0	0	9	0	0	13	40	0	1	9	0	0	29	0	0	23	0
1782	30-Dec-21	18:25:00	1	0	1	0	CT	0	1	0	0	0	2	0	0	0	0	0	23	1	47	12	10	0	1	0	65	0	3	4	42	0	0	3	2	0	17	0	0	12	0
1783	30-Dec-21	18:30:00	1	0	1	0	CT	0	1	0	0	4	9	0	0	0	0	0	4	0	24	0	60	0	6	0	14	0	0	0	49	0	1	1	40	0	15	15	0	20	0
1784	30-Dec-21	18:35:00	1	0	1	0	CT	0	1	0	0	1	5	1	0	0	41	0	24	15	49	0	17	0	6	0	44	7	23	14	1	0	9	2	29	0	28	77	0	4	20
1785	30-Dec-21	18:40:00	1	0	1	0	CT	0	1	0	0	0	1	2	0	0	16	0	9	16	87	0	18	12	11	0	27	49	57	29	13	0	29	11	15	0	35	50	0	12	4
1786	30-Dec-21	18:45:00	1	0	1	0	CT	0	1	0	0	2	0	75	0	0	0	0	8	22	27	0	23	20	1	0	12	47	43	15	0	0	48	97	19	21	0	0	0	0	0
1787	30-Dec-21	18:50:00	1	0	1	0	CT	0	1	0	0	3	0	14	0	1	28	9	23	0	0	0	18	40	58	0	34	41	0	10	17	0	0	111	5	23	9	46	0	19	57
1788	30-Dec-21	18:55:00	1	0	1	0	CT	0	1	0	16	3	0	0	0	0	69	0	12	0	0	0	20	6	52	0	37	72	0	2	44	0	0	57	6	51	33	56	41	16	0
1789	30-Dec-21	19:00:00	1	0	1	0	CT	0	1	0	69	45	0	0	0	5	23	4	1	0	0	0	4	20	46	0	24	20	0	30	61	0	0	63	2	49	2	0	22	0	0
1790	30-Dec-21	19:05:00	1	0	1	0	CT	0	1	0	0	73	5	0	2	19	22	0	5	0	0	0	1	7	6	0	3	2	0	44	31	0	0	23	13	67	8	0	60	1	0
1791	30-Dec-21	19:10:00	1	0	1	0	CT	0	1	0	0	39	0	0	29	36	0	0	0	0	0	0	0	70	9	0	0	0	0	27	0	0	0	41	5	14	9	22	10	5	0
1792	30-Dec-21	19:15:00	1	0	1	0	CT	0	1	0	0	40	2	0	18	13	0	0	0	8	1	0	0	30	10	0	0	0	0	22	17	0	0	58	8	0	18	0	33	0	0
1793	30-Dec-21	19:20:00	1	0	1	0	CT	0	1	0	0	57	26	0	32	52	0	59	0	0	0	0	0	21	4	0	16	0	0	22	0	0	0	79	21	0	15	0	2	6	0
1794	30-Dec-21	19:25:00	1	0	1	0	CT	0	1	34	0	76	22	0	47	7	28	5	0	0	43	0	0	0	7	0	3	0	0	16	0	0	0	57	15	0	3	0	0	27	0
1795	30-Dec-21	19:30:00	1	0	1	0	CT	0	1	0	37	22	0	0	38	0	0	14	0	0	86	29	0	12	31	0	37	0	0	19	0	0	0	53	22	0	0	0	0	0	0
1796	30-Dec-21	19:35:00	1	0	1	0	CT	0	1	0	0	7	0	23	6	0	0	0	1	0	1	25	0	0	6	0	25	26	0	8	0	0	0	66	42	0	14	45	0	0	0
1797	30-Dec-21	19:40:00	1	0	1	0	CT	0	1	0	0	27	0	22	9	0	21	2	0	0	0	0	0	0	11	0	16	42	0	18	0	0	0	0	18	0	0	32	0	0	0
1798	30-Dec-21	19:45:00	1	0	1	0	CT	0	1	0	0	15	22	70	29	0	36	0	3	0	0	0	4	16	20	0	0	49	0	23	0	0	10	0	1	0	10	6	10	0	0
1799	30-Dec-21	19:50:00	1	0	1	0	CT	0	1	12	0	43	63	7	28	0	22	0	3	0	2	0	57	31	85	0	1	34	0	46	0	0	58	0	6	0	25	27	3	0	72
1800	30-Dec-21	19:55:00	1	0	1	0	CT	0	1	0	0	0	0	21	14	0	1	0	0	2	39	0	22	63	29	0	13	51	0	28	0	0	1	0	4	0	43	37	10	21	6
1801	30-Dec-21	20:00:00	1	0	1	0	CT	0	1	33	0	0	0	12	3	0	10	0	8	6	0	0	13	58	1	0	50	18	3	12	0	0	1	0	3	0	24	57	69	23	0
1802	30-Dec-21	20:05:00	1	0	1	0	CT	0	1	31	0	0	0	62	0	0	24	1	8	7	0	0	4	28	0	0	9	0	26	4	0	0	6	0	11	1	6	59	4	4	0
1803	30-Dec-21	20:10:00	1	0	1	0	CT	0	0	70	81	2	33	29	0	0	9	14	35	5	28	0	0	3	12	0	17	0	4	0	0	0	0	0	0	15	0	87	0	4	42
1804	30-Dec-21	20:15:00	1	0	1	0	CT	0	0	22	85	0	39	84	0	0	51	72	5	0	65	0	0	63	9	0	5	0	0	0	0	0	8	0	0	0	0	79	0	0	0
1805	30-Dec-21	20:20:00	1	0	1	0	CT	0	0	42	37	18	15	29	0	14	7	40	0	0	26	30	0	25	0	0	3	3	1	0	22	0	4	0	0	0	0	15	0	8	23
1806	30-Dec-21	20:25:00	1	0	1	0	CT	0	0	0	28	57	40	12	0	32	62	59	2	43	51	65	0	18	0	0	62	74	14	0	44	0	0	60	0	38	0	4	0	5	0
1807	30-Dec-21	20:30:00	1	0	1	0	CT	0	0	2	36	32	0	29	0	28	68	0	10	31	14	4	0	29	5	0	29	36	84	0	44	0	0	65	0	46	0	0	0	10	0
1808	30-Dec-21	20:35:00	1	0	1	0	CT	0	0	25	72	69	28	57	0	33	44	78	69	39	33	25	0	8	40	0	25	34	42	4	56	0	41	65	0	38	0	24	0	6	0
1809	30-Dec-21	20:40:00	1	0	1	0	CT	0	0	21	86	9	0	7	0	32	33	34	11	17	32	38	4	34	51	0	0	80	9	63	67	0	16	106	0	42	14	0	0	15	0
1810	30-Dec-21	20:45:00	1	0	1	0	CT	0	0	0	42	4	45	0	0	4	30	0	37	0	20	11	0	42	1	0	26	60	20	0	54	0	0	75	0	58	0	0	51	1	0
1811	30-Dec-21	20:50:00	1	0	1	0	CT	0	0	0	32	1	9	16	0	30	56	0	22	63	48	37	1	27	0	0	58	30	62	55	17	0	45	107	63	25	1	0	0	0	0
1812	30-Dec-21	20:55:00	1	0	1	0	CT	0	0	0	34	7	0	70	0	26	26	23	27	0	53	16	8	62	0	0	10	64	17	66	62	0	41	45	29	29	0	3	0	0	2
1813	30-Dec-21	21:00:00	1	0	1	0	CT	0	0	0	0	55	2	77	0	8	18	60	42	53	32	0	0	37	0	0	57	86	0	63	9	0	7	0	2	47	0	28	0	0	39
1814	30-Dec-21	21:05:00	1	0	1	0	CT	0	0	0	4	18	26	64	34	4	36	0	1	24	0	35	0	44	0	0	34	52	14	56	0	0	37	44	0	68	0	26	0	30	4
1815	30-Dec-21	21:10:00	1	0	1	0	CT	0	0	33	30	30	37	38	76	32	35	38	0	33	74	58	0	85	0	0	10	39	0	76	48	0	20	84	0	0	0	12	33	51	0
1816	30-Dec-21	21:15:00	1	0	1	0	CT	0	0	0	19	21	46	77	63	20	32	56	10	21	40	43	22	17	46	0	35	92	1	14	49	0	0	13	37	53	0	7	32	20	0
1817	30-Dec-21	21:20:00	1	0	1	0	CT	0	0	0	0	56	1	68	8	29	18	59	50	0	22	15	71	0	87	0	32	79	70	18	45	0	0	1	11	33	0	0	34	47	21
1818	30-Dec-21	21:25:00	1	0	1	0	CT	0	0	3	90	37	4	49	29	10	9	26	10	0	6	0	16	0	5	0	3	64	32	15	54	0	0	0	0	54	19	0	34	7	0
1819	30-Dec-21	21:30:00	1	0	1	0	CT	0	0	0	26	43	0	14	3	23	19	0	11	25	13	39	18	78	0	0	0	61	17	35	32	0	0	2	44	47	8	50	52	4	26
1820	30-Dec-21	21:35:00	1	0	1	0	CT	0	0	1	19	33	0	60	79	13	51	48	13	30	45	43	26	53	18	0	29	48	13	9	71	0	15	15	61	93	8	69	0	21	0
1821	30-Dec-21	21:40:00	1	0	1	0	CT	0	0	3	0	54	0	34	12	19	54	66	32	19	20	36	15	63	47	0	0	59	0	34	50	0	30	54	70	63	0	74	0	38	0
1822	30-Dec-21	21:45:00	1	0	1	0	CT	0	0	8	28	73	8	1	34	11	39	56	9	8	23	25	0	34	34	0	1	43	28	22	92	0	76	71	28	46	0	20	0	32	0
1823	30-Dec-21	21:50:00	1	0	1	0	CT	0	0	115	37	23	46	50	72	34	21	53	0	15	10	51	0	77	0	0	13	91	9	0	63	0	6	63	24	33	21	9	8	1	27
1824	30-Dec-21	21:55:00	1	0	1	0	CT	0	0	27	27	35	0	55	28	63	38	16	47	0	21	11	0	55	18	0	65	46	0	10	3	0	17	27	41	34	48	63	0	32	5
1825	30-Dec-21	22:00:00	1	0	1	0	CT	0	0	0	10	58	0	10	9	20	22	39	24	32	33	40	21	65	0	0	31	38	55	55	16	0	25	63	28	71	19	31	0	0	0
1826	30-Dec-21	22:05:00	1	0	1	0	CT	0	0	2	5	76	0	49	30	22	6	76	38	18	12	0	18	61	0	0	32	50	43	13	17	0	7	54	24	23	0	16	0	31	16
1827	30-Dec-21	22:10:00	1	0	1	0	CT	0	0	5	0	12	0	34	35	13	73	58	2	13	21	32	44	52	0	0	38	65	15	17	15	0	7	78	34	49	0	18	0	28	26
1828	30-Dec-21	22:15:00	1	0	1	0	CT	0	0	0	36	9	21	20	64	16	50	49	0	1	51	1	36	36	45	0	41	55	44	28	21	0	31	25	33	38	0	0	0	33	0
1829	30-Dec-21	22:20:00	1	0	1	0	CT	0	0	36	8	64	11	21	12	19	40	0	16	27	0	46	0	40	45	0	24	55	4	32	52	0	3	0	23	30	4	0	0	6	0
1830	30-Dec-21	22:25:00	1	0	1	0	CT	0	0	31	52	45	18	24	13	13	53	0	48	21	38	69	17	67	14	0	63	56	12	29	29	0	0	42	49	66	9	0	0	7	0
1831	30-Dec-21	22:30:00	1	0	1	0	CT	0	0	13	0	0	54	61	28	10	32	30	27	0	13	33	43	63	0	0	73	52	42	8	42	0	0	76	72	34	28	0	14	0	10
1832	30-Dec-21	22:35:00	1	0	1	0	CT	0	0	2	14	0	90	41	69	22	10	62	21	20	1	48	33	40	21	0	11	49	29	4	72	0	26	32	2	29	38	37	45	3	10
1833	30-Dec-21	22:40:00	1	0	1	0	CT	0	0	1	0	42	33	41	57	19	0	1	23	34	40	38	43	39	63	0	32	48	35	34	70	0	39	93	29	46	12	63	32	23	17
1834	30-Dec-21	22:45:00	1	0	1	0	CT	0	0	2	0	59	0	0	35	15	38	51	2	39	28	42	23	63	74	0	62	62	15	35	40	0	0	54	15	38	2	79	0	32	13
1835	30-Dec-21	22:50:00	1	0	1	0	CT	0	0	0	47	41	0	21	61	30	24	0	19	27	13	27	26	39	46	0	58	62	17	18	27	0	0	82	55	25	35	47	0	13	12
1836	30-Dec-21	22:55:00	1	0	1	0	CT	0	0	5	73	40	14	39	16	28	24	0	26	15	9	0	16	52	2	0	44	64	44	21	12	0	43	47	43	41	0	0	0	0	2
1837	30-Dec-21	23:00:00	1	0	1	0	CT	0	0	38	0	24	19	29	46	74	81	0	26	27	23	34	16	78	0	0	69	55	64	40	66	0	51	63	41	29	31	0	0	0	3
1838	30-Dec-21	23:05:00	1	0	1	0	CT	0	0	0	0	17	17	79	10	25	40	0	63	42	19	11	17	38	80	0	52	104	38	53	44	0	0	22	3	51	30	18	0	0	0
1839	30-Dec-21	23:10:00	1	0	1	0	CT	0	0	0	16	65	0	12	46	19	31	0	13	31	21	0	0	58	16	0	0	80	46	11	1	0	58	37	24	38	20	48	0	37	0
1840	30-Dec-21	23:15:00	1	0	1	0	CT	0	0	3	35	49	32	50	18	32	16	6	12	30	17	34	0	33	60	0	30	61	42	6	22	0	32	0	35	42	5	54	0	20	0
1841	30-Dec-21	23:20:00	1	0	1	0	CT	0	0	86	0	31	15	68	37	25	32	12	19	28	48	49	0	5	34	0	67	63	11	0	63	0	27	0	38	21	12	42	0	0	7
1842	30-Dec-21	23:25:00	1	0	1	0	CT	0	0	24	0	66	0	42	63	34	36	96	18	18	28	0	0	7	30	0	24	51	26	27	65	0	40	51	51	31	32	0	0	16	47
1843	30-Dec-21	23:30:00	1	0	1	0	CT	0	0	3	3	57	0	43	47	33	14	49	18	10	38	6	0	2	24	0	28	55	72	2	67	0	6	3	28	37	27	0	0	23	0
1844	30-Dec-21	23:35:00	1	0	1	0	CT	0	0	0	15	47	0	39	53	55	28	2	0	36	1	56	1	5	20	0	1	58	5	1	12	0	0	27	11	39	39	0	32	10	0
1845	30-Dec-21	23:40:00	1	0	1	0	CT	0	0	4	23	54	0	42	33	30	0	0	32	0	56	58	0	5	1	0	59	60	22	56	62	0	41	9	24	29	61	3	16	21	0
1846	30-Dec-21	23:45:00	1	0	1	0	CT	0	0	0	0	10	0	69	4	42	49	0	0	0	24	29	0	11	0	0	38	43	10	42	63	0	41	3	1	26	40	37	0	22	0
1847	30-Dec-21	23:50:00	1	0	1	0	CT	0	0	0	19	65	0	51	5	22	24	2	2	0	13	23	0	0	37	0	7	61	25	12	46	0	18	8	3	0	0	96	0	39	0
1848	30-Dec-21	23:55:00	1	0	1	0	CT	0	0	0	48	39	0	59	0	45	39	35	0	0	0	33	0	6	17	0	40	56	18	32	17	0	32	77	47	29	10	81	0	0	3
1849	31-Dec-21	0:00:00	1	0	1	0	CT	0	0	0	0	7	1	51	0	38	56	7	0	0	0	77	0	1	35	0	0	20	0	5	0	0	46	41	0	48	30	77	0	57	0
1850	31-Dec-21	0:05:00	1	0	1	0	CT	0	0	0	0	73	4	80	0	22	37	0	0	0	0	110	0	3	10	0	1	87	0	0	0	0	31	0	0	36	0	50	0	31	0
1851	31-Dec-21	0:10:00	1	0	1	0	CT	0	0	0	0	73	15	1	49	20	83	0	0	0	29	71	2	39	56	0	0	82	0	5	0	0	32	0	0	45	0	28	0	10	1
1852	31-Dec-21	0:15:00	1	0	1	0	CT	0	0	0	0	41	0	58	0	23	31	0	0	0	9	57	2	23	0	0	0	58	0	77	10	0	89	22	0	0	0	58	0	27	8
1853	31-Dec-21	0:20:00	1	0	1	0	CT	0	0	21	0	36	0	45	0	28	56	0	26	0	16	39	0	20	3	0	2	109	0	23	63	0	23	62	0	0	14	21	0	30	0
1854	31-Dec-21	0:25:00	1	0	1	0	CT	0	0	1	0	33	0	69	1	22	45	0	0	0	26	73	0	0	4	0	15	68	0	0	2	0	37	1	0	0	0	15	0	1	0
1855	31-Dec-21	0:30:00	1	0	1	0	CT	0	0	1	0	0	0	70	0	9	3	0	0	0	0	53	0	0	0	0	32	74	0	0	15	0	81	2	0	0	0	23	0	0	43
1856	31-Dec-21	0:35:00	1	0	1	0	CT	0	0	0	0	48	5	41	8	17	0	0	0	7	0	55	2	0	0	0	40	56	0	0	63	0	40	1	0	0	0	0	0	0	0
1857	31-Dec-21	0:40:00	1	0	1	0	CT	0	0	0	0	60	3	45	35	37	0	0	0	0	0	16	6	0	0	0	0	63	0	0	2	0	27	6	0	33	0	0	0	2	0
1858	31-Dec-21	0:45:00	1	0	1	0	CT	0	0	0	0	5	1	79	0	34	0	2	0	6	0	74	63	0	0	0	0	75	0	0	27	0	34	24	0	4	0	0	0	69	3
1859	31-Dec-21	0:50:00	1	0	1	0	CT	0	0	0	0	82	0	50	0	25	0	0	0	0	0	25	0	0	0	0	0	63	0	25	32	0	18	28	0	0	0	0	0	8	4
1860	31-Dec-21	0:55:00	1	0	1	0	CT	0	0	0	0	21	0	33	0	15	0	6	0	0	0	20	0	28	0	0	1	48	0	0	15	0	62	0	0	0	0	0	0	0	9
1861	31-Dec-21	1:00:00	1	0	1	0	CT	0	0	0	0	36	0	63	0	4	0	13	1	0	7	108	0	10	0	0	0	69	0	12	18	0	78	0	0	0	0	0	0	0	22
1862	31-Dec-21	1:05:00	1	0	1	0	CT	0	0	3	0	61	0	50	0	0	0	16	0	0	20	56	0	11	0	0	1	50	0	0	12	0	39	0	0	0	0	15	0	0	3
1863	31-Dec-21	1:10:00	1	0	1	0	CT	0	0	1	0	59	5	70	0	0	6	1	7	0	55	43	0	13	0	0	16	68	0	0	44	0	21	0	0	0	0	2	0	0	0
1864	31-Dec-21	1:15:00	1	0	1	0	CT	0	0	4	0	62	12	28	1	2	38	0	0	0	63	63	0	5	0	0	2	90	0	0	47	0	37	1	0	0	0	0	0	0	0
1865	31-Dec-21	1:20:00	1	0	1	0	CT	0	0	11	0	68	0	0	0	0	0	0	0	0	3	37	14	2	0	0	0	68	0	1	0	0	39	0	0	0	0	0	0	0	0
1866	31-Dec-21	1:25:00	1	0	1	0	CT	0	0	12	0	71	0	67	0	14	0	0	9	0	3	48	18	1	0	0	0	76	8	0	8	0	23	0	0	0	0	32	0	0	0
1867	31-Dec-21	1:30:00	1	0	1	0	CT	0	0	7	0	61	0	60	0	18	0	7	18	0	0	57	5	2	0	0	0	74	49	1	0	0	0	0	0	0	0	92	0	10	0
1868	31-Dec-21	1:35:00	1	0	1	0	CT	0	0	3	0	7	0	0	0	0	0	0	45	0	0	56	0	2	0	0	0	82	0	0	0	0	60	0	0	3	9	68	0	19	0
1869	31-Dec-21	1:40:00	1	0	1	0	CT	0	0	52	0	54	0	49	0	0	1	0	4	0	0	53	0	0	0	0	0	46	0	0	0	0	39	0	0	1	0	17	0	0	0
1870	31-Dec-21	1:45:00	1	0	1	0	CT	0	0	0	0	8	35	6	0	0	27	0	3	1	57	47	0	0	0	0	0	49	0	0	9	0	0	0	0	0	0	5	0	0	0
1871	31-Dec-21	1:50:00	1	0	1	0	CT	0	0	0	0	77	0	2	0	0	5	1	0	0	37	43	0	0	0	0	0	37	0	0	0	0	0	0	0	1	0	50	0	0	0
1872	31-Dec-21	1:55:00	1	0	1	0	CT	0	0	0	0	83	1	2	0	0	0	0	0	0	3	3	0	0	0	0	7	90	0	0	0	0	0	0	10	0	0	71	0	11	0
1873	31-Dec-21	2:00:00	1	0	1	0	CT	0	0	0	11	38	0	2	0	0	0	1	4	14	1	0	0	0	0	0	53	43	0	0	0	0	0	0	0	0	0	45	0	6	6
1874	31-Dec-21	2:05:00	1	0	1	0	CT	0	0	0	0	10	0	2	0	0	0	0	6	5	0	0	0	0	0	0	38	3	0	0	0	0	0	0	3	0	0	45	0	0	0
1875	31-Dec-21	2:10:00	1	0	1	0	CT	0	0	0	0	0	0	0	0	0	0	1	0	0	3	0	0	0	2	0	7	52	0	63	0	0	4	0	20	1	0	0	0	0	0
1876	31-Dec-21	2:15:00	1	0	1	0	CT	0	0	0	0	2	24	0	0	2	0	11	0	0	0	0	0	0	3	0	0	50	0	1	0	0	35	0	0	0	0	0	0	0	0
1877	31-Dec-21	2:20:00	1	0	1	0	CT	0	0	0	0	0	0	0	0	0	0	0	18	0	0	0	0	1	38	0	0	62	0	1	0	0	31	0	0	0	1	0	0	0	0
1878	31-Dec-21	2:25:00	1	0	1	0	CT	0	0	0	0	0	7	6	0	1	17	4	0	0	2	0	0	18	5	0	0	0	0	0	32	0	0	2	1	2	15	0	0	0	0
1879	31-Dec-21	2:30:00	1	0	1	0	CT	0	0	0	0	0	7	1	0	0	0	58	4	0	1	0	0	21	0	0	0	0	0	1	57	0	1	60	0	0	13	16	0	16	0
1880	31-Dec-21	2:35:00	1	0	1	0	CT	0	0	0	0	1	0	41	0	0	20	0	7	0	1	0	0	13	0	0	0	0	0	0	32	0	1	0	0	17	65	0	0	23	0
1881	31-Dec-21	2:40:00	1	0	1	0	CT	0	0	0	0	1	0	1	0	0	0	1	0	0	0	0	0	0	0	0	0	0	0	0	45	0	0	0	0	30	0	0	0	0	0
1882	31-Dec-21	2:45:00	1	0	1	0	CT	0	0	0	0	0	0	0	0	0	0	0	0	0	8	0	0	0	0	0	17	0	0	0	65	0	0	0	0	49	0	3	0	0	8
1883	31-Dec-21	2:50:00	1	0	1	0	CT	0	0	0	0	0	0	1	0	0	0	0	0	0	66	0	0	0	0	0	25	0	2	0	41	0	0	0	1	16	0	30	0	0	1
1884	31-Dec-21	2:55:00	1	0	1	0	CT	0	0	0	0	0	0	8	0	0	0	0	1	0	32	0	0	0	0	0	39	0	0	0	66	0	0	0	0	85	0	15	4	0	0
1885	31-Dec-21	3:00:00	1	0	1	0	CT	0	0	5	0	0	0	31	44	24	0	52	0	0	41	0	0	0	0	0	7	5	10	0	0	0	3	0	0	37	0	7	18	0	0
1886	31-Dec-21	3:05:00	1	0	1	0	CT	0	0	1	0	0	0	0	33	1	0	4	1	0	0	0	0	0	5	0	1	2	25	0	0	0	0	0	0	44	0	0	83	0	1
1887	31-Dec-21	3:10:00	1	0	1	0	CT	0	0	0	0	0	21	1	3	1	0	0	1	4	8	0	0	0	0	0	0	14	0	0	0	0	0	6	0	0	0	0	21	0	0
1888	31-Dec-21	3:15:00	1	0	1	0	CT	0	0	1	0	0	5	0	56	63	0	0	2	8	0	0	0	0	49	0	0	16	0	0	0	0	1	105	0	0	3	0	55	0	8
1889	31-Dec-21	3:20:00	1	0	1	0	CT	0	0	2	0	0	21	0	20	17	0	0	0	24	0	0	0	0	45	0	0	4	0	0	0	0	36	82	45	0	12	0	62	0	3
1890	31-Dec-21	3:25:00	1	0	1	0	CT	0	0	1	0	0	57	0	41	1	0	0	13	5	0	0	0	11	17	0	0	0	0	5	0	0	0	88	47	0	0	0	0	5	0
1891	31-Dec-21	3:30:00	1	0	1	0	CT	0	0	0	0	11	7	2	45	0	0	0	0	1	0	0	0	3	0	0	0	0	0	0	0	0	0	68	0	0	0	0	0	0	7
1892	31-Dec-21	3:35:00	1	0	1	0	CT	0	0	1	0	0	8	0	19	0	0	0	0	0	0	0	9	2	0	0	0	30	0	0	0	0	0	30	36	0	0	0	0	0	0
1893	31-Dec-21	3:40:00	1	0	1	0	CT	0	0	2	0	0	16	0	3	8	0	0	0	0	0	0	0	3	0	0	0	19	8	0	0	0	0	0	2	0	0	0	0	0	0
1894	31-Dec-21	3:45:00	1	0	1	0	CT	0	0	51	0	0	0	0	1	73	0	0	0	1	0	0	0	4	15	0	0	44	8	0	0	0	0	8	0	0	15	0	0	0	0
1895	31-Dec-21	3:50:00	1	0	1	0	CT	0	0	43	0	0	0	0	0	12	9	0	0	0	0	0	0	3	58	0	0	71	51	0	0	0	0	32	4	0	0	31	15	0	0
1896	31-Dec-21	3:55:00	1	0	1	0	CT	0	0	44	0	0	0	0	0	55	0	0	0	0	0	0	0	5	54	0	0	87	4	0	0	0	0	69	6	0	0	40	6	4	2
1897	31-Dec-21	4:00:00	1	0	1	0	CT	0	0	15	0	1	0	0	0	74	19	0	1	4	0	0	0	0	61	0	1	81	0	0	0	0	0	4	0	0	0	28	0	3	4
1898	31-Dec-21	4:05:00	1	0	1	0	CT	0	0	0	0	0	1	0	0	21	0	0	1	0	0	0	0	2	1	0	0	49	0	0	14	0	0	1	1	0	0	3	3	1	33
1899	31-Dec-21	4:10:00	1	0	1	0	CT	0	0	0	0	0	0	0	0	71	0	0	0	0	0	0	0	10	0	0	0	18	1	41	0	0	0	1	0	0	0	0	0	7	3
1900	31-Dec-21	4:15:00	1	0	1	0	CT	0	0	0	0	20	0	1	0	41	0	0	1	0	0	2	1	30	3	0	0	10	5	26	27	0	0	1	0	0	0	40	0	14	0
1901	31-Dec-21	4:20:00	1	0	1	0	CT	0	0	0	0	44	0	0	0	17	0	0	5	0	0	0	15	5	0	0	0	0	0	14	51	0	0	0	0	0	0	65	0	46	10
1902	31-Dec-21	4:25:00	1	0	1	0	CT	0	0	8	0	0	0	0	0	22	0	0	5	6	0	0	14	48	0	0	5	4	0	17	32	0	0	0	4	0	0	78	0	1	19
1903	31-Dec-21	4:30:00	1	0	1	0	CT	0	0	5	0	63	0	4	0	25	0	0	0	1	0	0	24	35	0	0	0	2	0	1	29	0	0	0	66	0	0	60	0	0	0
1904	31-Dec-21	4:35:00	1	0	1	0	CT	0	0	0	0	20	0	0	0	17	0	0	0	7	0	0	35	34	0	0	0	0	0	6	1	0	9	3	0	0	7	25	0	0	0
1905	31-Dec-21	4:40:00	1	0	1	0	CT	0	0	0	0	0	0	29	0	7	0	0	11	1	0	0	0	24	0	0	0	0	25	4	0	0	0	71	0	0	0	0	0	0	0
1906	31-Dec-21	4:45:00	1	0	1	0	CT	0	0	0	0	0	17	15	0	0	0	0	0	0	44	0	0	21	0	0	2	0	0	6	0	0	0	77	9	0	0	0	0	0	25
1907	31-Dec-21	4:50:00	1	0	1	0	CT	0	0	0	0	13	38	50	15	0	0	0	0	0	52	0	0	2	0	0	2	0	0	0	0	0	0	45	0	0	0	0	0	0	28
1908	31-Dec-21	4:55:00	1	0	1	0	CT	0	0	0	0	51	0	0	34	0	0	1	0	0	7	0	0	2	0	0	0	2	0	0	0	0	0	66	8	0	0	0	0	0	12
1909	31-Dec-21	5:00:00	1	0	1	0	CT	0	0	0	0	63	30	11	7	0	0	28	0	0	0	0	0	1	30	0	27	2	0	0	0	0	6	25	63	0	0	15	0	0	1
1910	31-Dec-21	5:05:00	1	0	1	0	CT	0	0	0	0	69	15	0	38	0	0	11	0	0	31	0	0	0	62	0	65	1	0	10	11	0	15	13	1	0	0	0	0	0	15
1911	31-Dec-21	5:10:00	1	0	1	0	CT	0	0	0	0	49	23	0	55	0	0	0	0	0	16	0	0	0	20	0	56	0	0	29	0	0	0	38	0	0	0	21	0	0	20
1912	31-Dec-21	5:15:00	1	0	1	0	CT	0	0	0	0	41	0	0	12	0	0	0	0	0	0	10	0	0	0	0	3	11	0	1	0	0	29	0	0	0	0	78	1	0	4
1913	31-Dec-21	5:20:00	1	0	1	0	CT	0	0	0	0	93	0	1	25	0	8	1	0	0	1	11	0	0	0	0	46	2	0	11	0	0	0	66	0	2	0	69	0	2	3
1914	31-Dec-21	5:25:00	1	0	1	0	CT	0	0	6	0	39	0	0	43	0	13	0	0	0	0	10	0	0	0	0	33	5	0	0	0	0	0	61	5	1	7	2	0	0	0
1915	31-Dec-21	5:30:00	1	0	1	0	CT	0	0	0	0	0	1	10	0	0	0	0	0	0	1	74	0	0	0	0	0	0	11	0	16	0	0	54	0	1	0	7	0	13	0
1916	31-Dec-21	5:35:00	1	0	1	0	CT	0	0	0	0	0	23	48	0	0	0	2	18	4	1	65	0	1	0	0	0	0	0	0	20	0	0	17	0	13	0	0	1	8	1
1917	31-Dec-21	5:40:00	1	0	1	0	CT	0	0	0	0	0	33	29	0	0	22	46	1	0	0	21	0	12	0	0	0	2	14	1	0	0	0	0	0	0	0	0	0	10	29
1918	31-Dec-21	5:45:00	1	0	1	0	CT	0	0	0	0	0	2	22	0	0	30	47	40	0	0	47	0	34	0	0	0	6	17	31	0	0	0	0	6	0	2	21	1	10	0
1919	31-Dec-21	5:50:00	1	0	1	0	CT	0	0	4	0	0	0	38	0	0	1	4	0	0	0	48	0	28	0	0	0	0	63	8	0	0	0	0	39	0	0	9	30	2	0
1920	31-Dec-21	5:55:00	1	0	1	0	CT	0	0	0	0	0	0	62	0	0	0	4	0	0	0	79	0	47	0	0	0	0	28	36	0	0	0	8	29	0	0	0	3	0	0
1921	31-Dec-21	6:00:00	1	0	1	0	CT	0	0	5	0	0	0	20	0	0	0	0	0	0	0	49	0	42	0	0	0	0	4	104	22	0	0	32	0	12	0	0	0	0	0
1922	31-Dec-21	6:05:00	1	0	1	0	CT	0	0	23	0	0	0	3	0	0	0	8	0	0	0	30	0	55	55	0	42	0	50	51	48	0	0	42	0	1	0	0	0	0	0
1923	31-Dec-21	6:10:00	1	0	1	0	CT	0	0	21	0	0	0	0	0	0	15	92	0	0	0	50	20	19	46	0	72	0	0	3	50	0	0	43	0	7	0	53	0	8	0
1924	31-Dec-21	6:15:00	1	0	1	0	CT	0	0	60	0	0	0	0	0	0	2	11	0	0	0	51	14	24	0	0	12	9	0	3	8	0	0	33	0	26	9	72	0	24	0
1925	31-Dec-21	6:20:00	1	0	1	0	CT	0	0	33	0	0	0	3	0	0	1	0	10	0	0	29	0	0	0	0	0	73	0	9	65	0	0	63	0	42	26	30	0	0	20
1926	31-Dec-21	6:25:00	1	0	1	0	CT	0	0	9	0	0	0	0	10	0	13	40	12	0	0	21	0	13	0	0	8	32	0	15	95	0	0	0	2	10	0	0	0	0	0
1927	31-Dec-21	6:30:00	1	0	1	0	CT	0	0	0	0	0	0	0	25	0	21	0	12	0	0	36	0	0	0	0	47	71	0	0	17	0	32	11	11	0	0	0	1	0	0
1928	31-Dec-21	6:35:00	1	0	1	0	CT	0	0	0	0	65	0	0	7	0	44	0	1	2	0	17	7	0	0	0	12	74	0	0	63	0	46	0	0	0	53	8	0	0	3
1929	31-Dec-21	6:40:00	1	0	1	0	CT	0	0	0	0	31	0	0	7	0	0	0	4	0	32	0	42	28	0	0	63	95	0	0	72	0	29	30	0	0	16	9	0	0	5
1930	31-Dec-21	6:45:00	1	0	1	0	CT	0	0	0	0	36	0	0	49	0	0	0	0	0	12	0	12	24	20	0	1	51	0	3	6	0	0	54	0	0	0	0	0	0	9
1931	31-Dec-21	6:50:00	1	0	1	0	CT	0	0	0	0	12	6	0	27	0	0	0	0	0	6	0	0	51	19	0	6	48	3	8	5	0	2	38	3	0	8	0	0	4	3
1932	31-Dec-21	6:55:00	1	0	1	0	CT	0	0	0	2	16	39	0	63	0	0	0	0	0	21	0	0	78	29	0	2	22	71	3	0	0	0	21	3	0	0	0	1	0	2
1933	31-Dec-21	7:00:00	1	0	1	0	CT	0	0	10	7	0	61	0	54	0	0	0	0	2	0	0	0	20	0	0	3	1	27	0	20	0	0	15	9	0	0	0	0	2	36
1934	31-Dec-21	7:05:00	1	0	1	0	CT	0	0	8	14	0	17	0	35	0	4	0	0	0	0	0	0	21	0	0	59	0	25	60	71	0	2	26	0	0	0	0	15	27	11
1935	31-Dec-21	7:10:00	1	0	1	0	CT	0	0	0	15	0	21	0	19	0	2	0	0	14	0	0	0	2	2	0	28	1	7	85	14	0	0	31	0	0	0	9	39	15	6
1936	31-Dec-21	7:15:00	1	0	1	0	CT	0	0	0	52	0	3	18	0	0	0	0	0	23	0	0	0	18	0	0	28	0	3	22	0	0	0	47	4	0	0	7	19	5	3
1937	31-Dec-21	7:20:00	1	0	1	0	CT	0	0	0	14	67	2	0	21	0	1	0	0	4	0	0	0	18	0	0	51	0	26	31	0	0	0	0	0	0	0	1	2	0	0
1938	31-Dec-21	7:25:00	1	0	1	0	CT	0	0	0	69	60	30	0	1	0	10	2	0	0	0	0	0	0	0	0	13	0	3	0	0	0	0	0	0	0	0	62	0	1	5
1939	31-Dec-21	7:30:00	1	0	1	0	CT	0	0	0	7	65	24	0	62	0	6	0	0	15	0	0	0	4	0	0	14	2	0	0	0	0	0	13	0	0	0	50	0	7	0
1940	31-Dec-21	7:35:00	1	0	1	0	CT	0	0	0	24	14	42	0	36	0	34	0	0	18	0	0	0	0	10	0	46	0	0	2	0	0	0	17	1	0	0	22	0	37	0
1941	31-Dec-21	7:40:00	1	0	1	0	CT	0	0	7	0	9	40	0	29	21	24	0	24	10	14	0	0	0	71	0	10	0	0	39	0	0	0	0	19	0	0	29	0	0	0
1942	31-Dec-21	7:45:00	1	0	1	0	CT	0	0	3	4	0	0	0	25	15	26	0	19	0	6	50	15	0	13	0	9	0	0	1	0	0	0	0	8	0	4	24	0	1	0
1943	31-Dec-21	7:50:00	1	0	1	0	CT	0	0	0	37	0	0	0	6	27	1	7	10	27	17	32	12	0	8	0	11	0	0	20	0	0	0	2	0	7	0	9	5	0	13
1944	31-Dec-21	7:55:00	1	0	1	0	CT	0	0	0	27	0	1	33	29	0	0	40	28	73	11	56	12	0	16	0	62	0	0	43	0	0	0	4	14	46	0	57	2	1	8
1945	31-Dec-21	8:00:00	1	0	1	0	CT	0	0	35	16	45	3	40	27	0	0	63	39	33	0	33	15	0	0	0	23	0	0	1	0	0	0	15	35	24	0	3	0	0	0
1946	31-Dec-21	8:05:00	1	0	1	0	CT	0	1	2	44	64	24	78	72	61	34	62	27	50	58	80	37	23	59	0	37	12	56	82	16	0	33	14	82	69	38	3	50	28	14
1947	31-Dec-21	8:10:00	1	0	1	0	CT	0	1	0	37	66	71	64	61	71	59	51	75	38	69	87	69	66	48	0	65	47	52	54	65	0	48	76	82	51	61	0	0	41	43
1948	31-Dec-21	8:15:00	1	0	1	0	CT	0	1	0	32	75	62	69	57	83	39	40	40	48	30	89	36	23	31	0	45	90	12	58	31	0	31	92	44	76	30	0	0	41	67
1949	31-Dec-21	8:20:00	1	0	1	0	CT	0	1	0	32	57	58	66	37	28	60	22	75	39	27	68	42	37	75	0	46	38	86	47	12	0	57	76	37	76	23	6	0	39	6
1950	31-Dec-21	8:25:00	1	0	1	0	CT	0	1	0	36	65	16	61	32	27	14	48	57	40	8	61	37	31	48	0	43	47	32	78	0	0	74	40	82	78	17	23	0	0	15
1951	31-Dec-21	8:30:00	1	0	1	0	CT	0	1	0	13	90	45	55	17	32	0	0	19	32	74	43	69	29	25	0	26	54	31	57	0	0	19	11	18	41	18	33	0	13	46
1952	31-Dec-21	8:35:00	1	0	1	0	CT	0	1	0	11	46	17	39	36	29	0	0	43	52	29	92	24	17	17	0	45	62	53	70	0	0	2	0	30	54	30	0	0	1	0
1953	31-Dec-21	8:40:00	1	0	1	0	CT	0	1	0	8	34	25	14	39	65	33	0	14	2	0	78	31	63	17	0	20	61	53	32	0	0	0	0	33	80	24	0	0	20	0
1954	31-Dec-21	8:45:00	1	0	1	0	CT	0	1	0	0	70	0	31	15	63	30	0	14	1	6	52	48	65	34	0	35	36	5	29	0	0	0	0	45	52	41	0	21	40	0
1955	31-Dec-21	8:50:00	1	0	1	0	CT	0	1	0	15	63	13	23	36	67	21	0	40	0	2	43	31	34	14	0	32	37	0	16	0	0	0	0	42	51	32	37	10	10	4
1956	31-Dec-21	8:55:00	1	0	1	0	CT	0	1	3	5	57	30	59	44	41	68	0	19	27	2	69	89	2	1	0	53	42	0	23	0	0	1	3	9	40	28	0	55	15	0
1957	31-Dec-21	9:00:00	1	0	1	0	CT	0	1	29	0	61	0	17	9	25	27	0	6	31	68	34	28	0	0	0	26	39	11	2	0	0	0	19	0	42	13	0	2	24	2
1958	31-Dec-21	9:05:00	1	0	1	0	CT	0	1	0	2	37	17	4	19	10	20	0	21	5	21	23	46	0	0	0	1	26	17	38	1	0	0	39	0	34	23	0	20	16	0
1959	31-Dec-21	9:10:00	1	0	1	0	CT	0	1	0	0	50	35	11	23	3	27	0	11	8	16	66	50	0	3	0	42	34	23	64	1	0	5	2	0	35	33	0	19	43	9
1960	31-Dec-21	9:15:00	1	0	1	0	CT	0	1	0	36	68	22	0	29	0	21	9	8	0	0	54	29	0	0	0	3	20	0	72	5	0	40	0	0	33	17	0	0	11	5
1961	31-Dec-21	9:20:00	1	0	1	0	CT	0	1	0	20	56	4	0	14	0	31	34	5	0	35	38	23	0	15	0	20	0	15	23	0	0	28	0	39	48	22	0	0	6	8
1962	31-Dec-21	9:25:00	1	0	1	0	CT	0	1	2	0	30	36	0	18	2	15	1	31	22	0	42	22	0	31	0	24	0	15	25	0	0	0	0	26	38	45	0	0	0	0
1963	31-Dec-21	9:30:00	1	0	1	0	CT	0	1	0	38	49	39	0	29	0	0	1	63	37	0	37	29	0	24	0	39	0	0	21	3	0	0	0	22	40	50	39	39	19	0
1964	31-Dec-21	9:35:00	1	0	1	0	CT	0	1	66	17	72	20	0	24	0	0	0	0	0	0	33	40	0	36	0	26	63	17	25	7	0	0	0	63	31	13	80	25	0	0
1965	31-Dec-21	9:40:00	1	0	1	0	CT	0	1	4	0	22	17	1	9	0	0	31	0	0	0	27	29	0	49	0	38	0	5	20	63	0	0	0	4	29	17	30	0	6	18
1966	31-Dec-21	9:45:00	1	0	1	0	CT	0	1	0	22	36	4	15	34	8	0	56	0	0	15	37	23	0	7	0	11	15	16	8	10	0	1	63	0	32	35	0	0	37	0
1967	31-Dec-21	9:50:00	1	0	1	0	CT	0	1	0	0	88	29	20	37	15	0	0	0	0	0	50	34	0	10	0	12	32	33	0	41	0	0	100	27	36	23	5	0	11	2
1968	31-Dec-21	9:55:00	1	0	1	0	CT	0	1	0	0	65	3	42	41	57	0	33	26	0	0	46	27	0	0	0	32	39	15	0	37	0	2	61	27	42	39	0	0	37	0
1969	31-Dec-21	10:00:00	1	0	1	0	CT	0	1	5	0	46	0	35	32	37	0	44	43	0	0	48	20	0	0	0	0	27	32	6	27	0	0	88	15	34	52	0	0	14	2
1970	31-Dec-21	10:05:00	1	0	1	0	CT	0	1	79	0	34	6	20	20	27	0	0	27	31	0	48	1	0	0	0	21	0	12	79	11	0	5	14	33	27	35	0	0	29	3
1971	31-Dec-21	10:10:00	1	0	1	0	CT	0	1	67	0	67	16	0	29	8	0	5	19	29	0	48	25	0	0	0	44	0	12	3	13	0	44	0	32	28	11	0	0	12	6
1972	31-Dec-21	10:15:00	1	0	1	0	CT	0	1	0	12	52	6	0	18	6	0	37	18	42	0	45	54	0	19	0	18	0	8	9	31	0	36	0	6	30	14	0	0	41	0
1973	31-Dec-21	10:20:00	1	0	1	0	CT	0	1	0	44	33	9	0	35	54	0	29	22	30	0	53	20	0	48	0	0	0	15	16	42	0	30	0	12	30	20	0	0	16	5
1974	31-Dec-21	10:25:00	1	0	1	0	CT	0	1	0	0	60	22	0	38	32	8	24	16	39	11	47	28	0	38	0	0	0	0	36	0	0	20	0	63	45	29	12	0	34	31
1975	31-Dec-21	10:30:00	1	0	1	0	CT	0	1	0	0	54	15	0	43	17	17	9	6	12	68	20	48	0	34	0	0	0	0	22	0	0	0	11	49	27	33	45	3	21	2
1976	31-Dec-21	10:35:00	1	0	1	0	CT	0	1	0	20	30	0	0	32	31	0	0	5	24	87	26	28	0	35	0	0	10	0	5	0	0	0	38	25	39	24	67	0	7	22
1977	31-Dec-21	10:40:00	1	0	1	0	CT	0	1	0	35	54	23	0	24	46	1	2	3	7	38	50	43	0	11	0	0	36	2	3	0	0	0	39	7	41	27	0	49	34	21
1978	31-Dec-21	10:45:00	1	0	1	0	CT	0	1	0	1	30	19	0	33	15	19	15	24	1	89	51	23	0	29	0	2	28	26	13	0	0	0	13	34	31	16	0	16	29	0
1979	31-Dec-21	10:50:00	1	0	1	0	CT	0	1	0	19	37	3	0	23	65	45	1	33	0	34	48	30	0	24	0	0	13	21	28	7	0	0	45	36	43	13	0	58	4	0
1980	31-Dec-21	10:55:00	1	0	1	0	CT	0	1	0	29	26	25	0	37	18	62	64	38	0	0	19	28	0	28	0	7	0	39	30	48	0	0	80	36	16	5	0	40	0	0
1981	31-Dec-21	11:00:00	1	0	1	0	CT	0	1	0	25	42	1	16	31	15	31	29	13	0	0	12	21	0	17	0	44	4	27	26	71	0	0	57	5	45	8	0	0	5	0
1982	31-Dec-21	11:05:00	1	0	1	0	CT	0	1	0	0	38	0	36	17	23	13	11	20	14	0	8	14	0	14	0	34	2	16	14	0	0	0	61	3	50	8	0	0	34	0
1983	31-Dec-21	11:10:00	1	0	1	0	CT	0	1	0	0	47	3	23	16	39	0	38	7	46	0	45	43	0	32	0	12	23	27	22	2	0	0	28	9	49	0	8	0	36	0
1984	31-Dec-21	11:15:00	1	0	1	0	CT	0	1	0	0	27	0	18	27	20	0	9	7	41	0	32	26	0	26	0	41	31	17	15	12	0	1	8	2	33	10	24	0	22	5
1985	31-Dec-21	11:20:00	1	0	1	0	CT	0	1	0	0	7	2	0	22	18	0	0	12	33	8	50	15	0	1	0	28	0	27	41	0	0	1	7	0	35	17	0	9	26	36
1986	31-Dec-21	11:25:00	1	0	1	0	CT	0	1	0	0	22	15	0	32	20	0	0	36	25	18	40	34	0	0	0	1	0	13	16	0	0	11	0	0	34	7	6	8	3	10
1987	31-Dec-21	11:30:00	1	0	1	0	CT	0	1	0	0	37	9	0	30	21	0	0	21	0	36	42	49	0	0	0	0	0	17	26	0	0	0	37	0	40	20	1	19	35	17
1988	31-Dec-21	11:35:00	1	0	1	0	CT	0	1	5	0	38	42	0	34	6	0	0	32	3	30	37	11	0	8	0	1	0	14	29	0	0	0	29	0	30	37	1	11	37	9
1989	31-Dec-21	11:40:00	1	0	1	0	CT	0	1	0	0	39	11	0	13	11	0	0	0	32	17	30	23	0	22	0	0	0	23	28	20	0	34	7	0	37	28	22	5	9	0
1990	31-Dec-21	11:45:00	1	0	1	0	CT	0	1	18	0	40	21	0	15	9	3	0	0	9	0	58	17	0	70	0	0	17	42	5	45	0	0	30	0	40	36	7	32	31	0
1991	31-Dec-21	11:50:00	1	0	1	0	CT	0	1	0	0	24	0	0	16	29	28	0	0	0	15	30	25	0	36	0	11	82	20	32	33	0	0	5	0	48	21	3	51	22	0
1992	31-Dec-21	11:55:00	1	0	1	0	CT	0	1	0	15	60	0	0	9	18	30	0	0	10	4	54	40	0	18	0	34	23	46	52	45	0	0	0	11	34	7	30	6	14	5
1993	31-Dec-21	12:00:00	1	0	1	0	CT	0	1	0	52	52	6	0	18	7	38	1	0	7	0	34	40	0	18	0	45	28	33	18	0	0	0	0	15	14	9	0	3	35	4
1994	31-Dec-21	12:05:00	1	0	1	0	CT	0	1	0	0	36	71	32	33	13	28	41	0	0	0	30	29	0	23	0	62	39	16	29	0	0	0	71	16	37	42	63	0	36	4
1995	31-Dec-21	12:10:00	1	0	1	0	CT	0	1	0	19	13	0	52	10	0	47	25	0	0	0	0	20	0	17	0	77	55	2	38	0	0	0	67	47	7	23	16	6	18	43
1996	31-Dec-21	12:15:00	1	0	1	0	CT	0	1	0	22	29	36	47	26	20	20	6	0	2	0	0	23	0	15	0	32	30	0	35	0	0	0	66	41	87	22	3	20	33	0
1997	31-Dec-21	12:20:00	1	0	1	0	CT	0	1	0	62	27	35	31	9	40	0	4	0	0	0	0	27	0	77	0	57	10	0	39	0	0	0	8	43	41	20	48	0	40	0
1998	31-Dec-21	12:25:00	1	0	1	0	CT	0	1	0	24	24	7	0	44	18	0	2	0	4	1	1	23	0	14	0	39	9	0	27	0	0	0	4	18	33	9	13	0	22	0
1999	31-Dec-21	12:30:00	1	0	1	0	CT	0	1	0	13	49	4	0	31	7	0	0	16	0	0	1	18	0	73	0	0	0	0	22	0	0	0	1	4	23	0	5	0	12	14
2000	31-Dec-21	12:35:00	1	0	1	0	CT	0	1	0	0	35	0	0	34	6	0	0	28	0	36	0	28	0	40	0	23	0	0	7	0	0	0	24	1	16	0	45	0	45	2
2001	31-Dec-21	12:40:00	1	0	1	0	CT	0	1	0	0	37	0	0	49	2	0	0	45	1	37	0	29	0	39	0	43	0	0	27	0	0	47	0	0	8	0	26	5	14	1
2002	31-Dec-21	12:45:00	1	0	1	0	CT	0	1	0	0	13	4	0	31	0	0	0	11	7	54	0	27	0	0	0	26	0	0	35	1	0	20	18	4	20	0	0	0	32	0
2003	31-Dec-21	12:50:00	1	0	1	0	CT	0	1	0	0	0	18	0	25	0	0	0	50	0	3	2	19	0	0	0	0	0	0	37	11	0	0	44	4	52	0	0	0	53	1
2004	31-Dec-21	12:55:00	1	0	1	0	CT	0	1	0	0	0	0	0	36	0	0	0	14	0	0	0	31	0	0	0	26	0	0	24	36	0	0	36	5	20	27	0	0	29	17
2005	31-Dec-21	13:00:00	1	0	1	0	CT	0	1	0	0	23	0	0	9	0	0	0	18	0	0	3	18	0	70	0	15	0	0	10	9	0	0	12	1	33	39	0	15	25	0
2006	31-Dec-21	13:05:00	1	0	1	0	CT	0	1	63	0	1	0	0	19	0	0	0	26	0	0	0	20	0	57	0	0	0	0	18	3	0	0	1	26	37	34	0	38	12	0
2007	31-Dec-21	13:10:00	1	0	1	0	CT	0	1	63	0	8	46	0	21	0	33	0	0	0	0	0	13	0	36	0	0	0	3	27	19	0	0	14	33	57	4	0	13	0	0
2008	31-Dec-21	13:15:00	1	0	1	0	CT	0	1	2	3	24	6	0	70	0	40	47	0	0	0	0	6	0	18	0	0	47	28	24	0	0	0	0	47	15	0	0	5	4	0
2009	31-Dec-21	13:20:00	1	0	1	0	CT	0	1	0	44	27	4	0	20	0	71	57	0	0	0	0	37	0	32	0	1	45	45	26	30	0	0	3	26	5	0	36	0	5	0
2010	31-Dec-21	13:25:00	1	0	1	0	CT	0	1	0	26	36	0	0	36	0	78	33	0	2	0	0	19	0	36	0	37	36	12	19	2	0	0	53	5	0	0	60	0	15	0
2011	31-Dec-21	13:30:00	1	0	1	0	CT	0	1	29	13	38	0	0	21	4	37	0	0	8	11	0	11	0	63	0	7	21	42	23	0	0	0	61	9	27	5	0	0	3	0
2012	31-Dec-21	13:35:00	1	0	1	0	CT	0	1	3	6	16	0	30	6	43	43	0	0	3	0	0	22	0	37	0	18	0	27	26	0	0	0	0	5	18	9	0	1	24	40
2013	31-Dec-21	13:40:00	1	0	1	0	CT	0	1	0	12	6	3	27	0	43	32	0	0	2	0	0	12	0	12	0	47	0	5	18	0	0	0	6	10	21	14	0	12	16	1
2014	31-Dec-21	13:45:00	1	0	1	0	CT	0	1	0	14	60	66	50	13	24	15	0	0	0	0	0	26	0	0	0	51	0	3	25	0	0	0	85	0	32	66	0	0	32	21
2015	31-Dec-21	13:50:00	1	0	1	0	CT	0	1	0	0	51	7	13	0	16	38	0	0	0	0	4	11	0	8	0	5	0	44	15	0	0	0	0	12	28	15	0	0	0	0
2016	31-Dec-21	13:55:00	1	0	1	0	CT	0	1	0	0	33	49	0	18	15	0	0	8	0	0	8	21	0	9	0	39	2	9	41	0	0	0	0	8	5	36	0	0	13	0
2017	31-Dec-21	14:00:00	1	0	1	0	CT	0	1	1	1	34	45	0	20	22	0	0	0	1	0	22	22	0	29	0	61	27	26	27	0	0	0	67	28	8	44	3	0	1	16
2018	31-Dec-21	14:05:00	1	0	1	0	CT	0	1	63	0	8	0	0	24	15	0	5	0	0	0	70	20	0	51	0	36	45	8	29	0	0	0	50	10	0	25	66	0	22	5
2019	31-Dec-21	14:10:00	1	0	1	0	CT	0	1	0	0	7	0	0	18	11	0	0	0	1	10	64	38	0	57	0	37	77	30	31	0	0	0	55	9	0	20	35	0	18	0
2020	31-Dec-21	14:15:00	1	0	1	0	CT	0	1	0	3	0	0	0	0	0	0	0	0	0	8	51	28	0	35	0	16	37	11	21	3	0	1	63	18	0	9	13	0	37	0
2021	31-Dec-21	14:20:00	1	0	1	0	CT	0	1	0	1	0	0	0	0	0	0	0	0	2	0	53	11	0	21	0	0	7	24	28	17	0	4	53	21	0	18	0	0	7	0
2022	31-Dec-21	14:25:00	1	0	1	0	CT	0	1	0	4	0	10	0	12	0	0	4	5	4	0	54	20	0	1	0	0	0	10	40	42	0	0	0	61	0	18	0	0	34	0
2023	31-Dec-21	14:30:00	1	0	1	0	CT	0	1	0	4	0	0	0	11	0	0	3	31	0	0	35	21	0	16	0	0	0	9	34	35	0	21	6	40	0	8	0	0	20	0
2024	31-Dec-21	14:35:00	1	0	1	0	CT	0	1	0	13	0	0	0	11	0	0	0	59	38	1	28	14	0	8	0	0	2	6	39	40	0	33	0	22	0	26	0	0	26	0
2025	31-Dec-21	14:40:00	1	0	1	0	CT	0	1	0	4	0	0	0	21	0	0	0	15	29	26	9	15	0	5	0	11	0	0	29	1	0	58	17	8	0	4	0	0	0	0
2026	31-Dec-21	14:45:00	1	0	1	0	CT	0	1	1	6	0	0	0	17	0	55	0	25	33	7	0	24	0	0	0	3	0	0	24	0	0	53	12	30	0	0	0	31	4	38
2027	31-Dec-21	14:50:00	1	0	1	0	CT	0	1	66	3	3	0	0	23	0	25	1	24	0	0	0	19	0	0	0	0	0	0	39	0	0	36	7	56	0	0	0	0	36	14
2028	31-Dec-21	14:55:00	1	0	1	0	CT	0	1	36	0	0	0	0	12	0	55	0	29	0	0	0	30	0	0	0	11	0	0	34	0	0	2	0	43	0	0	17	0	24	1
2029	31-Dec-21	15:00:00	1	0	1	0	CT	0	1	13	0	4	0	0	13	0	43	0	17	0	0	0	31	0	0	0	35	0	0	29	0	0	1	22	51	0	0	0	23	30	0
2030	31-Dec-21	15:05:00	1	0	1	0	CT	0	1	0	0	40	0	41	3	16	32	5	32	0	0	0	9	0	0	0	27	0	0	11	0	0	1	41	37	0	0	0	20	34	0
2031	31-Dec-21	15:10:00	1	0	1	0	CT	0	1	0	0	34	0	0	12	10	13	1	19	0	0	0	22	0	1	0	5	0	0	51	0	0	0	1	57	0	0	0	28	14	0
2032	31-Dec-21	15:15:00	1	0	1	0	CT	0	1	0	0	4	0	0	4	15	26	28	15	0	0	0	25	0	22	0	22	0	0	52	0	0	0	8	12	1	2	1	32	30	11
2033	31-Dec-21	15:20:00	1	0	1	0	CT	0	1	0	0	3	15	0	8	35	20	38	0	0	0	0	11	0	42	0	66	1	0	28	0	0	0	19	0	49	11	3	50	23	13
2034	31-Dec-21	15:25:00	1	0	1	0	CT	0	1	0	0	0	2	0	31	46	0	0	0	0	23	2	9	0	60	0	46	31	0	29	7	0	0	0	2	20	56	8	1	41	8
2035	31-Dec-21	15:30:00	1	0	1	0	CT	0	1	0	0	1	9	0	12	66	0	0	0	4	7	21	15	0	44	0	39	29	0	40	17	0	0	0	0	49	21	2	14	0	18
2036	31-Dec-21	15:35:00	1	0	1	0	CT	0	1	0	0	0	3	0	16	34	0	0	0	6	40	23	30	0	44	0	11	58	0	31	63	0	0	0	0	36	56	0	6	0	0
2037	31-Dec-21	15:40:00	1	0	1	0	CT	0	1	1	0	0	8	0	16	29	0	0	0	0	15	48	14	0	28	0	51	53	0	28	35	0	5	0	0	16	24	44	0	0	0
2038	31-Dec-21	15:45:00	1	0	1	0	CT	0	1	37	0	1	53	0	1	62	0	0	0	0	0	48	6	0	21	0	45	45	0	24	22	0	0	26	0	2	34	79	37	0	1
2039	31-Dec-21	15:50:00	1	0	1	0	CT	0	1	11	0	2	10	0	13	16	0	1	0	0	0	40	16	0	7	0	34	0	0	44	4	0	0	97	0	54	28	29	0	0	0
2040	31-Dec-21	15:55:00	1	0	1	0	CT	0	1	0	0	14	16	0	9	25	0	0	3	0	0	36	10	0	4	0	14	0	0	28	0	0	48	95	0	27	8	0	4	0	0
2041	31-Dec-21	16:00:00	1	0	1	0	CT	0	1	0	0	6	0	0	10	9	0	0	0	0	0	30	5	0	6	0	0	0	0	6	0	0	0	0	0	31	9	0	0	0	0
2042	31-Dec-21	16:05:00	1	0	1	0	CT	0	0	0	0	0	0	0	0	1	0	0	0	0	0	0	0	0	0	0	0	0	0	0	0	0	1	0	0	0	0	0	0	0	6
2043	31-Dec-21	16:10:00	1	0	1	0	CT	0	0	0	22	0	0	6	0	0	0	0	0	0	0	0	0	0	0	0	0	0	0	0	0	0	1	0	0	0	0	0	0	0	3
2044	31-Dec-21	16:15:00	1	0	1	0	CT	0	0	27	13	0	0	0	0	0	0	0	0	0	1	0	0	0	0	0	0	0	0	1	0	0	0	4	0	0	0	0	0	3	3
2045	31-Dec-21	16:20:00	1	0	1	0	CT	0	0	9	53	59	0	42	0	0	0	0	0	0	0	2	0	0	0	0	0	0	0	0	0	0	16	25	0	0	0	0	0	27	25
2046	31-Dec-21	16:25:00	1	0	1	0	CT	0	0	50	41	40	0	87	0	0	0	40	0	0	0	0	0	0	0	0	0	0	0	0	7	0	0	6	0	0	0	0	0	35	7
2047	31-Dec-21	16:30:00	1	0	1	0	CT	0	0	7	22	72	3	70	1	0	0	32	0	2	0	0	0	0	0	0	0	0	0	0	33	0	0	0	0	0	0	0	3	0	6
2048	31-Dec-21	16:35:00	1	0	1	0	CT	0	0	0	16	44	52	21	5	0	0	80	0	0	0	0	0	0	0	0	48	0	0	0	94	0	0	2	0	0	0	0	0	0	0
2049	31-Dec-21	16:40:00	1	0	1	0	CT	0	0	19	35	53	17	0	0	0	0	7	0	0	0	0	0	0	0	0	50	0	0	0	38	0	0	52	0	0	1	60	0	0	0
2050	31-Dec-21	16:45:00	1	0	1	0	CT	0	0	8	25	60	0	0	0	0	0	0	0	0	0	0	0	0	6	0	27	0	5	0	27	0	0	48	0	0	0	46	0	0	50
2051	31-Dec-21	16:50:00	1	0	1	0	CT	0	0	28	23	40	0	0	0	1	11	0	0	0	0	10	0	0	11	0	25	0	27	0	16	0	25	0	0	0	0	10	0	0	24
2052	31-Dec-21	16:55:00	1	0	1	0	CT	0	0	0	0	54	0	0	4	0	1	1	0	17	43	28	0	0	0	0	60	58	48	0	0	0	44	0	0	0	0	5	0	0	27
2053	31-Dec-21	17:00:00	1	0	1	0	CT	0	0	32	18	6	0	0	0	0	15	0	0	0	90	41	0	0	14	0	51	40	79	0	0	0	10	2	0	0	0	0	9	0	3
2054	31-Dec-21	17:05:00	1	0	1	0	CT	0	0	15	25	0	0	0	0	1	43	0	0	37	45	70	0	0	82	0	0	62	85	3	0	0	0	0	0	0	0	0	0	0	19
2055	31-Dec-21	17:10:00	1	0	1	0	CT	0	0	0	46	32	0	0	0	0	27	0	0	50	15	47	0	0	37	0	0	74	0	7	0	0	0	0	0	0	0	0	1	8	0
2056	31-Dec-21	17:15:00	1	0	1	0	CT	0	0	5	14	68	35	0	0	4	6	8	0	30	0	26	0	0	0	0	0	38	0	3	0	0	0	0	0	0	0	61	0	13	0
2057	31-Dec-21	17:20:00	1	0	1	0	CT	0	0	0	0	32	0	41	12	3	0	79	0	0	0	59	21	0	0	0	0	76	0	50	0	0	3	0	0	0	0	25	0	39	5
2058	31-Dec-21	17:25:00	1	0	1	0	CT	0	0	0	22	33	0	68	25	24	0	23	3	0	0	23	0	0	0	0	50	72	0	92	0	0	50	63	0	0	0	54	0	10	10
2059	31-Dec-21	17:30:00	1	0	1	0	CT	0	0	0	14	37	0	62	38	14	0	17	2	0	0	44	0	0	6	0	51	28	0	69	0	0	49	16	4	0	0	55	0	0	4
2060	31-Dec-21	17:35:00	1	0	1	0	CT	0	0	0	0	45	25	31	32	30	0	0	0	46	55	47	0	0	23	0	14	78	0	17	0	0	0	0	0	0	4	29	0	0	34
2061	31-Dec-21	17:40:00	1	0	1	0	CT	0	0	0	0	47	63	76	0	26	0	49	0	0	20	27	3	0	34	0	0	77	17	30	0	0	41	24	0	0	0	13	9	0	17
2062	31-Dec-21	17:45:00	1	0	1	0	CT	0	0	0	39	0	5	0	0	2	7	16	0	0	0	44	0	0	33	0	0	33	78	0	0	0	35	6	0	0	0	0	41	0	0
2063	31-Dec-21	17:50:00	1	0	1	0	CT	0	0	16	17	62	0	0	0	0	38	0	0	0	0	34	0	0	0	0	0	56	38	0	0	0	21	1	27	0	6	42	48	2	0
2064	31-Dec-21	17:55:00	1	0	1	0	CT	0	0	0	33	56	0	0	0	8	52	0	0	0	0	25	0	0	0	0	41	69	64	7	0	0	0	7	20	0	2	25	0	1	0
2065	31-Dec-21	18:00:00	1	0	1	0	CT	0	0	21	0	38	0	0	10	30	60	0	0	0	0	36	4	0	0	0	37	77	10	20	7	0	0	59	6	0	19	0	0	0	0
2066	31-Dec-21	18:05:00	1	0	1	0	CT	0	0	27	0	20	0	40	4	40	9	66	0	0	0	29	0	0	34	0	22	36	2	73	0	0	0	39	1	21	0	22	0	0	0
2067	31-Dec-21	18:10:00	1	0	1	0	CT	0	0	24	0	40	0	47	39	32	2	53	0	0	18	32	0	0	49	0	1	67	0	77	81	0	1	25	1	0	0	56	0	0	0
2068	31-Dec-21	18:15:00	1	0	1	0	CT	0	0	0	0	55	33	66	0	22	0	0	0	0	76	58	0	0	7	0	38	46	0	8	53	0	18	43	2	0	0	46	0	3	16
2069	31-Dec-21	18:20:00	1	0	1	0	CT	0	0	0	0	61	0	46	28	26	0	0	14	13	34	67	0	0	0	0	32	76	0	16	48	0	48	46	5	0	0	46	0	0	5
2070	31-Dec-21	18:25:00	1	0	1	0	CT	0	0	3	0	51	0	59	6	34	0	0	32	16	26	43	0	0	0	0	60	47	0	7	20	0	33	10	0	0	0	2	44	0	10
2071	31-Dec-21	18:30:00	1	0	1	0	CT	0	0	32	0	49	0	58	0	36	0	0	32	29	0	26	0	0	0	0	36	21	0	23	45	0	1	2	0	5	0	0	0	0	29
2072	31-Dec-21	18:35:00	1	0	1	0	CT	0	0	9	0	2	62	44	0	4	1	43	1	42	0	34	3	0	0	0	60	0	0	37	20	0	1	10	0	34	0	50	0	9	0
2073	31-Dec-21	18:40:00	1	0	1	0	CT	0	0	0	1	53	71	0	2	16	9	12	0	17	5	35	64	0	0	0	45	0	0	99	52	0	1	20	8	63	0	60	0	0	0
2074	31-Dec-21	18:45:00	1	0	1	0	CT	0	0	0	41	54	60	40	10	1	71	61	0	30	44	35	17	0	0	0	22	0	14	0	23	0	1	46	0	52	0	7	21	0	0
2075	31-Dec-21	18:50:00	1	0	1	0	CT	0	0	0	0	7	17	31	18	0	51	4	5	28	23	40	39	0	0	0	0	0	33	83	54	0	0	42	0	64	0	3	0	0	0
2076	31-Dec-21	18:55:00	1	0	1	0	CT	0	0	0	12	0	29	0	0	0	23	0	5	8	38	30	41	0	0	0	3	0	23	12	14	0	17	46	16	0	14	9	0	10	0
2077	31-Dec-21	19:00:00	1	0	1	0	CT	0	0	9	26	13	0	3	20	0	28	0	4	0	19	42	0	0	2	0	47	0	55	0	30	0	62	60	38	0	15	63	0	37	2
2078	31-Dec-21	19:05:00	1	0	1	0	CT	0	0	23	34	35	0	55	75	0	23	31	45	0	19	40	0	0	21	0	19	0	9	29	62	0	0	6	8	0	0	16	0	0	64
2079	31-Dec-21	19:10:00	1	0	1	0	CT	0	0	14	42	30	6	42	2	7	0	1	0	0	20	23	0	0	42	0	0	18	1	27	0	0	0	49	16	0	76	9	0	2	10
2080	31-Dec-21	19:15:00	1	0	1	0	CT	0	0	25	9	31	0	0	2	31	0	2	0	0	18	23	0	0	62	0	31	49	15	14	0	0	28	0	63	7	5	0	0	6	0
2081	31-Dec-21	19:20:00	1	0	1	0	CT	0	0	53	29	52	0	17	9	22	0	1	0	0	0	35	0	0	4	0	3	51	20	25	4	0	57	5	6	60	0	2	0	2	0
2082	31-Dec-21	19:25:00	1	0	1	0	CT	0	0	2	20	32	35	7	3	1	0	3	4	1	1	58	52	0	0	0	31	60	45	22	46	0	0	1	7	84	0	70	0	1	0
2083	31-Dec-21	19:30:00	1	0	1	0	CT	0	0	14	11	0	24	0	0	24	19	64	33	48	24	72	27	0	0	0	34	71	56	18	38	0	0	0	14	36	10	20	23	1	0
2084	31-Dec-21	19:35:00	1	0	1	0	CT	0	0	4	46	16	7	1	0	3	50	44	71	21	6	39	0	0	0	0	26	62	8	15	0	0	2	0	17	0	0	0	2	15	0
2085	31-Dec-21	19:40:00	1	0	1	0	CT	0	0	26	0	64	0	37	0	0	33	59	10	34	22	47	16	0	0	0	0	57	0	1	7	0	0	1	15	0	1	12	0	10	0
2086	31-Dec-21	19:45:00	1	0	1	0	CT	0	0	22	14	45	0	39	0	0	48	38	32	27	54	8	21	0	0	0	1	47	19	2	8	0	0	86	0	39	12	60	22	0	35
2087	31-Dec-21	19:50:00	1	0	1	0	CT	0	0	9	26	33	23	45	49	0	0	54	42	1	37	12	0	0	0	0	50	55	0	33	12	0	33	83	0	34	11	66	33	0	3
2088	31-Dec-21	19:55:00	1	0	1	0	CT	0	0	38	31	43	24	0	23	0	0	35	40	0	41	45	0	0	0	0	14	63	0	80	0	0	57	62	0	40	3	16	0	0	0
2089	31-Dec-21	20:00:00	1	0	1	0	CT	0	0	16	0	3	44	53	0	0	16	58	19	0	10	33	0	0	0	0	0	48	0	74	0	0	0	7	20	13	35	0	0	0	0
2090	31-Dec-21	20:05:00	1	0	1	0	CT	0	0	0	16	25	3	61	17	25	38	0	0	0	30	41	0	0	10	0	45	68	0	0	0	0	0	16	28	41	0	0	0	0	0
2091	31-Dec-21	20:10:00	1	0	1	0	CT	0	0	9	41	60	0	33	0	37	54	0	1	0	43	46	0	0	66	0	37	57	0	14	0	0	0	0	17	28	6	0	0	5	0
2092	31-Dec-21	20:15:00	1	0	1	0	CT	0	0	16	8	40	16	0	0	28	13	0	3	16	12	25	2	0	2	0	11	63	0	56	0	0	0	50	8	35	27	1	16	28	0
2093	31-Dec-21	20:20:00	1	0	1	0	CT	0	0	56	11	45	25	3	9	51	78	0	12	18	17	33	17	0	0	0	59	3	0	58	8	0	0	32	24	1	8	5	0	8	0
2094	31-Dec-21	20:25:00	1	0	1	0	CT	0	0	7	2	2	8	7	8	18	25	33	22	4	63	31	4	0	8	0	54	99	0	2	102	0	0	31	56	31	0	0	0	31	1
2095	31-Dec-21	20:30:00	1	0	1	0	CT	0	0	7	6	14	0	57	28	12	60	67	15	0	17	30	0	0	20	0	4	86	0	24	41	0	9	20	29	22	9	47	0	2	6
2096	31-Dec-21	20:35:00	1	0	1	0	CT	0	0	38	45	86	13	30	60	32	26	52	0	0	50	27	0	0	16	0	50	78	23	52	26	0	46	46	54	13	32	80	0	20	23
2097	31-Dec-21	20:40:00	1	0	1	0	CT	0	0	11	14	29	20	39	27	36	54	7	0	0	26	32	39	0	0	0	59	45	26	53	49	0	1	73	71	17	9	1	0	5	52
2098	31-Dec-21	20:45:00	1	0	1	0	CT	0	0	0	9	16	50	20	32	27	1	69	67	0	0	42	69	0	0	0	5	79	39	72	34	0	3	58	16	23	25	10	0	0	0
2099	31-Dec-21	20:50:00	1	0	1	0	CT	0	0	13	35	59	0	6	14	8	40	5	28	18	0	38	58	0	0	0	32	59	35	53	58	0	14	66	10	44	29	0	0	0	1
2100	31-Dec-21	20:55:00	1	0	1	0	CT	0	0	31	6	37	0	7	50	0	0	0	17	22	0	40	0	0	50	0	46	87	23	22	61	0	0	0	19	25	23	0	3	0	5
2101	31-Dec-21	21:00:00	1	0	1	0	CT	0	0	7	10	35	0	53	23	0	0	0	0	26	0	36	0	0	71	0	48	37	20	7	61	0	0	9	28	27	32	0	0	33	11
2102	31-Dec-21	21:05:00	1	0	1	0	CT	0	0	28	36	63	3	35	24	0	0	0	3	7	0	38	0	0	75	0	42	47	1	18	66	0	44	22	36	1	24	0	0	22	0
2103	31-Dec-21	21:10:00	1	0	1	0	CT	0	0	44	44	65	12	38	26	10	0	51	9	25	14	26	0	0	71	0	32	42	0	0	32	0	10	44	0	0	14	0	0	16	64
2104	31-Dec-21	21:15:00	1	0	1	0	CT	0	0	17	0	32	0	30	0	32	0	29	35	14	0	67	13	0	46	0	58	30	7	53	0	0	0	58	13	28	0	0	0	5	0
2105	31-Dec-21	21:20:00	1	0	1	0	CT	0	0	0	13	37	57	0	18	14	0	0	13	36	5	43	35	0	35	0	38	69	32	41	41	0	0	32	22	36	3	0	11	0	0
2106	31-Dec-21	21:25:00	1	0	1	0	CT	0	0	21	0	63	17	0	30	0	0	39	58	12	1	33	45	0	0	0	22	58	48	45	14	0	0	6	0	0	0	39	3	0	0
2107	31-Dec-21	21:30:00	1	0	1	0	CT	0	0	11	0	32	0	0	11	0	0	36	22	17	0	28	0	0	0	0	3	73	7	43	1	0	0	48	0	27	0	24	0	27	0
2108	31-Dec-21	21:35:00	1	0	1	0	CT	0	0	3	0	51	9	22	15	26	0	27	22	22	0	31	3	0	0	0	39	44	25	16	19	0	23	55	37	69	6	49	0	22	0
2109	31-Dec-21	21:40:00	1	0	1	0	CT	0	0	0	0	33	47	53	15	29	0	0	28	39	0	37	1	0	0	0	47	45	42	0	3	0	17	65	36	10	0	20	8	22	0
2110	31-Dec-21	21:45:00	1	0	1	0	CT	0	0	0	0	8	35	30	14	0	0	0	68	12	0	26	2	0	0	0	56	52	26	54	63	0	14	97	0	0	0	5	17	18	0
2111	31-Dec-21	21:50:00	1	0	1	0	CT	0	0	93	0	1	0	39	9	14	0	0	32	26	0	25	38	0	0	0	36	35	4	45	0	0	34	35	0	75	0	6	0	22	0
2112	31-Dec-21	21:55:00	1	0	1	0	CT	0	0	20	22	42	1	0	0	46	7	0	34	18	11	53	74	0	4	0	11	64	6	43	0	0	3	57	0	38	0	12	0	20	0
2113	31-Dec-21	22:00:00	1	0	1	0	CT	0	0	13	14	53	63	42	23	12	17	0	32	9	37	33	24	0	44	0	31	46	48	18	0	0	1	51	54	58	0	13	0	17	0
2114	31-Dec-21	22:05:00	1	0	1	0	CT	0	0	24	60	44	10	46	28	30	13	70	69	0	0	2	9	0	13	0	91	57	16	42	6	0	39	60	42	29	7	4	0	22	0
2115	31-Dec-21	22:10:00	1	0	1	0	CT	0	0	19	0	71	0	40	55	24	15	39	5	17	2	34	0	0	31	0	71	6	0	35	35	0	19	48	33	41	4	58	0	7	0
2116	31-Dec-21	22:15:00	1	0	1	0	CT	0	0	1	0	32	0	10	64	17	43	72	0	33	31	49	0	0	23	0	9	50	0	53	11	0	16	45	0	63	23	28	0	25	0
2117	31-Dec-21	22:20:00	1	0	1	0	CT	0	0	1	30	10	0	1	27	12	47	39	0	28	2	29	10	0	0	0	37	68	13	19	0	0	38	23	16	123	14	61	0	18	30
2118	31-Dec-21	22:25:00	1	0	1	0	CT	0	0	0	30	39	0	84	0	8	55	8	23	8	2	30	36	0	0	0	21	26	39	60	49	0	13	59	55	30	0	43	0	38	25
2119	31-Dec-21	22:30:00	1	0	1	0	CT	0	0	3	16	38	23	49	60	2	63	0	37	0	0	44	32	0	5	0	33	65	22	82	44	0	36	56	48	34	0	2	0	11	18
2120	31-Dec-21	22:35:00	1	0	1	0	CT	0	0	13	34	37	44	37	10	42	48	0	15	1	0	32	29	0	19	0	40	88	10	4	9	0	69	66	1	49	0	63	0	27	13
2121	31-Dec-21	22:40:00	1	0	1	0	CT	0	0	14	50	15	52	52	35	44	63	0	50	8	24	25	28	0	29	0	3	45	0	26	0	0	44	30	46	12	10	15	0	0	3
2122	31-Dec-21	22:45:00	1	0	1	0	CT	0	0	3	16	11	20	25	0	13	15	26	28	29	79	32	2	0	41	0	2	74	0	0	40	0	16	62	41	8	11	0	0	0	37
2123	31-Dec-21	22:50:00	1	0	1	0	CT	0	0	25	27	29	69	40	37	19	66	44	0	35	19	29	0	0	62	0	41	68	32	77	12	0	65	0	8	55	0	0	0	9	20
2124	31-Dec-21	22:55:00	1	0	1	0	CT	0	0	25	21	40	72	67	10	70	21	63	5	36	12	38	46	0	57	0	69	29	43	60	53	0	63	0	0	42	0	32	33	0	35
2125	31-Dec-21	23:00:00	1	0	1	0	CT	0	0	30	33	30	7	47	33	49	83	0	8	13	0	36	24	0	0	0	41	34	68	48	45	0	63	1	29	71	0	3	52	69	25
2126	31-Dec-21	23:05:00	1	0	1	0	CT	0	0	38	0	41	43	57	42	30	0	4	42	37	0	35	14	0	19	0	25	46	27	43	37	0	4	0	11	25	0	49	6	5	23
2127	31-Dec-21	23:10:00	1	0	1	0	CT	0	0	11	14	47	0	46	22	9	44	0	26	18	0	34	59	0	1	0	38	37	21	13	42	0	73	1	0	13	0	57	3	13	5
2128	31-Dec-21	23:15:00	1	0	1	0	CT	0	0	24	0	24	0	23	20	0	27	8	21	19	0	42	38	0	35	0	66	49	21	19	49	0	1	3	27	53	0	53	8	3	0
2129	31-Dec-21	23:20:00	1	0	1	0	CT	0	0	0	8	29	0	38	43	62	43	77	28	13	16	34	28	0	40	0	34	65	3	0	0	0	3	0	68	39	0	1	8	0	0
2130	31-Dec-21	23:25:00	1	0	1	0	CT	0	0	24	15	13	0	41	4	48	9	57	25	19	71	42	22	0	62	0	13	62	61	18	4	0	30	53	29	34	0	0	0	1	0
2131	31-Dec-21	23:30:00	1	0	1	0	CT	0	0	30	0	54	0	43	27	22	52	0	23	31	11	43	58	0	49	0	48	25	49	28	11	0	70	78	72	28	0	0	1	25	0
2132	31-Dec-21	23:35:00	1	0	1	0	CT	0	0	4	0	30	9	56	56	20	5	8	8	3	13	24	18	0	19	0	44	54	43	27	38	0	35	47	29	60	26	0	2	0	0
2133	31-Dec-21	23:40:00	1	0	1	0	CT	0	0	19	13	55	41	59	24	48	0	3	6	37	0	41	32	0	20	0	28	58	29	58	12	0	43	66	31	23	22	0	3	2	0
2134	31-Dec-21	23:45:00	1	0	1	0	CT	0	0	3	0	62	42	55	36	32	0	0	23	11	0	38	41	0	20	0	43	70	5	7	21	0	50	56	24	13	43	7	3	9	0
2135	31-Dec-21	23:50:00	1	0	1	0	CT	0	0	44	0	30	43	9	36	7	0	3	10	27	0	52	18	0	0	0	12	67	20	10	5	0	35	50	15	55	0	71	0	28	39
2136	31-Dec-21	23:55:00	1	0	1	0	CT	0	0	13	3	41	0	75	49	0	0	1	26	1	0	44	0	0	0	0	62	76	15	39	35	0	81	37	2	83	0	50	1	26	19
2137	1-Jan-22	0:00:00	1	0	1	0	CT	0	1	19	0	50	0	69	11	48	2	0	26	0	1	26	1	0	0	0	56	54	7	4	0	0	63	2	7	23	0	57	1	0	30
2138	1-Jan-22	0:05:00	1	0	1	0	CT	0	1	9	46	44	1	63	39	58	55	2	16	0	24	47	20	0	20	0	56	91	57	79	17	0	13	86	65	80	31	34	40	43	25
2139	1-Jan-22	0:10:00	1	0	1	0	CT	0	1	0	0	35	64	36	50	6	56	28	37	28	0	50	34	0	56	0	42	45	6	88	0	0	0	95	50	52	29	7	14	48	13
2140	1-Jan-22	0:15:00	1	0	1	0	CT	0	1	1	11	66	8	18	36	23	54	54	40	43	40	49	64	0	58	0	61	39	0	60	0	0	0	57	33	56	12	46	50	27	40
2141	1-Jan-22	0:20:00	1	0	1	0	CT	0	1	0	3	61	0	4	43	0	51	67	17	17	0	37	77	0	25	0	33	6	51	34	0	0	0	43	26	40	8	65	56	49	17
2142	1-Jan-22	0:25:00	1	0	1	0	CT	0	1	0	21	71	38	20	48	22	69	34	10	0	0	30	71	0	39	0	58	79	39	69	0	0	14	46	17	49	49	0	0	10	5
2143	1-Jan-22	0:30:00	1	0	1	0	CT	0	1	15	16	20	30	1	36	39	70	45	27	0	13	43	26	0	24	0	61	43	31	67	0	0	27	71	52	86	18	27	0	29	59
2144	1-Jan-22	0:35:00	1	0	1	0	CT	0	1	55	17	25	0	0	11	33	63	1	3	26	0	32	20	0	23	0	20	61	14	54	0	0	1	50	37	45	11	84	0	10	41
2145	1-Jan-22	0:40:00	1	0	1	0	CT	0	1	62	27	56	5	77	35	7	85	0	43	9	3	46	60	0	80	0	46	42	24	34	32	0	40	25	37	51	17	35	0	37	0
2146	1-Jan-22	0:45:00	1	0	1	0	CT	0	1	36	16	31	16	38	31	0	58	0	17	37	27	38	34	0	28	0	58	32	36	41	34	0	45	0	33	18	20	33	0	13	0
2147	1-Jan-22	0:50:00	1	0	1	0	CT	0	1	23	19	42	33	32	27	20	36	0	38	39	34	25	22	0	18	0	74	45	28	35	27	0	22	0	25	60	28	44	0	0	2
2148	1-Jan-22	0:55:00	1	0	1	0	CT	0	1	78	19	78	23	26	14	46	19	0	37	24	16	37	33	0	0	0	49	55	0	59	68	0	0	34	76	76	4	58	0	49	0
2149	1-Jan-22	1:00:00	1	0	1	0	CT	0	1	60	20	40	13	6	28	14	39	0	42	9	29	38	33	0	0	0	36	52	0	50	16	0	0	72	3	14	17	1	58	46	41
2150	1-Jan-22	1:05:00	1	0	1	0	CT	0	1	0	13	51	0	81	34	22	31	0	74	10	43	72	26	0	0	0	30	40	18	58	6	0	0	1	46	45	12	11	26	16	3
2151	1-Jan-22	1:10:00	1	0	1	0	CT	0	1	0	26	39	18	27	28	14	37	0	44	0	45	40	70	0	18	0	57	69	30	37	16	0	29	63	44	38	17	0	42	2	0
2152	1-Jan-22	1:15:00	1	0	1	0	CT	0	1	17	19	62	38	49	67	58	23	0	51	0	47	39	22	0	44	0	58	42	39	0	15	0	29	56	14	18	11	41	43	0	0
2153	1-Jan-22	1:20:00	1	0	1	0	CT	0	1	10	9	58	19	38	34	19	46	0	67	0	6	24	27	0	32	0	8	80	47	46	3	0	0	19	27	13	20	61	26	12	1
2154	1-Jan-22	1:25:00	1	0	1	0	CT	0	1	1	12	54	20	19	30	7	27	0	13	0	9	29	49	0	8	0	12	39	7	7	3	0	7	15	5	21	47	32	45	26	46
2155	1-Jan-22	1:30:00	1	0	1	0	CT	0	1	41	27	35	0	0	25	57	29	0	24	0	23	31	38	0	47	0	20	61	0	0	0	0	79	0	48	41	37	3	51	17	66
2156	1-Jan-22	1:35:00	1	0	1	0	CT	0	1	19	14	29	18	8	40	16	16	0	14	16	19	52	38	0	32	0	37	58	3	0	0	0	28	46	18	21	38	6	0	14	14
2157	1-Jan-22	1:40:00	1	0	1	0	CT	0	1	0	10	39	16	5	24	19	0	0	2	28	17	34	46	0	3	0	58	66	35	24	0	0	10	104	29	42	31	4	0	36	13
2158	1-Jan-22	1:45:00	1	0	1	0	CT	0	1	39	16	39	56	9	20	2	0	0	4	5	51	19	0	0	2	0	30	48	24	56	1	0	28	70	20	58	26	0	0	26	0
2159	1-Jan-22	1:50:00	1	0	1	0	CT	0	1	0	57	36	32	0	37	0	0	0	35	0	22	38	15	0	0	0	35	59	12	15	3	0	0	74	0	36	27	1	0	17	0
2160	1-Jan-22	1:55:00	1	0	1	0	CT	0	1	0	36	58	11	1	11	34	0	0	38	0	13	44	30	0	0	0	11	48	17	9	25	0	0	48	5	7	18	0	0	6	0
2161	1-Jan-22	2:00:00	1	0	1	0	CT	0	1	12	15	44	0	1	42	46	0	0	24	0	21	15	32	0	24	0	60	54	0	0	47	0	0	50	0	33	12	0	0	22	0
2162	1-Jan-22	2:05:00	1	0	1	0	CT	0	1	0	11	19	14	2	32	52	0	0	14	0	42	19	11	0	45	0	45	45	0	2	28	0	0	33	17	24	12	0	0	4	0
2163	1-Jan-22	2:10:00	1	0	1	0	CT	0	1	0	13	53	0	8	37	31	0	2	15	0	8	29	0	0	35	0	23	12	0	3	9	0	0	1	40	25	1	6	0	46	0
2164	1-Jan-22	2:15:00	1	0	1	0	CT	0	1	0	0	49	4	60	72	25	0	0	71	0	38	10	6	0	13	0	25	59	0	0	25	0	1	4	88	41	13	19	0	21	0
2165	1-Jan-22	2:20:00	1	0	1	0	CT	0	1	0	15	37	43	61	18	15	0	0	43	0	3	39	2	0	49	0	24	56	0	4	43	0	1	8	40	21	32	0	0	20	0
2166	1-Jan-22	2:25:00	1	0	1	0	CT	0	1	0	0	30	65	44	24	4	0	0	34	1	0	4	32	0	34	0	14	11	14	31	10	0	19	4	9	32	10	0	0	15	0
2167	1-Jan-22	2:30:00	1	0	1	0	CT	0	1	0	0	52	27	20	17	42	0	0	32	32	0	0	18	0	10	0	0	0	31	51	76	0	0	0	48	49	12	0	0	0	0
2168	1-Jan-22	2:35:00	1	0	1	0	CT	0	1	0	0	35	45	0	17	34	0	0	10	27	0	0	30	0	0	0	24	0	40	13	18	0	0	0	25	37	1	0	0	16	0
2169	1-Jan-22	2:40:00	1	0	1	0	CT	0	1	0	0	52	27	0	23	54	0	0	12	0	0	0	13	0	0	0	1	0	6	3	22	0	0	32	2	39	36	0	0	46	22
2170	1-Jan-22	2:45:00	1	0	1	0	CT	0	1	0	4	40	6	0	21	0	0	0	44	1	9	0	0	0	0	0	0	0	0	39	10	0	0	23	9	28	62	16	0	1	2
2171	1-Jan-22	2:50:00	1	0	1	0	CT	0	1	0	0	14	3	0	21	2	0	0	36	14	0	0	0	0	0	0	5	0	0	0	0	0	0	25	10	13	11	0	0	7	20
2172	1-Jan-22	2:55:00	1	0	1	0	CT	0	1	0	0	31	7	0	33	7	0	0	19	14	2	0	7	0	0	0	14	0	0	25	0	0	0	23	8	11	26	0	7	1	0
2173	1-Jan-22	3:00:00	1	0	1	0	CT	0	1	0	0	49	38	0	27	2	0	0	12	13	0	0	14	0	0	0	53	0	0	33	0	0	0	42	31	12	11	0	28	24	0
2174	1-Jan-22	3:05:00	1	0	1	0	CT	0	1	0	0	46	6	0	19	14	0	1	47	21	0	0	2	0	0	0	34	0	2	27	0	0	0	0	30	48	33	0	63	2	0
2175	1-Jan-22	3:10:00	1	0	1	0	CT	0	1	0	0	18	7	0	13	5	25	63	7	34	2	0	17	0	0	0	0	0	0	17	0	0	0	1	14	30	27	0	18	39	0
2176	1-Jan-22	3:15:00	1	0	1	0	CT	0	1	0	0	20	0	0	7	0	45	0	0	0	53	5	35	0	2	0	6	0	1	29	0	0	0	0	30	16	28	0	41	28	0
2177	1-Jan-22	3:20:00	1	0	1	0	CT	0	1	0	0	2	0	16	14	0	13	0	20	0	15	3	19	0	10	0	0	0	0	92	0	0	0	0	11	50	33	0	4	16	0
2178	1-Jan-22	3:25:00	1	0	1	0	CT	0	1	0	0	9	3	11	3	0	0	0	0	0	0	0	24	0	6	0	15	0	0	73	0	0	0	0	11	29	23	7	0	3	0
2179	1-Jan-22	3:30:00	1	0	1	0	CT	0	1	0	0	5	5	2	16	0	0	0	0	0	0	0	14	0	41	0	29	0	0	33	0	0	0	0	0	7	12	2	0	0	0
2180	1-Jan-22	3:35:00	1	0	1	0	CT	0	1	0	0	20	4	0	21	0	0	0	0	25	8	0	1	0	52	0	15	0	0	0	0	0	0	0	0	0	25	0	0	0	0
2181	1-Jan-22	3:40:00	1	0	1	0	CT	0	1	0	0	69	5	0	16	0	0	0	0	3	0	12	11	0	43	0	29	0	0	0	0	0	0	19	0	13	0	22	0	3	0
2182	1-Jan-22	3:45:00	1	0	1	0	CT	0	1	82	0	36	13	0	0	0	0	0	0	0	0	3	14	0	37	0	39	0	0	18	0	0	0	0	0	19	26	9	0	5	0
2183	1-Jan-22	3:50:00	1	0	1	0	CT	0	1	30	0	23	4	0	5	0	0	0	0	0	0	5	15	0	40	0	11	0	0	51	0	0	0	0	0	28	12	7	0	32	0
2184	1-Jan-22	3:55:00	1	0	1	0	CT	0	1	7	0	22	2	0	14	0	0	0	0	0	0	30	8	0	34	0	4	12	2	15	21	0	0	0	6	42	12	2	0	8	0
2185	1-Jan-22	4:00:00	1	0	1	0	CT	0	1	0	0	0	5	0	9	0	0	0	0	2	14	37	4	0	0	0	0	11	1	21	20	0	0	1	4	1	14	4	0	10	0
2186	1-Jan-22	4:05:00	1	0	1	0	CT	0	1	0	0	9	0	0	8	0	0	8	0	0	2	14	1	0	0	0	0	67	0	40	10	0	0	0	0	4	12	0	2	28	0
2187	1-Jan-22	4:10:00	1	0	1	0	CT	0	1	1	34	8	17	0	15	36	0	50	0	1	0	1	0	0	0	0	41	26	0	15	0	0	0	0	18	19	0	5	0	22	0
2188	1-Jan-22	4:15:00	1	0	1	0	CT	0	1	0	10	7	5	1	21	37	3	0	0	16	0	0	0	0	0	0	43	0	5	10	4	0	0	26	4	37	0	1	0	21	0
2189	1-Jan-22	4:20:00	1	0	1	0	CT	0	1	2	7	0	0	6	31	7	19	0	0	5	0	0	0	0	0	0	19	0	37	20	0	0	0	103	6	5	22	0	0	6	0
2190	1-Jan-22	4:25:00	1	0	1	0	CT	0	1	0	13	0	33	4	22	34	44	4	0	3	0	0	0	0	0	0	1	0	37	47	0	0	26	96	3	50	10	0	0	0	8
2191	1-Jan-22	4:30:00	1	0	1	0	CT	0	1	1	0	3	0	2	4	27	45	0	0	16	0	0	0	0	2	0	2	6	32	9	0	0	10	59	0	38	48	0	0	1	34
2192	1-Jan-22	4:35:00	1	0	1	0	CT	0	1	15	0	7	0	16	20	10	11	0	0	0	0	0	0	0	41	0	11	0	0	29	0	0	0	82	2	65	34	0	0	0	18
2193	1-Jan-22	4:40:00	1	0	1	0	CT	0	1	10	16	29	0	0	25	0	0	0	0	0	0	0	0	0	41	0	3	0	0	52	0	0	0	13	0	5	10	44	3	0	13
2194	1-Jan-22	4:45:00	1	0	1	0	CT	0	1	2	31	3	0	0	27	0	0	0	0	0	0	0	0	0	75	0	2	0	0	30	15	0	0	0	0	10	22	28	17	0	0
2195	1-Jan-22	4:50:00	1	0	1	0	CT	0	1	0	0	8	0	0	18	0	0	0	0	0	0	0	0	0	14	0	33	0	0	43	24	0	0	0	0	8	21	0	20	22	0
2196	1-Jan-22	4:55:00	1	0	1	0	CT	0	1	1	16	7	10	0	26	0	0	0	0	0	0	2	1	0	46	0	15	0	0	3	2	0	0	18	0	0	13	0	26	25	0
2197	1-Jan-22	5:00:00	1	0	1	0	CT	0	1	2	0	22	2	0	3	0	0	1	0	0	0	0	2	0	17	0	14	20	0	0	6	0	0	0	3	29	22	0	4	0	0
2198	1-Jan-22	5:05:00	1	0	1	0	CT	0	1	0	23	20	1	1	3	0	0	0	7	0	27	3	1	0	25	0	1	0	0	17	3	0	0	0	8	52	14	0	27	1	0
2199	1-Jan-22	5:10:00	1	0	1	0	CT	0	1	0	0	5	0	0	11	0	0	0	0	0	0	0	4	0	0	0	3	0	0	31	4	0	0	0	54	36	22	0	9	0	0
2200	1-Jan-22	5:15:00	1	0	1	0	CT	0	1	0	0	5	0	0	8	3	33	0	0	0	0	69	0	0	3	0	54	0	0	43	0	0	1	5	7	16	5	2	0	0	44
2201	1-Jan-22	5:20:00	1	0	1	0	CT	0	1	0	0	0	0	1	4	0	45	0	0	5	0	37	38	0	28	0	12	0	0	15	0	0	0	4	15	18	10	64	0	0	0
2202	1-Jan-22	5:25:00	1	0	1	0	CT	0	1	0	0	0	21	3	10	0	0	0	0	2	0	53	74	0	46	0	14	0	0	16	0	0	15	0	19	3	40	37	0	0	26
2203	1-Jan-22	5:30:00	1	0	1	0	CT	0	1	0	0	4	28	0	2	0	0	6	0	6	0	40	42	0	19	0	0	0	0	8	0	0	2	24	10	8	23	10	0	11	34
2204	1-Jan-22	5:35:00	1	0	1	0	CT	0	1	0	0	14	14	0	0	0	0	64	0	0	0	2	55	0	14	0	0	0	0	11	0	0	0	77	14	20	9	55	0	0	30
2205	1-Jan-22	5:40:00	1	0	1	0	CT	0	1	0	0	22	48	0	6	0	0	90	0	0	0	0	38	0	16	0	0	11	0	8	0	0	0	44	15	4	31	61	0	0	8
2206	1-Jan-22	5:45:00	1	0	1	0	CT	0	1	0	10	4	0	6	26	0	0	0	0	0	0	0	12	0	10	0	0	46	0	0	12	0	0	7	11	6	7	103	0	0	21
2207	1-Jan-22	5:50:00	1	0	1	0	CT	0	1	0	0	34	0	50	39	0	0	0	0	0	52	0	31	0	14	0	42	58	0	14	11	0	0	3	0	1	7	6	0	0	0
2208	1-Jan-22	5:55:00	1	0	1	0	CT	0	1	0	0	1	25	59	36	0	0	0	5	0	0	0	29	0	5	0	23	19	0	25	0	0	0	19	15	0	17	14	0	0	36
2209	1-Jan-22	6:00:00	1	0	1	0	CT	0	1	0	0	1	39	17	23	0	9	0	0	0	0	0	23	0	3	0	16	30	0	84	0	0	52	16	5	0	17	50	9	0	10
2210	1-Jan-22	6:05:00	1	0	1	0	CT	0	1	0	0	1	39	6	31	0	32	0	0	0	0	0	16	0	13	0	21	27	0	26	0	0	1	0	16	0	12	28	10	4	20
2211	1-Jan-22	6:10:00	1	0	1	0	CT	0	1	0	0	12	0	12	32	1	18	0	0	9	0	0	6	0	30	0	50	19	0	22	0	0	0	30	13	0	4	0	37	0	31
2212	1-Jan-22	6:15:00	1	0	1	0	CT	0	1	0	0	42	22	0	24	35	0	0	0	7	11	0	1	0	34	0	28	19	0	11	0	0	0	74	0	0	24	0	33	1	18
2213	1-Jan-22	6:20:00	1	0	1	0	CT	0	1	0	0	53	19	0	18	63	0	0	2	31	67	0	0	0	32	0	9	14	0	8	0	0	0	16	0	0	7	0	25	9	40
2214	1-Jan-22	6:25:00	1	0	1	0	CT	0	1	0	0	62	0	0	26	4	0	0	0	44	7	0	0	0	32	0	21	67	9	1	0	0	0	37	3	0	0	10	55	38	56
2215	1-Jan-22	6:30:00	1	0	1	0	CT	0	1	0	0	29	0	0	8	5	0	0	1	27	1	4	0	0	22	0	31	37	79	15	0	0	0	36	12	0	0	3	39	20	5
2216	1-Jan-22	6:35:00	1	0	1	0	CT	0	1	0	0	29	4	0	0	5	0	0	0	0	0	42	0	0	17	0	1	73	37	4	3	0	0	17	5	0	6	8	20	41	1
2217	1-Jan-22	6:40:00	1	0	1	0	CT	0	1	0	0	27	42	0	4	30	0	0	0	0	0	23	0	0	41	0	3	4	42	5	3	0	0	28	0	21	50	16	10	32	11
2218	1-Jan-22	6:45:00	1	0	1	0	CT	0	1	0	0	41	9	0	25	3	0	10	0	0	0	26	0	0	1	0	0	0	4	13	0	0	0	67	34	65	22	39	6	21	0
2219	1-Jan-22	6:50:00	1	0	1	0	CT	0	1	2	0	16	0	0	3	21	0	94	0	0	0	30	1	0	1	0	0	0	1	67	0	0	25	37	6	37	4	13	0	20	0
2220	1-Jan-22	6:55:00	1	0	1	0	CT	0	1	49	0	18	4	0	4	26	0	3	0	0	0	50	3	0	10	0	0	0	2	76	0	0	5	2	3	41	22	39	0	10	14
2221	1-Jan-22	7:00:00	1	0	1	0	CT	0	1	46	0	39	0	0	5	16	0	4	0	0	0	30	23	0	37	0	0	0	0	61	9	0	57	33	24	18	6	5	0	7	49
2222	1-Jan-22	7:05:00	1	0	1	0	CT	0	1	18	0	63	0	0	5	16	0	0	0	0	23	0	49	0	11	0	0	0	0	52	63	0	26	5	27	48	45	7	0	0	1
2223	1-Jan-22	7:10:00	1	0	1	0	CT	0	1	14	0	47	10	0	9	8	0	0	0	0	21	0	35	0	22	0	0	0	0	77	63	0	2	0	9	33	16	1	0	4	6
2224	1-Jan-22	7:15:00	1	0	1	0	CT	0	1	13	0	63	5	2	20	27	0	0	0	0	0	0	43	0	0	0	8	0	0	19	17	0	0	0	14	23	77	0	0	54	0
2225	1-Jan-22	7:20:00	1	0	1	0	CT	0	1	0	0	76	1	0	16	30	0	0	0	0	0	0	52	0	0	0	11	0	0	20	6	0	0	7	14	8	12	0	0	26	0
2226	1-Jan-22	7:25:00	1	0	1	0	CT	0	1	1	0	35	5	0	9	27	0	0	3	0	0	0	46	0	0	0	45	0	5	40	5	0	0	0	11	17	37	0	0	13	0
2227	1-Jan-22	7:30:00	1	0	1	0	CT	0	1	8	0	48	42	0	15	7	0	0	0	7	0	0	39	0	2	0	18	0	29	8	0	0	0	0	4	68	22	0	0	0	0
2228	1-Jan-22	7:35:00	1	0	1	0	CT	0	1	7	0	37	22	0	17	31	5	0	0	3	0	0	22	0	0	0	16	0	29	5	0	0	0	0	18	57	13	0	6	0	0
2229	1-Jan-22	7:40:00	1	0	1	0	CT	0	1	11	18	48	0	5	8	14	16	0	0	0	63	0	57	0	0	0	27	22	28	29	0	0	0	0	19	17	73	0	4	0	0
2230	1-Jan-22	7:45:00	1	0	1	0	CT	0	1	0	76	44	0	25	21	13	14	0	0	0	1	0	12	0	3	0	5	17	16	35	0	0	0	41	14	14	8	12	0	0	11
2231	1-Jan-22	7:50:00	1	0	1	0	CT	0	1	0	7	32	2	38	17	4	42	8	13	0	0	8	37	0	0	0	0	31	16	22	14	0	21	23	9	3	33	8	0	0	36
2232	1-Jan-22	7:55:00	1	0	1	0	CT	0	1	0	23	20	0	0	39	22	59	0	50	0	0	45	48	0	0	0	10	25	11	17	22	0	0	93	27	0	9	6	0	0	3
2233	1-Jan-22	8:00:00	1	0	1	0	CT	0	1	0	0	0	1	0	29	34	43	0	40	0	1	9	16	0	0	0	65	54	18	27	27	0	0	59	28	0	16	34	0	2	0
2234	1-Jan-22	8:05:00	1	0	1	0	CT	0	0	0	7	0	8	0	0	0	5	0	3	0	0	9	0	0	0	0	0	4	5	5	9	0	42	14	0	0	0	0	0	11	0
2235	1-Jan-22	8:10:00	1	0	1	0	CT	0	0	0	0	0	0	0	0	0	0	0	0	3	6	0	0	0	0	0	2	0	0	0	41	0	0	7	0	0	0	0	0	0	0
2236	1-Jan-22	8:15:00	1	0	1	0	CT	0	0	7	12	0	0	12	0	0	0	0	3	0	0	0	0	0	0	0	0	0	0	0	49	0	0	45	0	0	0	0	0	0	0
2237	1-Jan-22	8:20:00	1	0	1	0	CT	0	0	41	4	0	1	91	0	0	0	28	0	15	0	0	0	0	0	0	0	0	0	0	0	0	0	0	0	0	0	11	0	0	11
2238	1-Jan-22	8:25:00	1	0	1	0	CT	0	0	50	32	0	0	31	0	2	0	18	0	8	0	0	0	0	0	0	51	0	0	0	0	0	0	0	0	0	0	4	0	0	1
2239	1-Jan-22	8:30:00	1	0	1	0	CT	0	0	0	6	0	12	35	0	0	0	0	0	0	0	1	0	0	0	0	0	39	0	0	4	0	0	24	0	0	0	0	0	0	1
2240	1-Jan-22	8:35:00	1	0	1	0	CT	0	0	0	29	0	0	13	0	0	13	0	0	0	0	0	0	0	0	0	2	0	0	0	2	0	0	70	0	0	0	0	0	0	6
2241	1-Jan-22	8:40:00	1	0	1	0	CT	0	0	3	35	5	0	69	0	63	0	7	19	0	0	0	0	0	0	0	0	0	0	1	31	0	0	40	0	4	0	0	0	3	0
2242	1-Jan-22	8:45:00	1	0	1	0	CT	0	0	0	63	0	0	50	0	49	0	6	0	1	0	0	0	0	0	0	0	0	0	23	64	0	0	0	0	0	0	0	9	0	0
2243	1-Jan-22	8:50:00	1	0	1	0	CT	0	0	0	33	0	0	29	0	57	0	0	0	52	0	0	0	0	0	0	5	0	0	12	67	0	0	0	0	0	0	30	0	0	9
2244	1-Jan-22	8:55:00	1	0	1	0	CT	0	0	7	26	0	0	28	0	0	0	0	0	15	0	0	0	0	0	0	19	0	16	1	10	0	0	0	0	0	0	72	0	0	2
2245	1-Jan-22	9:00:00	1	0	1	0	CT	0	0	16	0	14	0	35	0	2	0	0	18	0	0	4	0	0	0	0	5	0	8	6	0	0	0	0	0	0	0	68	0	0	3
2246	1-Jan-22	9:05:00	1	0	1	0	CT	0	0	2	0	0	0	0	0	1	0	0	7	0	0	5	0	0	0	0	1	0	0	2	0	0	0	0	0	0	0	14	0	0	15
2247	1-Jan-22	9:10:00	1	0	1	0	CT	0	0	1	0	3	0	0	0	1	0	0	2	0	0	0	0	0	0	0	0	0	0	15	0	0	0	0	0	0	0	5	0	0	1
2248	1-Jan-22	9:15:00	1	0	1	0	CT	0	0	0	0	0	0	0	0	2	0	0	5	0	0	0	0	0	0	0	26	0	0	0	0	0	0	11	0	0	0	16	0	0	23
2249	1-Jan-22	9:20:00	1	0	1	0	CT	0	0	2	0	14	40	0	0	0	0	0	11	0	17	0	0	0	0	0	51	1	0	1	0	0	0	62	0	0	0	9	0	0	17
2250	1-Jan-22	9:25:00	1	0	1	0	CT	0	0	2	0	50	79	0	0	3	0	12	44	0	51	0	0	0	0	0	25	0	0	0	9	0	0	81	0	24	0	6	0	0	0
2251	1-Jan-22	9:30:00	1	0	1	0	CT	0	0	0	0	13	2	0	0	5	12	67	52	0	61	0	0	0	0	0	21	0	0	1	48	0	0	21	0	1	0	2	0	0	0
2252	1-Jan-22	9:35:00	1	0	1	0	CT	0	0	4	0	14	21	47	0	0	2	9	4	4	12	0	0	0	0	0	0	4	0	1	12	0	0	0	0	0	0	6	0	0	0
2253	1-Jan-22	9:40:00	1	0	1	0	CT	0	0	21	0	0	0	47	0	0	15	0	0	0	13	0	0	0	0	0	0	42	0	3	0	0	0	29	0	7	0	0	0	0	0
2254	1-Jan-22	9:45:00	1	0	1	0	CT	0	0	64	41	0	0	22	0	0	45	1	0	0	24	1	0	0	0	0	0	22	0	63	0	0	0	0	0	7	0	0	0	0	0
2255	1-Jan-22	9:50:00	1	0	1	0	CT	0	0	0	0	0	0	64	0	0	16	0	0	0	39	0	0	0	0	0	0	25	0	44	0	0	0	0	0	28	0	10	0	0	1
2256	1-Jan-22	9:55:00	1	0	1	0	CT	0	0	0	0	0	0	18	0	0	2	0	0	0	25	0	0	0	0	0	0	66	0	0	54	0	0	0	0	0	0	26	0	0	1
2257	1-Jan-22	10:00:00	1	0	1	0	CT	0	0	0	0	0	0	2	0	0	0	0	0	0	0	0	0	0	3	0	0	53	0	5	55	0	0	0	0	0	0	0	36	17	5
2258	1-Jan-22	10:05:00	1	0	1	0	CT	0	0	0	8	0	0	0	0	0	0	0	1	0	8	0	0	0	20	0	3	37	0	17	1	0	0	0	0	0	0	0	5	0	0
2259	1-Jan-22	10:10:00	1	0	1	0	CT	0	0	32	4	0	0	0	0	0	0	0	0	0	39	0	0	0	0	0	0	31	0	0	0	0	0	5	0	0	0	0	18	0	41
2260	1-Jan-22	10:15:00	1	0	1	0	CT	0	0	0	1	0	0	0	0	0	0	0	1	0	6	0	0	0	0	0	4	32	0	0	0	0	0	43	0	0	0	0	0	0	0
2261	1-Jan-22	10:20:00	1	0	1	0	CT	0	0	0	3	0	4	0	0	0	17	0	0	0	0	0	0	0	52	0	0	0	0	0	0	0	0	91	0	3	0	0	0	0	0
2262	1-Jan-22	10:25:00	1	0	1	0	CT	0	0	0	0	0	0	0	0	4	22	0	0	0	0	0	0	0	0	0	0	0	0	1	0	0	5	67	63	1	0	9	0	0	0
2263	1-Jan-22	10:30:00	1	0	1	0	CT	0	0	0	0	0	0	0	0	45	0	0	1	0	0	0	0	0	0	0	0	0	0	2	4	0	3	46	35	0	0	1	11	4	4
2264	1-Jan-22	10:35:00	1	0	1	0	CT	0	0	0	0	0	0	40	0	68	15	0	0	2	26	0	0	0	0	0	0	0	0	7	0	0	4	39	8	0	0	6	3	31	0
2265	1-Jan-22	10:40:00	1	0	1	0	CT	0	0	0	2	0	0	25	0	11	14	0	6	0	5	9	0	0	0	0	0	0	0	0	15	0	0	63	3	0	0	11	42	10	0
2266	1-Jan-22	10:45:00	1	0	1	0	CT	0	0	0	55	41	0	0	0	6	4	9	0	0	0	0	0	0	6	0	6	5	0	5	0	0	0	0	2	1	0	0	23	0	5
2267	1-Jan-22	10:50:00	1	0	1	0	CT	0	0	0	15	44	0	0	0	0	0	63	0	0	0	0	0	0	43	0	2	1	0	2	41	0	0	0	0	0	0	0	3	6	0
2268	1-Jan-22	10:55:00	1	0	1	0	CT	0	0	0	7	50	0	35	0	0	0	38	0	0	0	0	0	0	65	0	2	0	0	8	52	0	0	0	0	0	1	1	0	13	0
2269	1-Jan-22	11:00:00	1	0	1	0	CT	0	0	10	41	35	1	39	0	0	0	0	1	12	0	1	0	0	25	0	0	0	0	25	46	0	0	4	0	0	0	3	14	0	0
2270	1-Jan-22	11:05:00	1	0	1	0	CT	0	0	0	11	75	1	31	0	0	0	0	0	12	0	6	0	0	6	0	3	0	1	0	0	0	2	52	1	1	0	30	29	0	8
2271	1-Jan-22	11:10:00	1	0	1	0	CT	0	0	30	22	47	2	35	0	12	1	0	0	6	0	14	0	0	1	0	59	0	26	6	0	0	35	1	3	1	0	80	1	0	0
2272	1-Jan-22	11:15:00	1	0	1	0	CT	0	0	31	0	26	0	0	0	11	1	0	0	0	0	39	0	0	4	0	46	1	30	0	2	0	45	3	0	0	0	1	0	0	0
2273	1-Jan-22	11:20:00	1	0	1	0	CT	0	0	22	0	47	0	0	0	0	0	0	0	1	0	33	0	0	1	0	62	1	24	0	5	0	67	32	4	0	0	55	1	0	10
2274	1-Jan-22	11:25:00	1	0	1	0	CT	0	0	63	0	40	0	0	0	1	1	0	0	33	0	50	0	0	1	0	52	1	72	12	3	0	12	64	0	4	26	52	1	6	0
2275	1-Jan-22	11:30:00	1	0	1	0	CT	0	0	1	0	19	0	0	0	0	0	0	0	0	13	40	0	0	0	0	19	0	17	31	21	0	53	38	32	0	3	28	0	0	0
2276	1-Jan-22	11:35:00	1	0	1	0	CT	0	0	3	0	45	14	0	0	0	2	0	0	1	65	36	11	0	2	0	24	8	2	64	10	0	2	17	70	6	0	0	11	0	0
2277	1-Jan-22	11:40:00	1	0	1	0	CT	0	0	0	0	79	0	0	0	2	0	0	63	0	82	39	0	0	0	0	0	44	2	92	28	0	0	2	0	17	2	3	0	0	9
2278	1-Jan-22	11:45:00	1	0	1	0	CT	0	0	0	0	46	0	0	0	4	45	0	1	0	8	35	0	0	20	0	0	63	0	37	10	0	0	3	0	10	36	10	35	10	0
2279	1-Jan-22	11:50:00	1	0	1	0	CT	0	0	0	0	24	0	0	0	63	15	0	0	2	0	18	14	0	13	0	0	27	0	69	8	0	0	0	0	0	0	71	23	16	32
2280	1-Jan-22	11:55:00	1	0	1	0	CT	0	0	20	0	25	0	25	0	31	69	0	0	9	0	53	15	0	1	0	0	34	10	28	32	0	1	32	0	0	0	58	0	0	5
2281	1-Jan-22	12:00:00	1	0	1	0	CT	0	0	0	0	1	0	0	0	48	12	0	0	2	0	40	44	0	0	0	0	54	3	0	48	0	1	7	0	0	0	50	0	5	11
2282	1-Jan-22	12:05:00	1	0	1	0	CT	0	0	4	24	34	0	0	0	76	0	9	0	0	0	31	0	0	0	0	7	34	1	0	49	0	0	20	0	0	0	0	0	0	25
2283	1-Jan-22	12:10:00	1	0	1	0	CT	0	0	0	44	49	0	0	0	41	0	35	9	0	0	57	0	0	0	0	31	21	3	0	64	0	2	1	0	0	0	6	0	1	8
2284	1-Jan-22	12:15:00	1	0	1	0	CT	0	0	0	53	12	0	0	0	27	0	0	33	0	0	57	0	0	1	0	53	32	5	0	0	0	0	8	0	0	0	26	0	0	0
2285	1-Jan-22	12:20:00	1	0	1	0	CT	0	0	2	49	47	0	0	0	15	19	0	43	0	0	36	0	0	0	0	56	17	3	0	6	0	1	2	0	1	0	47	0	0	2
2286	1-Jan-22	12:25:00	1	0	1	0	CT	0	0	10	11	46	0	0	0	0	22	0	9	0	0	16	0	0	0	0	16	70	2	0	7	0	4	0	0	1	0	67	0	1	2
2287	1-Jan-22	12:30:00	1	0	1	0	CT	0	0	15	14	33	0	6	0	6	26	0	15	0	0	38	8	0	0	0	12	20	11	21	0	0	0	0	0	22	0	0	0	0	0
2288	1-Jan-22	12:35:00	1	0	1	0	CT	0	0	0	0	14	0	52	0	5	35	0	14	0	0	27	4	0	0	0	20	0	1	50	0	0	0	0	0	42	18	6	0	0	3
2289	1-Jan-22	12:40:00	1	0	1	0	CT	0	0	0	0	0	0	28	18	3	21	0	39	0	0	44	0	0	0	0	0	0	0	1	0	0	48	31	0	22	28	46	0	0	0
2290	1-Jan-22	12:45:00	1	0	1	0	CT	0	0	0	0	0	0	20	25	0	0	0	4	0	0	34	0	0	42	0	0	0	1	57	0	0	8	87	0	7	31	34	0	0	4
2291	1-Jan-22	12:50:00	1	0	1	0	CT	0	0	0	0	0	0	9	17	0	0	58	37	3	0	38	0	0	26	0	0	0	0	4	0	0	0	26	0	0	21	59	0	0	0
2292	1-Jan-22	12:55:00	1	0	1	0	CT	0	0	0	0	0	0	0	15	0	0	3	28	1	0	26	0	0	41	0	0	3	1	0	0	0	0	0	0	0	1	18	38	0	0
2293	1-Jan-22	13:00:00	1	0	1	0	CT	0	0	32	0	0	13	0	29	0	13	0	28	0	0	3	0	0	41	0	0	0	43	0	0	0	0	0	0	0	1	8	46	18	0
2294	1-Jan-22	13:05:00	1	0	1	0	CT	0	0	39	0	0	36	0	44	0	2	0	5	5	0	0	0	0	49	0	0	0	4	0	16	0	0	12	0	2	25	7	29	31	0
2295	1-Jan-22	13:10:00	1	0	1	0	CT	0	0	0	0	0	0	8	1	0	1	0	3	0	0	0	0	0	8	0	0	0	3	28	29	0	0	2	0	12	0	20	10	3	0
2296	1-Jan-22	13:15:00	1	0	1	0	CT	0	0	0	18	5	0	32	2	0	0	0	0	0	1	0	0	0	25	0	2	0	0	6	0	0	0	2	0	0	0	14	7	8	3
2297	1-Jan-22	13:20:00	1	0	1	0	CT	0	0	33	6	0	18	4	0	0	10	0	0	18	30	0	0	0	42	0	3	0	0	14	0	0	0	2	0	0	0	7	1	4	10
2298	1-Jan-22	13:25:00	1	0	1	0	CT	0	0	0	7	0	10	0	0	0	0	0	0	3	49	0	0	0	41	0	24	18	2	64	0	0	0	1	6	0	0	19	0	0	0
2299	1-Jan-22	13:30:00	1	0	1	0	CT	0	0	0	19	0	42	0	0	0	0	50	0	16	63	0	13	0	45	0	9	37	57	63	0	0	0	0	0	0	0	76	1	0	0
2300	1-Jan-22	13:35:00	1	0	1	0	CT	0	0	0	34	6	17	0	28	0	0	0	0	0	21	0	38	0	64	0	55	54	20	3	0	0	0	1	0	0	0	43	0	0	9
2301	1-Jan-22	13:40:00	1	0	1	0	CT	0	0	0	8	62	0	28	15	0	0	0	0	0	42	0	0	0	72	0	35	40	26	0	0	0	0	6	0	0	0	39	0	0	0
2302	1-Jan-22	13:45:00	1	0	1	0	CT	0	0	0	26	76	0	32	26	0	0	0	0	0	29	0	34	0	49	0	5	64	25	0	0	0	0	0	8	1	0	15	0	0	0
2303	1-Jan-22	13:50:00	1	0	1	0	CT	0	0	0	40	26	45	27	12	0	0	0	0	0	1	0	50	0	49	0	63	28	8	0	0	0	0	1	37	2	0	9	2	21	0
2304	1-Jan-22	13:55:00	1	0	1	0	CT	0	0	0	46	14	16	1	0	12	2	0	0	0	0	0	57	0	18	0	56	53	0	0	40	0	84	2	6	0	0	45	0	0	6
2305	1-Jan-22	14:00:00	1	0	1	0	CT	0	0	0	0	4	5	0	0	14	1	0	0	0	0	0	13	0	31	0	7	2	0	0	69	0	55	3	0	0	0	18	0	0	0
2306	1-Jan-22	14:05:00	1	0	1	0	CT	0	0	4	0	2	3	11	0	34	2	39	0	0	0	0	9	0	0	0	0	0	0	0	60	0	64	0	0	0	19	3	0	0	0
2307	1-Jan-22	14:10:00	1	0	1	0	CT	0	0	32	0	1	28	33	0	35	7	6	7	0	1	0	0	0	0	0	0	0	0	0	33	0	63	0	0	0	19	0	1	0	0
2308	1-Jan-22	14:15:00	1	0	1	0	CT	0	0	45	0	47	18	29	0	8	26	14	63	0	3	0	0	0	0	0	0	0	0	2	6	0	7	0	0	0	64	0	0	0	0
2309	1-Jan-22	14:20:00	1	0	1	0	CT	0	0	11	0	21	30	17	0	13	50	0	3	0	0	21	0	0	5	0	0	0	0	34	46	0	4	78	41	0	33	0	0	0	0
2310	1-Jan-22	14:25:00	1	0	1	0	CT	0	0	20	0	0	8	88	0	18	19	1	16	2	0	7	0	0	7	0	0	0	0	3	35	0	0	68	3	0	17	0	1	0	0
2311	1-Jan-22	14:30:00	1	0	1	0	CT	0	0	0	0	42	0	51	0	0	1	1	34	3	0	26	0	0	0	0	0	0	0	3	0	0	0	34	2	0	20	36	4	0	1
2312	1-Jan-22	14:35:00	1	0	1	0	CT	0	0	24	0	55	2	61	0	0	0	0	37	11	0	30	0	0	15	0	37	14	0	5	0	0	4	0	0	0	34	49	4	0	0
2313	1-Jan-22	14:40:00	1	0	1	0	CT	0	0	0	0	29	3	30	16	0	0	1	31	11	0	47	0	0	9	0	65	47	0	27	0	0	0	0	2	0	12	9	8	0	26
2314	1-Jan-22	14:45:00	1	0	1	0	CT	0	0	0	0	0	4	31	15	0	2	29	34	0	0	38	0	0	1	0	34	49	0	27	18	0	0	0	15	0	1	0	15	1	0
2315	1-Jan-22	14:50:00	1	0	1	0	CT	0	0	0	0	13	0	50	35	0	31	0	37	2	21	51	0	0	1	0	3	0	0	43	28	0	26	0	0	29	35	48	28	3	0
2316	1-Jan-22	14:55:00	1	0	1	0	CT	0	0	1	0	47	0	57	39	0	23	0	25	5	28	38	2	0	3	0	0	0	0	2	38	0	7	0	0	39	4	63	25	8	0
2317	1-Jan-22	15:00:00	1	0	1	0	CT	0	0	0	0	40	0	24	36	12	37	0	17	4	24	13	1	0	0	0	0	0	0	1	44	0	28	18	2	0	0	49	7	0	0
2318	1-Jan-22	15:05:00	1	0	1	0	CT	0	0	0	0	51	0	1	0	0	43	21	4	0	1	21	0	0	0	0	0	0	0	0	50	0	2	24	0	19	0	22	9	9	0
2319	1-Jan-22	15:10:00	1	0	1	0	CT	0	0	4	0	23	63	6	0	4	10	16	0	0	0	37	7	0	3	0	0	0	0	5	17	0	30	80	18	42	0	11	0	4	0
2320	1-Jan-22	15:15:00	1	0	1	0	CT	0	0	0	15	50	11	0	1	0	46	0	1	6	0	30	17	0	38	0	0	0	0	0	27	0	48	47	0	19	0	4	0	1	0
2321	1-Jan-22	15:20:00	1	0	1	0	CT	0	0	1	0	20	0	0	25	16	29	9	0	0	8	43	31	0	12	0	0	16	0	0	7	0	63	64	14	0	0	28	10	0	0
2322	1-Jan-22	15:25:00	1	0	1	0	CT	0	0	0	0	33	0	0	1	48	51	60	2	0	0	45	22	0	0	0	0	0	0	0	2	0	16	17	0	13	53	64	0	0	0
2323	1-Jan-22	15:30:00	1	0	1	0	CT	0	0	0	0	32	0	1	31	29	35	22	3	0	0	38	0	0	0	0	0	1	0	0	4	0	0	36	0	0	14	76	0	6	0
2324	1-Jan-22	15:35:00	1	0	1	0	CT	0	0	0	16	78	10	0	21	1	0	1	0	0	0	4	0	0	0	0	0	9	0	10	2	0	0	29	6	3	63	4	1	3	15
2325	1-Jan-22	15:40:00	1	0	1	0	CT	0	0	0	12	21	11	1	46	73	6	0	0	11	2	0	0	0	0	0	39	0	7	17	35	0	0	13	17	86	0	21	17	39	0
2326	1-Jan-22	15:45:00	1	0	1	0	CT	0	0	0	0	41	9	10	14	27	0	0	25	0	0	0	0	0	0	0	36	0	8	38	29	0	0	5	0	33	0	25	52	15	0
2327	1-Jan-22	15:50:00	1	0	1	0	CT	0	0	19	0	27	0	64	0	0	0	0	5	0	0	0	0	0	0	0	32	1	21	42	44	0	0	67	0	3	0	0	7	30	0
2328	1-Jan-22	15:55:00	1	0	1	0	CT	0	0	31	0	31	0	45	0	4	0	0	0	0	1	23	0	0	3	0	29	36	3	0	19	0	0	63	12	1	9	47	0	17	1
2329	1-Jan-22	16:00:00	1	0	1	0	CT	0	1	78	0	36	0	1	27	5	0	3	0	1	0	20	0	0	0	0	3	3	2	0	58	0	0	11	18	0	5	34	0	32	13
2330	1-Jan-22	16:05:00	1	0	1	0	CT	0	1	61	27	46	49	80	48	35	42	50	25	36	0	51	45	0	49	0	62	27	59	67	40	0	0	88	89	56	48	0	0	47	35
2331	1-Jan-22	16:10:00	1	0	1	0	CT	0	1	56	26	58	53	75	43	70	28	50	29	45	26	74	29	0	33	0	51	34	15	97	54	0	20	69	86	65	28	0	13	49	9
2332	1-Jan-22	16:15:00	1	0	1	0	CT	0	1	47	7	62	55	54	55	64	47	86	39	30	15	34	64	0	65	0	33	40	12	71	40	0	21	69	78	36	24	0	69	59	0
2333	1-Jan-22	16:20:00	1	0	1	0	CT	0	1	0	18	44	53	11	28	65	41	45	11	60	78	30	13	0	5	0	42	47	17	66	39	0	63	21	91	75	56	0	0	42	0
2334	1-Jan-22	16:25:00	1	0	1	0	CT	0	1	0	26	43	25	11	23	19	47	81	34	30	63	60	119	0	48	0	39	13	30	52	23	0	60	75	17	76	30	0	0	9	0
2335	1-Jan-22	16:30:00	1	0	1	0	CT	0	1	0	43	45	13	5	46	49	46	47	50	60	26	3	40	0	0	0	18	64	74	71	15	0	31	21	32	71	10	0	1	88	0
2336	1-Jan-22	16:35:00	1	0	1	0	CT	0	1	0	11	49	9	0	28	0	22	0	46	56	50	0	46	0	0	0	68	57	50	62	11	0	12	45	27	58	53	20	0	27	27
2337	1-Jan-22	16:40:00	1	0	1	0	CT	0	1	0	34	42	22	0	15	65	35	32	0	38	19	32	28	0	10	0	6	38	8	29	0	0	75	44	42	50	44	0	0	14	7
2338	1-Jan-22	16:45:00	1	0	1	0	CT	0	1	0	11	27	28	0	26	22	29	15	16	36	0	56	37	0	18	0	27	63	29	55	0	0	11	18	49	47	4	55	0	19	0
2339	1-Jan-22	16:50:00	1	0	1	0	CT	0	1	0	12	39	20	2	15	41	45	2	23	32	2	22	35	0	59	0	61	44	19	45	0	0	27	53	63	17	8	58	0	0	0
2340	1-Jan-22	16:55:00	1	0	1	0	CT	0	1	0	31	33	30	0	31	26	45	0	54	9	0	61	57	0	62	0	29	61	31	54	42	0	0	33	91	65	7	13	26	20	0
2341	1-Jan-22	17:00:00	1	0	1	0	CT	0	1	28	3	14	26	0	10	50	75	0	32	0	0	16	23	0	0	0	25	0	18	41	1	0	0	69	44	44	26	0	6	15	27
2342	1-Jan-22	17:05:00	1	0	1	0	CT	0	1	78	19	60	0	0	4	11	14	0	18	15	0	0	22	0	0	0	19	1	4	51	56	0	0	58	49	38	16	30	39	25	6
2343	1-Jan-22	17:10:00	1	0	1	0	CT	0	1	63	0	38	18	0	31	4	16	5	17	37	0	0	34	0	20	0	28	2	18	19	16	0	0	62	29	45	16	7	30	13	0
2344	1-Jan-22	17:15:00	1	0	1	0	CT	0	1	0	0	57	24	0	50	63	33	11	3	30	0	33	30	0	0	0	67	0	22	57	59	0	0	48	33	72	5	12	38	14	0
2345	1-Jan-22	17:20:00	1	0	1	0	CT	0	1	33	18	1	30	0	5	0	4	3	0	33	0	45	54	0	1	0	41	0	5	23	0	0	0	46	8	44	47	0	1	38	0
2346	1-Jan-22	17:25:00	1	0	1	0	CT	0	1	0	22	39	13	7	22	60	0	56	0	46	0	20	55	0	48	0	8	0	33	82	15	0	0	63	10	31	24	0	0	27	0
2347	1-Jan-22	17:30:00	1	0	1	0	CT	0	1	2	0	12	15	62	12	3	2	34	0	31	0	15	47	0	28	0	29	2	21	19	54	0	0	60	49	27	26	0	0	34	0
2348	1-Jan-22	17:35:00	1	0	1	0	CT	0	1	1	16	3	27	40	44	57	32	9	0	15	8	49	15	0	36	0	39	0	20	20	64	0	74	46	107	29	19	0	0	21	0
2349	1-Jan-22	17:40:00	1	0	1	0	CT	0	1	0	3	0	32	0	39	35	20	0	0	41	38	20	45	0	36	0	38	30	39	28	0	0	16	10	46	13	27	0	0	41	0
2350	1-Jan-22	17:45:00	1	0	1	0	CT	0	1	0	17	4	15	0	25	22	31	0	0	21	0	19	38	0	63	0	39	48	22	41	0	0	44	7	65	15	18	0	0	42	0
2351	1-Jan-22	17:50:00	1	0	1	0	CT	0	1	0	28	15	3	0	20	32	39	0	4	12	0	2	25	0	0	0	42	9	12	16	13	0	53	7	17	27	19	0	0	0	0
2352	1-Jan-22	17:55:00	1	0	1	0	CT	0	1	0	35	41	12	0	16	41	18	0	48	3	0	53	35	0	0	0	30	0	20	86	3	0	1	0	45	39	24	0	0	16	0
2353	1-Jan-22	18:00:00	1	0	1	0	CT	0	1	0	33	46	8	0	8	14	31	0	55	0	0	47	41	0	0	0	15	0	32	76	0	0	0	0	7	54	1	0	0	2	17
2354	1-Jan-22	18:05:00	1	0	1	0	CT	0	1	0	0	53	73	0	0	6	51	0	37	0	11	42	27	0	0	0	45	0	12	44	0	0	2	0	3	31	20	0	17	38	0
2355	1-Jan-22	18:10:00	1	0	1	0	CT	0	1	2	26	51	1	0	10	26	16	0	28	0	46	30	44	0	1	0	1	0	33	56	1	0	40	0	5	1	22	0	35	3	4
2356	1-Jan-22	18:15:00	1	0	1	0	CT	0	1	0	29	45	7	0	24	16	54	5	24	0	15	1	33	0	73	0	15	4	20	34	0	0	18	0	26	1	34	11	0	0	0
2357	1-Jan-22	18:20:00	1	0	1	0	CT	0	1	0	3	52	24	0	11	34	32	11	20	0	0	33	24	0	16	0	68	40	28	15	0	0	2	0	10	5	29	52	0	0	0
2358	1-Jan-22	18:25:00	1	0	1	0	CT	0	1	8	0	72	24	0	21	36	20	23	29	0	0	45	16	0	47	0	71	62	9	34	0	0	1	0	32	20	45	69	0	0	0
2359	1-Jan-22	18:30:00	1	0	1	0	CT	0	1	39	0	31	3	0	24	34	0	45	26	0	0	25	36	0	8	0	10	42	13	24	0	0	3	0	30	26	16	36	3	0	0
2360	1-Jan-22	18:35:00	1	0	1	0	CT	0	1	0	0	42	0	0	25	57	0	49	63	0	0	23	44	0	0	0	26	73	23	50	0	0	2	0	69	32	29	10	0	0	0
2361	1-Jan-22	18:40:00	1	0	1	0	CT	0	1	0	0	43	3	12	12	32	0	8	21	0	0	10	36	0	2	0	1	53	24	32	0	0	0	8	30	45	15	0	0	0	0
2362	1-Jan-22	18:45:00	1	0	1	0	CT	0	1	0	0	55	42	63	9	16	0	0	16	0	0	40	26	0	25	0	42	13	20	16	0	0	0	0	7	31	38	0	0	3	0
2363	1-Jan-22	18:50:00	1	0	1	0	CT	0	1	0	0	30	32	22	15	30	0	0	32	30	0	5	19	0	22	0	23	94	37	15	0	0	0	19	1	14	39	50	19	18	0
2364	1-Jan-22	18:55:00	1	0	1	0	CT	0	1	0	0	17	20	0	30	4	0	0	26	11	32	34	25	0	34	0	2	8	36	31	0	0	18	6	9	12	14	0	18	13	8
2365	1-Jan-22	19:00:00	1	0	1	0	CT	0	1	0	0	56	12	0	10	3	13	0	66	53	0	31	20	0	22	0	46	1	24	44	0	0	22	0	16	30	24	0	1	42	0
2366	1-Jan-22	19:05:00	1	0	1	0	CT	0	1	0	0	62	4	0	11	9	39	0	3	11	7	49	23	0	0	0	60	0	33	20	0	0	25	0	26	10	45	50	0	13	13
2367	1-Jan-22	19:10:00	1	0	1	0	CT	0	1	0	0	39	15	0	9	20	55	0	0	0	5	25	15	0	0	0	37	0	17	45	0	0	47	2	8	50	36	7	16	9	12
2368	1-Jan-22	19:15:00	1	0	1	0	CT	0	1	0	49	15	0	0	21	15	28	0	0	0	0	32	46	0	0	0	12	0	24	28	0	0	78	0	27	32	27	19	25	46	0
2369	1-Jan-22	19:20:00	1	0	1	0	CT	0	1	0	12	38	0	0	23	42	22	1	0	0	0	5	27	0	0	0	46	9	17	28	0	0	1	0	13	13	36	3	32	26	0
2370	1-Jan-22	19:25:00	1	0	1	0	CT	0	1	0	9	15	0	0	21	50	18	0	0	0	0	22	22	0	0	0	77	0	15	13	0	0	0	0	2	39	7	3	13	29	0
2371	1-Jan-22	19:30:00	1	0	1	0	CT	0	1	0	3	52	24	0	9	47	14	0	0	0	0	35	0	0	0	0	42	10	12	23	0	0	0	0	1	27	14	52	9	32	0
2372	1-Jan-22	19:35:00	1	0	1	0	CT	0	1	52	12	56	10	0	10	21	0	0	0	0	0	45	0	0	0	0	26	5	8	30	0	0	0	0	2	17	13	0	68	18	0
2373	1-Jan-22	19:40:00	1	0	1	0	CT	0	1	9	25	41	0	0	15	2	1	46	0	0	0	38	3	0	0	0	43	41	29	19	0	0	0	3	0	52	25	0	4	30	0
2374	1-Jan-22	19:45:00	1	0	1	0	CT	0	1	0	24	54	3	0	13	6	52	23	0	0	1	9	35	0	15	0	0	61	8	19	38	0	0	0	0	21	12	0	0	25	0
2375	1-Jan-22	19:50:00	1	0	1	0	CT	0	1	0	15	60	0	0	9	55	4	50	0	0	1	39	20	0	39	0	9	45	0	40	45	0	0	3	0	20	15	6	0	22	0
2376	1-Jan-22	19:55:00	1	0	1	0	CT	0	1	0	28	53	0	10	20	6	48	28	0	0	43	4	38	0	34	0	22	72	0	29	0	0	0	0	0	28	39	0	0	18	6
2377	1-Jan-22	20:00:00	1	0	1	0	CT	0	1	0	0	29	52	68	14	43	37	63	0	0	11	26	32	0	62	0	29	46	0	26	0	0	0	0	2	1	63	0	0	20	18
2378	1-Jan-22	20:05:00	1	0	1	0	CT	0	1	0	0	45	79	40	24	8	26	0	5	0	32	35	17	0	10	0	0	64	0	45	16	0	0	0	0	31	11	3	0	31	14
2379	1-Jan-22	20:10:00	1	0	1	0	CT	0	1	0	0	3	14	0	14	0	8	0	48	0	0	25	22	0	0	0	5	25	0	73	42	0	0	21	7	41	66	1	0	14	0
2380	1-Jan-22	20:15:00	1	0	1	0	CT	0	1	0	0	0	27	0	20	0	19	34	63	27	0	14	28	0	0	0	48	0	0	1	28	0	0	19	8	63	5	55	0	16	0
2381	1-Jan-22	20:20:00	1	0	1	0	CT	0	1	0	0	0	0	0	10	3	0	19	45	34	1	58	6	0	0	0	33	0	0	45	54	0	38	52	21	73	37	29	0	30	0
2382	1-Jan-22	20:25:00	1	0	1	0	CT	0	1	0	0	0	16	0	12	5	39	4	30	32	1	35	18	0	2	0	4	0	0	24	39	0	33	1	42	23	35	6	0	32	0
2383	1-Jan-22	20:30:00	1	0	1	0	CT	0	1	0	0	5	23	0	0	2	19	5	34	6	0	26	18	0	0	0	3	0	0	34	20	0	11	48	43	0	14	44	0	28	0
2384	1-Jan-22	20:35:00	1	0	1	0	CT	0	1	0	0	0	59	0	11	3	0	30	21	31	0	0	12	0	4	0	49	0	0	21	10	0	0	0	49	23	46	0	0	25	0
2385	1-Jan-22	20:40:00	1	0	1	0	CT	0	1	1	0	5	36	0	19	0	20	2	13	38	19	12	22	0	0	0	0	21	8	32	10	0	0	32	6	21	32	0	0	6	0
2386	1-Jan-22	20:45:00	1	0	1	0	CT	0	1	0	2	4	4	0	3	40	41	0	4	0	41	42	18	0	14	0	0	0	10	38	9	0	0	9	7	13	18	3	0	32	0
2387	1-Jan-22	20:50:00	1	0	1	0	CT	0	1	2	37	4	0	0	3	28	1	0	6	0	52	23	30	0	67	0	0	0	59	15	21	0	0	3	14	30	7	0	8	23	0
2388	1-Jan-22	20:55:00	1	0	1	0	CT	0	1	52	20	2	2	12	9	33	19	0	1	0	0	52	31	0	42	0	0	0	39	30	37	0	0	28	1	12	23	0	26	29	6
2389	1-Jan-22	21:00:00	1	0	1	0	CT	0	1	0	9	0	15	11	6	43	23	0	0	0	0	24	29	0	32	0	0	1	23	31	50	0	0	0	23	0	25	4	49	17	10
2390	1-Jan-22	21:05:00	1	0	1	0	CT	0	1	0	0	24	4	0	14	34	39	0	0	0	0	63	45	0	56	0	0	9	9	45	0	0	0	0	22	0	39	1	0	28	0
2391	1-Jan-22	21:10:00	1	0	1	0	CT	0	1	0	24	25	1	9	22	8	30	0	0	0	0	13	25	0	31	0	18	0	19	24	0	0	0	8	7	0	19	5	4	15	0
2392	1-Jan-22	21:15:00	1	0	1	0	CT	0	1	0	4	14	6	54	11	0	29	0	0	0	0	37	23	0	11	0	35	4	23	17	0	0	0	6	33	0	8	0	14	10	0
2393	1-Jan-22	21:20:00	1	0	1	0	CT	0	1	0	15	29	33	63	17	0	24	0	0	0	0	4	32	0	13	0	52	34	6	15	0	0	0	5	39	0	32	1	0	3	0
2394	1-Jan-22	21:25:00	1	0	1	0	CT	0	1	0	55	12	73	47	12	0	42	0	0	0	0	18	5	0	34	0	48	55	9	25	0	0	0	3	16	0	21	5	46	0	0
2395	1-Jan-22	21:30:00	1	0	1	0	CT	0	1	0	4	5	2	0	15	0	23	0	0	0	0	20	14	0	37	0	44	43	6	16	0	0	10	6	0	0	40	1	51	19	0
2396	1-Jan-22	21:35:00	1	0	1	0	CT	0	1	0	0	3	41	0	7	0	53	4	0	0	77	23	20	0	19	0	9	2	1	47	0	0	0	0	0	0	21	10	0	18	15
2397	1-Jan-22	21:40:00	1	0	1	0	CT	0	1	0	0	0	10	0	10	0	15	81	0	0	39	30	16	0	0	0	38	0	37	32	0	0	16	6	2	0	32	33	7	0	2
2398	1-Jan-22	21:45:00	1	0	1	0	CT	0	1	0	0	17	0	0	9	0	18	52	5	16	6	30	5	0	0	0	53	0	16	18	0	0	67	2	5	0	10	28	0	31	1
2399	1-Jan-22	21:50:00	1	0	1	0	CT	0	1	0	0	12	0	0	14	0	61	0	1	0	1	6	22	0	0	0	8	0	3	39	29	0	32	0	4	0	13	8	0	34	0
2400	1-Jan-22	21:55:00	1	0	1	0	CT	0	1	0	3	0	4	0	24	0	60	0	27	0	0	0	36	0	0	0	19	0	36	34	0	0	8	0	19	0	16	0	0	41	0
2401	1-Jan-22	22:00:00	1	0	1	0	CT	0	1	4	0	0	10	0	7	0	49	0	56	0	0	43	7	0	0	0	15	0	8	15	1	0	3	0	32	0	43	0	0	29	0
2402	1-Jan-22	22:05:00	1	0	1	0	CT	0	1	0	0	49	0	0	9	0	24	0	14	17	0	35	6	0	2	0	32	11	0	15	16	0	0	0	38	0	10	0	0	15	14
2403	1-Jan-22	22:10:00	1	0	1	0	CT	0	1	0	1	39	0	0	3	0	0	0	31	52	0	7	31	0	0	0	48	72	0	27	48	0	0	14	12	0	6	30	0	8	18
2404	1-Jan-22	22:15:00	1	0	1	0	CT	0	1	27	0	31	19	0	93	21	0	0	16	31	0	0	27	0	0	0	4	56	0	31	0	0	0	2	0	0	14	23	0	0	6
2405	1-Jan-22	22:20:00	1	0	1	0	CT	0	1	73	0	1	48	0	4	2	20	0	21	0	0	3	11	0	0	0	18	44	0	15	0	0	0	4	0	0	15	0	0	0	0
2406	1-Jan-22	22:25:00	1	0	1	0	CT	0	1	52	0	7	2	39	8	0	29	4	42	0	0	35	15	0	3	0	18	25	0	33	0	0	0	5	0	0	43	0	0	0	0
2407	1-Jan-22	22:30:00	1	0	1	0	CT	0	1	2	2	42	0	43	3	2	55	40	12	0	0	38	17	0	0	0	1	0	0	33	41	0	0	5	3	0	7	3	16	0	0
2408	1-Jan-22	22:35:00	1	0	1	0	CT	0	1	0	14	38	1	35	2	10	55	18	46	0	0	34	5	0	55	0	13	0	0	37	11	0	0	2	0	0	14	83	8	3	0
2409	1-Jan-22	22:40:00	1	0	1	0	CT	0	1	0	14	36	7	3	11	2	55	0	7	0	0	25	0	0	48	0	0	0	0	29	1	0	32	2	24	0	20	43	27	9	0
2410	1-Jan-22	22:45:00	1	0	1	0	CT	0	1	0	11	47	5	3	22	40	27	0	0	0	0	32	1	0	22	0	0	0	0	23	58	0	6	0	4	1	14	0	4	16	24
2411	1-Jan-22	22:50:00	1	0	1	0	CT	0	1	0	0	39	4	0	13	0	26	0	9	0	0	22	30	0	78	0	9	0	0	26	45	0	35	0	8	3	14	21	2	7	13
2412	1-Jan-22	22:55:00	1	0	1	0	CT	0	1	0	51	52	0	1	12	42	8	0	0	0	0	14	16	0	22	0	15	0	0	24	18	0	33	0	0	21	4	2	0	30	10
2413	1-Jan-22	23:00:00	1	0	1	0	CT	0	1	0	44	31	0	0	22	28	0	0	0	0	2	22	21	0	42	0	0	0	0	25	36	0	33	1	0	0	21	0	0	6	0
2414	1-Jan-22	23:05:00	1	0	1	0	CT	0	1	0	4	41	0	0	14	17	0	0	1	0	3	37	35	0	16	0	4	0	0	10	0	0	18	2	11	2	0	0	1	0	0
2415	1-Jan-22	23:10:00	1	0	1	0	CT	0	1	0	0	47	15	0	56	22	6	0	4	3	21	10	11	0	57	0	43	9	0	44	0	0	0	0	4	0	10	0	2	16	1
2416	1-Jan-22	23:15:00	1	0	1	0	CT	0	1	0	0	5	43	0	0	19	0	0	0	0	0	45	29	0	20	0	46	53	0	17	0	0	0	0	23	0	44	1	0	45	0
2417	1-Jan-22	23:20:00	1	0	1	0	CT	0	1	0	0	1	16	2	3	6	0	0	0	0	36	27	32	0	11	0	5	35	17	8	99	0	0	0	24	1	4	0	0	27	0
2418	1-Jan-22	23:25:00	1	0	1	0	CT	0	1	0	0	2	24	1	12	14	0	0	0	4	38	24	44	0	31	0	13	25	55	32	30	0	0	0	28	0	4	0	0	23	0
2419	1-Jan-22	23:30:00	1	0	1	0	CT	0	1	0	0	3	0	15	11	4	6	0	0	3	0	0	19	0	6	0	3	24	11	34	0	0	0	0	21	0	42	38	0	34	0
2420	1-Jan-22	23:35:00	1	0	1	0	CT	0	1	0	0	0	1	0	20	0	9	3	0	13	0	0	17	0	26	0	3	0	9	43	51	0	0	0	8	0	8	93	0	17	0
2421	1-Jan-22	23:40:00	1	0	1	0	CT	0	1	0	0	0	0	0	7	0	50	0	0	13	0	0	21	0	14	0	0	0	6	50	15	0	0	0	5	0	42	44	13	20	0
2422	1-Jan-22	23:45:00	1	0	1	0	CT	0	1	0	0	1	0	0	14	0	41	0	12	0	0	0	25	0	0	0	0	0	43	29	0	0	0	0	3	0	19	0	52	40	0
2423	1-Jan-22	23:50:00	1	0	1	0	CT	0	1	0	0	0	0	0	17	0	47	0	44	0	0	3	15	0	6	0	0	0	14	22	0	0	0	0	35	0	33	12	19	18	0
2424	1-Jan-22	23:55:00	1	0	1	0	CT	0	1	0	0	0	45	0	0	0	57	0	46	0	0	33	16	0	0	0	21	0	11	18	0	0	0	0	46	0	32	0	32	16	0
2425	2-Jan-22	0:00:00	1	0	1	0	CT	0	1	0	0	18	38	0	8	0	41	0	34	0	0	2	19	0	8	0	50	0	0	77	0	0	0	0	17	0	55	4	0	22	0
2426	2-Jan-22	0:05:00	1	0	1	0	CT	0	0	0	0	0	0	0	0	0	0	0	0	0	0	0	0	0	0	0	20	0	0	1	1	0	21	0	0	63	0	10	0	0	16
2427	2-Jan-22	0:10:00	1	0	1	0	CT	0	0	0	0	0	0	0	0	0	0	0	0	0	0	29	0	0	0	0	12	0	6	2	47	0	36	0	0	32	0	0	1	0	3
2428	2-Jan-22	0:15:00	1	0	1	0	CT	0	0	8	0	0	0	25	0	1	0	0	0	0	0	13	0	0	0	0	0	0	10	5	14	0	39	4	0	9	0	0	12	0	5
2429	2-Jan-22	0:20:00	1	0	1	0	CT	0	0	37	0	0	0	86	0	53	0	0	0	0	0	0	0	0	0	0	41	0	34	7	40	0	0	3	0	16	0	0	0	0	0
2430	2-Jan-22	0:25:00	1	0	1	0	CT	0	0	8	29	0	5	47	0	0	0	0	0	0	0	0	0	0	0	0	28	0	0	3	3	0	27	4	20	0	0	0	0	0	0
2431	2-Jan-22	0:30:00	1	0	1	0	CT	0	0	44	55	0	0	13	0	1	0	0	0	0	0	0	0	0	0	0	36	10	0	39	16	0	24	0	21	0	0	0	0	0	0
2432	2-Jan-22	0:35:00	1	0	1	0	CT	0	0	24	0	0	0	0	0	0	0	0	0	0	56	0	0	0	0	0	0	89	0	32	59	0	0	2	11	1	0	0	0	0	4
2433	2-Jan-22	0:40:00	1	0	1	0	CT	0	0	7	36	5	0	0	0	3	0	0	0	0	76	2	0	0	0	0	0	82	0	103	12	0	24	0	2	0	0	0	0	0	6
2434	2-Jan-22	0:45:00	1	0	1	0	CT	0	0	0	34	38	0	8	0	1	26	0	6	0	69	1	0	0	0	0	0	57	0	29	17	0	0	0	1	0	0	11	0	0	14
2435	2-Jan-22	0:50:00	1	0	1	0	CT	0	0	0	23	42	0	70	0	0	28	3	40	0	39	44	0	0	0	0	3	51	0	27	16	0	0	0	0	2	0	4	0	0	0
2436	2-Jan-22	0:55:00	1	0	1	0	CT	0	0	59	0	26	0	33	0	0	5	97	29	0	52	18	0	0	0	0	0	25	0	0	30	0	0	0	0	2	1	35	16	0	28
2437	2-Jan-22	1:00:00	1	0	1	0	CT	0	0	26	0	77	0	49	0	0	18	26	20	0	26	0	0	0	0	0	0	67	0	0	20	0	0	0	0	1	0	62	33	9	12
2438	2-Jan-22	1:05:00	1	0	1	0	CT	0	0	61	17	30	0	49	0	0	81	53	57	0	34	0	0	0	0	0	48	40	0	0	0	0	0	2	0	0	0	81	9	31	25
2439	2-Jan-22	1:10:00	1	0	1	0	CT	0	0	14	38	30	1	55	0	3	1	4	36	0	2	0	0	0	0	0	38	3	0	19	28	0	6	0	0	8	0	29	0	1	0
2440	2-Jan-22	1:15:00	1	0	1	0	CT	0	0	0	25	53	4	1	0	0	0	0	26	23	1	0	0	0	0	0	53	3	1	50	21	0	9	0	0	0	0	59	11	0	0
2441	2-Jan-22	1:20:00	1	0	1	0	CT	0	0	63	30	46	51	68	0	63	0	0	1	12	0	54	0	0	0	0	26	0	0	11	47	0	30	0	0	47	0	63	23	0	21
2442	2-Jan-22	1:25:00	1	0	1	0	CT	0	0	25	14	52	19	51	0	7	6	0	0	9	0	20	0	0	3	0	44	0	0	0	7	0	26	0	0	66	0	13	78	10	22
2443	2-Jan-22	1:30:00	1	0	1	0	CT	0	0	2	1	77	0	41	0	7	2	0	0	15	0	0	0	0	44	0	83	0	0	0	0	0	56	0	0	0	0	20	67	34	0
2444	2-Jan-22	1:35:00	1	0	1	0	CT	0	0	7	14	39	0	42	0	11	0	15	0	8	0	0	0	0	40	0	13	0	14	23	0	0	30	0	0	0	0	0	17	40	34
2445	2-Jan-22	1:40:00	1	0	1	0	CT	0	0	13	24	39	0	34	0	0	0	2	0	47	0	31	0	0	43	0	86	0	4	0	0	0	38	0	3	0	0	0	0	51	30
2446	2-Jan-22	1:45:00	1	0	1	0	CT	0	0	19	24	33	0	46	0	0	0	12	0	39	16	54	17	0	19	0	51	0	0	59	14	0	0	0	0	0	0	25	0	0	0
2447	2-Jan-22	1:50:00	1	0	1	0	CT	0	0	9	5	22	22	4	0	34	2	82	0	11	26	30	27	0	21	0	19	25	0	0	46	0	0	0	0	0	0	67	0	0	0
2448	2-Jan-22	1:55:00	1	0	1	0	CT	0	0	0	5	31	15	2	0	61	2	59	0	0	20	0	9	0	71	0	86	38	0	0	7	0	0	0	5	0	0	93	0	0	0
2449	2-Jan-22	2:00:00	1	0	1	0	CT	0	0	49	25	30	0	16	0	5	0	49	9	0	16	0	19	0	11	0	63	22	17	75	18	0	0	0	0	0	0	26	27	0	27
2450	2-Jan-22	2:05:00	1	0	1	0	CT	0	0	25	25	18	10	0	10	37	11	5	22	0	84	24	75	0	32	0	0	44	58	23	0	0	1	0	0	0	0	0	0	0	0
2451	2-Jan-22	2:10:00	1	0	1	0	CT	0	0	5	16	29	3	0	6	54	42	9	23	0	23	50	40	0	11	0	74	2	13	14	29	0	56	0	2	52	0	0	0	17	0
2452	2-Jan-22	2:15:00	1	0	1	0	CT	0	0	17	34	49	10	0	7	21	46	0	23	0	2	49	0	0	0	0	68	0	27	0	19	0	59	0	59	16	0	43	0	35	0
2453	2-Jan-22	2:20:00	1	0	1	0	CT	0	0	0	14	42	0	0	8	46	19	0	54	0	0	43	0	0	0	0	58	0	7	0	35	0	1	0	69	0	24	58	0	24	12
2454	2-Jan-22	2:25:00	1	0	1	0	CT	0	0	0	12	33	4	0	4	37	9	0	59	0	0	46	1	0	0	0	39	7	40	38	0	0	0	0	32	0	25	51	0	0	24
2455	2-Jan-22	2:30:00	1	0	1	0	CT	0	0	1	0	29	0	59	48	25	0	0	38	0	0	23	1	0	0	0	36	2	9	51	0	0	0	0	1	0	85	21	0	0	3
2456	2-Jan-22	2:35:00	1	0	1	0	CT	0	0	0	11	39	0	58	40	28	0	0	27	0	0	0	0	0	23	0	3	3	27	9	10	0	15	0	0	0	17	84	0	0	1
2457	2-Jan-22	2:40:00	1	0	1	0	CT	0	0	4	0	27	0	44	0	29	0	31	1	0	5	0	0	0	30	0	50	18	19	10	48	0	0	0	0	0	0	23	0	0	1
2458	2-Jan-22	2:45:00	1	0	1	0	CT	0	0	63	0	35	0	19	0	65	0	17	32	0	59	21	0	0	40	0	34	43	1	47	70	0	0	0	0	0	0	0	0	0	0
2459	2-Jan-22	2:50:00	1	0	1	0	CT	0	0	7	13	40	0	23	0	33	0	0	55	0	27	49	0	0	42	0	20	64	52	36	22	0	39	0	0	0	14	15	0	0	3
2460	2-Jan-22	2:55:00	1	0	1	0	CT	0	0	4	14	32	5	21	0	15	26	1	48	4	3	57	3	0	0	0	46	43	0	74	71	0	34	0	6	0	30	27	16	0	1
2461	2-Jan-22	3:00:00	1	0	1	0	CT	0	0	12	18	19	24	35	49	0	39	14	7	24	8	47	38	0	0	0	24	51	0	18	18	0	13	0	37	22	24	70	31	0	5
2462	2-Jan-22	3:05:00	1	0	1	0	CT	0	0	48	23	16	58	76	18	67	25	41	0	36	2	17	10	0	8	0	59	0	28	5	2	0	43	0	39	81	34	50	0	0	3
2463	2-Jan-22	3:10:00	1	0	1	0	CT	0	0	20	0	20	2	19	8	9	9	84	0	47	2	0	0	0	29	0	72	0	25	25	70	0	24	0	28	15	32	59	0	0	28
2464	2-Jan-22	3:15:00	1	0	1	0	CT	0	0	0	0	45	0	28	35	0	0	49	12	30	0	16	0	0	39	0	56	0	44	34	38	0	67	0	34	14	18	67	1	0	35
2465	2-Jan-22	3:20:00	1	0	1	0	CT	0	0	0	11	30	10	47	1	8	14	42	0	10	0	45	0	0	41	0	3	0	8	51	58	0	33	0	0	41	31	61	34	0	1
2466	2-Jan-22	3:25:00	1	0	1	0	CT	0	0	0	14	54	11	4	23	24	19	87	0	34	9	22	0	0	71	0	41	0	1	11	9	0	11	0	0	46	3	52	43	16	16
2467	2-Jan-22	3:30:00	1	0	1	0	CT	0	0	0	0	33	9	6	3	0	13	2	0	0	0	0	0	0	9	0	64	26	0	19	31	0	54	0	0	2	0	19	18	11	0
2468	2-Jan-22	3:35:00	1	0	1	0	CT	0	0	0	28	20	3	4	35	2	13	0	0	0	0	22	0	0	0	0	24	59	10	4	8	0	11	0	5	63	0	0	4	22	0
2469	2-Jan-22	3:40:00	1	0	1	0	CT	0	0	0	14	13	3	0	24	0	42	0	38	0	0	79	0	0	1	0	8	24	8	0	0	0	1	0	17	0	0	52	0	30	0
2470	2-Jan-22	3:45:00	1	0	1	0	CT	0	0	0	20	2	15	0	14	7	51	0	26	0	0	40	0	0	0	0	80	58	45	32	18	0	49	0	17	0	0	27	31	1	0
2471	2-Jan-22	3:50:00	1	0	1	0	CT	0	0	0	34	53	27	37	23	51	45	0	32	0	15	50	0	0	0	0	22	0	27	30	14	0	17	0	7	0	0	14	4	6	5
2472	2-Jan-22	3:55:00	1	0	1	0	CT	0	0	0	0	19	44	62	26	30	25	0	27	0	53	30	30	0	3	0	3	0	11	29	89	0	0	0	50	27	0	0	49	0	0
2473	2-Jan-22	4:00:00	1	0	1	0	CT	0	0	19	0	29	0	68	0	63	0	0	0	0	34	22	0	0	47	0	1	0	61	5	55	0	0	0	50	49	6	23	18	34	0
2474	2-Jan-22	4:05:00	1	0	1	0	CT	0	0	3	13	21	0	12	20	63	0	0	0	31	0	44	0	0	32	0	4	19	32	5	23	0	0	0	22	38	0	21	7	0	3
2475	2-Jan-22	4:10:00	1	0	1	0	CT	0	0	28	18	44	24	4	20	60	0	55	3	40	0	31	0	0	11	0	55	79	14	2	22	0	0	0	0	30	0	3	0	9	0
2476	2-Jan-22	4:15:00	1	0	1	0	CT	0	0	7	25	16	0	52	0	42	0	43	40	23	0	51	28	0	0	0	49	39	9	25	55	0	0	0	1	0	0	8	1	11	5
2477	2-Jan-22	4:20:00	1	0	1	0	CT	0	0	31	12	31	0	57	0	89	16	25	33	25	7	23	36	0	0	0	46	65	0	17	68	0	0	0	9	0	0	65	0	1	10
2478	2-Jan-22	4:25:00	1	0	1	0	CT	0	0	34	30	37	0	54	0	34	59	11	29	40	0	13	31	0	0	0	30	22	4	25	35	0	0	0	15	16	0	47	0	0	35
2479	2-Jan-22	4:30:00	1	0	1	0	CT	0	0	28	10	28	26	49	0	30	0	0	57	22	22	21	1	0	0	0	47	54	20	3	7	0	0	0	70	67	0	0	0	0	0
2480	2-Jan-22	4:35:00	1	0	1	0	CT	0	0	23	0	28	8	52	0	50	0	0	18	1	21	27	3	0	19	0	30	21	6	12	22	0	13	0	60	6	0	12	0	0	12
2481	2-Jan-22	4:40:00	1	0	1	0	CT	0	0	39	8	36	0	46	11	12	2	20	0	1	14	0	0	0	33	0	5	66	35	0	24	0	8	0	24	46	0	21	7	22	56
2482	2-Jan-22	4:45:00	1	0	1	0	CT	0	0	2	6	15	4	52	0	24	0	61	43	0	13	42	0	0	10	0	58	62	1	2	41	0	34	0	0	0	21	82	2	1	59
2483	2-Jan-22	4:50:00	1	0	1	0	CT	0	0	19	3	47	24	7	2	3	31	58	27	5	3	56	0	0	0	0	1	58	0	39	40	0	2	0	3	0	25	48	0	21	0
2484	2-Jan-22	4:55:00	1	0	1	0	CT	0	0	17	33	28	40	58	11	0	20	0	12	35	4	39	38	0	2	0	0	60	16	12	43	0	20	0	63	28	9	49	0	27	0
2485	2-Jan-22	5:00:00	1	0	1	0	CT	0	0	3	34	17	19	45	39	0	1	0	8	0	29	37	30	0	1	0	0	23	39	0	0	0	32	0	48	8	23	48	2	9	0
2486	2-Jan-22	5:05:00	1	0	1	0	CT	0	0	0	22	51	0	0	7	0	0	0	22	0	38	3	15	0	1	0	17	29	24	0	63	0	55	0	8	0	20	5	50	4	0
2487	2-Jan-22	5:10:00	1	0	1	0	CT	0	0	14	28	14	28	0	10	0	0	0	0	0	19	44	60	0	24	0	73	57	5	0	63	0	51	0	15	3	32	31	15	0	0
2488	2-Jan-22	5:15:00	1	0	1	0	CT	0	0	8	17	51	31	52	12	0	0	0	8	0	24	34	32	0	39	0	10	41	5	39	1	0	76	0	0	54	12	35	0	2	17
2489	2-Jan-22	5:20:00	1	0	1	0	CT	0	0	22	0	3	19	34	23	0	2	0	13	50	12	33	10	0	33	0	55	45	16	40	36	0	59	0	0	35	10	67	0	14	0
2490	2-Jan-22	5:25:00	1	0	1	0	CT	0	0	16	17	21	11	38	4	73	0	49	0	13	41	23	27	0	0	0	70	2	17	14	57	0	3	0	0	0	0	84	0	41	0
2491	2-Jan-22	5:30:00	1	0	1	0	CT	0	0	6	21	60	0	42	8	36	13	0	8	20	53	32	23	0	0	0	57	11	31	60	63	0	29	0	1	4	0	32	0	47	0
2492	2-Jan-22	5:35:00	1	0	1	0	CT	0	0	69	33	40	23	44	8	40	45	55	39	6	10	24	14	0	25	0	9	28	0	4	0	0	0	0	40	1	0	8	0	18	0
2493	2-Jan-22	5:40:00	1	0	1	0	CT	0	0	13	0	21	24	79	5	32	28	51	12	27	0	21	3	0	5	0	35	5	23	21	0	0	1	0	32	4	0	0	0	5	0
2494	2-Jan-22	5:45:00	1	0	1	0	CT	0	0	69	15	34	40	23	20	126	50	51	6	22	0	22	24	0	20	0	46	28	25	38	0	0	39	0	3	0	0	25	0	25	0
2495	2-Jan-22	5:50:00	1	0	1	0	CT	0	0	19	33	39	20	27	15	29	53	20	0	2	9	34	44	0	37	0	67	69	11	22	0	0	26	0	19	0	0	18	0	25	0
2496	2-Jan-22	5:55:00	1	0	1	0	CT	0	0	0	12	18	33	0	6	4	25	38	3	0	49	0	56	0	15	0	23	46	14	63	3	0	19	0	57	0	0	50	0	6	0
2497	2-Jan-22	6:00:00	1	0	1	0	CT	0	0	0	45	40	0	57	15	0	0	0	42	0	0	7	3	0	20	0	65	41	13	51	12	0	10	0	10	28	0	18	0	20	0
2498	2-Jan-22	6:05:00	1	0	1	0	CT	0	0	0	23	38	10	43	17	0	0	0	2	20	0	69	0	0	38	0	0	0	0	60	36	0	50	0	2	34	3	25	0	0	0
2499	2-Jan-22	6:10:00	1	0	1	0	CT	0	0	0	9	68	39	37	33	48	0	50	33	7	25	48	50	0	68	0	17	35	41	63	21	0	9	0	40	85	17	57	21	13	0
2500	2-Jan-22	6:15:00	1	0	1	0	CT	0	0	0	21	55	28	0	18	23	0	18	37	12	31	28	26	0	0	0	29	49	30	56	51	0	40	0	29	32	0	54	61	3	0
2501	2-Jan-22	6:20:00	1	0	1	0	CT	0	0	0	27	39	0	61	75	18	0	4	22	35	30	42	0	0	18	0	49	51	18	21	0	0	20	0	11	0	0	19	61	0	0
2502	2-Jan-22	6:25:00	1	0	1	0	CT	0	0	0	30	32	10	85	7	4	0	1	52	30	12	45	13	0	6	0	32	20	63	37	8	0	20	0	4	4	0	28	39	9	0
2503	2-Jan-22	6:30:00	1	0	1	0	CT	0	0	0	31	26	27	66	27	36	0	15	42	28	27	28	51	0	0	0	45	22	4	38	27	0	3	0	24	57	6	17	0	51	0
2504	2-Jan-22	6:35:00	1	0	1	0	CT	0	0	0	51	23	0	31	11	43	37	0	0	38	0	49	30	0	0	0	62	63	0	5	24	0	10	0	6	62	4	3	0	37	24
2505	2-Jan-22	6:40:00	1	0	1	0	CT	0	0	0	23	14	0	29	0	56	35	0	0	41	0	36	57	0	0	0	44	70	12	45	0	0	7	0	45	16	19	1	63	27	14
2506	2-Jan-22	6:45:00	1	0	1	0	CT	0	0	5	47	31	48	0	23	23	0	0	5	30	40	28	24	0	0	0	65	53	10	75	18	0	60	0	27	11	42	7	1	23	1
2507	2-Jan-22	6:50:00	1	0	1	0	CT	0	0	40	38	14	2	42	14	20	9	0	21	17	77	82	42	0	30	0	71	69	39	36	77	0	82	0	19	62	40	49	1	13	0
2508	2-Jan-22	6:55:00	1	0	1	0	CT	0	0	46	80	56	31	53	4	59	8	0	33	23	14	40	36	0	50	0	22	65	3	26	43	0	7	0	15	30	43	35	2	1	3
2509	2-Jan-22	7:00:00	1	0	1	0	CT	0	0	5	26	17	28	32	14	41	43	0	5	9	18	7	28	0	51	0	62	58	0	35	13	0	62	0	19	25	45	34	0	50	4
2510	2-Jan-22	7:05:00	1	0	1	0	CT	0	0	1	20	41	21	59	10	63	44	0	8	34	37	47	26	0	41	0	50	48	24	39	63	0	2	0	35	18	23	12	1	16	25
2511	2-Jan-22	7:10:00	1	0	1	0	CT	0	0	0	25	25	15	45	14	41	74	24	9	27	17	48	31	0	18	0	76	81	45	37	35	0	0	0	80	3	28	28	0	5	40
2512	2-Jan-22	7:15:00	1	0	1	0	CT	0	0	6	9	51	0	51	77	25	20	3	16	16	6	44	4	0	36	0	48	50	22	103	37	0	27	0	12	107	15	83	0	0	0
2513	2-Jan-22	7:20:00	1	0	1	0	CT	0	0	0	20	27	9	18	23	76	22	0	59	8	51	72	35	0	2	0	59	57	3	46	47	0	52	0	0	32	20	5	0	0	0
2514	2-Jan-22	7:25:00	1	0	1	0	CT	0	0	0	8	4	39	61	30	0	0	0	60	27	11	58	40	0	0	0	64	57	0	31	5	0	23	0	0	30	19	19	0	0	0
2515	2-Jan-22	7:30:00	1	0	1	0	CT	0	0	0	0	58	31	72	0	0	0	0	79	9	0	47	10	0	51	0	21	70	10	1	63	0	0	0	2	60	45	39	0	0	0
2516	2-Jan-22	7:35:00	1	0	1	0	CT	0	0	0	0	48	2	50	34	6	31	0	74	15	17	2	17	0	49	0	46	96	6	7	51	0	0	0	13	0	43	55	1	2	4
2517	2-Jan-22	7:40:00	1	0	1	0	CT	0	0	0	25	34	19	26	6	65	23	0	45	41	4	19	0	0	63	0	58	52	0	1	2	0	0	0	0	59	11	37	0	29	0
2518	2-Jan-22	7:45:00	1	0	1	0	CT	0	0	0	2	18	0	13	0	3	54	8	20	18	75	55	0	0	63	0	37	75	0	0	0	0	5	0	0	86	0	35	0	14	0
2519	2-Jan-22	7:50:00	1	0	1	0	CT	0	0	0	8	71	0	45	29	0	48	1	0	13	0	58	0	0	0	0	8	90	0	0	51	0	34	0	0	66	0	12	0	0	0
2520	2-Jan-22	7:55:00	1	0	1	0	CT	0	0	0	7	32	0	55	21	0	21	0	0	0	0	47	0	0	33	0	49	60	0	0	3	0	9	0	20	0	0	20	0	0	0
2521	2-Jan-22	8:00:00	1	0	1	0	CT	0	1	11	57	103	12	60	0	13	27	1	0	3	8	46	0	0	1	0	52	63	0	3	97	0	4	0	0	31	1	76	0	3	0
2522	2-Jan-22	8:05:00	1	0	1	0	CT	0	1	10	0	53	40	72	0	66	21	66	28	18	62	61	50	0	38	0	88	97	38	28	3	0	2	0	56	47	65	112	0	36	34
2523	2-Jan-22	8:10:00	1	0	1	0	CT	0	1	0	26	69	2	65	29	80	50	25	55	19	32	29	42	0	63	0	110	36	1	48	0	0	64	0	45	44	28	83	17	74	0
2524	2-Jan-22	8:15:00	1	0	1	0	CT	0	1	0	28	34	15	37	14	36	76	77	60	42	14	97	53	0	31	0	41	47	23	57	4	0	58	0	63	70	69	3	22	36	0
2525	2-Jan-22	8:20:00	1	0	1	0	CT	0	1	0	28	54	0	7	26	56	70	73	57	44	0	49	17	0	31	0	45	40	9	42	58	0	9	0	32	48	23	14	15	33	1
2526	2-Jan-22	8:25:00	1	0	1	0	CT	0	1	0	3	54	5	0	1	50	33	54	59	30	23	35	17	0	0	0	63	70	0	71	26	0	63	0	34	71	16	13	83	36	10
2527	2-Jan-22	8:30:00	1	0	1	0	CT	0	1	6	0	67	21	0	21	14	47	43	17	20	35	38	28	0	0	0	30	41	0	60	44	0	55	0	54	66	36	12	59	36	36
2528	2-Jan-22	8:35:00	1	0	1	0	CT	0	1	70	9	47	20	0	28	50	54	0	29	20	23	51	57	0	0	0	6	70	4	42	5	0	51	0	26	61	30	0	35	25	9
2529	2-Jan-22	8:40:00	1	0	1	0	CT	0	1	36	0	63	30	0	2	57	46	0	20	3	56	44	36	0	0	0	46	46	19	38	58	0	28	0	28	20	53	0	34	23	30
2530	2-Jan-22	8:45:00	1	0	1	0	CT	0	1	7	14	64	19	3	43	37	43	0	27	29	3	47	0	0	6	0	73	31	45	60	21	0	85	0	45	38	45	0	0	20	0
2531	2-Jan-22	8:50:00	1	0	1	0	CT	0	1	17	13	26	27	35	7	63	39	0	0	12	7	28	10	0	33	0	44	31	2	40	39	0	38	0	31	20	25	0	0	53	5
2532	2-Jan-22	8:55:00	1	0	1	0	CT	0	1	4	19	17	1	41	33	8	40	0	0	0	11	39	31	0	66	0	19	43	24	28	24	0	0	0	13	44	0	0	0	18	0
2533	2-Jan-22	9:00:00	1	0	1	0	CT	0	1	0	59	15	11	0	13	29	43	0	31	2	10	58	54	0	1	0	39	35	14	17	0	0	54	0	31	75	0	0	0	40	0
2534	2-Jan-22	9:05:00	1	0	1	0	CT	0	1	0	11	43	26	0	19	71	35	0	0	24	23	43	20	0	0	0	23	60	6	19	0	0	0	0	41	85	24	0	0	39	0
2535	2-Jan-22	9:10:00	1	0	1	0	CT	0	1	0	26	47	17	0	33	7	40	0	20	47	11	35	28	0	0	0	42	61	0	9	16	0	0	0	19	6	2	0	0	6	11
2536	2-Jan-22	9:15:00	1	0	1	0	CT	0	1	0	13	5	16	0	24	24	19	0	41	0	22	8	4	0	0	0	30	23	0	19	35	0	0	0	68	38	27	0	0	27	54
2537	2-Jan-22	9:20:00	1	0	1	0	CT	0	1	0	80	55	14	0	29	56	32	0	29	0	0	15	31	0	0	0	33	2	0	19	7	0	0	0	0	25	19	0	0	23	13
2538	2-Jan-22	9:25:00	1	0	1	0	CT	0	1	0	19	55	0	0	27	48	46	0	19	0	21	15	26	0	0	0	13	3	0	27	0	0	0	0	20	17	0	0	0	0	0
2539	2-Jan-22	9:30:00	1	0	1	0	CT	0	1	0	0	24	0	0	19	9	46	6	18	0	24	43	2	0	0	0	0	6	0	16	0	0	0	0	32	27	41	1	0	34	13
2540	2-Jan-22	9:35:00	1	0	1	0	CT	0	1	0	0	72	3	0	0	23	47	0	4	0	0	34	22	0	11	0	0	0	0	12	0	0	0	0	26	0	15	0	0	37	5
2541	2-Jan-22	9:40:00	1	0	1	0	CT	0	1	0	0	57	0	0	18	12	6	0	5	0	0	11	0	0	41	0	9	0	0	4	0	0	0	0	0	0	13	0	0	24	6
2542	2-Jan-22	9:45:00	1	0	1	0	CT	0	1	0	0	34	0	0	16	0	0	1	0	15	0	47	0	0	47	0	0	4	0	7	0	0	0	0	5	0	5	4	0	11	0
2543	2-Jan-22	9:50:00	1	0	1	0	CT	0	1	0	0	1	4	13	38	0	0	1	0	15	0	21	0	0	13	0	4	3	0	17	0	0	0	0	8	33	0	28	0	0	14
2544	2-Jan-22	9:55:00	1	0	1	0	CT	0	1	0	0	26	0	1	17	15	3	0	0	0	25	0	0	0	0	0	28	12	0	4	0	0	0	0	25	37	24	42	0	15	0
2545	2-Jan-22	10:00:00	1	0	1	0	CT	0	1	0	0	48	12	53	5	8	37	0	0	0	2	0	0	0	0	0	8	14	0	0	0	0	0	0	0	15	34	58	0	29	3
2546	2-Jan-22	10:05:00	1	0	1	0	CT	0	1	56	0	62	0	58	14	9	25	0	0	0	0	3	0	0	0	0	0	1	0	5	2	0	0	0	6	0	24	32	0	24	2
2547	2-Jan-22	10:10:00	1	0	1	0	CT	0	1	0	37	43	4	68	22	8	27	0	0	0	0	40	0	0	0	0	0	0	0	4	1	0	0	0	13	0	40	0	0	37	12
2548	2-Jan-22	10:15:00	1	0	1	0	CT	0	1	0	0	4	9	0	52	21	19	0	0	0	0	0	0	0	0	0	10	0	0	14	26	0	0	0	1	0	0	22	0	24	36
2549	2-Jan-22	10:20:00	1	0	1	0	CT	0	1	0	0	48	0	0	11	54	7	0	0	0	0	0	0	0	1	0	0	0	4	47	21	0	2	0	28	0	28	49	0	28	0
2550	2-Jan-22	10:25:00	1	0	1	0	CT	0	1	0	1	74	3	0	12	42	44	0	0	0	1	15	0	0	0	0	31	0	14	48	24	0	55	0	30	10	3	5	0	12	10
2551	2-Jan-22	10:30:00	1	0	1	0	CT	0	1	0	2	27	0	0	5	10	43	0	0	10	16	50	0	0	0	0	35	0	8	46	1	0	1	0	4	35	6	32	0	6	0
2552	2-Jan-22	10:35:00	1	0	1	0	CT	0	1	0	0	11	0	0	11	3	18	5	5	0	10	36	0	0	2	0	0	0	69	61	0	0	0	0	0	22	25	0	0	0	0
2553	2-Jan-22	10:40:00	1	0	1	0	CT	0	1	0	0	0	0	0	16	0	0	5	0	1	0	32	0	0	37	0	0	13	30	38	0	0	0	0	0	1	46	0	0	36	5
2554	2-Jan-22	10:45:00	1	0	1	0	CT	0	1	0	1	65	0	0	7	19	0	0	0	0	0	6	0	0	47	0	2	59	37	26	0	0	0	0	0	2	5	48	0	8	0
2555	2-Jan-22	10:50:00	1	0	1	0	CT	0	1	0	0	28	0	0	29	2	0	5	0	0	7	19	0	0	21	0	15	17	33	33	3	0	0	0	0	7	7	13	20	6	0
2556	2-Jan-22	10:55:00	1	0	1	0	CT	0	1	0	0	50	18	0	23	4	10	0	0	0	3	10	0	0	16	0	17	37	10	2	13	0	0	0	1	0	14	0	16	0	0
2557	2-Jan-22	11:00:00	1	0	1	0	CT	0	1	0	0	60	2	0	11	2	12	0	0	2	41	5	0	0	29	0	0	52	0	20	4	0	0	0	3	0	15	0	34	18	0
2558	2-Jan-22	11:05:00	1	0	1	0	CT	0	1	0	1	37	0	0	13	0	0	0	0	4	0	27	0	0	0	0	9	20	0	24	13	0	2	0	4	0	0	0	16	18	0
2559	2-Jan-22	11:10:00	1	0	1	0	CT	0	1	0	1	2	2	0	3	0	0	5	0	18	0	18	0	0	0	0	0	0	0	7	32	0	5	0	1	4	13	0	0	1	0
2560	2-Jan-22	11:15:00	1	0	1	0	CT	0	1	0	0	39	2	0	3	10	0	49	9	1	0	28	0	0	0	0	0	0	0	18	15	0	0	0	8	32	0	2	2	20	0
2561	2-Jan-22	11:20:00	1	0	1	0	CT	0	1	0	17	35	0	0	7	46	0	5	0	10	0	8	0	0	0	0	1	0	0	18	0	0	0	0	15	34	0	0	0	32	46
2562	2-Jan-22	11:25:00	1	0	1	0	CT	0	1	0	24	57	0	1	8	23	0	0	0	26	0	32	0	0	0	0	0	0	0	14	25	0	0	0	8	50	25	0	0	0	0
2563	2-Jan-22	11:30:00	1	0	1	0	CT	0	1	0	13	22	2	2	5	0	0	0	0	25	7	41	73	0	0	0	0	0	0	18	52	0	0	0	67	71	32	0	2	0	15
2564	2-Jan-22	11:35:00	1	0	1	0	CT	0	1	0	83	0	9	12	11	5	0	0	4	58	35	21	77	0	0	0	0	0	0	18	0	0	0	0	19	34	21	28	0	0	3
2565	2-Jan-22	11:40:00	1	0	1	0	CT	0	1	0	21	0	5	0	13	14	0	0	0	0	0	11	33	0	0	0	0	0	0	31	0	0	0	0	7	58	46	10	0	0	0
2566	2-Jan-22	11:45:00	1	0	1	0	CT	0	1	0	8	54	12	0	9	8	0	0	18	24	0	7	50	0	0	0	0	0	0	39	7	0	6	0	11	17	28	0	2	0	12
2567	2-Jan-22	11:50:00	1	0	1	0	CT	0	1	0	13	61	56	0	9	9	6	0	57	6	0	46	56	0	0	0	17	1	0	22	0	0	0	0	7	50	40	0	12	9	22
2568	2-Jan-22	11:55:00	1	0	1	0	CT	0	1	3	28	23	24	0	11	31	33	0	51	19	0	37	32	0	0	0	32	4	0	12	4	0	0	0	8	31	21	0	0	24	14
2569	2-Jan-22	12:00:00	1	0	1	0	CT	0	1	43	24	21	0	0	21	73	32	0	38	0	0	31	17	0	0	0	21	3	0	6	0	0	0	0	15	3	12	9	0	18	0
2570	2-Jan-22	12:05:00	1	0	1	0	CT	0	1	37	47	23	4	0	16	46	65	2	0	0	17	38	26	0	0	0	3	1	38	0	29	0	1	0	26	55	23	0	0	43	0
2571	2-Jan-22	12:10:00	1	0	1	0	CT	0	1	3	52	3	0	0	6	19	5	2	6	0	0	15	40	0	0	0	24	0	8	3	0	0	0	0	10	51	4	0	0	27	30
2572	2-Jan-22	12:15:00	1	0	1	0	CT	0	1	0	10	2	0	0	5	57	0	0	0	0	31	31	21	0	0	0	47	26	28	7	4	0	0	0	5	53	15	4	0	36	0
2573	2-Jan-22	12:20:00	1	0	1	0	CT	0	1	0	17	6	4	38	9	4	0	0	0	0	28	6	31	0	0	0	8	67	34	12	0	0	0	0	0	1	2	29	0	26	11
2574	2-Jan-22	12:25:00	1	0	1	0	CT	0	1	0	0	0	66	0	28	21	0	0	0	0	0	24	12	0	0	0	0	29	16	17	0	0	3	0	0	0	39	0	0	1	0
2575	2-Jan-22	12:30:00	1	0	1	0	CT	0	1	0	9	0	46	1	11	24	4	0	0	0	0	11	18	0	22	0	0	70	10	14	0	0	3	0	0	14	15	0	0	19	17
2576	2-Jan-22	12:35:00	1	0	1	0	CT	0	1	0	59	47	21	0	27	12	0	0	0	5	1	23	51	0	47	0	3	32	0	52	1	0	0	0	0	7	26	38	0	3	32
2577	2-Jan-22	12:40:00	1	0	1	0	CT	0	1	0	1	63	0	0	26	10	0	48	0	0	1	36	42	0	10	0	1	0	4	19	0	0	0	0	14	35	22	50	0	35	2
2578	2-Jan-22	12:45:00	1	0	1	0	CT	0	1	2	0	54	0	0	8	19	3	3	0	0	1	41	56	0	1	0	0	0	0	4	0	0	1	0	13	47	0	0	0	49	0
2579	2-Jan-22	12:50:00	1	0	1	0	CT	0	1	0	5	23	0	0	34	6	5	37	0	0	32	12	44	0	52	0	0	0	0	6	34	0	22	0	6	26	5	11	0	18	0
2580	2-Jan-22	12:55:00	1	0	1	0	CT	0	1	0	8	4	16	0	0	2	54	61	0	0	5	5	35	0	42	0	0	0	3	0	22	0	58	0	16	11	23	0	1	4	0
2581	2-Jan-22	13:00:00	1	0	1	0	CT	0	1	0	9	0	3	2	2	0	40	31	2	0	0	2	20	0	2	0	13	5	2	0	0	0	0	0	7	24	0	1	5	0	0
2582	2-Jan-22	13:05:00	1	0	1	0	CT	0	1	0	0	40	0	57	14	1	0	0	23	0	0	67	14	0	0	0	88	12	2	4	0	0	0	0	6	9	28	14	22	0	0
2583	2-Jan-22	13:10:00	1	0	1	0	CT	0	1	63	0	74	2	58	7	0	0	0	96	2	4	0	18	0	0	0	35	20	0	9	0	0	0	0	17	17	65	5	12	0	0
2584	2-Jan-22	13:15:00	1	0	1	0	CT	0	1	17	0	38	1	59	10	0	0	0	48	9	0	11	38	0	0	0	6	50	2	30	0	0	0	0	11	48	22	4	1	0	33
2585	2-Jan-22	13:20:00	1	0	1	0	CT	0	1	0	35	46	6	41	5	0	60	0	20	13	0	25	59	0	0	0	3	21	0	21	0	0	0	0	12	33	0	6	0	0	3
2586	2-Jan-22	13:25:00	1	0	1	0	CT	0	1	0	17	66	12	0	10	0	21	0	17	0	4	26	58	0	0	0	0	0	0	73	0	0	0	0	14	24	0	51	0	0	4
2587	2-Jan-22	13:30:00	1	0	1	0	CT	0	1	0	20	28	5	0	10	0	0	0	24	0	10	36	35	0	0	0	3	0	0	62	0	0	0	0	15	54	28	33	0	0	32
2588	2-Jan-22	13:35:00	1	0	1	0	CT	0	1	0	0	29	0	0	12	0	0	0	19	4	0	38	43	0	0	0	5	0	0	40	0	0	0	0	32	7	37	0	2	5	0
2589	2-Jan-22	13:40:00	1	0	1	0	CT	0	1	0	5	58	8	0	7	0	0	0	10	30	0	13	15	0	0	0	0	0	0	21	0	0	0	0	0	0	16	0	0	0	12
2590	2-Jan-22	13:45:00	1	0	1	0	CT	0	1	0	14	34	0	0	10	0	15	0	30	12	4	3	20	0	0	0	6	0	0	12	0	0	0	0	9	1	4	0	0	33	1
2591	2-Jan-22	13:50:00	1	0	1	0	CT	0	1	2	11	88	0	0	8	0	50	3	4	1	1	19	29	0	15	0	36	0	0	16	0	0	0	0	22	32	72	0	0	12	13
2592	2-Jan-22	13:55:00	1	0	1	0	CT	0	1	2	16	51	0	0	21	8	79	0	0	25	63	36	19	0	1	0	5	0	6	32	20	0	0	0	9	4	32	9	0	17	15
2593	2-Jan-22	14:00:00	1	0	1	0	CT	0	1	0	0	25	0	0	20	11	0	0	0	0	5	0	15	0	26	0	18	0	30	76	50	0	0	0	42	0	36	0	0	38	11
2594	2-Jan-22	14:05:00	1	0	1	0	CT	0	1	0	28	48	22	0	11	48	0	0	0	0	13	9	20	0	69	0	6	0	30	15	36	0	0	0	52	43	12	0	0	21	1
2595	2-Jan-22	14:10:00	1	0	1	0	CT	0	1	2	42	52	3	0	15	23	0	8	0	0	50	30	33	0	40	0	0	16	20	25	29	0	0	0	37	25	0	0	2	41	7
2596	2-Jan-22	14:15:00	1	0	1	0	CT	0	1	0	27	0	0	0	20	42	0	1	0	0	0	50	25	0	33	0	0	11	19	20	6	0	0	0	27	0	10	0	0	20	0
2597	2-Jan-22	14:20:00	1	0	1	0	CT	0	1	7	2	2	3	0	8	38	0	0	0	12	0	31	16	0	3	0	1	7	26	21	37	0	14	0	44	14	24	0	0	23	0
2598	2-Jan-22	14:25:00	1	0	1	0	CT	0	1	2	0	0	28	0	16	27	0	0	0	0	0	31	16	0	29	0	1	46	16	28	0	0	0	0	57	49	22	0	0	25	21
2599	2-Jan-22	14:30:00	1	0	1	0	CT	0	1	0	0	0	64	0	14	37	0	0	0	14	14	28	31	0	13	0	7	55	13	30	0	0	0	0	25	0	40	0	0	6	35
2600	2-Jan-22	14:35:00	1	0	1	0	CT	0	1	0	0	20	20	0	13	42	3	0	0	2	8	19	40	0	0	0	17	23	17	13	0	0	0	0	26	0	19	0	0	13	14
2601	2-Jan-22	14:40:00	1	0	1	0	CT	0	1	0	0	1	0	0	9	21	45	0	8	7	1	48	21	0	0	0	29	0	14	31	63	0	0	0	73	29	18	35	3	0	1
2602	2-Jan-22	14:45:00	1	0	1	0	CT	0	1	0	0	0	0	0	15	9	24	3	0	0	0	32	27	0	0	0	23	0	5	34	1	0	0	0	63	4	23	31	17	9	4
2603	2-Jan-22	14:50:00	1	0	1	0	CT	0	1	5	0	0	0	0	10	32	69	0	0	0	0	15	24	0	0	0	23	0	1	25	0	0	0	0	42	1	4	24	5	1	0
2604	2-Jan-22	14:55:00	1	0	1	0	CT	0	1	0	4	1	0	0	7	28	30	0	0	0	0	18	10	0	0	0	34	0	0	33	0	0	3	0	20	0	7	40	0	0	0
2605	2-Jan-22	15:00:00	1	0	1	0	CT	0	1	0	20	10	0	5	3	12	0	0	0	0	1	35	25	0	0	0	5	0	37	35	13	0	26	0	6	0	10	29	7	0	0
2606	2-Jan-22	15:05:00	1	0	1	0	CT	0	1	0	23	51	0	0	8	18	0	0	0	0	0	45	41	0	8	0	8	0	31	20	1	0	0	0	8	0	32	40	34	0	0
2607	2-Jan-22	15:10:00	1	0	1	0	CT	0	1	0	22	69	3	0	19	11	0	0	0	0	0	28	26	0	16	0	15	0	18	28	0	0	2	0	13	0	16	18	32	0	0
2608	2-Jan-22	15:15:00	1	0	1	0	CT	0	1	42	9	55	2	0	9	11	27	0	0	0	0	24	37	0	63	0	0	0	50	15	0	0	0	0	37	0	16	26	46	0	0
2609	2-Jan-22	15:20:00	1	0	1	0	CT	0	1	61	9	38	19	0	44	0	45	0	0	0	0	13	47	0	28	0	3	12	27	11	0	0	0	0	22	0	30	0	13	0	0
2610	2-Jan-22	15:25:00	1	0	1	0	CT	0	1	27	0	56	0	1	17	0	54	1	0	0	0	48	25	0	39	0	4	29	15	5	0	0	0	0	31	0	30	33	0	0	4
2611	2-Jan-22	15:30:00	1	0	1	0	CT	0	1	0	0	30	0	4	19	0	22	47	0	0	55	23	42	0	41	0	0	31	11	7	0	0	0	0	17	0	37	30	0	19	0
2612	2-Jan-22	15:35:00	1	0	1	0	CT	0	1	0	0	0	0	53	11	0	28	55	0	3	0	14	23	0	25	0	0	53	28	43	15	0	3	0	84	0	7	0	0	30	4
2613	2-Jan-22	15:40:00	1	0	1	0	CT	0	1	0	0	1	14	71	20	0	0	76	0	9	4	14	3	0	10	0	0	28	25	45	15	0	43	0	39	0	40	0	0	49	9
2614	2-Jan-22	15:45:00	1	0	1	0	CT	0	1	0	0	1	24	7	13	0	0	12	0	37	26	34	18	0	15	0	2	42	2	23	0	0	0	0	69	0	6	14	0	16	30
2615	2-Jan-22	15:50:00	1	0	1	0	CT	0	1	0	0	0	7	0	28	0	0	0	2	35	0	33	48	0	37	0	0	9	10	12	0	0	0	0	19	1	28	76	0	47	10
2616	2-Jan-22	15:55:00	1	0	1	0	CT	0	1	0	0	0	30	0	15	0	0	1	53	26	0	31	49	0	36	0	0	0	14	62	0	0	0	0	34	55	38	18	0	38	0
2617	2-Jan-22	16:00:00	1	0	1	0	CT	0	1	0	0	0	3	0	13	0	0	30	51	4	0	22	35	0	33	0	0	0	16	25	0	0	0	0	5	45	24	20	0	16	6
2618	2-Jan-22	16:05:00	1	0	1	0	CT	0	0	24	0	0	0	1	0	0	17	7	5	0	0	2	0	0	0	0	0	0	1	0	0	0	1	0	0	16	0	6	0	19	0
2619	2-Jan-22	16:10:00	1	0	1	0	CT	0	0	0	0	0	0	0	0	0	0	1	1	0	2	0	0	0	0	0	0	8	0	0	0	0	0	0	0	0	0	0	0	0	3
2620	2-Jan-22	16:15:00	1	0	1	0	CT	0	0	5	0	0	0	4	4	0	25	0	11	0	0	0	0	0	0	0	0	0	0	0	17	0	0	0	0	0	0	0	3	0	0
2621	2-Jan-22	16:20:00	1	0	1	0	CT	0	0	16	0	0	0	12	0	0	0	1	4	0	0	0	0	0	12	0	0	0	0	0	99	0	0	0	0	0	0	0	0	0	0
2622	2-Jan-22	16:25:00	1	0	1	0	CT	0	0	0	0	1	0	67	0	0	0	0	0	0	0	0	0	0	12	0	0	0	0	0	55	0	0	0	0	0	0	0	0	0	0
2623	2-Jan-22	16:30:00	1	0	1	0	CT	0	0	2	0	0	0	26	0	0	0	0	0	0	0	0	0	0	2	0	36	0	0	0	67	0	0	0	0	8	0	0	0	0	0
2624	2-Jan-22	16:35:00	1	0	1	0	CT	0	0	32	0	8	0	0	0	4	3	0	1	0	0	0	0	0	3	0	15	0	0	0	18	0	0	0	0	0	0	1	0	0	0
2625	2-Jan-22	16:40:00	1	0	1	0	CT	0	0	0	0	63	0	0	0	0	0	0	0	0	0	0	0	0	2	0	29	0	0	1	28	0	0	0	0	0	0	0	0	0	0
2626	2-Jan-22	16:45:00	1	0	1	0	CT	0	0	1	0	33	1	10	0	0	0	0	4	0	0	0	0	0	0	0	51	20	0	0	72	0	0	0	0	0	0	1	0	0	0
2627	2-Jan-22	16:50:00	1	0	1	0	CT	0	0	0	0	26	6	76	0	0	0	0	0	0	0	0	0	0	0	0	4	0	0	0	30	0	0	0	0	5	0	0	0	0	17
2628	2-Jan-22	16:55:00	1	0	1	0	CT	0	0	48	0	0	7	30	0	0	0	0	0	0	0	0	0	0	0	0	19	0	0	0	22	0	0	0	0	0	0	9	0	0	33
2629	2-Jan-22	17:00:00	1	0	1	0	CT	0	0	10	0	0	0	44	0	0	0	0	6	0	9	0	0	0	22	0	26	0	0	1	13	0	17	0	0	0	0	36	0	0	34
2630	2-Jan-22	17:05:00	1	0	1	0	CT	0	0	22	0	0	10	16	0	0	0	0	2	11	0	0	0	0	0	0	40	16	0	0	51	0	0	0	0	0	0	69	0	0	0
2631	2-Jan-22	17:10:00	1	0	1	0	CT	0	0	10	0	0	0	2	5	2	0	0	0	0	20	0	0	0	0	0	2	23	0	0	34	0	0	0	0	0	0	31	0	13	0
2632	2-Jan-22	17:15:00	1	0	1	0	CT	0	0	26	6	0	0	0	1	3	1	0	0	0	63	0	0	0	0	0	23	3	0	0	30	0	0	0	0	0	0	5	0	11	0
2633	2-Jan-22	17:20:00	1	0	1	0	CT	0	0	0	10	0	5	0	0	0	0	0	0	0	41	0	0	0	0	0	0	0	0	0	0	0	0	0	0	0	0	0	1	20	10
2634	2-Jan-22	17:25:00	1	0	1	0	CT	0	0	0	31	0	16	0	33	2	0	0	0	0	64	0	0	0	0	0	0	0	0	0	1	0	0	0	0	0	0	0	6	0	0
2635	2-Jan-22	17:30:00	1	0	1	0	CT	0	0	0	21	1	3	0	11	0	0	0	0	4	30	0	0	0	0	0	0	0	0	0	0	0	3	0	0	0	0	0	2	0	0
2636	2-Jan-22	17:35:00	1	0	1	0	CT	0	0	0	11	0	0	0	0	0	0	0	0	1	0	0	0	0	3	0	0	0	0	2	0	0	0	0	0	0	0	16	7	0	0
2637	2-Jan-22	17:40:00	1	0	1	0	CT	0	0	0	36	1	0	0	3	4	0	0	0	0	0	0	0	0	6	0	0	28	2	44	0	0	0	0	0	35	0	2	11	0	24
2638	2-Jan-22	17:45:00	1	0	1	0	CT	0	0	0	33	0	0	0	0	11	0	21	0	0	0	0	0	0	6	0	0	0	6	0	0	0	3	0	0	6	37	4	36	0	0
2639	2-Jan-22	17:50:00	1	0	1	0	CT	0	0	0	1	1	0	0	1	7	0	8	0	0	0	0	1	0	34	0	0	0	0	0	0	0	3	0	0	0	0	6	0	0	0
2640	2-Jan-22	17:55:00	1	0	1	0	CT	0	0	0	5	0	0	0	0	0	0	34	0	0	0	0	0	0	48	0	8	0	0	0	0	0	0	0	0	0	0	0	0	0	0
2641	2-Jan-22	18:00:00	1	0	1	0	CT	0	0	0	12	0	25	0	0	0	3	10	0	0	0	0	0	0	10	0	0	0	0	0	0	0	2	0	0	0	0	0	30	0	0
2642	2-Jan-22	18:05:00	1	0	1	0	CT	0	0	15	7	1	10	0	1	0	1	2	0	0	0	0	0	0	0	0	0	8	2	0	0	0	20	0	0	0	0	0	0	0	4
2643	2-Jan-22	18:10:00	1	0	1	0	CT	0	0	34	0	52	13	0	0	2	0	0	0	0	48	0	0	0	0	0	0	10	8	0	0	0	29	0	0	51	0	0	0	0	0
2644	2-Jan-22	18:15:00	1	0	1	0	CT	0	0	34	0	63	23	0	0	1	0	0	0	0	0	0	0	0	0	0	0	0	0	0	0	0	42	0	0	52	0	39	0	0	0
2645	2-Jan-22	18:20:00	1	0	1	0	CT	0	0	0	19	50	0	0	0	0	9	0	0	0	0	0	3	0	8	0	0	0	2	0	0	0	33	0	0	97	0	37	0	0	0
2646	2-Jan-22	18:25:00	1	0	1	0	CT	0	0	0	42	10	1	0	0	1	1	0	0	6	0	0	0	0	37	0	0	1	0	0	0	0	84	0	0	63	0	33	0	40	0
2647	2-Jan-22	18:30:00	1	0	1	0	CT	0	0	0	24	58	0	0	0	0	0	0	0	0	0	0	0	0	38	0	39	1	3	25	12	0	11	0	0	0	0	22	0	28	0
2648	2-Jan-22	18:35:00	1	0	1	0	CT	0	0	0	35	37	13	0	0	0	0	0	0	0	0	1	0	0	15	0	50	4	0	10	0	0	81	0	0	0	33	30	0	22	0
2649	2-Jan-22	18:40:00	1	0	1	0	CT	0	0	0	0	0	19	14	0	0	0	0	0	0	0	11	0	0	0	0	30	7	59	0	8	0	65	0	0	0	18	60	0	0	35
2650	2-Jan-22	18:45:00	1	0	1	0	CT	0	0	0	1	0	14	51	10	0	0	0	15	0	0	68	0	0	0	0	9	8	0	0	7	0	42	0	0	0	16	25	0	0	24
2651	2-Jan-22	18:50:00	1	0	1	0	CT	0	0	0	0	0	0	30	5	0	0	0	14	3	0	33	1	0	0	0	24	8	0	0	0	0	0	0	0	0	6	24	0	0	0
2652	2-Jan-22	18:55:00	1	0	1	0	CT	0	0	49	4	39	0	2	0	1	1	0	6	7	0	7	3	0	0	0	0	4	1	0	0	0	0	0	0	0	1	17	0	0	1
2653	2-Jan-22	19:00:00	1	0	1	0	CT	0	0	51	41	85	0	0	0	0	0	0	7	0	0	44	1	0	0	0	3	0	0	0	58	0	0	0	4	0	13	13	0	0	4
2654	2-Jan-22	19:05:00	1	0	1	0	CT	0	0	3	42	67	0	4	0	0	1	0	7	0	0	55	0	0	0	0	0	1	0	1	71	0	0	0	41	0	1	0	0	0	12
2655	2-Jan-22	19:10:00	1	0	1	0	CT	0	0	0	21	83	0	0	0	0	0	0	26	0	0	58	1	0	0	0	0	34	0	0	31	0	0	0	0	0	0	0	3	0	1
2656	2-Jan-22	19:15:00	1	0	1	0	CT	0	0	4	34	42	0	0	0	19	0	0	49	0	0	18	0	0	0	0	0	25	0	7	68	0	0	0	0	0	0	0	45	0	0
2657	2-Jan-22	19:20:00	1	0	1	0	CT	0	0	44	32	55	0	1	0	7	0	0	41	0	0	45	0	0	0	0	3	4	1	23	2	0	30	0	0	0	0	0	7	0	1
2658	2-Jan-22	19:25:00	1	0	1	0	CT	0	0	32	42	30	9	0	0	38	0	0	13	1	0	28	2	0	0	0	63	15	1	54	13	0	0	0	0	3	0	25	0	0	2
2659	2-Jan-22	19:30:00	1	0	1	0	CT	0	0	67	9	52	0	1	0	83	0	0	31	0	0	17	0	0	12	0	29	0	1	25	23	0	0	0	0	0	0	40	0	0	0
2660	2-Jan-22	19:35:00	1	0	1	0	CT	0	0	0	0	19	0	0	0	42	0	0	27	10	0	33	0	0	0	0	9	0	37	0	0	0	26	0	0	0	0	0	0	30	38
2661	2-Jan-22	19:40:00	1	0	1	0	CT	0	0	0	0	14	14	1	9	72	0	8	0	25	0	12	1	0	5	0	0	0	0	0	0	0	0	0	0	0	0	0	0	0	1
2662	2-Jan-22	19:45:00	1	0	1	0	CT	0	0	0	0	39	0	0	32	35	0	20	0	0	0	0	4	0	30	0	29	0	0	27	0	0	0	0	0	0	0	2	57	16	8
2663	2-Jan-22	19:50:00	1	0	1	0	CT	0	0	0	0	63	0	0	21	63	19	11	0	0	0	0	0	0	42	0	0	5	20	53	0	0	0	0	0	0	0	16	6	33	5
2664	2-Jan-22	19:55:00	1	0	1	0	CT	0	0	0	0	14	0	0	6	55	51	4	0	0	0	0	1	0	28	0	0	8	43	42	22	0	0	0	0	0	0	14	0	8	0
2665	2-Jan-22	20:00:00	1	0	1	0	CT	0	0	0	0	0	3	0	51	20	42	0	0	0	0	0	0	0	63	0	0	0	36	0	2	0	0	0	0	0	0	9	0	21	2
2666	2-Jan-22	20:05:00	1	0	1	0	CT	0	0	0	0	37	0	0	27	1	67	0	0	4	0	0	0	0	19	0	44	0	0	0	0	0	0	0	0	1	0	0	0	0	22
2667	2-Jan-22	20:10:00	1	0	1	0	CT	0	0	0	0	0	0	0	0	0	57	0	4	0	0	0	0	0	0	0	69	0	0	0	0	0	0	0	0	0	21	76	15	0	0
2668	2-Jan-22	20:15:00	1	0	1	0	CT	0	0	0	0	0	0	0	4	0	44	0	0	0	21	0	0	0	0	0	9	1	0	0	0	0	0	0	0	0	16	71	0	0	0
2669	2-Jan-22	20:20:00	1	0	1	0	CT	0	0	0	0	0	0	13	0	1	0	0	0	5	3	0	0	0	0	0	0	0	0	0	0	0	28	0	0	3	56	37	0	0	0
2670	2-Jan-22	20:25:00	1	0	1	0	CT	0	0	0	0	5	36	14	0	26	23	0	0	1	0	0	0	0	0	0	0	0	0	0	0	0	0	0	0	50	46	14	6	0	0
2671	2-Jan-22	20:30:00	1	0	1	0	CT	0	0	0	0	50	0	21	0	0	12	0	0	0	0	0	0	0	0	0	0	12	0	0	0	0	0	0	4	50	19	4	0	0	0
2672	2-Jan-22	20:35:00	1	0	1	0	CT	0	0	9	0	39	9	70	0	0	0	0	0	0	0	0	42	0	0	0	37	6	12	0	0	0	0	0	20	0	31	15	1	9	55
2673	2-Jan-22	20:40:00	1	0	1	0	CT	0	0	6	0	28	9	57	0	0	0	0	0	0	0	0	50	0	0	0	25	0	73	0	3	0	0	0	13	0	0	22	0	23	0
2674	2-Jan-22	20:45:00	1	0	1	0	CT	0	0	0	0	33	22	30	4	2	0	0	0	0	0	0	64	0	0	0	0	0	53	0	25	0	0	0	0	0	0	2	0	25	0
2675	2-Jan-22	20:50:00	1	0	1	0	CT	0	0	1	0	0	0	9	0	0	0	73	2	1	0	0	36	0	0	0	0	0	13	0	15	0	0	0	0	0	0	30	0	13	5
2676	2-Jan-22	20:55:00	1	0	1	0	CT	0	0	1	0	5	0	0	0	56	11	0	0	0	0	0	4	0	0	0	0	0	27	0	0	0	0	0	63	0	0	84	1	0	12
2677	2-Jan-22	21:00:00	1	0	1	0	CT	0	0	0	0	6	0	0	0	4	32	2	1	0	0	1	0	0	0	0	0	7	13	0	8	0	0	0	9	12	0	68	16	0	8
2678	2-Jan-22	21:05:00	1	0	1	0	CT	0	0	22	0	0	0	0	0	0	10	46	0	0	0	65	0	0	0	0	0	0	0	10	15	0	0	0	0	0	0	82	0	0	1
2679	2-Jan-22	21:10:00	1	0	1	0	CT	0	0	3	0	0	8	0	0	0	13	57	2	0	0	24	0	0	0	0	0	1	0	63	24	0	0	0	18	0	16	37	0	0	2
2680	2-Jan-22	21:15:00	1	0	1	0	CT	0	0	67	0	36	0	0	0	0	0	0	1	0	4	57	0	0	0	0	13	15	0	63	0	0	0	0	11	0	83	0	0	6	28
2681	2-Jan-22	21:20:00	1	0	1	0	CT	0	0	0	0	85	23	0	0	0	0	0	1	0	15	19	0	0	19	0	74	0	0	10	0	0	0	0	0	6	29	2	0	7	4
2682	2-Jan-22	21:25:00	1	0	1	0	CT	0	0	0	0	66	0	0	10	0	0	0	0	0	58	0	0	0	41	0	51	0	0	13	0	0	0	0	0	32	0	0	0	9	2
2683	2-Jan-22	21:30:00	1	0	1	0	CT	0	0	0	0	64	0	0	18	0	3	0	0	0	41	0	0	0	0	0	27	11	0	1	2	0	0	0	0	0	0	0	0	2	0
2684	2-Jan-22	21:35:00	1	0	1	0	CT	0	0	0	0	19	0	49	1	0	0	0	0	0	0	0	0	0	0	0	40	24	0	0	0	0	0	0	0	2	0	12	0	0	6
2685	2-Jan-22	21:40:00	1	0	1	0	CT	0	0	0	0	38	0	64	3	0	29	0	0	6	0	0	0	0	0	0	47	49	0	0	15	0	0	0	0	1	0	63	0	0	6
2686	2-Jan-22	21:45:00	1	0	1	0	CT	0	0	0	0	41	15	32	0	0	0	0	0	7	0	0	0	0	13	0	22	3	0	0	9	0	0	0	11	11	0	32	0	0	25
2687	2-Jan-22	21:50:00	1	0	1	0	CT	0	0	0	0	34	17	51	49	4	17	0	0	39	0	0	0	0	55	0	28	0	0	1	25	0	0	0	0	18	0	1	0	0	0
2688	2-Jan-22	21:55:00	1	0	1	0	CT	0	0	0	0	22	0	29	0	64	0	0	0	18	0	0	0	0	41	0	9	0	0	0	69	0	0	0	10	19	0	0	0	4	0
2689	2-Jan-22	22:00:00	1	0	1	0	CT	0	0	16	13	21	0	18	0	32	0	0	31	43	11	0	0	0	12	0	3	0	0	0	36	0	0	0	0	33	0	0	0	0	17
2690	2-Jan-22	22:05:00	1	0	1	0	CT	0	0	18	14	32	0	13	0	53	0	0	43	60	31	0	26	0	6	0	4	0	0	0	24	0	0	0	16	73	30	0	0	0	9
2691	2-Jan-22	22:10:00	1	0	1	0	CT	0	0	0	29	4	0	0	0	19	0	0	10	39	17	0	55	0	2	0	54	27	0	0	14	0	0	0	44	56	66	0	12	30	38
2692	2-Jan-22	22:15:00	1	0	1	0	CT	0	0	0	11	0	0	0	0	17	0	0	0	5	6	0	40	0	0	0	59	7	0	3	83	0	2	0	20	0	37	0	0	4	10
2693	2-Jan-22	22:20:00	1	0	1	0	CT	0	0	23	0	0	0	0	0	3	16	0	0	16	2	0	2	0	0	0	14	0	0	75	25	0	0	0	30	0	1	0	0	0	3
2694	2-Jan-22	22:25:00	1	0	1	0	CT	0	0	4	2	0	0	0	0	0	44	34	0	1	1	0	18	0	5	0	65	0	0	61	0	0	20	0	16	10	4	0	0	1	1
2695	2-Jan-22	22:30:00	1	0	1	0	CT	0	0	0	14	42	3	0	0	0	5	64	16	0	0	0	0	0	6	0	42	0	0	45	22	0	7	0	28	0	45	0	0	32	3
2696	2-Jan-22	22:35:00	1	0	1	0	CT	0	0	0	1	63	0	0	0	0	20	25	0	0	2	0	2	0	1	0	2	0	28	45	0	0	0	0	9	0	22	0	0	0	4
[truncated: 592 more rows]
