# Supplementary material for: A Simulated Shift Work Schedule Does Not Increase DNA Double-Strand Break Repair by NHEJ in the Drosophila Rr3 System
Source: Genes (Basel). 2022 Jan 15;13(1):150. doi: 10.3390/genes13010150 (PMC8774994; doi:10.3390/genes13010150)
Supplement: Supplementary file 1 [file genes-13-00150-s001.zip › Table S2.csv]

440	31-Oct-21	0:00:00	1	0	1	0	CT	0	0	0	0	0	0	0	0	0	0	0	0	0	0	0	0	0	0	0	0	1	0	0	0	0	0	0	0	0	0	0	0	31	1
441	31-Oct-21	0:05:00	1	0	1	0	CT	0	0	0	0	0	0	0	0	0	0	0	0	0	0	0	0	0	0	0	0	46	0	0	0	0	0	2	0	0	0	0	0	0	0
442	31-Oct-21	0:10:00	1	0	1	0	CT	0	0	0	0	0	0	0	0	0	31	0	6	0	0	0	0	0	0	0	0	13	0	0	0	0	0	0	0	2	0	0	0	0	0
443	31-Oct-21	0:15:00	1	0	1	0	CT	0	0	0	0	0	0	0	0	0	23	0	1	0	0	0	0	0	0	0	0	0	0	0	0	0	0	0	0	0	0	0	0	0	0
444	31-Oct-21	0:20:00	1	0	1	0	CT	0	0	0	0	0	1	0	0	0	46	0	0	0	0	0	18	0	0	0	0	0	0	0	0	0	0	0	0	0	0	0	0	0	1
445	31-Oct-21	0:25:00	1	0	1	0	CT	0	0	0	0	0	9	0	0	0	0	0	0	0	0	0	0	0	0	0	0	0	0	0	0	0	0	0	0	0	0	0	0	0	4
446	31-Oct-21	0:30:00	1	0	1	0	CT	0	0	0	0	0	0	0	0	0	0	0	0	0	0	0	0	0	0	0	0	0	0	0	0	0	0	0	0	0	0	0	0	0	5
447	31-Oct-21	0:35:00	1	0	1	0	CT	0	0	0	0	0	0	0	0	1	0	0	0	0	0	0	0	0	0	0	0	0	0	0	0	0	0	0	0	3	0	0	0	0	0
448	31-Oct-21	0:40:00	1	0	1	0	CT	0	0	0	0	0	0	0	0	0	0	0	0	0	0	0	0	0	0	0	0	0	0	0	0	0	10	25	0	0	0	0	0	0	0
449	31-Oct-21	0:45:00	1	0	1	0	CT	0	0	0	0	0	0	0	0	0	0	0	0	0	0	0	0	0	0	0	0	0	0	0	0	0	0	44	0	0	0	0	0	0	0
450	31-Oct-21	0:50:00	1	0	1	0	CT	0	0	0	0	0	0	0	0	0	0	0	0	0	0	0	0	0	0	0	0	0	0	0	0	0	0	0	0	0	0	0	0	0	0
451	31-Oct-21	0:55:00	1	0	1	0	CT	0	0	0	0	0	0	0	0	0	0	0	0	0	0	0	0	0	0	0	0	0	0	0	0	3	0	0	0	0	0	3	0	0	0
452	31-Oct-21	1:00:00	1	0	1	0	CT	0	0	0	0	0	0	0	0	0	0	0	0	0	0	0	0	0	0	0	0	0	0	0	0	0	0	0	0	0	0	1	0	0	1
453	31-Oct-21	1:05:00	1	0	1	0	CT	0	0	0	0	0	0	0	0	0	48	0	1	0	0	0	0	0	0	0	0	0	0	0	0	0	0	0	0	0	0	0	0	0	23
454	31-Oct-21	1:10:00	1	0	1	0	CT	0	0	0	0	0	0	0	0	0	21	0	0	0	0	0	0	0	0	0	0	0	0	0	0	0	0	0	0	0	0	0	0	0	31
455	31-Oct-21	1:15:00	1	0	1	0	CT	0	0	0	0	0	0	0	0	0	0	0	32	0	0	0	0	0	0	0	0	2	0	0	0	0	0	0	0	0	0	0	0	88	0
456	31-Oct-21	1:20:00	1	0	1	0	CT	0	0	0	0	0	0	0	0	0	0	0	1	0	0	0	0	0	0	0	0	0	0	0	0	0	0	0	0	0	0	0	0	1	0
457	31-Oct-21	1:25:00	1	0	1	0	CT	0	0	0	0	0	0	0	0	0	0	0	0	1	0	11	0	0	0	0	0	0	0	0	0	0	0	0	0	0	0	0	0	0	0
458	31-Oct-21	1:30:00	1	0	1	0	CT	0	0	0	0	0	0	0	0	0	0	0	0	0	0	0	0	0	0	0	0	0	0	0	0	0	0	0	0	0	0	0	0	0	0
459	31-Oct-21	1:35:00	1	0	1	0	CT	0	0	0	0	0	0	0	0	0	0	0	0	0	0	0	0	0	0	0	0	0	0	0	0	0	0	0	0	0	0	0	0	0	0
460	31-Oct-21	1:40:00	1	0	1	0	CT	0	0	0	0	0	0	0	0	0	0	0	0	0	0	0	0	0	0	0	0	13	0	0	0	1	6	21	0	0	0	0	0	0	0
461	31-Oct-21	1:45:00	1	0	1	0	CT	0	0	0	0	0	0	0	0	0	0	0	8	0	0	0	0	0	0	0	0	6	0	0	0	0	0	1	0	0	0	0	0	0	0
462	31-Oct-21	1:50:00	1	0	1	0	CT	0	0	0	0	0	0	0	0	0	0	0	0	0	0	0	0	0	29	0	0	0	0	0	0	0	0	0	0	0	0	0	0	0	0
463	31-Oct-21	1:55:00	1	0	1	0	CT	0	0	0	0	24	0	0	48	0	0	0	0	0	0	0	0	0	0	0	0	0	0	0	0	0	0	0	0	0	0	0	0	0	0
464	31-Oct-21	2:00:00	1	0	1	0	CT	0	0	0	0	21	0	0	59	0	0	0	0	0	0	0	0	0	0	0	0	0	0	0	0	53	0	0	0	0	0	0	0	0	0
465	31-Oct-21	2:05:00	1	0	1	0	CT	0	0	0	0	0	0	0	81	0	0	0	0	0	0	0	0	0	0	0	0	0	0	0	0	86	0	0	0	0	0	0	0	0	0
466	31-Oct-21	2:10:00	1	0	1	0	CT	0	0	0	0	0	0	0	67	0	0	0	0	0	0	0	0	0	0	0	0	0	0	0	0	96	0	0	0	0	0	0	0	0	0
467	31-Oct-21	2:15:00	1	0	1	0	CT	0	0	0	0	0	8	0	48	0	0	0	0	0	0	0	0	0	0	0	0	0	0	0	0	0	0	0	0	0	0	0	0	0	0
468	31-Oct-21	2:20:00	1	0	1	0	CT	0	0	0	0	0	26	0	13	0	0	0	0	0	0	0	7	0	0	11	0	0	0	0	0	0	0	0	0	0	0	0	0	0	0
469	31-Oct-21	2:25:00	1	0	1	0	CT	0	0	0	0	0	0	0	0	0	0	0	0	0	0	0	0	0	0	13	0	0	0	0	0	0	0	0	0	0	0	0	0	0	0
470	31-Oct-21	2:30:00	1	0	1	0	CT	0	0	0	0	0	0	0	0	0	0	0	0	0	0	0	0	0	0	0	0	0	0	0	0	0	0	0	0	0	0	0	0	0	0
471	31-Oct-21	2:35:00	1	0	1	0	CT	0	0	1	0	0	0	0	1	0	0	0	0	0	0	0	0	0	0	0	0	0	0	0	0	0	0	0	8	0	0	0	0	0	0
472	31-Oct-21	2:40:00	1	0	1	0	CT	0	0	0	0	0	0	0	12	0	5	0	0	0	0	0	0	0	4	0	0	1	0	0	0	0	0	0	42	0	0	0	0	0	1
473	31-Oct-21	2:45:00	1	0	1	0	CT	0	0	0	0	0	0	0	0	0	21	0	0	0	1	0	0	0	38	43	0	0	0	0	0	0	0	0	88	0	0	0	0	0	85
474	31-Oct-21	2:50:00	1	0	1	0	CT	0	0	0	0	0	0	0	0	0	3	0	0	0	74	0	0	0	0	0	0	0	0	0	0	0	0	0	47	10	0	0	0	0	1
475	31-Oct-21	2:55:00	1	0	1	0	CT	0	0	0	0	0	0	0	0	0	4	0	0	0	6	0	0	0	0	0	0	0	0	0	0	0	0	0	45	0	0	0	0	0	12
476	31-Oct-21	3:00:00	1	0	1	0	CT	0	0	0	0	5	0	0	0	0	36	0	0	0	0	0	0	0	0	0	0	0	0	0	0	0	0	0	65	0	0	0	0	0	13
477	31-Oct-21	3:05:00	1	0	1	0	CT	0	0	0	0	0	0	0	0	0	77	0	12	0	0	0	0	0	0	62	0	0	0	0	0	0	0	18	58	0	0	0	0	0	0
478	31-Oct-21	3:10:00	1	0	1	0	CT	0	0	0	0	0	0	0	1	0	39	0	29	0	0	0	0	0	0	2	0	0	0	0	0	63	0	17	4	0	0	0	0	0	0
479	31-Oct-21	3:15:00	1	0	1	0	CT	0	0	0	0	0	0	0	0	0	41	0	0	0	0	0	0	0	0	1	0	0	0	0	0	0	0	0	0	0	0	0	0	0	0
480	31-Oct-21	3:20:00	1	0	1	0	CT	0	0	0	0	0	0	0	0	0	0	0	0	0	0	0	0	0	0	0	0	0	0	0	0	0	0	0	0	0	0	0	0	0	0
481	31-Oct-21	3:25:00	1	0	1	0	CT	0	0	0	0	0	0	0	0	0	0	0	0	0	0	0	0	0	1	1	0	8	0	0	0	0	0	0	0	0	0	0	0	1	0
482	31-Oct-21	3:30:00	1	0	1	0	CT	0	0	0	0	0	0	0	0	0	0	0	0	0	0	0	0	0	0	0	0	26	0	0	0	0	0	0	0	0	0	0	0	1	0
483	31-Oct-21	3:35:00	1	0	1	0	CT	0	0	0	0	0	0	0	0	0	0	0	0	0	0	0	0	0	0	1	0	0	0	0	0	0	0	0	58	0	0	0	0	0	0
484	31-Oct-21	3:40:00	1	0	1	0	CT	0	0	0	0	0	0	0	0	0	0	0	0	0	0	0	0	0	0	0	0	3	0	0	0	0	0	0	0	0	0	0	0	0	0
485	31-Oct-21	3:45:00	1	0	1	0	CT	0	0	0	0	0	0	0	0	0	0	0	0	0	0	0	0	0	0	1	0	80	0	0	9	0	0	0	0	0	0	0	0	0	0
486	31-Oct-21	3:50:00	1	0	1	0	CT	0	0	0	0	0	0	0	8	0	0	0	0	0	0	0	0	0	0	0	0	96	0	9	10	0	0	0	0	0	31	0	0	0	0
487	31-Oct-21	3:55:00	1	0	1	0	CT	0	0	0	0	0	0	0	0	0	0	0	0	0	0	0	0	0	0	0	0	67	0	0	0	0	0	0	0	0	106	0	0	0	0
488	31-Oct-21	4:00:00	1	0	1	0	CT	0	0	0	0	0	0	0	0	0	0	0	0	0	0	0	0	0	0	0	0	72	0	3	0	0	0	0	0	0	89	0	0	0	0
489	31-Oct-21	4:05:00	1	0	1	0	CT	0	0	0	0	2	0	0	0	0	0	0	0	0	0	0	0	0	0	43	0	71	0	0	0	0	0	11	0	0	72	0	0	0	0
490	31-Oct-21	4:10:00	1	0	1	0	CT	0	0	0	0	8	0	0	0	0	0	0	1	0	0	0	0	0	0	3	0	34	0	2	0	0	0	0	0	0	69	0	0	0	0
491	31-Oct-21	4:15:00	1	0	1	0	CT	0	0	0	0	0	0	0	0	0	0	0	0	0	0	0	0	0	0	0	0	0	0	0	0	0	0	0	0	0	0	0	0	0	0
492	31-Oct-21	4:20:00	1	0	1	0	CT	0	0	0	0	0	0	0	0	0	0	0	0	0	0	0	0	0	0	0	0	0	0	0	0	0	0	0	0	0	0	0	0	0	0
493	31-Oct-21	4:25:00	1	0	1	0	CT	0	0	0	0	0	0	0	0	0	36	0	0	0	0	0	0	0	0	0	0	0	0	0	0	0	0	0	0	0	0	0	0	0	0
494	31-Oct-21	4:30:00	1	0	1	0	CT	0	0	0	0	0	0	0	0	0	34	0	0	0	0	0	0	0	0	0	0	0	0	0	0	0	0	62	0	0	0	3	0	0	0
495	31-Oct-21	4:35:00	1	0	1	0	CT	0	0	0	0	0	0	0	0	0	0	0	0	0	0	0	0	0	0	0	0	0	0	0	0	0	0	0	0	0	0	0	0	0	0
496	31-Oct-21	4:40:00	1	0	1	0	CT	0	0	0	0	0	1	0	0	0	0	0	0	0	0	0	0	0	0	0	0	0	0	0	0	0	0	0	0	0	0	0	0	0	0
497	31-Oct-21	4:45:00	1	0	1	0	CT	0	0	0	0	0	0	0	0	0	0	0	0	0	0	0	20	0	0	0	0	0	0	0	0	0	0	0	6	0	0	0	0	0	0
498	31-Oct-21	4:50:00	1	0	1	0	CT	0	0	0	0	0	0	0	0	0	0	0	0	2	0	0	57	0	0	0	0	1	0	0	0	0	0	0	0	0	0	0	0	0	0
499	31-Oct-21	4:55:00	1	0	1	0	CT	0	0	0	0	0	0	0	0	0	0	0	0	1	0	0	54	0	0	1	0	1	0	1	0	0	0	0	0	0	0	0	0	1	0
500	31-Oct-21	5:00:00	1	0	1	0	CT	0	0	0	0	4	0	0	0	0	0	0	0	0	0	0	76	0	0	0	0	0	0	0	0	0	0	0	0	0	0	0	0	124	70
501	31-Oct-21	5:05:00	1	0	1	0	CT	0	0	0	0	0	0	0	0	0	0	0	0	0	0	0	0	0	0	0	0	0	0	0	0	0	107	0	0	0	0	0	0	124	27
502	31-Oct-21	5:10:00	1	0	1	0	CT	0	0	0	0	0	0	0	0	0	0	2	0	0	0	0	0	0	0	2	0	21	0	0	0	4	84	0	0	0	0	0	0	45	0
503	31-Oct-21	5:15:00	1	0	1	0	CT	0	0	0	0	0	2	0	0	0	0	0	0	0	0	0	0	0	0	0	0	2	0	0	0	62	0	0	0	0	0	0	0	0	0
504	31-Oct-21	5:20:00	1	0	1	0	CT	0	0	0	0	0	0	0	0	0	0	0	0	0	0	0	0	0	0	28	0	0	0	0	0	84	0	0	0	0	0	0	0	0	0
505	31-Oct-21	5:25:00	1	0	1	0	CT	0	0	0	0	0	0	0	0	0	0	0	0	0	0	0	1	0	0	1	0	0	0	0	0	6	0	0	0	0	0	0	0	0	0
506	31-Oct-21	5:30:00	1	0	1	0	CT	0	0	0	0	0	0	0	0	0	0	0	0	0	0	0	0	0	0	0	0	0	0	0	0	0	0	18	1	0	0	0	0	0	0
507	31-Oct-21	5:35:00	1	0	1	0	CT	0	0	0	0	0	0	0	2	0	0	0	0	0	0	0	24	0	0	0	0	0	0	2	0	0	0	78	0	0	0	0	0	0	0
508	31-Oct-21	5:40:00	1	0	1	0	CT	0	0	0	0	0	0	0	0	0	0	0	0	0	0	0	0	0	0	0	0	0	0	0	0	0	0	61	0	0	0	0	0	5	0
509	31-Oct-21	5:45:00	1	0	1	0	CT	0	0	0	0	0	0	0	0	0	0	0	0	0	0	0	0	9	0	0	0	0	0	6	0	0	0	71	1	0	0	0	0	0	1
510	31-Oct-21	5:50:00	1	0	1	0	CT	0	0	0	0	0	0	0	0	0	0	0	0	1	0	0	0	54	0	0	0	0	0	23	0	0	0	68	0	0	0	0	0	0	93
511	31-Oct-21	5:55:00	1	0	1	0	CT	0	0	0	0	0	1	0	0	0	0	0	0	0	0	0	0	86	0	0	0	0	0	2	0	0	0	81	12	0	0	0	0	4	20
512	31-Oct-21	6:00:00	1	0	1	0	CT	0	0	0	0	0	0	0	0	0	0	0	0	3	0	0	0	98	0	0	0	0	8	0	0	0	0	72	42	0	0	0	0	0	0
513	31-Oct-21	6:05:00	1	0	1	0	CT	0	0	0	0	0	0	0	0	0	0	0	0	15	0	0	0	78	0	0	0	0	0	0	0	0	0	34	9	0	0	0	0	0	0
514	31-Oct-21	6:10:00	1	0	1	0	CT	0	0	0	0	32	0	0	0	0	0	0	0	0	0	0	0	70	0	2	0	0	1	0	0	0	0	0	0	0	0	0	0	0	0
515	31-Oct-21	6:15:00	1	0	1	0	CT	0	0	0	0	48	0	0	0	0	0	4	0	0	0	0	0	85	0	2	0	0	0	0	0	0	0	0	0	0	0	0	0	0	0
516	31-Oct-21	6:20:00	1	0	1	0	CT	0	0	0	0	82	0	0	0	0	0	82	0	0	0	0	0	66	0	0	0	0	0	0	0	0	0	0	0	0	0	0	0	0	0
517	31-Oct-21	6:25:00	1	0	1	0	CT	0	0	0	0	61	0	0	0	0	0	84	0	0	0	0	0	62	0	0	0	0	1	0	5	0	0	0	0	0	0	0	0	0	0
518	31-Oct-21	6:30:00	1	0	1	0	CT	0	0	0	0	7	0	0	0	0	0	83	0	0	0	0	3	90	0	0	0	0	0	0	5	0	0	0	0	0	0	0	0	0	0
519	31-Oct-21	6:35:00	1	0	1	0	CT	0	0	0	0	0	0	0	0	0	0	61	0	0	0	0	2	59	0	0	0	0	0	0	13	0	0	0	0	0	0	0	0	0	0
520	31-Oct-21	6:40:00	1	0	1	0	CT	0	0	0	0	0	5	0	0	0	0	0	0	0	0	0	0	0	0	0	0	2	0	0	0	0	0	0	0	0	0	0	0	0	0
521	31-Oct-21	6:45:00	1	0	1	0	CT	0	0	0	30	0	0	0	0	0	0	0	0	0	0	0	0	0	0	0	0	0	0	0	0	0	0	0	0	0	0	0	0	0	0
522	31-Oct-21	6:50:00	1	0	1	0	CT	0	0	0	47	0	0	0	34	0	0	0	0	0	0	0	0	0	0	0	0	0	0	1	0	0	0	0	0	0	0	0	0	0	0
523	31-Oct-21	6:55:00	1	0	1	0	CT	0	0	0	49	0	0	0	74	0	17	0	0	0	0	0	0	0	0	0	0	0	2	0	0	0	0	0	0	0	0	9	0	0	0
524	31-Oct-21	7:00:00	1	0	1	0	CT	0	0	0	57	0	0	0	85	0	68	0	0	0	0	0	0	0	0	29	0	0	1	9	0	0	3	1	0	0	0	0	0	0	0
525	31-Oct-21	7:05:00	1	0	1	0	CT	0	0	0	0	0	0	0	74	89	63	0	0	0	0	0	6	0	5	0	0	0	0	0	0	0	62	3	0	0	0	0	0	0	0
526	31-Oct-21	7:10:00	1	0	1	0	CT	0	0	0	0	0	0	0	55	51	32	0	0	0	68	17	0	0	33	0	0	0	0	0	0	0	94	1	0	0	0	1	0	0	0
527	31-Oct-21	7:15:00	1	0	1	0	CT	0	0	0	0	0	0	0	0	6	2	0	0	0	51	1	0	0	18	0	0	0	0	0	0	0	25	2	0	0	0	14	0	0	0
528	31-Oct-21	7:20:00	1	0	1	0	CT	0	0	0	0	0	0	70	0	0	63	0	0	0	0	0	0	0	0	0	0	0	0	0	0	0	0	4	4	0	0	0	0	0	0
529	31-Oct-21	7:25:00	1	0	1	0	CT	0	0	0	0	0	0	78	0	0	25	0	0	0	0	0	0	0	0	0	0	0	0	0	0	0	0	4	10	0	0	0	0	0	0
530	31-Oct-21	7:30:00	1	0	1	0	CT	0	0	4	0	0	0	74	0	0	60	0	0	46	0	0	0	0	0	0	0	0	0	1	0	0	0	6	0	0	0	0	0	0	0
531	31-Oct-21	7:35:00	1	0	1	0	CT	0	0	46	0	0	0	71	0	0	46	0	0	142	0	0	0	0	0	20	0	0	8	0	17	3	0	5	0	16	0	0	0	0	24
532	31-Oct-21	7:40:00	1	0	1	0	CT	0	0	0	0	0	0	72	0	0	35	0	0	117	0	0	0	0	0	8	31	0	27	0	1	0	0	1	0	104	0	0	2	0	96
533	31-Oct-21	7:45:00	1	0	1	0	CT	0	0	0	0	0	0	45	0	0	0	0	0	102	0	0	0	0	0	0	26	0	13	0	0	0	0	7	0	86	0	0	21	88	60
534	31-Oct-21	7:50:00	1	0	1	0	CT	0	0	10	0	0	0	0	0	0	0	0	0	82	1	0	35	0	0	0	0	38	0	1	0	0	0	35	0	60	0	0	0	122	62
535	31-Oct-21	7:55:00	1	0	1	0	CT	0	0	8	0	0	0	2	0	0	0	0	0	111	0	0	34	0	0	14	0	52	0	1	2	1	0	94	0	42	0	0	0	127	81
536	31-Oct-21	8:00:00	1	0	1	0	CT	0	0	0	0	0	0	13	0	0	0	0	0	97	0	0	2	0	0	51	0	77	0	2	0	2	0	40	0	74	0	0	0	0	0
537	31-Oct-21	8:05:00	1	0	1	0	CT	0	0	0	0	0	0	0	0	32	0	0	0	72	0	0	0	0	0	0	0	78	0	1	0	1	0	0	0	103	0	0	0	0	0
538	31-Oct-21	8:10:00	1	0	1	0	CT	0	0	0	0	0	0	0	0	0	0	0	0	131	0	0	0	1	0	0	0	92	0	0	0	0	0	6	0	78	0	0	0	0	0
539	31-Oct-21	8:15:00	1	0	1	0	CT	0	0	0	54	0	7	0	0	0	0	0	0	100	0	1	0	0	0	0	0	72	0	0	0	0	0	0	46	22	0	0	0	0	0
540	31-Oct-21	8:20:00	1	0	1	0	CT	0	1	39	59	1	104	67	7	116	29	49	72	110	44	66	46	57	47	63	45	50	34	69	46	28	57	52	66	83	96	40	42	140	46
541	31-Oct-21	8:25:00	1	0	1	0	CT	0	1	89	45	30	92	123	45	124	36	76	63	118	36	27	63	123	85	109	34	73	93	66	47	78	86	85	94	97	109	74	84	145	107
542	31-Oct-21	8:30:00	1	0	1	0	CT	0	1	80	24	87	89	109	24	133	20	74	55	110	47	0	50	101	36	125	36	79	83	35	51	99	84	63	82	68	110	89	52	114	96
543	31-Oct-21	8:35:00	1	0	1	0	CT	0	1	70	53	81	83	72	36	116	0	70	59	118	88	0	80	90	76	103	49	48	50	58	60	89	77	59	96	77	73	75	71	112	85
544	31-Oct-21	8:40:00	1	0	1	0	CT	0	1	48	38	74	60	103	2	133	15	32	51	110	37	4	47	66	47	108	51	69	74	48	48	85	106	49	51	11	74	86	72	91	82
545	31-Oct-21	8:45:00	1	0	1	0	CT	0	1	69	42	63	56	76	40	116	73	0	41	107	33	0	64	96	55	103	97	58	84	57	80	96	77	32	75	11	92	72	52	121	120
546	31-Oct-21	8:50:00	1	0	1	0	CT	0	1	65	37	88	62	1	43	98	47	22	52	140	52	2	52	58	51	92	60	85	56	83	42	64	99	30	67	100	70	52	65	144	98
547	31-Oct-21	8:55:00	1	0	1	0	CT	0	1	24	64	67	60	5	20	33	35	69	51	113	57	2	45	75	0	86	43	51	102	47	34	57	114	60	57	86	123	60	46	128	89
548	31-Oct-21	9:00:00	1	0	1	0	CT	0	1	0	42	90	54	0	0	0	27	83	56	131	65	17	79	89	0	102	57	77	94	43	69	77	60	66	102	82	96	82	48	113	110
549	31-Oct-21	9:05:00	1	0	1	0	CT	0	1	0	42	44	58	0	1	0	54	83	38	86	27	9	9	56	0	70	40	44	94	0	82	72	73	57	49	71	102	79	47	118	87
550	31-Oct-21	9:10:00	1	0	1	0	CT	0	1	7	15	0	55	1	0	0	10	51	87	96	0	3	58	78	5	90	25	49	95	0	40	48	52	41	60	79	84	0	55	121	107
551	31-Oct-21	9:15:00	1	0	1	0	CT	0	1	5	0	0	51	65	3	0	35	0	49	112	0	0	15	70	7	70	44	82	65	0	25	54	13	48	69	12	10	0	46	111	98
552	31-Oct-21	9:20:00	1	0	1	0	CT	0	1	104	40	0	0	106	3	0	66	0	19	118	0	1	4	51	0	82	5	47	53	0	0	68	0	59	60	0	4	0	25	63	90
553	31-Oct-21	9:25:00	1	0	1	0	CT	0	1	78	34	0	0	77	0	0	57	0	28	90	5	10	0	57	0	83	0	43	11	0	0	68	0	29	43	0	0	47	46	0	101
554	31-Oct-21	9:30:00	1	0	1	0	CT	0	1	54	46	0	1	42	3	11	72	1	71	23	15	1	0	26	0	3	0	46	0	0	0	38	62	60	23	0	0	83	12	0	74
555	31-Oct-21	9:35:00	1	0	1	0	CT	0	1	55	28	0	5	0	37	82	68	8	50	114	1	1	1	38	0	5	67	34	0	7	11	71	83	69	21	4	0	26	0	1	49
556	31-Oct-21	9:40:00	1	0	1	0	CT	0	1	2	0	0	0	0	0	102	36	0	8	99	1	0	2	56	0	18	72	0	0	47	72	62	56	23	0	120	0	0	0	0	69
557	31-Oct-21	9:45:00	1	0	1	0	CT	0	1	19	0	0	33	0	19	109	0	0	0	7	5	0	0	35	0	68	52	0	0	75	48	68	8	11	0	103	0	6	45	0	76
558	31-Oct-21	9:50:00	1	0	1	0	CT	0	1	3	0	0	90	0	14	102	0	0	33	2	64	1	1	67	0	70	20	0	0	52	50	3	0	36	0	0	0	0	64	23	55
559	31-Oct-21	9:55:00	1	0	1	0	CT	0	1	0	0	0	43	0	4	1	0	0	69	0	0	0	3	26	0	69	0	0	0	49	67	0	0	63	0	0	0	0	45	61	51
560	31-Oct-21	10:00:00	1	0	1	0	CT	0	1	0	0	0	0	0	0	0	0	0	38	0	31	0	7	0	0	4	0	0	0	0	4	0	0	61	1	0	25	14	41	135	66
561	31-Oct-21	10:05:00	1	0	1	0	CT	0	1	0	0	0	0	0	0	0	20	0	2	0	37	5	89	0	0	0	0	0	3	0	0	5	0	34	0	0	97	74	47	120	73
562	31-Oct-21	10:10:00	1	0	1	0	CT	0	1	4	0	0	1	0	0	0	63	5	0	0	9	8	59	0	0	0	0	0	0	0	0	0	0	68	0	0	54	36	0	105	45
563	31-Oct-21	10:15:00	1	0	1	0	CT	0	1	0	0	13	0	0	0	0	74	0	0	4	45	0	92	48	0	0	0	0	35	0	0	2	0	26	1	6	0	5	0	130	20
564	31-Oct-21	10:20:00	1	0	1	0	CT	0	1	0	0	103	0	0	15	0	29	0	0	31	15	0	11	95	6	0	0	23	23	0	32	0	0	0	0	4	0	0	0	107	68
565	31-Oct-21	10:25:00	1	0	1	0	CT	0	1	0	0	78	13	0	71	0	26	0	0	110	1	0	0	51	6	0	0	20	0	0	60	0	21	16	0	73	1	0	0	77	51
566	31-Oct-21	10:30:00	1	0	1	0	CT	0	1	24	0	2	45	0	19	0	0	0	0	54	42	0	0	23	2	39	0	0	0	0	1	1	17	0	0	38	64	0	0	0	29
567	31-Oct-21	10:35:00	1	0	1	0	CT	0	1	84	0	0	67	0	12	0	37	0	0	104	35	0	0	0	63	78	0	0	2	0	0	1	0	0	0	1	59	2	0	0	0
568	31-Oct-21	10:40:00	1	0	1	0	CT	0	1	47	0	4	25	0	1	0	62	0	0	21	56	7	0	0	70	83	0	0	3	0	1	0	0	0	0	0	0	0	54	0	0
569	31-Oct-21	10:45:00	1	0	1	0	CT	0	1	62	0	64	0	0	0	0	16	0	59	0	24	0	0	0	5	50	41	0	0	0	0	2	14	0	7	2	0	13	86	22	0
570	31-Oct-21	10:50:00	1	0	1	0	CT	0	1	22	0	1	0	0	37	0	32	12	91	0	46	0	18	0	3	36	61	0	0	0	0	2	11	0	82	0	0	82	29	65	0
571	31-Oct-21	10:55:00	1	0	1	0	CT	0	1	0	0	0	0	0	18	0	50	23	58	0	51	3	86	0	43	72	57	0	0	0	0	66	16	3	94	72	0	62	40	21	2
572	31-Oct-21	11:00:00	1	0	1	0	CT	0	1	0	0	0	0	0	24	0	35	68	53	1	22	0	64	0	44	0	14	5	22	0	11	67	3	0	11	1	0	32	55	103	72
573	31-Oct-21	11:05:00	1	0	1	0	CT	0	1	0	0	0	0	50	41	0	24	55	48	0	39	0	52	0	38	0	6	1	0	0	35	6	23	55	0	3	31	20	45	141	38
574	31-Oct-21	11:10:00	1	0	1	0	CT	0	1	0	0	16	0	99	29	0	9	7	17	0	62	1	3	17	70	0	7	30	0	0	61	10	0	40	0	5	57	3	11	123	3
575	31-Oct-21	11:15:00	1	0	1	0	CT	0	1	0	0	92	0	72	23	21	58	0	0	0	48	6	11	76	23	0	0	79	0	32	51	60	27	34	0	1	16	5	0	102	0
576	31-Oct-21	11:20:00	1	0	1	0	CT	0	1	0	40	50	0	0	5	53	66	0	0	2	54	28	0	38	0	3	0	76	0	75	0	68	15	14	0	2	1	0	3	90	0
577	31-Oct-21	11:25:00	1	0	1	0	CT	0	1	0	50	0	0	0	7	104	17	0	0	3	58	1	0	83	1	69	0	52	0	69	0	58	18	55	0	0	0	0	58	75	0
578	31-Oct-21	11:30:00	1	0	1	0	CT	0	1	0	77	0	0	0	13	83	75	0	0	0	70	0	0	42	0	83	0	50	0	0	0	7	73	33	0	3	3	0	74	55	0
579	31-Oct-21	11:35:00	1	0	1	0	CT	0	1	0	32	18	4	0	6	127	25	0	0	0	22	0	0	59	0	70	0	61	0	0	0	2	71	71	0	0	20	0	5	5	79
580	31-Oct-21	11:40:00	1	0	1	0	CT	0	1	0	10	99	0	0	15	39	33	0	1	1	10	0	0	4	6	46	0	61	0	4	0	2	55	37	0	0	26	0	0	1	93
581	31-Oct-21	11:45:00	1	0	1	0	CT	0	1	0	0	61	0	2	17	0	0	0	0	0	13	1	0	0	49	0	0	43	0	0	0	3	6	23	0	2	22	0	0	0	33
582	31-Oct-21	11:50:00	1	0	1	0	CT	0	1	58	0	22	26	0	31	0	0	0	6	0	0	4	0	0	53	1	0	53	0	0	0	11	0	79	39	0	19	2	0	3	6
583	31-Oct-21	11:55:00	1	0	1	0	CT	0	1	49	0	0	25	0	0	1	0	0	15	0	13	2	0	1	0	0	0	22	0	0	0	0	0	67	73	0	12	49	41	1	3
584	31-Oct-21	12:00:00	1	0	1	0	CT	0	1	65	0	0	0	0	9	12	0	0	51	0	8	3	41	0	0	0	31	34	0	1	28	7	0	39	15	0	4	69	45	33	0
585	31-Oct-21	12:05:00	1	0	1	0	CT	0	1	57	4	3	18	0	0	0	0	0	93	0	79	0	69	0	0	2	64	16	0	0	81	3	0	42	0	3	0	64	18	70	0
586	31-Oct-21	12:10:00	1	0	1	0	CT	0	1	65	6	0	6	0	18	0	0	0	72	0	52	0	75	0	11	66	45	40	0	0	81	1	14	9	6	33	20	63	49	64	0
587	31-Oct-21	12:15:00	1	0	1	0	CT	0	1	2	0	0	9	0	65	0	0	3	63	64	10	5	68	0	70	79	31	55	0	0	36	7	3	0	16	6	19	79	3	23	0
588	31-Oct-21	12:20:00	1	0	1	0	CT	0	1	0	0	0	0	0	70	0	18	0	73	83	33	11	16	3	83	35	0	0	0	0	14	10	5	0	8	96	57	55	32	40	0
589	31-Oct-21	12:25:00	1	0	1	0	CT	0	1	0	0	0	3	0	38	0	10	0	40	116	32	43	63	61	5	0	0	0	1	0	19	2	14	11	1	76	33	20	10	36	0
590	31-Oct-21	12:30:00	1	0	1	0	CT	0	1	0	0	0	1	1	23	0	0	0	0	76	38	9	69	94	0	0	0	0	0	0	70	5	5	21	9	9	23	0	62	15	0
591	31-Oct-21	12:35:00	1	0	1	0	CT	0	1	0	0	0	2	1	56	9	4	0	0	100	27	7	59	55	2	0	0	0	0	4	2	1	5	70	6	0	17	0	9	44	24
592	31-Oct-21	12:40:00	1	0	1	0	CT	0	1	0	0	0	7	0	16	11	80	0	0	33	0	2	0	56	0	0	0	0	0	64	0	22	42	73	13	3	14	17	32	53	15
593	31-Oct-21	12:45:00	1	0	1	0	CT	0	1	17	31	0	0	17	33	49	68	34	0	4	0	1	0	35	0	0	0	7	0	31	0	4	109	39	1	1	16	1	41	34	5
594	31-Oct-21	12:50:00	1	0	1	0	CT	0	1	73	48	0	0	102	12	114	37	78	0	1	4	0	0	0	0	0	0	0	0	63	0	6	76	11	10	4	0	51	34	37	12
595	31-Oct-21	12:55:00	1	0	1	0	CT	0	1	55	40	12	0	62	0	19	60	57	0	0	34	6	0	0	0	0	0	0	12	7	0	5	4	39	2	4	5	40	5	0	10
596	31-Oct-21	13:00:00	1	0	1	0	CT	0	1	63	32	96	0	34	31	0	0	26	0	0	56	2	0	0	0	0	0	0	27	0	0	0	7	34	16	2	26	31	7	0	18
597	31-Oct-21	13:05:00	1	0	1	0	CT	0	1	71	0	72	0	0	47	0	6	0	0	17	21	6	0	0	0	7	0	0	30	0	0	2	7	59	11	1	46	68	3	6	1
598	31-Oct-21	13:10:00	1	0	1	0	CT	0	1	20	0	57	0	0	24	0	12	0	0	18	20	0	0	0	0	83	0	0	109	0	0	6	3	21	12	0	11	11	0	21	13
599	31-Oct-21	13:15:00	1	0	1	0	CT	0	1	0	0	0	11	0	13	0	0	0	0	14	22	3	46	0	0	76	0	3	84	0	0	5	4	1	1	0	0	0	2	54	2
600	31-Oct-21	13:20:00	1	0	1	0	CT	0	1	1	0	0	18	0	3	0	0	0	0	1	34	29	36	0	0	77	0	1	23	0	0	3	2	3	65	79	14	1	2	57	15
601	31-Oct-21	13:25:00	1	0	1	0	CT	0	1	0	0	0	9	0	3	0	0	0	0	7	40	4	25	1	2	20	0	4	0	20	0	3	6	50	18	113	16	0	51	53	1
602	31-Oct-21	13:30:00	1	0	1	0	CT	0	1	2	0	0	3	0	11	0	0	0	0	4	13	0	6	14	0	0	0	0	0	78	0	7	10	58	5	74	10	35	15	38	1
603	31-Oct-21	13:35:00	1	0	1	0	CT	0	1	7	0	0	0	0	5	4	29	41	2	8	0	0	5	77	4	0	31	0	0	8	0	8	11	37	21	2	2	54	38	17	0
604	31-Oct-21	13:40:00	1	0	1	0	CT	0	1	0	0	0	0	12	6	22	3	0	0	7	18	1	1	43	5	0	71	0	2	0	0	15	1	0	7	0	20	11	31	29	0
605	31-Oct-21	13:45:00	1	0	1	0	CT	0	1	0	0	0	1	0	26	1	13	0	4	0	7	0	0	59	0	0	9	0	2	3	0	10	0	0	4	1	15	0	1	40	0
606	31-Oct-21	13:50:00	1	0	1	0	CT	0	1	2	0	0	25	0	0	0	35	0	5	5	0	0	33	43	0	0	2	0	0	0	0	1	0	0	6	6	0	0	65	27	0
607	31-Oct-21	13:55:00	1	0	1	0	CT	0	1	1	0	0	20	0	1	0	23	0	9	17	1	5	52	0	0	0	6	0	0	0	0	8	4	0	9	4	3	6	8	16	0
608	31-Oct-21	14:00:00	1	0	1	0	CT	0	1	80	0	0	0	0	0	0	14	0	9	36	0	8	40	0	4	0	9	0	0	6	0	9	13	0	3	3	29	0	31	0	0
609	31-Oct-21	14:05:00	1	0	1	0	CT	0	1	71	0	6	0	0	0	0	0	16	8	82	22	0	71	0	0	0	10	0	0	0	0	1	3	0	0	0	29	4	7	5	0
610	31-Oct-21	14:10:00	1	0	1	0	CT	0	1	49	0	37	0	0	0	0	10	28	11	103	51	2	2	3	0	0	73	34	0	0	0	6	18	9	0	14	2	0	0	25	15
611	31-Oct-21	14:15:00	1	0	1	0	CT	0	1	0	0	45	1	33	0	1	7	0	4	77	19	8	0	0	0	0	58	62	0	0	0	16	70	74	6	5	8	0	0	47	28
612	31-Oct-21	14:20:00	1	0	1	0	CT	0	1	0	5	54	18	80	27	43	13	0	0	72	17	1	0	0	0	0	50	40	0	0	0	2	57	66	4	1	18	0	2	31	1
613	31-Oct-21	14:25:00	1	0	1	0	CT	0	1	0	24	47	13	1	4	23	14	0	2	0	43	11	2	0	0	0	15	53	0	0	7	6	57	52	13	0	27	11	5	30	3
614	31-Oct-21	14:30:00	1	0	1	0	CT	0	1	0	43	0	1	12	1	116	68	0	11	0	17	11	0	0	13	37	27	41	59	0	48	2	0	37	8	15	14	10	1	6	16
615	31-Oct-21	14:35:00	1	0	1	0	CT	0	1	3	20	2	0	2	2	111	36	0	9	0	0	1	2	0	28	84	46	42	2	3	74	1	0	24	0	5	4	59	5	46	11
616	31-Oct-21	14:40:00	1	0	1	0	CT	0	1	0	41	0	0	47	44	25	0	0	8	1	10	9	14	0	48	71	0	35	2	46	34	8	3	70	0	7	16	76	34	58	14
617	31-Oct-21	14:45:00	1	0	1	0	CT	0	1	0	39	0	0	5	85	0	0	0	0	2	65	20	63	4	63	62	1	4	0	79	60	4	12	29	0	6	2	35	30	35	20
618	31-Oct-21	14:50:00	1	0	1	0	CT	0	1	62	1	0	1	0	35	0	0	0	0	8	43	1	31	40	100	31	0	0	0	64	50	7	3	1	33	5	19	0	29	25	2
619	31-Oct-21	14:55:00	1	0	1	0	CT	0	1	48	0	0	2	0	37	0	3	0	0	1	52	3	35	43	27	2	22	0	0	0	35	0	0	0	28	0	18	41	52	0	20
620	31-Oct-21	15:00:00	1	0	1	0	CT	0	1	6	0	0	8	0	40	11	0	0	0	2	33	7	50	93	0	3	3	0	1	0	26	3	19	0	7	0	11	48	35	48	18
621	31-Oct-21	15:05:00	1	0	1	0	CT	0	1	3	0	0	5	0	20	24	0	0	0	0	0	7	40	62	1	1	0	0	35	0	18	0	2	2	11	6	27	0	22	30	14
622	31-Oct-21	15:10:00	1	0	1	0	CT	0	1	1	0	0	16	0	24	3	0	0	13	2	17	12	0	56	0	0	10	7	62	0	0	6	0	0	4	5	14	0	11	22	8
623	31-Oct-21	15:15:00	1	0	1	0	CT	0	1	63	0	0	0	0	0	0	29	22	20	32	31	11	1	0	0	5	14	5	67	0	0	7	0	0	0	0	6	5	2	20	16
624	31-Oct-21	15:20:00	1	0	1	0	CT	0	1	55	8	6	0	0	7	0	67	47	11	6	21	3	1	7	0	64	0	1	70	0	0	2	0	20	0	5	24	4	1	44	8
625	31-Oct-21	15:25:00	1	0	1	0	CT	0	1	22	0	0	0	0	1	0	0	58	1	4	0	8	0	0	0	59	0	5	65	0	0	3	0	41	0	10	10	0	6	4	0
626	31-Oct-21	15:30:00	1	0	1	0	CT	0	1	0	0	0	4	0	13	0	63	41	0	1	14	15	0	1	0	65	1	14	3	0	0	5	0	22	0	3	9	0	7	30	0
627	31-Oct-21	15:35:00	1	0	1	0	CT	0	1	0	0	0	7	0	11	0	41	0	0	0	16	7	0	3	0	2	4	6	0	0	0	2	0	66	0	1	0	0	2	0	0
628	31-Oct-21	15:40:00	1	0	1	0	CT	0	1	34	2	0	0	0	3	0	47	0	15	0	15	2	13	0	0	90	2	0	40	0	0	8	0	57	6	0	5	3	1	13	29
629	31-Oct-21	15:45:00	1	0	1	0	CT	0	1	66	15	0	0	1	11	0	13	0	5	3	10	10	52	0	0	43	1	0	24	0	1	1	10	25	3	0	6	0	10	36	25
630	31-Oct-21	15:50:00	1	0	1	0	CT	0	1	14	5	0	1	0	21	10	0	0	4	13	2	9	55	0	0	0	6	0	28	0	2	5	14	30	7	0	0	0	50	39	13
631	31-Oct-21	15:55:00	1	0	1	0	CT	0	1	0	37	0	18	0	6	0	8	0	6	90	0	5	39	0	0	0	6	0	0	40	0	4	63	85	0	4	8	0	22	49	9
632	31-Oct-21	16:00:00	1	0	1	0	CT	0	1	0	59	0	0	25	15	18	14	17	0	79	0	0	49	1	0	0	23	0	0	83	0	1	106	41	1	10	18	6	0	33	3
633	31-Oct-21	16:05:00	1	0	1	0	CT	0	1	2	87	0	0	78	0	42	0	83	46	86	0	0	0	2	0	0	2	0	0	51	0	4	5	50	8	12	0	6	38	8	0
634	31-Oct-21	16:10:00	1	0	1	0	CT	0	1	0	26	0	13	59	7	86	16	68	4	67	0	6	0	9	27	16	2	0	0	7	0	5	0	12	0	14	18	0	66	19	14
635	31-Oct-21	16:15:00	1	0	1	0	CT	0	1	1	15	0	66	45	1	14	0	54	0	0	0	11	8	65	51	6	0	7	0	0	0	8	0	19	12	4	26	0	9	32	18
636	31-Oct-21	16:20:00	1	0	1	0	CT	0	1	0	0	0	48	0	10	0	0	72	0	0	18	1	0	59	51	0	0	43	1	10	0	0	0	1	15	5	1	0	17	39	0
637	31-Oct-21	16:25:00	1	0	1	0	CT	0	1	0	0	0	23	0	1	0	0	0	0	0	58	19	0	17	44	16	0	64	0	0	2	8	0	1	12	1	8	0	1	40	0
638	31-Oct-21	16:30:00	1	0	1	0	CT	0	1	7	0	22	1	0	14	7	0	0	0	0	22	15	0	1	10	5	7	50	0	0	0	4	24	0	50	3	12	14	0	48	0
639	31-Oct-21	16:35:00	1	0	1	0	CT	0	1	55	0	77	0	0	0	3	0	0	0	0	3	8	34	0	1	8	64	66	12	0	27	0	7	0	88	4	5	63	1	6	15
640	31-Oct-21	16:40:00	1	0	1	0	CT	0	1	77	0	78	0	0	0	0	0	0	12	0	25	0	54	0	0	2	50	68	0	5	97	2	79	0	62	6	21	6	2	39	21
641	31-Oct-21	16:45:00	1	0	1	0	CT	0	1	4	0	60	0	9	0	0	67	0	0	2	34	9	2	0	0	0	30	56	0	11	36	93	88	0	75	0	27	0	54	10	2
642	31-Oct-21	16:50:00	1	0	1	0	CT	0	1	0	0	62	0	3	1	0	23	0	5	0	0	0	7	0	39	35	2	13	3	0	33	64	58	6	13	0	8	1	38	0	0
643	31-Oct-21	16:55:00	1	0	1	0	CT	0	1	0	0	0	0	0	0	0	0	0	1	2	2	0	0	0	84	93	2	47	27	0	0	42	13	9	0	0	4	11	31	2	14
644	31-Oct-21	17:00:00	1	0	1	0	CT	0	1	0	0	1	0	0	49	0	0	0	0	5	0	0	0	2	0	76	0	26	81	3	0	87	13	62	0	0	19	0	4	9	2
645	31-Oct-21	17:05:00	1	0	1	0	CT	0	1	0	0	0	0	0	55	0	6	0	3	8	0	1	0	0	0	62	9	0	50	0	0	10	0	50	0	0	5	0	19	45	0
646	31-Oct-21	17:10:00	1	0	1	0	CT	0	1	32	0	0	6	0	42	0	16	20	0	20	71	0	37	0	0	49	0	0	8	0	2	5	0	21	0	0	2	4	22	16	0
647	31-Oct-21	17:15:00	1	0	1	0	CT	0	1	0	0	0	0	0	59	0	63	9	0	101	49	0	51	0	3	0	5	0	12	16	0	3	0	16	0	0	2	0	2	13	23
648	31-Oct-21	17:20:00	1	0	1	0	CT	0	1	0	0	24	0	0	37	0	13	0	0	61	92	0	44	0	38	0	0	0	2	75	0	2	0	75	0	0	14	0	0	30	60
649	31-Oct-21	17:25:00	1	0	1	0	CT	0	1	0	0	66	7	1	28	0	9	0	0	77	16	0	35	0	85	0	0	37	1	59	0	0	0	44	0	0	6	12	0	7	74
650	31-Oct-21	17:30:00	1	0	1	0	CT	0	1	0	0	62	82	0	36	23	13	0	14	95	0	8	61	0	0	0	1	79	5	56	0	0	0	25	0	0	0	59	0	21	103
651	31-Oct-21	17:35:00	1	0	1	0	CT	0	1	2	22	11	58	0	0	130	9	0	12	58	0	17	68	0	0	0	0	48	3	31	0	0	0	45	0	0	0	58	0	25	81
652	31-Oct-21	17:40:00	1	0	1	0	CT	0	1	0	27	0	51	0	9	83	0	0	1	63	9	6	51	0	0	0	0	71	2	8	0	63	5	73	0	0	0	42	4	0	56
653	31-Oct-21	17:45:00	1	0	1	0	CT	0	1	0	11	1	24	0	26	74	0	0	19	4	10	0	57	67	0	0	5	44	0	0	0	0	13	41	0	0	7	5	3	0	54
654	31-Oct-21	17:50:00	1	0	1	0	CT	0	1	6	0	6	0	0	2	82	0	70	8	0	10	9	9	67	28	0	37	40	0	0	20	73	7	8	0	9	52	0	36	4	33
655	31-Oct-21	17:55:00	1	0	1	0	CT	0	1	2	0	0	0	5	3	72	0	70	0	1	22	15	1	23	35	0	43	1	0	0	66	63	0	63	3	129	82	1	45	17	0
656	31-Oct-21	18:00:00	1	0	1	0	CT	0	1	1	0	0	0	1	0	0	0	7	2	0	55	10	1	0	4	0	56	63	0	0	78	9	0	0	0	110	99	3	23	65	0
657	31-Oct-21	18:05:00	1	0	1	0	CT	0	1	2	0	0	1	0	0	15	0	1	6	0	2	1	0	0	0	0	14	0	0	0	0	2	0	18	21	54	78	0	0	37	10
658	31-Oct-21	18:10:00	1	0	1	0	CT	0	1	3	0	0	1	3	10	29	14	12	7	0	6	13	2	0	8	9	0	1	0	0	0	3	0	69	39	39	50	9	23	35	54
659	31-Oct-21	18:15:00	1	0	1	0	CT	0	1	64	23	2	68	3	31	41	19	71	67	37	36	30	34	22	42	82	0	84	34	6	22	7	24	87	40	97	76	31	43	53	71
660	31-Oct-21	18:20:00	1	0	1	0	CT	0	1	61	39	3	63	66	36	87	63	53	59	83	47	34	35	93	34	86	9	61	49	19	50	27	76	57	38	11	44	83	24	34	59
661	31-Oct-21	18:25:00	1	0	1	0	CT	0	1	70	50	71	62	83	16	89	2	35	56	41	28	13	54	92	8	58	1	70	77	2	41	98	83	82	17	11	37	71	8	2	9
662	31-Oct-21	18:30:00	1	0	1	0	CT	0	1	18	0	81	4	83	40	94	56	0	0	10	40	0	0	48	0	34	24	21	78	4	31	67	56	79	12	3	44	66	43	0	3
663	31-Oct-21	18:35:00	1	0	1	0	CT	0	1	5	0	32	0	3	18	29	53	0	4	125	57	3	10	57	0	0	43	65	28	0	64	59	0	69	0	2	25	24	30	15	4
664	31-Oct-21	18:40:00	1	0	1	0	CT	0	1	0	0	0	1	0	2	1	32	0	0	87	27	9	0	14	0	0	2	50	21	0	21	102	0	110	7	0	21	0	26	5	0
665	31-Oct-21	18:45:00	1	0	1	0	CT	0	1	0	0	0	0	0	0	0	0	0	0	4	1	0	0	0	0	0	0	36	0	0	0	0	0	0	3	43	0	1	0	0	0
666	31-Oct-21	18:50:00	1	0	1	0	CT	0	1	0	0	0	0	0	3	7	26	2	17	0	3	0	0	0	0	0	0	0	0	0	0	0	0	3	0	5	0	1	0	0	5
667	31-Oct-21	18:55:00	1	0	1	0	CT	0	1	0	10	0	0	0	0	35	13	0	97	0	63	0	0	0	0	0	15	38	19	0	0	0	0	0	0	2	6	0	0	0	74
668	31-Oct-21	19:00:00	1	0	1	0	CT	0	1	0	53	34	0	0	0	110	8	1	37	64	45	0	0	0	0	39	18	52	38	0	0	57	1	34	0	0	28	0	7	0	79
669	31-Oct-21	19:05:00	1	0	1	0	CT	0	1	0	63	77	0	0	0	63	0	40	39	93	50	0	0	1	0	74	16	48	48	0	0	80	0	68	0	1	86	0	0	0	63
670	31-Oct-21	19:10:00	1	0	1	0	CT	0	1	0	0	15	0	3	0	0	18	79	0	14	37	0	0	86	0	0	3	57	28	2	0	24	0	33	0	0	74	0	0	0	0
671	31-Oct-21	19:15:00	1	0	1	0	CT	0	1	0	30	25	9	23	0	0	69	1	15	100	2	0	65	33	63	4	7	91	12	98	0	0	26	42	0	3	0	0	6	0	0
672	31-Oct-21	19:20:00	1	0	1	0	CT	0	1	50	27	67	84	0	3	0	12	37	87	33	0	0	3	9	36	96	40	19	64	63	0	63	74	63	68	33	2	0	0	0	0
673	31-Oct-21	19:25:00	1	0	1	0	CT	0	1	109	44	60	74	0	66	0	64	57	41	0	0	11	44	80	58	37	21	63	42	33	0	89	55	52	59	8	70	0	0	0	64
674	31-Oct-21	19:30:00	1	0	1	0	CT	0	1	85	22	70	49	0	27	36	41	60	8	83	0	75	35	0	0	0	15	70	0	82	0	20	31	36	30	0	43	0	0	108	34
675	31-Oct-21	19:35:00	1	0	1	0	CT	0	1	7	0	34	66	0	27	94	18	54	41	74	0	89	14	57	3	74	60	39	36	61	0	12	21	73	0	51	28	0	52	120	23
676	31-Oct-21	19:40:00	1	0	1	0	CT	0	1	76	48	70	54	33	58	18	63	45	33	62	57	88	28	19	37	54	31	57	67	69	0	81	0	91	4	103	74	13	27	106	61
677	31-Oct-21	19:45:00	1	0	1	0	CT	0	1	43	22	42	57	102	47	70	58	1	52	76	68	86	5	10	61	88	16	57	78	66	0	73	17	24	92	9	58	29	55	105	24
678	31-Oct-21	19:50:00	1	0	1	0	CT	0	1	34	38	3	86	49	72	90	7	68	49	26	18	103	50	74	81	66	17	44	89	53	30	2	33	0	31	19	28	41	62	73	0
679	31-Oct-21	19:55:00	1	0	1	0	CT	0	1	59	30	81	60	64	26	92	40	45	17	108	1	80	16	74	68	40	50	32	79	63	75	64	6	11	0	86	63	53	34	31	64
680	31-Oct-21	20:00:00	1	0	1	0	CT	0	1	54	79	21	86	6	0	70	55	67	61	94	0	82	37	77	0	20	63	66	2	57	42	82	7	78	53	40	65	47	5	0	69
681	31-Oct-21	20:05:00	1	0	1	0	CT	0	1	52	60	74	74	2	20	82	70	11	42	28	13	63	31	61	21	25	49	39	78	45	58	75	52	30	15	50	24	68	54	77	15
682	31-Oct-21	20:10:00	1	0	1	0	CT	0	1	39	47	61	57	0	24	84	38	80	40	81	71	69	38	69	39	65	40	84	54	33	0	76	12	37	62	40	58	19	79	84	93
683	31-Oct-21	20:15:00	1	0	1	0	CT	0	1	52	31	24	65	74	16	140	27	42	42	115	41	94	35	31	85	49	51	61	52	78	10	74	49	5	38	70	73	69	19	57	48
684	31-Oct-21	20:20:00	1	0	1	0	CT	0	1	80	79	57	83	117	85	168	48	92	94	136	66	103	68	148	51	121	118	58	93	89	79	129	95	75	49	90	102	79	73	150	137
685	31-Oct-21	20:25:00	1	0	1	0	CT	0	0	101	79	82	125	116	105	202	18	93	90	164	77	134	79	137	97	136	109	105	105	92	53	108	113	92	92	98	137	92	93	175	150
686	31-Oct-21	20:30:00	1	0	1	0	CT	0	0	77	52	73	100	97	94	176	69	74	95	144	94	124	39	128	82	140	100	101	98	76	44	80	117	111	67	104	112	83	97	163	118
687	31-Oct-21	20:35:00	1	0	1	0	CT	0	0	104	64	79	96	116	85	197	37	77	91	141	47	128	67	102	45	140	108	102	98	77	46	67	125	81	74	104	125	110	90	137	110
688	31-Oct-21	20:40:00	1	0	1	0	CT	0	0	90	49	71	90	119	95	192	63	100	83	139	0	115	94	102	103	127	111	83	85	86	54	82	113	103	82	104	113	103	89	154	87
689	31-Oct-21	20:45:00	1	0	1	0	CT	0	0	88	59	76	96	102	91	188	63	59	68	134	0	112	74	100	55	123	92	68	81	84	55	57	110	65	91	95	120	85	83	135	102
690	31-Oct-21	20:50:00	1	0	1	0	CT	0	0	100	0	89	95	79	93	173	63	91	71	102	0	124	69	64	95	124	85	86	86	79	68	85	113	65	63	104	124	100	85	148	95
691	31-Oct-21	20:55:00	1	0	1	0	CT	0	0	116	0	69	66	100	16	145	13	82	73	137	0	89	63	71	36	129	99	33	67	78	55	111	90	57	86	99	107	90	79	142	130
692	31-Oct-21	21:00:00	1	0	1	0	CT	0	0	101	0	76	98	118	0	206	0	67	83	126	0	129	73	74	0	116	76	0	104	92	50	92	111	38	83	119	59	127	76	147	106
693	31-Oct-21	21:05:00	1	0	1	0	CT	0	0	98	0	49	106	80	0	201	0	42	63	65	0	118	41	94	0	122	80	12	55	84	53	84	83	27	80	90	0	90	69	77	116
694	31-Oct-21	21:10:00	1	0	1	0	CT	0	0	92	0	2	65	74	0	202	0	36	76	0	0	112	83	86	0	104	105	1	67	106	52	57	113	4	45	107	0	86	84	51	89
695	31-Oct-21	21:15:00	1	0	1	0	CT	0	0	98	0	0	8	112	0	199	0	67	46	0	0	124	68	75	0	148	63	0	55	96	46	0	129	27	0	104	0	91	91	0	115
696	31-Oct-21	21:20:00	1	0	1	0	CT	0	0	106	0	0	0	83	0	174	0	47	4	0	0	86	40	51	0	129	30	0	34	53	45	0	55	0	0	86	0	103	93	0	86
697	31-Oct-21	21:25:00	1	0	1	0	CT	0	0	6	0	0	0	19	0	168	0	0	0	0	0	123	63	68	0	108	0	0	0	67	25	0	12	0	0	86	0	22	100	0	93
698	31-Oct-21	21:30:00	1	0	1	0	CT	0	0	0	0	0	0	0	0	215	0	0	0	0	0	121	0	48	0	102	0	0	0	36	5	0	0	0	0	61	0	0	109	0	104
699	31-Oct-21	21:35:00	1	0	1	0	CT	0	0	0	0	0	0	0	0	192	0	0	0	0	0	27	0	84	0	38	0	0	0	0	0	0	1	0	0	5	0	0	42	0	124
700	31-Oct-21	21:40:00	1	0	1	0	CT	0	0	0	0	0	0	0	3	157	0	0	0	0	0	120	0	70	0	63	0	0	0	0	0	0	4	0	0	0	0	0	0	0	24
701	31-Oct-21	21:45:00	1	0	1	0	CT	0	0	0	0	0	0	0	10	88	0	0	0	0	0	131	1	0	0	0	0	0	0	0	0	0	0	0	0	0	0	0	0	0	124
702	31-Oct-21	21:50:00	1	0	1	0	CT	0	0	0	0	0	6	0	0	42	0	0	0	0	0	82	0	0	0	3	0	0	0	0	0	0	0	0	0	0	0	0	0	0	74
703	31-Oct-21	21:55:00	1	0	1	0	CT	0	0	0	0	0	0	0	0	116	0	0	0	0	0	7	0	0	0	0	0	0	0	0	0	0	0	0	0	0	0	0	0	0	73
704	31-Oct-21	22:00:00	1	0	1	0	CT	0	0	0	0	0	0	0	0	0	0	0	0	0	0	0	0	0	0	0	0	0	0	0	0	0	0	0	0	0	0	0	0	0	47
705	31-Oct-21	22:05:00	1	0	1	0	CT	0	0	0	0	0	0	0	0	0	0	0	0	0	0	0	0	0	0	0	0	0	0	0	0	0	0	0	0	0	0	0	0	0	63
706	31-Oct-21	22:10:00	1	0	1	0	CT	0	0	0	0	0	0	0	0	0	0	0	0	0	0	0	0	0	0	0	0	0	0	0	0	0	0	0	0	0	4	0	0	0	0
707	31-Oct-21	22:15:00	1	0	1	0	CT	0	0	0	0	0	0	0	0	0	39	0	0	0	0	0	0	0	0	0	0	0	0	0	0	0	0	0	0	0	13	0	0	0	1
708	31-Oct-21	22:20:00	1	0	1	0	CT	0	0	0	0	0	3	0	0	0	41	0	0	0	0	0	0	0	0	0	0	0	0	0	0	0	0	0	0	0	0	0	0	0	0
709	31-Oct-21	22:25:00	1	0	1	0	CT	0	0	0	0	0	0	0	0	0	6	0	0	0	0	0	0	0	0	0	0	0	0	0	0	0	15	0	0	0	0	0	0	0	0
710	31-Oct-21	22:30:00	1	0	1	0	CT	0	0	0	0	0	0	0	0	0	0	0	0	0	0	0	0	0	0	1	0	1	0	0	0	0	1	0	0	0	0	0	0	0	0
711	31-Oct-21	22:35:00	1	0	1	0	CT	0	0	0	0	0	0	0	0	0	0	0	0	0	0	0	0	0	0	0	0	0	0	0	0	0	0	0	0	0	0	0	0	0	0
712	31-Oct-21	22:40:00	1	0	1	0	CT	0	0	0	0	0	0	0	0	0	15	0	0	0	0	0	0	0	0	0	0	0	0	0	0	0	1	0	0	0	0	0	0	0	0
713	31-Oct-21	22:45:00	1	0	1	0	CT	0	0	0	0	0	0	0	0	0	0	0	0	0	0	0	0	0	0	0	0	0	0	0	0	0	0	0	0	0	0	0	0	0	0
714	31-Oct-21	22:50:00	1	0	1	0	CT	0	0	0	0	0	0	0	3	0	0	0	0	0	0	0	0	0	0	0	0	0	0	0	0	0	0	0	0	0	0	0	0	0	0
715	31-Oct-21	22:55:00	1	0	1	0	CT	0	0	0	0	0	0	0	0	0	12	0	0	0	0	0	0	0	0	0	0	0	0	0	0	0	0	0	0	0	0	0	0	0	0
716	31-Oct-21	23:00:00	1	0	1	0	CT	0	0	0	0	0	0	0	0	0	0	0	0	0	0	0	0	0	0	29	0	0	0	0	0	0	0	0	0	0	0	0	0	0	0
717	31-Oct-21	23:05:00	1	0	1	0	CT	0	0	0	0	0	0	0	0	0	0	0	0	0	0	0	0	0	0	0	0	0	0	0	0	0	0	0	0	0	0	0	0	0	0
718	31-Oct-21	23:10:00	1	0	1	0	CT	0	0	0	0	0	0	0	0	0	16	0	0	0	0	0	0	0	0	0	0	0	0	0	0	0	0	0	0	0	0	0	0	0	0
719	31-Oct-21	23:15:00	1	0	1	0	CT	0	0	0	0	0	0	0	0	0	5	0	0	0	0	0	0	0	0	0	0	0	0	0	0	0	0	0	0	0	0	0	0	0	0
720	31-Oct-21	23:20:00	1	0	1	0	CT	0	0	0	0	0	0	0	0	0	0	0	0	0	0	0	0	0	0	0	0	0	0	0	0	0	0	0	0	0	0	0	0	0	0
721	31-Oct-21	23:25:00	1	0	1	0	CT	0	0	0	0	0	0	0	4	0	48	0	0	0	0	0	0	0	0	0	0	0	0	0	0	0	0	0	0	0	0	0	0	0	0
722	31-Oct-21	23:30:00	1	0	1	0	CT	0	0	1	0	0	0	0	0	0	3	0	0	0	0	0	0	0	0	0	0	0	0	0	0	0	0	2	0	0	0	0	0	0	0
723	31-Oct-21	23:35:00	1	0	1	0	CT	0	0	0	0	0	0	0	0	0	0	0	0	0	0	0	0	0	0	0	0	1	0	0	0	0	0	0	0	0	0	0	0	0	0
724	31-Oct-21	23:40:00	1	0	1	0	CT	0	0	0	0	0	0	0	0	0	0	0	0	0	0	0	0	0	0	0	0	0	0	0	0	0	0	0	0	0	0	0	0	0	0
725	31-Oct-21	23:45:00	1	0	1	0	CT	0	0	0	0	0	0	0	0	0	0	0	0	0	0	0	0	0	0	0	0	22	0	1	0	0	0	50	0	0	8	0	0	0	0
726	31-Oct-21	23:50:00	1	0	1	0	CT	0	0	0	0	0	0	0	0	0	1	0	0	0	0	0	0	0	0	0	0	0	0	0	0	0	0	82	0	0	0	0	0	0	0
727	31-Oct-21	23:55:00	1	0	1	0	CT	0	0	0	0	0	0	0	0	0	0	0	0	0	0	0	63	0	0	0	0	0	0	0	0	0	0	60	0	0	0	0	0	0	0
728	1-Nov-21	0:00:00	1	0	1	0	CT	0	0	0	0	0	0	0	0	0	21	0	0	0	0	0	0	0	0	0	0	0	0	0	0	0	0	55	0	0	0	0	0	0	0
729	1-Nov-21	0:05:00	1	0	1	0	CT	0	0	0	0	1	0	1	0	0	1	0	0	0	0	0	0	0	0	0	0	0	0	0	0	0	0	11	0	0	0	0	0	0	0
730	1-Nov-21	0:10:00	1	0	1	0	CT	0	0	0	0	0	0	0	3	0	5	0	0	0	0	0	0	0	0	0	0	0	0	0	0	0	0	9	0	0	5	0	0	0	0
731	1-Nov-21	0:15:00	1	0	1	0	CT	0	0	0	0	0	0	0	0	0	0	0	0	0	0	0	0	0	0	0	0	0	0	0	0	0	0	6	0	0	0	0	0	0	0
732	1-Nov-21	0:20:00	1	0	1	0	CT	0	0	0	0	0	0	0	0	0	0	0	0	0	0	0	0	0	0	0	0	0	0	0	0	0	0	7	0	0	0	0	0	0	0
733	1-Nov-21	0:25:00	1	0	1	0	CT	0	0	0	0	0	0	0	0	0	1	0	0	39	0	0	0	0	2	0	0	0	0	0	0	0	0	0	0	104	0	0	0	0	3
734	1-Nov-21	0:30:00	1	0	1	0	CT	0	0	0	0	0	0	0	0	0	0	0	0	99	0	0	0	0	0	0	0	0	0	0	0	0	0	0	0	107	0	0	0	0	18
735	1-Nov-21	0:35:00	1	0	1	0	CT	0	0	0	0	0	0	0	0	0	0	0	0	108	0	0	1	0	0	15	0	28	0	0	0	0	0	0	0	103	0	0	0	0	12
736	1-Nov-21	0:40:00	1	0	1	0	CT	0	0	0	0	0	0	0	0	0	1	0	0	48	0	0	0	0	0	63	0	0	0	0	0	0	0	0	0	93	0	0	0	0	0
737	1-Nov-21	0:45:00	1	0	1	0	CT	0	0	0	0	0	0	0	0	0	1	0	0	0	0	0	0	0	0	1	0	0	0	0	0	0	0	0	0	45	0	0	0	0	0
738	1-Nov-21	0:50:00	1	0	1	0	CT	0	0	0	0	0	0	0	0	0	38	0	0	0	0	0	0	0	0	0	0	0	0	0	0	0	0	0	0	0	0	0	0	0	0
739	1-Nov-21	0:55:00	1	0	1	0	CT	0	0	0	0	0	0	0	0	0	12	0	0	0	0	0	0	0	0	0	0	0	0	0	0	0	0	0	0	0	0	0	0	0	0
740	1-Nov-21	1:00:00	1	0	1	0	CT	0	0	0	0	0	0	0	0	0	5	0	0	0	0	0	0	0	0	0	0	0	0	0	1	0	0	0	0	0	0	0	0	0	0
741	1-Nov-21	1:05:00	1	0	1	0	CT	0	0	0	0	0	0	0	0	0	1	0	0	0	0	17	0	0	0	0	0	0	0	0	0	0	0	0	0	0	0	0	0	0	0
742	1-Nov-21	1:10:00	1	0	1	0	CT	0	0	0	0	0	0	0	0	0	63	0	0	0	0	0	0	0	0	0	0	0	0	0	0	0	0	0	0	0	0	0	0	0	0
743	1-Nov-21	1:15:00	1	0	1	0	CT	0	0	0	0	0	0	0	0	0	63	0	0	0	0	0	0	0	0	0	0	0	0	0	0	0	0	1	0	0	0	0	0	0	0
744	1-Nov-21	1:20:00	1	0	1	0	CT	0	0	0	0	0	0	0	1	0	65	0	0	0	0	0	0	0	0	0	0	0	0	0	0	0	0	56	0	0	0	2	0	0	0
745	1-Nov-21	1:25:00	1	0	1	0	CT	0	0	0	0	0	0	0	0	0	43	0	0	0	0	0	0	0	0	0	0	0	0	0	0	0	0	0	0	0	0	6	0	0	0
746	1-Nov-21	1:30:00	1	0	1	0	CT	0	0	2	0	0	0	0	0	0	5	0	0	0	0	0	0	0	0	34	0	0	0	0	0	0	0	25	0	0	0	1	0	0	0
747	1-Nov-21	1:35:00	1	0	1	0	CT	0	0	41	0	0	0	0	3	0	2	0	0	0	0	0	0	0	0	0	0	0	0	0	0	0	0	13	0	0	0	0	0	0	0
748	1-Nov-21	1:40:00	1	0	1	0	CT	0	0	0	0	0	0	0	0	0	13	0	0	0	0	0	0	0	0	0	0	0	0	0	0	0	0	0	0	0	0	0	0	1	15
749	1-Nov-21	1:45:00	1	0	1	0	CT	0	0	0	0	0	0	0	0	0	2	0	0	0	0	0	0	0	0	0	0	0	0	0	0	0	0	0	0	0	0	0	0	89	3
750	1-Nov-21	1:50:00	1	0	1	0	CT	0	0	0	0	0	0	0	0	0	0	0	0	0	0	0	0	0	0	0	0	0	0	27	0	0	0	0	0	0	63	0	0	113	0
751	1-Nov-21	1:55:00	1	0	1	0	CT	0	0	0	0	0	6	0	0	0	0	0	0	0	0	0	0	0	0	0	0	0	0	0	0	0	0	0	0	0	0	0	0	1	0
752	1-Nov-21	2:00:00	1	0	1	0	CT	0	0	0	0	0	13	0	0	0	23	0	0	0	0	0	0	0	0	0	0	0	0	0	0	0	0	0	0	0	0	0	0	0	0
753	1-Nov-21	2:05:00	1	0	1	0	CT	0	0	0	0	0	27	0	0	0	0	0	0	0	0	0	0	0	1	0	0	0	0	0	0	0	0	0	0	0	0	0	0	0	0
754	1-Nov-21	2:10:00	1	0	1	0	CT	0	0	2	0	0	0	0	0	0	0	0	0	0	0	0	0	0	0	0	0	0	0	0	0	0	0	0	0	0	0	0	0	0	0
755	1-Nov-21	2:15:00	1	0	1	0	CT	0	0	0	0	0	0	0	14	0	13	0	0	0	0	0	0	0	0	0	0	0	0	0	0	0	0	0	0	0	0	0	0	0	0
756	1-Nov-21	2:20:00	1	0	1	0	CT	0	0	0	0	0	0	0	5	0	0	0	0	0	0	0	0	0	0	0	0	0	0	0	0	0	0	0	0	0	0	0	0	0	0
757	1-Nov-21	2:25:00	1	0	1	0	CT	0	0	0	0	0	0	0	0	0	0	0	0	0	0	0	0	0	0	0	0	0	0	0	0	0	0	0	0	0	0	0	4	4	0
758	1-Nov-21	2:30:00	1	0	1	0	CT	0	0	1	0	0	0	0	0	0	0	0	0	0	0	0	0	0	0	0	0	0	0	0	0	23	0	0	0	0	0	0	71	0	0
759	1-Nov-21	2:35:00	1	0	1	0	CT	0	0	0	0	0	0	0	0	0	0	0	0	0	0	0	0	0	0	0	0	0	0	0	0	53	0	0	0	0	0	14	73	0	0
760	1-Nov-21	2:40:00	1	0	1	0	CT	0	0	0	0	0	20	0	0	0	0	0	0	0	0	0	0	0	0	0	0	0	0	0	0	8	0	0	0	0	0	20	85	0	0
761	1-Nov-21	2:45:00	1	0	1	0	CT	0	0	0	0	0	47	0	0	0	0	0	0	0	0	0	0	0	0	0	0	0	0	1	0	0	0	2	0	0	0	0	62	0	0
762	1-Nov-21	2:50:00	1	0	1	0	CT	0	0	0	0	0	0	0	0	0	0	0	0	0	0	0	0	0	0	0	0	0	0	24	0	17	0	29	68	0	0	0	38	0	0
763	1-Nov-21	2:55:00	1	0	1	0	CT	0	0	0	0	0	0	0	0	0	0	0	6	0	0	0	0	0	0	0	0	0	0	3	0	80	0	32	79	0	0	0	0	19	0
764	1-Nov-21	3:00:00	1	0	1	0	CT	0	0	0	0	0	0	0	0	0	0	0	48	0	0	0	0	0	0	0	0	0	0	0	0	19	0	0	66	0	0	0	0	99	0
765	1-Nov-21	3:05:00	1	0	1	0	CT	0	0	0	0	0	0	0	0	0	0	0	0	0	0	0	0	0	0	0	0	0	0	0	0	0	0	0	1	0	0	0	0	59	0
766	1-Nov-21	3:10:00	1	0	1	0	CT	0	0	0	0	0	1	0	0	0	0	0	0	0	0	0	0	0	0	0	0	0	0	0	0	0	2	0	0	0	0	0	6	0	0
767	1-Nov-21	3:15:00	1	0	1	0	CT	0	0	0	0	0	0	0	0	0	42	0	3	0	0	0	0	0	0	0	0	0	0	0	0	0	1	0	0	0	0	0	0	0	0
768	1-Nov-21	3:20:00	1	0	1	0	CT	0	0	43	0	0	0	0	0	0	63	0	0	0	0	0	0	0	0	13	0	0	0	0	0	0	0	0	0	0	0	0	0	0	0
769	1-Nov-21	3:25:00	1	0	1	0	CT	0	0	0	0	0	0	0	0	19	51	0	0	0	0	0	87	0	0	0	0	0	0	0	0	0	0	1	0	0	0	0	0	0	8
770	1-Nov-21	3:30:00	1	0	1	0	CT	0	0	0	0	0	0	0	0	86	55	0	0	0	0	0	69	0	0	0	0	0	0	0	0	0	0	0	0	0	0	0	0	0	0
771	1-Nov-21	3:35:00	1	0	1	0	CT	0	0	0	0	0	0	0	0	11	15	0	0	0	0	0	51	0	0	0	0	0	0	0	0	0	0	0	0	0	0	0	0	46	0
772	1-Nov-21	3:40:00	1	0	1	0	CT	0	0	0	0	0	0	0	0	0	0	0	0	0	0	0	62	0	0	0	0	0	0	0	0	0	0	0	0	0	0	0	0	0	0
773	1-Nov-21	3:45:00	1	0	1	0	CT	0	0	0	0	0	0	0	0	0	0	0	0	0	0	0	25	0	0	0	0	0	0	0	0	0	0	0	0	0	0	0	0	0	0
774	1-Nov-21	3:50:00	1	0	1	0	CT	0	0	0	0	0	0	0	3	0	0	0	0	57	0	0	53	0	0	0	0	0	0	0	0	0	2	54	0	0	0	0	0	0	0
775	1-Nov-21	3:55:00	1	0	1	0	CT	0	0	1	0	0	0	0	0	0	0	0	15	125	0	0	9	0	0	2	0	0	0	0	0	0	0	62	0	0	0	0	0	0	5
776	1-Nov-21	4:00:00	1	0	1	0	CT	0	0	0	0	0	0	0	0	0	0	0	8	119	0	0	0	0	0	0	0	5	0	0	0	0	0	27	0	0	0	0	0	0	0
777	1-Nov-21	4:05:00	1	0	1	0	CT	0	0	0	0	0	32	0	0	0	0	0	0	87	0	0	0	0	0	0	0	0	0	0	21	0	0	1	0	0	0	0	0	0	0
778	1-Nov-21	4:10:00	1	0	1	0	CT	0	0	0	0	0	0	0	0	0	0	0	0	88	0	0	19	0	0	0	0	0	0	0	0	0	1	16	0	0	0	0	0	0	0
779	1-Nov-21	4:15:00	1	0	1	0	CT	0	0	0	0	0	0	0	0	0	0	0	0	102	0	0	0	0	5	0	0	0	0	0	0	0	0	0	0	0	0	0	0	0	0
780	1-Nov-21	4:20:00	1	0	1	0	CT	0	0	0	0	0	0	0	0	0	0	0	0	102	0	0	0	0	10	0	0	1	0	0	0	0	0	0	0	0	0	0	0	0	0
781	1-Nov-21	4:25:00	1	0	1	0	CT	0	0	0	0	0	0	0	0	0	0	0	0	57	0	0	0	0	19	0	0	0	0	0	0	0	0	19	0	0	0	9	0	0	5
782	1-Nov-21	4:30:00	1	0	1	0	CT	0	0	0	0	0	0	0	0	0	0	0	0	12	0	0	0	0	10	0	0	0	0	3	0	0	0	63	0	0	0	0	0	0	0
783	1-Nov-21	4:35:00	1	0	1	0	CT	0	0	0	0	0	0	0	0	0	0	0	2	0	0	0	0	0	0	3	0	0	0	15	0	0	0	69	0	0	0	0	0	0	0
784	1-Nov-21	4:40:00	1	0	1	0	CT	0	0	0	0	0	0	0	0	0	0	0	0	0	0	0	0	0	0	0	0	9	0	27	0	0	0	72	0	0	0	0	0	0	0
785	1-Nov-21	4:45:00	1	0	1	0	CT	0	0	0	0	0	0	0	0	0	0	0	0	0	0	0	0	0	0	0	0	0	0	0	0	0	0	13	0	0	0	0	0	0	0
786	1-Nov-21	4:50:00	1	0	1	0	CT	0	0	0	0	0	0	0	0	0	0	0	0	0	0	0	0	0	0	0	0	0	0	0	0	0	0	63	0	0	0	1	0	4	0
787	1-Nov-21	4:55:00	1	0	1	0	CT	0	0	0	0	0	0	0	0	0	0	0	0	0	0	0	0	0	0	0	0	0	0	0	0	0	0	42	0	0	0	7	0	0	0
788	1-Nov-21	5:00:00	1	0	1	0	CT	0	0	0	0	0	0	0	0	0	0	0	0	1	0	0	0	0	0	0	0	0	0	0	1	0	0	0	0	0	18	0	0	0	0
789	1-Nov-21	5:05:00	1	0	1	0	CT	0	0	0	0	0	0	0	0	0	0	0	0	0	0	0	0	0	0	0	0	0	0	0	0	0	0	1	0	0	0	0	0	1	0
790	1-Nov-21	5:10:00	1	0	1	0	CT	0	0	0	0	0	0	0	0	0	0	0	0	0	0	0	0	0	0	2	0	0	3	0	0	0	0	0	0	0	0	0	0	0	0
791	1-Nov-21	5:15:00	1	0	1	0	CT	0	0	0	0	0	0	0	0	0	63	0	0	0	63	0	0	0	0	0	0	0	0	0	0	0	0	0	0	0	0	0	0	0	0
792	1-Nov-21	5:20:00	1	0	1	0	CT	0	0	0	0	0	0	0	0	0	63	0	0	0	28	0	0	0	0	0	0	0	0	0	0	0	0	0	0	0	0	0	0	0	3
793	1-Nov-21	5:25:00	1	0	1	0	CT	0	0	0	0	0	0	0	0	0	19	0	0	1	1	0	0	0	0	0	0	0	0	0	0	0	0	0	0	91	0	0	0	1	17
794	1-Nov-21	5:30:00	1	0	1	0	CT	0	0	0	0	0	0	0	0	0	34	0	0	0	0	0	0	0	0	0	0	0	0	0	0	0	0	0	0	96	0	0	0	0	0
795	1-Nov-21	5:35:00	1	0	1	0	CT	0	0	0	0	0	0	0	0	0	63	0	0	0	0	0	0	0	0	0	0	0	0	0	0	0	0	1	0	91	0	0	0	0	0
796	1-Nov-21	5:40:00	1	0	1	0	CT	0	0	0	0	0	0	0	0	0	63	0	0	0	1	0	0	0	0	0	0	0	0	0	0	0	0	63	0	65	0	0	0	0	1
797	1-Nov-21	5:45:00	1	0	1	0	CT	0	0	0	0	0	0	0	0	0	20	0	0	0	1	0	0	0	0	0	0	0	0	0	1	0	0	13	0	24	0	0	1	0	64
798	1-Nov-21	5:50:00	1	0	1	0	CT	0	0	0	0	0	0	0	0	0	34	0	0	0	0	0	0	0	0	0	0	0	0	0	7	0	0	0	0	0	0	0	0	0	0
799	1-Nov-21	5:55:00	1	0	1	0	CT	0	0	0	0	0	0	0	0	0	0	0	0	0	0	0	0	0	0	0	0	0	0	0	20	0	0	0	0	0	0	0	0	0	0
800	1-Nov-21	6:00:00	1	0	1	0	CT	0	0	0	0	0	0	0	0	0	0	0	0	0	2	0	0	0	0	0	0	0	0	0	0	0	0	0	0	0	0	0	0	0	0
801	1-Nov-21	6:05:00	1	0	1	0	CT	0	0	0	0	9	0	0	0	0	0	0	0	0	0	0	0	0	0	0	0	10	0	18	0	0	0	0	0	0	0	0	0	0	0
802	1-Nov-21	6:10:00	1	0	1	0	CT	0	0	0	0	0	0	0	0	0	0	0	0	0	0	0	10	0	0	0	0	22	0	1	0	0	5	46	0	0	0	0	0	29	0
803	1-Nov-21	6:15:00	1	0	1	0	CT	0	0	0	0	0	0	0	0	0	0	0	0	0	1	0	0	0	0	0	0	0	0	0	0	0	0	15	0	0	0	0	6	0	0
804	1-Nov-21	6:20:00	1	0	1	0	CT	0	0	0	0	0	0	0	0	0	20	0	0	0	0	0	0	0	0	1	0	0	0	0	0	0	0	0	0	0	0	0	58	0	0
805	1-Nov-21	6:25:00	1	0	1	0	CT	0	0	0	0	0	2	0	0	0	54	0	0	0	0	0	0	0	0	0	0	15	0	0	0	0	0	0	4	63	0	0	16	0	0
806	1-Nov-21	6:30:00	1	0	1	0	CT	0	0	0	0	0	0	0	0	0	2	0	0	0	1	0	0	0	0	0	0	0	0	0	0	0	0	0	57	0	0	0	0	0	0
807	1-Nov-21	6:35:00	1	0	1	0	CT	0	0	0	0	0	0	0	0	0	0	0	0	0	1	0	0	0	0	0	0	0	0	0	0	0	0	0	40	0	0	0	4	0	0
808	1-Nov-21	6:40:00	1	0	1	0	CT	0	0	0	0	0	0	47	0	0	0	0	0	1	0	0	0	0	0	0	0	0	0	0	0	0	0	55	82	0	0	10	10	0	0
809	1-Nov-21	6:45:00	1	0	1	0	CT	0	0	0	10	0	0	92	0	0	0	0	0	0	2	0	0	0	0	14	0	0	0	0	0	0	1	54	100	0	0	23	0	0	0
810	1-Nov-21	6:50:00	1	0	1	0	CT	0	0	0	91	0	0	104	0	4	0	0	46	0	1	0	0	0	28	9	0	0	22	1	0	0	10	29	56	0	0	42	0	0	0
811	1-Nov-21	6:55:00	1	0	1	0	CT	0	0	0	58	0	0	72	0	0	0	0	97	27	0	0	0	0	9	0	0	34	19	2	0	0	0	0	32	0	0	0	0	0	0
812	1-Nov-21	7:00:00	1	0	1	0	CT	0	0	8	52	0	39	21	0	0	0	0	49	0	22	0	0	0	48	53	0	68	0	0	0	0	5	0	32	0	0	0	0	0	0
813	1-Nov-21	7:05:00	1	0	1	0	CT	0	0	25	3	0	45	0	0	0	0	0	32	0	60	0	0	0	0	0	0	4	0	0	0	0	3	0	42	0	0	0	2	0	0
814	1-Nov-21	7:10:00	1	0	1	0	CT	0	0	0	0	0	25	0	0	0	0	0	0	0	25	0	29	0	0	0	0	20	0	0	0	0	4	0	0	0	0	0	0	1	0
815	1-Nov-21	7:15:00	1	0	1	0	CT	0	0	0	0	0	0	6	0	0	0	6	3	0	12	0	51	0	0	19	0	15	1	0	9	0	0	0	0	0	0	0	0	0	0
816	1-Nov-21	7:20:00	1	0	1	0	CT	0	0	0	0	0	0	0	8	69	0	23	0	0	0	0	70	7	0	0	0	0	0	0	0	0	1	0	0	52	118	55	1	0	0
817	1-Nov-21	7:25:00	1	0	1	0	CT	0	0	0	0	0	0	0	87	22	1	0	0	0	0	0	33	0	0	0	0	0	0	0	42	0	9	0	0	7	101	14	0	0	0
818	1-Nov-21	7:30:00	1	0	1	0	CT	0	0	0	0	0	0	0	71	0	4	0	7	3	0	0	0	0	0	0	65	0	0	0	68	29	82	0	2	0	103	4	0	0	4
819	1-Nov-21	7:35:00	1	0	1	0	CT	0	0	0	0	0	0	0	55	0	14	0	0	0	1	0	0	0	0	0	47	15	0	0	77	72	32	0	0	0	11	7	0	0	99
820	1-Nov-21	7:40:00	1	0	1	0	CT	0	0	17	0	34	0	0	76	0	33	7	0	1	22	0	0	0	0	0	5	0	0	0	115	82	0	0	0	0	6	1	0	0	12
821	1-Nov-21	7:45:00	1	0	1	0	CT	0	0	38	0	76	0	0	72	0	0	0	57	0	65	0	0	0	0	0	0	0	0	0	87	13	62	0	19	2	0	0	0	0	0
822	1-Nov-21	7:50:00	1	0	1	0	CT	0	0	0	0	44	0	0	0	0	0	0	50	0	97	0	0	6	0	8	0	0	0	0	51	0	1	55	0	81	0	0	0	0	0
823	1-Nov-21	7:55:00	1	0	1	0	CT	0	0	0	0	62	0	0	0	16	0	0	0	1	49	0	0	0	0	0	0	0	1	0	0	0	0	5	0	92	41	0	0	7	0
824	1-Nov-21	8:00:00	1	0	1	0	CT	0	0	1	0	0	0	10	0	0	48	0	0	0	99	0	0	0	0	0	0	1	0	0	0	0	1	0	0	78	0	0	1	137	0
825	1-Nov-21	8:05:00	1	0	1	0	CT	0	0	2	0	0	0	71	0	0	82	0	50	0	88	0	0	0	0	1	0	0	0	0	0	0	0	56	0	24	0	0	2	120	0
826	1-Nov-21	8:10:00	1	0	1	0	CT	0	0	66	0	0	4	73	0	0	14	0	0	21	26	0	0	0	21	7	0	0	8	0	0	0	0	91	0	0	0	0	0	100	61
827	1-Nov-21	8:15:00	1	0	1	0	CT	0	0	50	0	10	63	0	0	0	0	0	0	108	2	0	0	0	13	63	0	59	20	0	0	0	0	0	5	0	32	0	0	119	79
828	1-Nov-21	8:20:00	1	0	1	0	CT	0	1	37	37	48	83	68	0	102	17	15	50	132	19	32	34	55	47	94	49	69	72	74	61	83	22	70	58	81	134	54	65	152	78
829	1-Nov-21	8:25:00	1	0	1	0	CT	0	1	67	36	93	77	84	0	115	14	24	79	111	0	48	40	101	58	109	66	79	80	68	37	85	54	77	85	100	129	87	63	3	93
830	1-Nov-21	8:30:00	1	0	1	0	CT	0	1	44	32	2	98	89	7	120	0	76	64	91	11	8	62	72	30	95	31	97	1	47	35	94	87	70	56	81	94	54	104	19	98
831	1-Nov-21	8:35:00	1	0	1	0	CT	0	1	45	64	0	67	58	26	116	18	62	61	82	83	14	52	84	77	115	46	90	0	36	66	81	69	83	57	76	92	72	94	102	105
832	1-Nov-21	8:40:00	1	0	1	0	CT	0	1	5	42	0	86	55	21	83	40	41	52	118	54	4	78	48	88	86	47	56	0	46	78	71	83	81	63	81	92	66	83	89	85
833	1-Nov-21	8:45:00	1	0	1	0	CT	0	1	4	52	3	47	59	31	70	70	0	31	120	69	0	75	83	25	100	73	75	40	76	38	73	91	57	50	84	109	24	75	9	109
834	1-Nov-21	8:50:00	1	0	1	0	CT	0	1	89	51	42	78	7	25	0	45	2	44	84	1	25	77	79	15	83	50	62	102	66	22	53	78	52	80	85	64	6	72	66	100
835	1-Nov-21	8:55:00	1	0	1	0	CT	0	1	84	61	71	68	0	0	0	25	0	74	111	0	22	89	48	24	81	70	43	69	57	4	65	88	42	53	77	105	26	60	71	100
836	1-Nov-21	9:00:00	1	0	1	0	CT	0	1	61	23	71	42	0	0	13	44	6	7	80	0	35	45	58	39	38	56	49	2	36	0	44	11	79	40	58	137	10	87	41	85
837	1-Nov-21	9:05:00	1	0	1	0	CT	0	1	46	50	30	62	2	6	122	34	43	23	101	0	0	28	50	22	0	50	39	4	12	0	51	0	63	42	78	97	0	46	67	82
838	1-Nov-21	9:10:00	1	0	1	0	CT	0	1	25	57	0	73	102	16	99	16	72	47	80	0	2	0	56	4	0	17	45	94	2	0	37	0	13	4	29	33	4	94	97	73
839	1-Nov-21	9:15:00	1	0	1	0	CT	0	1	1	37	0	2	54	0	16	2	39	24	103	0	0	0	90	0	17	0	41	87	0	0	62	40	49	0	0	11	2	48	134	103
840	1-Nov-21	9:20:00	1	0	1	0	CT	0	1	1	16	0	0	44	3	0	51	0	0	99	2	11	1	69	2	88	0	41	28	22	0	38	26	30	0	2	10	17	2	120	67
841	1-Nov-21	9:25:00	1	0	1	0	CT	0	1	59	31	0	0	0	0	0	49	0	2	76	21	3	58	53	4	97	0	0	24	7	67	42	3	45	14	7	6	45	66	112	56
842	1-Nov-21	9:30:00	1	0	1	0	CT	0	1	59	55	0	69	0	0	0	34	0	74	57	9	2	86	70	0	90	27	26	1	0	68	0	0	63	63	1	18	53	71	110	91
843	1-Nov-21	9:35:00	1	0	1	0	CT	0	1	64	63	0	54	0	0	0	51	0	60	83	12	23	72	19	0	55	49	10	0	12	46	0	0	75	35	88	22	49	22	96	95
844	1-Nov-21	9:40:00	1	0	1	0	CT	0	1	48	0	0	0	0	1	3	7	0	43	7	16	7	68	0	0	32	41	0	0	1	16	0	0	38	67	119	18	53	1	125	86
845	1-Nov-21	9:45:00	1	0	1	0	CT	0	1	0	0	0	0	0	0	0	13	0	20	0	2	18	0	1	0	0	0	0	0	6	0	0	115	96	10	11	11	0	24	106	50
846	1-Nov-21	9:50:00	1	0	1	0	CT	0	1	1	1	0	16	0	0	0	0	0	0	0	26	0	0	0	0	0	1	58	0	0	0	0	110	15	0	0	11	0	59	75	68
847	1-Nov-21	9:55:00	1	0	1	0	CT	0	1	0	0	0	91	0	0	0	0	0	0	1	0	0	0	1	0	0	0	28	0	8	0	0	58	66	0	0	40	4	19	31	64
848	1-Nov-21	10:00:00	1	0	1	0	CT	0	1	0	0	0	38	0	0	0	0	0	0	0	31	0	0	0	0	0	13	1	0	15	0	0	43	46	0	0	9	43	0	85	36
849	1-Nov-21	10:05:00	1	0	1	0	CT	0	1	0	0	0	0	30	0	0	40	0	0	0	4	1	0	1	0	0	44	0	0	21	0	0	12	50	0	16	19	44	2	47	51
850	1-Nov-21	10:10:00	1	0	1	0	CT	0	1	0	0	0	0	62	11	0	41	1	0	54	25	0	84	16	0	24	68	0	0	6	0	0	6	13	0	70	29	19	33	39	50
851	1-Nov-21	10:15:00	1	0	1	0	CT	0	1	3	0	0	0	64	50	0	36	0	0	75	66	13	2	87	13	91	11	0	2	0	3	7	3	5	0	5	10	0	62	63	31
852	1-Nov-21	10:20:00	1	0	1	0	CT	0	1	0	0	6	0	33	13	19	12	55	0	68	37	13	11	56	45	92	0	0	9	5	0	64	0	54	0	0	6	0	36	59	63
853	1-Nov-21	10:25:00	1	0	1	0	CT	0	1	0	0	55	0	0	25	54	30	77	0	88	19	1	0	47	32	35	0	0	0	10	2	33	0	24	0	0	6	0	41	32	57
854	1-Nov-21	10:30:00	1	0	1	0	CT	0	1	0	0	67	0	0	2	74	26	70	13	58	26	10	0	61	0	0	0	0	65	1	53	0	0	69	0	2	12	0	17	50	51
855	1-Nov-21	10:35:00	1	0	1	0	CT	0	1	2	0	73	0	0	23	13	0	44	8	24	19	3	5	64	0	0	0	0	72	14	55	0	0	61	0	0	21	0	2	26	0
856	1-Nov-21	10:40:00	1	0	1	0	CT	0	1	48	0	23	16	0	3	0	9	23	10	6	5	16	19	20	0	0	0	0	9	5	24	18	0	26	0	0	0	0	0	44	0
857	1-Nov-21	10:45:00	1	0	1	0	CT	0	1	74	5	1	8	0	38	0	0	45	0	8	5	14	37	48	0	0	0	0	7	10	31	8	0	51	0	0	5	10	11	14	0
858	1-Nov-21	10:50:00	1	0	1	0	CT	0	1	31	27	38	2	0	10	1	0	0	17	0	1	1	53	46	0	0	0	0	53	6	9	4	41	49	0	0	9	85	2	1	0
859	1-Nov-21	10:55:00	1	0	1	0	CT	0	1	0	77	59	0	14	44	19	0	0	5	0	33	1	67	58	0	11	1	3	55	0	45	7	82	35	0	0	22	51	47	0	0
860	1-Nov-21	11:00:00	1	0	1	0	CT	0	1	0	26	6	0	62	6	11	0	0	9	0	77	1	51	23	0	0	27	4	0	0	0	7	58	63	0	0	5	58	35	50	0
861	1-Nov-21	11:05:00	1	0	1	0	CT	0	1	0	0	0	9	2	19	0	0	0	3	0	33	2	65	0	0	5	31	54	0	0	0	2	31	20	3	7	17	81	47	15	55
862	1-Nov-21	11:10:00	1	0	1	0	CT	0	1	0	0	0	15	1	10	8	0	0	13	0	42	10	69	0	0	18	26	68	6	1	1	3	60	70	8	101	28	9	38	62	58
863	1-Nov-21	11:15:00	1	0	1	0	CT	0	1	0	0	0	1	0	15	5	0	0	3	0	11	0	59	0	0	0	5	56	0	2	0	0	3	56	8	69	1	1	24	51	24
864	1-Nov-21	11:20:00	1	0	1	0	CT	0	1	20	0	8	0	0	13	3	14	0	0	0	21	4	0	0	0	4	9	1	0	7	2	0	1	31	1	3	17	41	6	11	0
865	1-Nov-21	11:25:00	1	0	1	0	CT	0	1	0	0	0	0	1	0	0	22	0	0	0	43	2	0	0	0	0	7	0	0	0	0	0	41	0	1	1	9	59	57	57	0
866	1-Nov-21	11:30:00	1	0	1	0	CT	0	1	40	0	0	4	0	2	10	16	0	0	0	17	11	12	0	0	0	0	0	0	19	7	5	0	0	6	3	18	0	18	34	0
867	1-Nov-21	11:35:00	1	0	1	0	CT	0	1	80	0	0	6	0	17	8	0	0	0	0	20	12	13	0	1	0	1	0	0	14	57	1	0	0	12	3	10	0	0	75	0
868	1-Nov-21	11:40:00	1	0	1	0	CT	0	1	69	0	0	6	0	7	0	0	0	0	0	6	3	3	0	0	0	7	0	0	9	46	0	22	0	66	2	8	0	3	120	2
869	1-Nov-21	11:45:00	1	0	1	0	CT	0	1	48	0	0	3	0	13	0	0	0	8	76	13	10	27	2	0	12	8	17	0	0	26	13	0	0	13	0	41	0	0	116	1
870	1-Nov-21	11:50:00	1	0	1	0	CT	0	1	0	0	0	0	0	12	26	10	0	12	94	12	2	43	0	2	42	27	5	0	4	1	3	0	21	1	0	29	6	1	107	21
871	1-Nov-21	11:55:00	1	0	1	0	CT	0	1	9	0	0	0	0	0	0	23	0	14	33	0	0	41	2	28	5	10	8	1	0	4	9	0	41	0	2	8	7	0	85	41
872	1-Nov-21	12:00:00	1	0	1	0	CT	0	1	4	0	0	0	0	0	0	16	0	15	88	13	4	29	2	65	55	6	1	0	5	7	4	67	63	0	28	26	29	1	66	51
873	1-Nov-21	12:05:00	1	0	1	0	CT	0	1	0	0	0	0	0	0	0	0	0	0	81	13	3	53	0	17	81	9	2	1	63	1	3	62	58	6	65	35	66	28	0	43
874	1-Nov-21	12:10:00	1	0	1	0	CT	0	1	0	0	0	35	1	5	13	0	14	3	45	8	24	66	0	30	73	18	1	2	10	0	7	25	67	3	15	13	6	69	0	4
875	1-Nov-21	12:15:00	1	0	1	0	CT	0	1	16	0	14	25	0	38	14	25	52	7	38	16	19	0	0	65	75	11	3	3	6	0	2	2	63	10	6	1	0	26	0	22
876	1-Nov-21	12:20:00	1	0	1	0	CT	0	1	1	0	88	65	0	28	21	0	38	0	71	14	2	5	0	19	42	38	0	43	0	2	6	0	0	1	9	9	0	79	0	19
877	1-Nov-21	12:25:00	1	0	1	0	CT	0	1	9	0	65	1	0	13	13	55	0	0	24	22	0	0	2	7	0	2	1	27	2	6	7	0	0	2	2	13	0	47	33	3
878	1-Nov-21	12:30:00	1	0	1	0	CT	0	1	1	0	55	0	0	17	18	22	0	6	0	26	11	0	33	0	0	3	3	29	0	8	2	0	0	4	5	23	0	40	60	0
879	1-Nov-21	12:35:00	1	0	1	0	CT	0	1	0	0	26	0	0	15	5	60	0	10	0	47	78	0	84	0	0	8	2	17	0	0	5	0	0	12	0	7	8	0	142	4
880	1-Nov-21	12:40:00	1	0	1	0	CT	0	1	2	13	0	0	0	7	11	34	0	5	0	17	38	0	58	0	28	7	6	1	28	0	9	0	0	10	12	6	53	1	129	0
881	1-Nov-21	12:45:00	1	0	1	0	CT	0	1	0	58	0	5	10	9	74	63	0	4	0	49	6	8	67	1	61	0	2	1	5	4	3	0	0	8	15	30	63	3	107	13
882	1-Nov-21	12:50:00	1	0	1	0	CT	0	1	0	56	0	2	71	20	2	63	0	7	19	13	4	37	43	0	74	3	2	0	6	12	3	47	0	8	21	36	28	2	75	9
883	1-Nov-21	12:55:00	1	0	1	0	CT	0	1	9	7	0	10	68	10	0	0	0	2	78	13	5	2	2	0	62	9	14	0	15	12	6	36	0	4	13	20	39	0	72	8
884	1-Nov-21	13:00:00	1	0	1	0	CT	0	1	41	0	0	5	17	3	0	7	0	2	80	41	10	37	0	0	10	5	3	0	11	2	0	1	0	6	25	8	66	3	4	15
885	1-Nov-21	13:05:00	1	0	1	0	CT	0	1	57	0	0	2	0	15	0	0	0	0	50	55	12	31	4	0	0	17	1	0	4	10	8	22	0	3	15	10	81	27	1	12
886	1-Nov-21	13:10:00	1	0	1	0	CT	0	1	69	0	0	0	1	9	0	0	0	26	47	0	15	57	0	0	0	22	0	0	4	1	6	17	0	3	17	12	0	54	0	0
887	1-Nov-21	13:15:00	1	0	1	0	CT	0	1	33	0	0	7	0	0	10	0	11	11	0	2	0	81	0	32	0	13	10	0	9	5	4	0	0	4	13	27	0	39	42	0
888	1-Nov-21	13:20:00	1	0	1	0	CT	0	1	24	11	0	30	12	5	13	0	68	6	2	17	34	108	0	12	0	4	2	5	19	6	4	0	0	16	21	2	0	0	21	0
889	1-Nov-21	13:25:00	1	0	1	0	CT	0	1	25	0	4	47	14	21	22	0	39	0	18	0	33	21	12	0	0	0	3	0	5	11	10	0	0	1	5	7	5	2	28	3
890	1-Nov-21	13:30:00	1	0	1	0	CT	0	1	0	7	11	14	4	27	7	0	0	6	7	5	3	1	17	2	5	0	2	0	6	6	9	17	0	8	15	13	1	39	58	8
891	1-Nov-21	13:35:00	1	0	1	0	CT	0	1	0	32	95	0	12	47	0	19	0	6	11	11	22	1	0	0	0	0	0	9	3	59	3	2	0	2	8	11	0	72	29	4
892	1-Nov-21	13:40:00	1	0	1	0	CT	0	1	18	30	58	0	0	29	0	58	0	1	0	1	0	15	0	9	5	3	0	1	9	70	6	27	27	7	12	7	0	35	73	6
893	1-Nov-21	13:45:00	1	0	1	0	CT	0	1	68	33	34	0	2	23	0	25	0	7	5	5	1	0	51	40	0	10	7	5	17	42	0	5	69	42	55	9	9	9	45	11
894	1-Nov-21	13:50:00	1	0	1	0	CT	0	1	45	0	0	1	6	49	17	7	0	0	5	0	20	0	66	22	0	29	2	64	3	32	27	40	103	4	8	22	0	3	44	0
895	1-Nov-21	13:55:00	1	0	1	0	CT	0	1	0	1	0	6	5	25	14	15	0	2	18	0	2	10	57	49	15	13	1	33	11	32	3	18	49	0	0	26	0	4	20	8
896	1-Nov-21	14:00:00	1	0	1	0	CT	0	1	13	0	0	27	12	7	19	6	0	1	12	0	1	1	0	44	41	8	0	3	7	40	7	96	38	0	14	13	0	2	55	11
897	1-Nov-21	14:05:00	1	0	1	0	CT	0	1	0	1	0	0	8	13	15	45	2	2	11	21	12	0	0	33	88	6	5	44	5	4	4	88	64	0	8	10	1	0	28	9
898	1-Nov-21	14:10:00	1	0	1	0	CT	0	1	0	20	0	0	0	9	14	13	1	19	5	4	0	0	6	6	87	5	6	4	4	0	6	109	89	0	15	8	19	2	6	17
899	1-Nov-21	14:15:00	1	0	1	0	CT	0	1	0	2	0	1	0	8	0	12	3	14	10	0	0	0	8	0	23	2	0	3	9	8	7	42	92	0	11	24	42	57	0	10
900	1-Nov-21	14:20:00	1	0	1	0	CT	0	1	4	0	0	12	0	6	0	45	39	11	5	4	0	15	0	4	0	3	4	8	7	0	1	64	10	16	4	19	2	18	33	8
901	1-Nov-21	14:25:00	1	0	1	0	CT	0	1	12	0	0	9	0	25	1	48	43	5	25	6	21	4	0	0	0	13	0	3	4	1	11	53	64	30	13	16	16	23	51	12
902	1-Nov-21	14:30:00	1	0	1	0	CT	0	1	53	0	6	0	18	11	0	19	2	7	11	0	26	57	0	0	0	3	3	7	5	7	5	6	9	27	15	26	65	29	39	18
903	1-Nov-21	14:35:00	1	0	1	0	CT	0	1	67	0	0	0	3	7	0	0	0	12	14	0	12	47	0	0	0	5	7	0	3	24	5	1	65	83	18	15	74	0	32	6
904	1-Nov-21	14:40:00	1	0	1	0	CT	0	1	38	0	0	2	1	18	0	3	0	0	5	14	5	78	9	0	75	0	60	10	7	66	4	0	50	60	11	3	28	1	24	7
905	1-Nov-21	14:45:00	1	0	1	0	CT	0	1	4	0	7	1	14	6	0	0	0	0	6	53	5	24	7	5	64	0	52	13	0	29	7	0	50	42	8	4	0	3	19	9
906	1-Nov-21	14:50:00	1	0	1	0	CT	0	1	0	0	2	13	0	3	18	0	0	12	4	84	0	7	3	3	24	6	47	6	9	0	1	12	14	3	6	20	5	0	50	6
907	1-Nov-21	14:55:00	1	0	1	0	CT	0	1	0	2	0	61	0	6	46	0	0	6	10	2	17	0	7	7	0	3	68	0	8	0	6	21	46	5	15	9	1	2	44	1
908	1-Nov-21	15:00:00	1	0	1	0	CT	0	1	6	18	0	68	0	7	7	0	0	4	0	31	0	45	31	0	0	0	40	0	10	0	9	3	67	6	6	4	0	5	48	2
909	1-Nov-21	15:05:00	1	0	1	0	CT	0	1	5	49	0	55	0	20	5	0	22	2	2	18	23	35	87	3	0	0	43	0	6	1	7	2	66	0	17	20	0	24	11	4
910	1-Nov-21	15:10:00	1	0	1	0	CT	0	1	5	28	36	42	16	12	3	0	26	2	12	3	29	48	60	47	0	0	62	11	3	0	2	22	29	3	10	33	0	38	18	21
911	1-Nov-21	15:15:00	1	0	1	0	CT	0	1	0	66	96	2	0	0	8	0	21	0	91	1	22	45	29	36	0	19	22	14	0	1	0	0	63	0	6	22	0	46	42	8
912	1-Nov-21	15:20:00	1	0	1	0	CT	0	1	5	19	51	0	0	0	0	9	8	1	117	0	8	50	0	18	11	9	63	0	0	37	9	1	44	0	16	7	0	5	31	5
913	1-Nov-21	15:25:00	1	0	1	0	CT	0	1	2	0	0	0	0	15	0	4	0	4	73	12	1	0	0	11	12	23	63	14	6	51	1	15	0	21	12	14	22	3	26	20
914	1-Nov-21	15:30:00	1	0	1	0	CT	0	1	16	5	0	0	11	20	3	0	0	3	5	11	0	4	1	0	76	0	36	2	7	60	5	26	41	11	6	14	45	4	45	4
915	1-Nov-21	15:35:00	1	0	1	0	CT	0	1	67	5	0	0	10	0	11	0	8	9	0	4	6	28	0	0	72	9	29	0	10	48	4	50	54	9	8	22	0	3	137	3
916	1-Nov-21	15:40:00	1	0	1	0	CT	0	1	73	1	0	0	0	0	1	38	8	12	0	29	7	0	0	0	44	1	27	4	1	40	4	68	31	0	14	9	3	6	102	0
917	1-Nov-21	15:45:00	1	0	1	0	CT	0	1	67	13	1	0	0	4	7	14	5	11	0	67	7	22	0	0	40	6	0	9	16	0	4	64	0	0	6	15	3	42	113	4
918	1-Nov-21	15:50:00	1	0	1	0	CT	0	1	61	4	50	0	5	9	34	7	2	1	0	0	0	0	0	2	12	0	10	7	4	9	5	1	0	0	7	12	4	51	123	10
919	1-Nov-21	15:55:00	1	0	1	0	CT	0	1	7	7	78	17	0	0	38	0	3	0	0	2	0	17	0	1	14	5	10	9	8	40	5	13	35	6	0	23	1	14	49	24
920	1-Nov-21	16:00:00	1	0	1	0	CT	0	1	55	1	104	86	49	0	51	7	0	4	1	0	0	18	0	0	0	24	36	3	3	57	7	15	77	3	0	20	0	19	9	8
921	1-Nov-21	16:05:00	1	0	1	0	CT	0	1	65	0	27	81	71	12	27	55	6	9	50	0	0	2	2	0	0	49	1	0	5	40	5	20	34	9	18	9	4	10	0	16
922	1-Nov-21	16:10:00	1	0	1	0	CT	0	1	56	12	0	25	78	13	0	13	42	11	123	0	3	0	73	0	0	43	0	1	0	8	4	17	57	6	19	10	5	51	51	8
923	1-Nov-21	16:15:00	1	0	1	0	CT	0	1	0	7	0	2	38	9	4	0	72	6	59	2	24	5	39	0	0	49	3	1	12	0	6	12	30	3	12	16	0	28	68	4
924	1-Nov-21	16:20:00	1	0	1	0	CT	0	1	0	1	0	2	0	0	0	0	46	11	6	16	32	18	50	0	0	0	2	7	9	0	20	14	71	17	12	20	60	8	45	0
925	1-Nov-21	16:25:00	1	0	1	0	CT	0	1	0	0	0	0	0	0	0	0	0	7	0	2	19	19	0	0	0	0	7	4	5	0	9	0	21	2	9	12	74	29	35	2
926	1-Nov-21	16:30:00	1	0	1	0	CT	0	1	0	0	0	0	0	6	10	0	0	3	2	0	4	71	0	0	0	0	10	7	5	0	0	0	100	1	15	8	7	35	2	0
927	1-Nov-21	16:35:00	1	0	1	0	CT	0	1	0	0	0	9	0	21	29	25	0	2	1	0	38	42	1	0	7	0	5	7	5	0	0	1	80	0	5	17	0	1	0	0
928	1-Nov-21	16:40:00	1	0	1	0	CT	0	1	1	0	9	46	0	39	56	15	16	12	0	8	4	41	17	25	14	1	57	28	0	7	15	20	47	0	23	37	2	24	0	0
929	1-Nov-21	16:45:00	1	0	1	0	CT	0	1	0	0	8	65	0	12	94	16	76	67	0	54	10	48	91	74	73	30	87	43	0	46	98	35	58	0	101	97	52	39	58	38
930	1-Nov-21	16:50:00	1	0	1	0	CT	0	1	4	8	10	80	0	12	92	1	55	57	12	47	17	11	51	77	83	115	45	83	2	44	81	30	74	0	112	81	31	87	53	30
931	1-Nov-21	16:55:00	1	0	1	0	CT	0	1	0	35	28	6	6	51	94	14	57	57	11	0	4	24	53	16	78	44	50	70	26	12	73	7	42	19	68	32	69	0	62	15
932	1-Nov-21	17:00:00	1	0	1	0	CT	0	1	0	34	9	0	0	14	40	44	2	0	20	17	23	2	10	16	65	28	9	22	8	27	31	1	0	13	97	15	57	2	53	2
933	1-Nov-21	17:05:00	1	0	1	0	CT	0	1	52	1	2	8	0	6	0	29	0	0	84	0	13	0	0	1	0	0	1	64	36	11	42	19	0	6	9	16	7	8	12	10
934	1-Nov-21	17:10:00	1	0	1	0	CT	0	1	60	2	0	0	0	0	0	15	0	0	65	0	11	0	5	0	2	0	0	70	70	0	16	0	11	4	16	4	11	1	42	2
935	1-Nov-21	17:15:00	1	0	1	0	CT	0	1	19	0	0	2	0	11	1	39	0	0	104	40	1	0	3	0	27	0	31	25	73	0	5	0	28	16	16	50	6	1	40	14
936	1-Nov-21	17:20:00	1	0	1	0	CT	0	1	2	0	2	2	0	0	1	54	0	0	58	8	0	4	0	4	57	0	42	0	55	0	5	19	41	5	13	18	1	5	45	2
937	1-Nov-21	17:25:00	1	0	1	0	CT	0	1	10	0	10	27	0	0	17	63	0	0	1	3	3	4	0	10	64	0	0	0	61	0	13	14	17	9	24	27	13	19	14	10
938	1-Nov-21	17:30:00	1	0	1	0	CT	0	1	2	0	5	0	5	0	20	103	0	8	0	0	23	18	0	32	3	0	1	0	56	0	9	5	61	0	28	8	19	1	48	2
939	1-Nov-21	17:35:00	1	0	1	0	CT	0	1	0	0	2	0	65	0	7	41	0	1	6	1	2	9	1	28	0	0	38	0	7	0	1	0	40	0	12	23	64	0	26	28
940	1-Nov-21	17:40:00	1	0	1	0	CT	0	1	0	0	0	0	59	0	0	61	0	0	5	60	0	1	4	40	9	0	65	0	14	0	19	0	18	0	13	18	2	0	31	0
941	1-Nov-21	17:45:00	1	0	1	0	CT	0	1	0	0	0	0	8	0	12	29	0	0	7	34	14	29	50	13	0	0	36	0	1	0	0	0	63	0	12	12	4	0	15	13
942	1-Nov-21	17:50:00	1	0	1	0	CT	0	1	12	0	0	11	0	10	60	50	0	3	5	13	18	34	47	5	0	20	29	0	6	0	0	0	0	0	7	7	4	18	18	86
943	1-Nov-21	17:55:00	1	0	1	0	CT	0	1	60	0	0	50	0	13	29	18	44	0	0	0	0	68	42	0	0	41	2	0	0	0	0	25	0	0	4	0	0	72	14	57
944	1-Nov-21	18:00:00	1	0	1	0	CT	0	1	45	0	0	32	0	16	72	25	56	3	3	4	12	29	20	1	0	40	61	0	4	0	0	3	0	0	0	5	3	45	0	64
945	1-Nov-21	18:05:00	1	0	1	0	CT	0	1	4	0	0	3	0	0	98	46	10	13	0	25	10	0	0	15	0	30	26	41	1	0	85	0	0	0	5	21	29	39	0	37
946	1-Nov-21	18:10:00	1	0	1	0	CT	0	1	0	48	0	0	0	0	59	3	0	1	0	0	11	0	0	31	0	0	0	68	0	0	89	0	0	0	0	5	5	25	0	0
947	1-Nov-21	18:15:00	1	0	1	0	CT	0	1	0	38	0	0	0	0	3	27	0	0	15	19	8	0	0	5	13	0	0	8	27	0	13	0	0	0	0	1	1	42	0	0
948	1-Nov-21	18:20:00	1	0	1	0	CT	0	1	0	0	0	0	0	0	5	53	0	0	89	10	26	0	0	0	20	0	2	22	1	0	4	0	0	0	0	33	1	0	0	0
949	1-Nov-21	18:25:00	1	0	1	0	CT	0	1	0	0	0	0	0	0	1	39	0	0	82	31	20	0	0	0	0	0	2	25	2	0	0	0	0	20	0	14	38	13	0	0
950	1-Nov-21	18:30:00	1	0	1	0	CT	0	1	0	0	0	4	0	0	0	54	0	0	47	52	0	0	0	0	0	0	0	58	79	0	0	0	0	84	0	15	7	6	2	44
951	1-Nov-21	18:35:00	1	0	1	0	CT	0	1	0	12	0	0	0	0	0	16	39	0	2	21	7	0	0	1	2	0	53	0	44	0	0	0	3	63	0	0	0	1	0	42
952	1-Nov-21	18:40:00	1	0	1	0	CT	0	1	0	18	0	0	0	0	0	32	52	0	5	14	2	0	0	0	90	0	78	0	38	0	7	0	44	66	13	93	0	0	0	66
953	1-Nov-21	18:45:00	1	0	1	0	CT	0	1	0	0	0	0	10	0	0	0	19	0	1	35	2	8	0	1	0	0	49	20	51	0	81	0	58	0	5	92	0	0	0	15
954	1-Nov-21	18:50:00	1	0	1	0	CT	0	1	0	0	0	28	1	0	0	0	0	1	2	58	8	62	0	9	0	56	29	1	63	0	51	0	0	0	0	1	0	0	0	2
955	1-Nov-21	18:55:00	1	0	1	0	CT	0	1	0	21	54	78	0	32	0	0	0	0	63	0	0	66	3	5	59	11	55	39	49	0	45	33	8	0	95	3	0	2	0	0
956	1-Nov-21	19:00:00	1	0	1	0	CT	0	1	0	21	81	53	0	70	0	0	3	62	0	0	0	39	86	0	73	26	64	65	74	0	29	0	27	16	75	87	63	0	63	2
957	1-Nov-21	19:05:00	1	0	1	0	CT	0	1	0	0	9	44	6	33	0	0	51	46	0	0	0	2	70	0	36	9	50	56	78	0	49	0	79	1	11	49	3	1	67	4
958	1-Nov-21	19:10:00	1	0	1	0	CT	0	1	0	43	0	65	0	3	0	10	34	33	0	0	0	19	17	47	69	0	83	6	23	0	30	18	33	5	1	24	49	1	118	0
959	1-Nov-21	19:15:00	1	0	1	0	CT	0	1	0	20	0	42	0	25	0	39	87	53	73	13	0	7	0	14	46	68	73	0	6	0	28	76	40	35	1	6	72	0	105	30
960	1-Nov-21	19:20:00	1	0	1	0	CT	0	1	55	3	0	47	0	12	46	33	0	25	90	64	37	79	0	53	0	34	2	0	69	0	67	51	37	36	2	88	2	0	58	83
961	1-Nov-21	19:25:00	1	0	1	0	CT	0	1	57	32	23	31	0	41	78	42	63	55	73	16	45	31	0	9	69	36	48	3	56	0	73	54	87	0	56	72	0	3	0	85
962	1-Nov-21	19:30:00	1	0	1	0	CT	0	1	40	10	83	44	0	11	39	81	86	91	98	15	9	21	43	63	51	16	67	76	27	0	34	66	50	19	108	8	9	72	33	23
963	1-Nov-21	19:35:00	1	0	1	0	CT	0	1	19	41	10	36	78	21	0	66	39	37	68	62	8	0	70	67	67	16	28	82	75	0	80	1	104	45	21	43	60	40	127	0
964	1-Nov-21	19:40:00	1	0	1	0	CT	0	1	8	3	77	60	71	17	2	63	38	29	0	55	1	26	44	34	49	27	84	32	24	16	61	0	56	0	6	16	47	45	99	0
965	1-Nov-21	19:45:00	1	0	1	0	CT	0	1	68	26	7	38	80	25	51	49	30	12	49	0	68	26	56	12	35	33	52	47	36	56	47	6	48	49	92	96	30	3	97	43
966	1-Nov-21	19:50:00	1	0	1	0	CT	0	1	58	18	44	64	53	39	87	13	44	71	103	0	81	37	37	0	61	6	73	67	80	57	57	37	75	38	20	3	41	0	42	54
967	1-Nov-21	19:55:00	1	0	1	0	CT	0	1	33	41	65	49	60	65	60	18	47	84	78	0	32	38	51	24	64	17	76	89	69	63	83	76	94	37	47	49	47	69	104	0
968	1-Nov-21	20:00:00	1	0	1	0	CT	0	1	94	11	64	60	5	63	20	0	53	35	28	5	40	23	5	54	24	40	54	6	80	30	59	39	51	42	28	88	22	71	67	52
969	1-Nov-21	20:05:00	1	0	1	0	CT	0	1	60	76	35	52	85	50	95	48	38	35	102	88	74	24	36	63	75	38	78	14	50	62	45	56	51	3	66	69	75	53	4	90
970	1-Nov-21	20:10:00	1	0	1	0	CT	0	1	46	40	40	44	24	0	36	8	56	51	76	56	90	77	64	82	43	6	62	50	90	23	35	69	104	64	58	36	40	43	53	53
971	1-Nov-21	20:15:00	1	0	1	0	CT	0	1	46	25	31	48	46	48	0	65	44	50	71	0	84	84	72	65	75	52	57	42	50	0	3	50	78	66	30	67	53	2	50	0
972	1-Nov-21	20:20:00	1	0	1	0	CT	0	1	86	79	94	112	114	78	158	43	96	97	165	72	120	70	107	47	120	102	74	75	110	77	95	53	67	82	100	127	103	80	171	121
973	1-Nov-21	20:25:00	1	0	1	0	CT	0	0	93	73	87	117	137	104	157	41	103	91	172	118	147	122	113	68	169	115	77	108	91	69	95	110	80	93	107	134	77	76	175	113
974	1-Nov-21	20:30:00	1	0	1	0	CT	0	0	85	60	78	98	117	68	142	32	82	76	140	78	118	114	82	68	110	86	89	69	76	49	68	114	77	75	81	119	99	55	140	126
975	1-Nov-21	20:35:00	1	0	1	0	CT	0	0	86	66	77	98	111	76	168	7	63	72	138	10	137	71	64	75	130	71	90	72	68	39	85	108	80	75	106	106	78	57	147	102
976	1-Nov-21	20:40:00	1	0	1	0	CT	0	0	97	55	84	88	114	90	145	44	58	84	121	0	140	90	72	78	143	93	85	78	69	38	71	115	83	71	91	117	81	64	101	82
977	1-Nov-21	20:45:00	1	0	1	0	CT	0	0	98	50	90	97	114	81	158	57	59	69	123	0	136	89	71	36	142	104	81	77	72	42	74	96	87	79	92	103	90	64	117	85
978	1-Nov-21	20:50:00	1	0	1	0	CT	0	0	101	55	69	78	91	77	155	63	47	67	117	0	121	104	72	24	131	87	62	102	74	55	60	96	65	64	101	96	85	63	126	90
979	1-Nov-21	20:55:00	1	0	1	0	CT	0	0	80	69	74	99	104	70	151	51	46	60	118	0	136	67	75	58	120	95	73	70	70	52	71	111	33	85	93	118	42	80	143	105
980	1-Nov-21	21:00:00	1	0	1	0	CT	0	0	75	49	62	86	89	88	184	0	16	66	79	0	123	96	70	71	103	99	99	71	80	53	61	98	71	76	96	108	90	99	125	107
981	1-Nov-21	21:05:00	1	0	1	0	CT	0	0	83	60	79	90	97	71	148	0	0	69	96	0	122	108	78	60	113	88	80	41	76	41	62	91	63	54	92	107	30	98	113	98
982	1-Nov-21	21:10:00	1	0	1	0	CT	0	0	99	19	56	83	73	58	171	0	0	103	121	0	103	68	56	63	109	83	80	84	77	63	58	104	46	62	89	101	0	85	108	123
983	1-Nov-21	21:15:00	1	0	1	0	CT	0	0	72	8	0	48	102	81	180	0	14	79	24	0	130	0	65	39	105	65	27	71	69	33	87	112	0	66	75	96	0	89	72	113
984	1-Nov-21	21:20:00	1	0	1	0	CT	0	0	94	18	58	79	80	81	157	0	0	72	12	0	123	0	69	0	72	114	11	119	63	43	42	1	0	69	84	119	0	78	24	98
985	1-Nov-21	21:25:00	1	0	1	0	CT	0	0	87	0	43	71	67	41	172	0	0	79	0	0	109	0	52	0	101	47	0	67	53	15	0	12	0	50	85	89	0	68	0	83
986	1-Nov-21	21:30:00	1	0	1	0	CT	0	0	72	0	59	8	73	0	159	0	0	69	0	0	121	0	0	0	9	0	0	7	12	0	0	2	0	63	91	30	0	53	0	75
987	1-Nov-21	21:35:00	1	0	1	0	CT	0	0	18	0	0	0	6	0	140	0	0	33	0	0	120	0	0	0	0	0	0	0	0	0	0	0	0	63	8	0	0	94	0	119
988	1-Nov-21	21:40:00	1	0	1	0	CT	0	0	0	0	0	0	0	0	174	0	0	0	0	0	112	0	0	0	0	0	0	0	0	0	0	0	0	0	0	0	0	66	0	103
989	1-Nov-21	21:45:00	1	0	1	0	CT	0	0	0	0	0	0	0	0	164	0	0	0	0	0	92	0	0	0	0	0	0	0	0	1	0	0	0	0	10	0	0	72	0	77
990	1-Nov-21	21:50:00	1	0	1	0	CT	0	0	0	0	0	0	0	0	182	0	0	0	62	0	88	0	0	0	0	0	0	0	0	0	0	0	0	0	16	0	0	36	0	68
991	1-Nov-21	21:55:00	1	0	1	0	CT	0	0	0	0	0	0	0	0	161	0	0	0	114	0	1	0	0	0	0	0	0	0	0	0	0	0	39	0	0	0	0	0	0	94
992	1-Nov-21	22:00:00	1	0	1	0	CT	0	0	0	0	0	0	0	0	97	0	0	0	127	0	0	0	0	0	0	0	0	0	0	0	0	0	15	0	1	0	0	0	0	62
993	1-Nov-21	22:05:00	1	0	1	0	CT	0	0	0	0	0	0	0	0	155	0	0	0	27	0	0	0	0	0	0	0	0	0	0	0	0	0	0	0	0	0	0	0	0	100
994	1-Nov-21	22:10:00	1	0	1	0	CT	0	0	0	0	0	0	0	0	47	0	0	0	0	0	0	0	0	0	0	0	0	0	0	0	0	0	0	0	0	0	0	0	0	64
995	1-Nov-21	22:15:00	1	0	1	0	CT	0	0	0	0	0	0	0	0	131	0	0	0	0	0	0	0	0	0	0	0	0	0	0	0	0	0	0	0	0	0	0	0	0	81
996	1-Nov-21	22:20:00	1	0	1	0	CT	0	0	0	0	0	0	0	0	71	0	0	0	0	0	0	0	0	0	0	0	0	0	0	10	0	0	0	0	0	0	0	0	0	2
997	1-Nov-21	22:25:00	1	0	1	0	CT	0	0	0	0	0	0	0	6	0	0	0	0	0	0	0	0	0	0	0	0	0	0	0	0	0	0	0	9	40	0	0	0	0	0
998	1-Nov-21	22:30:00	1	0	1	0	CT	0	0	0	0	0	0	0	0	0	0	0	0	0	0	0	0	0	0	0	0	0	0	0	0	0	0	0	0	102	0	0	0	0	0
999	1-Nov-21	22:35:00	1	0	1	0	CT	0	0	0	0	0	0	0	0	0	0	0	0	0	0	0	0	0	0	0	0	0	0	0	1	0	37	0	0	66	0	0	0	0	0
1000	1-Nov-21	22:40:00	1	0	1	0	CT	0	0	0	0	0	0	0	0	0	0	0	0	1	2	0	0	0	0	0	0	0	0	0	0	0	0	0	0	0	0	0	0	0	0
1001	1-Nov-21	22:45:00	1	0	1	0	CT	0	0	0	0	0	0	0	0	0	0	0	0	0	0	0	0	0	0	0	0	0	0	0	0	0	10	0	0	0	0	0	0	0	0
1002	1-Nov-21	22:50:00	1	0	1	0	CT	0	0	0	0	0	0	0	0	0	0	0	0	0	0	0	0	0	0	0	0	0	0	0	0	0	0	0	0	0	0	0	0	0	0
1003	1-Nov-21	22:55:00	1	0	1	0	CT	0	0	0	0	0	0	0	1	0	0	0	0	0	0	0	0	0	0	38	0	0	0	0	0	0	0	0	0	0	4	0	0	0	0
1004	1-Nov-21	23:00:00	1	0	1	0	CT	0	0	0	0	0	0	4	0	0	0	0	0	0	0	0	0	0	0	0	0	0	0	0	3	0	0	0	0	1	1	0	0	0	0
1005	1-Nov-21	23:05:00	1	0	1	0	CT	0	0	0	0	0	0	7	1	0	0	0	0	0	0	0	0	0	0	0	0	0	0	0	0	0	0	0	0	0	0	0	0	0	0
1006	1-Nov-21	23:10:00	1	0	1	0	CT	0	0	0	0	0	0	0	9	0	0	0	0	0	0	0	0	0	0	0	0	0	0	0	0	0	0	0	0	0	0	0	0	0	0
1007	1-Nov-21	23:15:00	1	0	1	0	CT	0	0	0	0	0	0	0	0	0	0	0	0	0	1	0	0	0	0	0	0	0	0	0	0	0	0	0	0	51	0	0	0	0	0
1008	1-Nov-21	23:20:00	1	0	1	0	CT	0	0	0	0	0	0	0	0	0	0	0	0	0	0	0	0	0	0	0	0	0	0	0	0	0	0	12	0	1	0	0	0	0	0
1009	1-Nov-21	23:25:00	1	0	1	0	CT	0	0	22	0	0	0	0	0	0	0	0	0	0	0	0	0	0	0	0	0	0	0	0	0	0	0	70	0	0	0	0	0	0	0
1010	1-Nov-21	23:30:00	1	0	1	0	CT	0	0	16	0	3	0	0	0	0	0	0	0	0	0	0	0	0	0	0	0	0	0	0	0	0	0	74	0	0	0	0	0	0	0
1011	1-Nov-21	23:35:00	1	0	1	0	CT	0	0	0	0	0	0	0	4	1	2	0	0	0	0	0	0	0	0	0	0	0	0	0	0	0	0	0	0	0	0	0	0	0	0
1012	1-Nov-21	23:40:00	1	0	1	0	CT	0	0	0	0	0	0	0	15	0	0	5	0	0	0	0	0	0	0	0	0	0	0	0	0	0	0	4	0	2	0	0	0	0	0
1013	1-Nov-21	23:45:00	1	0	1	0	CT	0	0	2	0	0	0	0	0	0	0	4	0	0	0	0	0	0	0	0	0	0	0	0	0	0	0	0	0	0	0	0	0	0	0
1014	1-Nov-21	23:50:00	1	0	1	0	CT	0	0	0	0	2	0	0	0	0	0	0	0	0	0	0	0	0	0	0	0	0	0	0	0	0	0	0	0	0	0	0	0	0	0
1015	1-Nov-21	23:55:00	1	0	1	0	CT	0	0	0	0	0	0	0	0	0	0	0	0	0	1	0	0	0	0	0	0	0	0	0	0	0	0	0	0	2	0	0	0	0	0
1016	2-Nov-21	0:00:00	1	0	1	0	CT	0	0	0	6	0	0	0	0	0	12	0	0	0	0	0	0	0	0	0	0	6	0	0	0	0	0	0	0	0	0	0	0	0	0
1017	2-Nov-21	0:05:00	1	0	1	0	CT	0	0	22	85	0	0	0	0	0	58	3	0	2	0	0	0	0	0	0	0	0	0	0	0	0	0	0	31	0	0	0	0	0	0
1018	2-Nov-21	0:10:00	1	0	1	0	CT	0	0	0	66	0	0	0	0	0	21	0	0	25	1	0	0	0	0	0	0	0	0	0	0	0	0	37	0	0	0	0	0	0	0
1019	2-Nov-21	0:15:00	1	0	1	0	CT	0	0	0	57	0	0	0	0	0	40	0	0	1	0	0	0	0	0	0	0	0	0	0	0	26	0	27	0	0	0	0	0	0	0
1020	2-Nov-21	0:20:00	1	0	1	0	CT	0	0	13	26	1	0	0	0	0	23	0	0	0	0	0	0	0	0	0	0	0	0	0	0	0	0	41	0	0	0	0	0	0	0
1021	2-Nov-21	0:25:00	1	0	1	0	CT	0	0	20	63	0	0	48	0	0	32	0	0	0	0	0	0	0	0	0	0	0	0	3	0	0	0	33	0	0	0	0	0	0	0
1022	2-Nov-21	0:30:00	1	0	1	0	CT	0	0	0	0	0	0	0	0	0	48	0	0	0	0	0	24	0	0	0	0	0	0	3	0	0	67	0	0	0	0	0	0	0	0
1023	2-Nov-21	0:35:00	1	0	1	0	CT	0	0	0	0	0	0	0	0	0	5	0	0	0	0	0	7	0	0	0	0	0	0	0	0	0	1	2	0	0	21	0	0	0	0
1024	2-Nov-21	0:40:00	1	0	1	0	CT	0	0	0	0	0	0	0	0	0	35	0	0	0	0	0	0	0	0	5	0	0	0	0	0	0	0	2	0	0	63	0	0	0	0
1025	2-Nov-21	0:45:00	1	0	1	0	CT	0	0	2	0	0	0	0	0	0	15	0	0	0	0	0	0	0	0	14	0	0	0	0	0	0	0	0	0	0	0	0	0	0	0
1026	2-Nov-21	0:50:00	1	0	1	0	CT	0	0	0	1	0	0	0	20	0	38	0	0	0	0	0	0	0	0	0	0	0	0	0	0	0	0	0	1	0	0	0	0	0	0
1027	2-Nov-21	0:55:00	1	0	1	0	CT	0	0	0	0	1	0	0	0	0	7	0	0	9	0	0	0	0	0	0	0	0	0	0	0	0	0	0	0	0	0	0	0	0	0
1028	2-Nov-21	1:00:00	1	0	1	0	CT	0	0	0	0	0	0	0	0	0	2	0	0	77	0	0	0	0	0	0	0	0	0	0	0	0	18	0	0	7	0	0	0	0	0
1029	2-Nov-21	1:05:00	1	0	1	0	CT	0	0	0	0	0	0	14	0	0	0	0	0	90	0	0	0	0	0	0	0	0	0	0	0	0	14	0	0	107	0	0	0	0	0
1030	2-Nov-21	1:10:00	1	0	1	0	CT	0	0	9	0	0	0	0	0	0	0	0	0	118	0	0	0	0	0	0	22	0	0	0	0	0	0	0	0	85	0	0	0	0	0
1031	2-Nov-21	1:15:00	1	0	1	0	CT	0	0	61	0	0	0	0	0	0	0	0	0	85	0	0	0	0	0	0	21	0	1	0	0	0	0	0	0	11	0	0	0	0	0
1032	2-Nov-21	1:20:00	1	0	1	0	CT	0	0	39	0	0	0	0	0	0	0	0	0	72	0	0	0	0	0	0	0	0	27	0	0	3	0	43	50	1	0	0	0	0	0
1033	2-Nov-21	1:25:00	1	0	1	0	CT	0	0	1	0	0	0	0	0	0	0	21	0	92	0	0	0	0	0	0	0	0	0	0	0	0	0	48	0	0	0	0	0	0	0
1034	2-Nov-21	1:30:00	1	0	1	0	CT	0	0	0	10	0	0	0	0	0	0	1	0	16	0	0	0	0	0	0	0	6	0	0	0	0	0	1	0	0	0	0	0	20	0
1035	2-Nov-21	1:35:00	1	0	1	0	CT	0	0	0	2	0	0	0	0	0	0	0	0	2	0	0	0	0	0	0	0	17	0	0	0	0	0	1	0	0	1	0	0	115	0
1036	2-Nov-21	1:40:00	1	0	1	0	CT	0	0	5	0	0	0	0	35	0	0	0	0	0	0	0	0	0	0	0	0	0	0	0	0	0	0	0	0	2	0	0	0	2	37
1037	2-Nov-21	1:45:00	1	0	1	0	CT	0	0	0	0	0	0	0	0	0	0	0	0	0	0	0	28	0	0	0	0	0	0	0	0	0	0	0	0	0	0	0	0	0	0
1038	2-Nov-21	1:50:00	1	0	1	0	CT	0	0	0	0	0	0	0	3	0	0	0	0	0	0	0	0	0	0	0	0	0	0	0	0	0	0	0	0	0	0	0	0	0	0
1039	2-Nov-21	1:55:00	1	0	1	0	CT	0	0	0	0	0	0	0	0	0	48	0	0	0	0	0	1	0	0	0	0	0	0	0	0	0	0	0	0	47	0	0	0	0	0
1040	2-Nov-21	2:00:00	1	0	1	0	CT	0	0	0	0	0	0	0	0	0	38	0	0	0	0	0	0	0	0	0	0	0	0	0	0	0	0	44	0	106	1	0	0	0	0
1041	2-Nov-21	2:05:00	1	0	1	0	CT	0	0	0	0	0	0	0	0	0	22	0	0	0	0	0	0	0	0	0	0	0	0	0	0	0	0	0	0	105	0	0	0	7	0
1042	2-Nov-21	2:10:00	1	0	1	0	CT	0	0	0	0	0	0	0	0	0	0	0	0	0	0	0	0	0	0	0	0	0	0	0	0	0	0	0	0	58	0	0	0	0	0
1043	2-Nov-21	2:15:00	1	0	1	0	CT	0	0	0	2	0	0	0	0	0	2	0	0	0	0	0	0	0	0	0	0	0	0	0	0	0	0	0	0	0	0	0	0	0	0
1044	2-Nov-21	2:20:00	1	0	1	0	CT	0	0	0	4	0	0	0	0	0	0	0	0	0	0	0	0	0	0	28	0	0	17	0	0	0	0	0	8	0	1	0	0	0	0
1045	2-Nov-21	2:25:00	1	0	1	0	CT	0	0	0	51	0	0	0	0	0	0	0	0	0	0	0	0	0	0	27	0	0	47	0	0	0	0	0	0	7	0	0	0	0	0
1046	2-Nov-21	2:30:00	1	0	1	0	CT	0	0	0	0	0	0	0	1	0	0	0	0	0	1	0	0	0	0	0	0	0	86	0	0	0	0	0	0	2	0	0	0	0	0
1047	2-Nov-21	2:35:00	1	0	1	0	CT	0	0	0	0	0	0	0	0	0	0	0	0	0	0	0	0	0	0	0	0	0	0	0	0	0	0	0	0	0	0	0	0	0	0
1048	2-Nov-21	2:40:00	1	0	1	0	CT	0	0	0	0	0	0	0	0	7	0	0	0	0	0	0	0	0	0	0	0	0	0	0	0	20	0	2	0	0	0	0	0	0	0
1049	2-Nov-21	2:45:00	1	0	1	0	CT	0	0	0	0	0	0	0	0	0	0	0	0	0	0	0	0	0	0	0	0	0	0	0	0	0	0	0	0	0	0	0	0	0	0
1050	2-Nov-21	2:50:00	1	0	1	0	CT	0	0	0	0	44	0	0	1	0	0	0	0	0	0	0	25	0	0	0	0	0	0	0	3	0	0	0	0	0	6	0	0	0	0
1051	2-Nov-21	2:55:00	1	0	1	0	CT	0	0	0	0	15	0	0	4	0	1	0	0	0	0	0	71	0	0	0	0	0	0	0	2	0	0	0	0	0	0	0	0	0	0
1052	2-Nov-21	3:00:00	1	0	1	0	CT	0	0	0	0	0	0	0	0	0	63	0	0	0	0	0	62	0	0	39	0	0	0	2	0	0	0	0	0	3	0	0	0	77	0
1053	2-Nov-21	3:05:00	1	0	1	0	CT	0	0	0	70	0	0	0	0	0	63	0	0	0	0	0	41	0	0	0	0	0	0	0	0	0	0	84	0	1	0	0	0	61	0
1054	2-Nov-21	3:10:00	1	0	1	0	CT	0	0	0	58	0	0	0	0	0	63	0	0	0	0	0	0	0	0	0	0	0	0	0	0	0	0	57	0	0	0	0	0	0	0
1055	2-Nov-21	3:15:00	1	0	1	0	CT	0	0	0	57	1	0	0	0	0	38	0	0	0	0	0	0	0	0	0	0	0	0	0	0	0	0	66	0	0	0	0	0	0	0
1056	2-Nov-21	3:20:00	1	0	1	0	CT	0	0	0	25	0	0	0	0	0	63	0	0	0	5	0	0	0	0	0	0	0	0	0	0	0	0	63	0	0	0	0	0	0	0
1057	2-Nov-21	3:25:00	1	0	1	0	CT	0	0	0	0	0	0	0	0	0	63	0	0	0	0	0	11	0	0	0	0	0	0	0	0	0	0	11	2	1	0	0	0	0	0
1058	2-Nov-21	3:30:00	1	0	1	0	CT	0	0	0	0	0	0	0	0	0	0	0	0	0	0	0	0	0	0	0	0	0	0	0	0	0	0	0	0	3	0	0	0	3	0
1059	2-Nov-21	3:35:00	1	0	1	0	CT	0	0	0	0	3	0	0	0	0	0	0	0	0	0	0	0	0	0	0	0	0	0	0	2	0	1	0	0	1	3	0	0	35	0
1060	2-Nov-21	3:40:00	1	0	1	0	CT	0	0	0	0	0	0	0	0	0	42	0	0	0	0	0	0	0	0	0	0	0	0	4	0	0	0	0	0	0	0	0	0	0	0
1061	2-Nov-21	3:45:00	1	0	1	0	CT	0	0	0	0	0	0	0	2	0	26	0	0	0	0	0	0	0	0	0	0	0	0	10	0	0	0	0	0	0	0	0	0	0	0
1062	2-Nov-21	3:50:00	1	0	1	0	CT	0	0	0	2	0	0	0	0	0	0	0	0	0	0	0	0	0	0	0	0	0	0	0	0	0	0	0	0	0	0	0	0	0	0
1063	2-Nov-21	3:55:00	1	0	1	0	CT	0	0	0	0	0	0	0	1	0	1	0	0	0	0	0	0	0	0	0	0	9	0	0	0	0	0	0	1	0	0	0	0	0	0
1064	2-Nov-21	4:00:00	1	0	1	0	CT	0	0	0	0	0	0	0	0	0	0	0	0	0	0	0	0	0	0	0	0	5	0	0	0	1	0	0	0	0	0	0	0	1	0
1065	2-Nov-21	4:05:00	1	0	1	0	CT	0	0	0	0	0	0	0	0	0	0	0	0	0	0	0	0	0	0	0	0	0	0	0	0	44	0	0	0	0	0	0	0	0	0
1066	2-Nov-21	4:10:00	1	0	1	0	CT	0	0	0	0	0	0	0	0	0	0	0	0	0	0	0	0	0	0	0	0	0	0	0	0	0	0	0	0	0	0	0	0	0	0
1067	2-Nov-21	4:15:00	1	0	1	0	CT	0	0	0	0	0	0	0	0	0	0	0	0	0	0	0	0	0	0	0	0	0	0	0	0	0	11	0	0	0	0	0	0	0	0
1068	2-Nov-21	4:20:00	1	0	1	0	CT	0	0	0	0	0	0	0	0	0	0	0	0	0	0	0	0	0	0	0	0	0	0	0	0	0	0	0	0	0	0	0	0	0	0
1069	2-Nov-21	4:25:00	1	0	1	0	CT	0	0	0	0	0	0	0	4	0	0	0	0	0	0	0	0	0	0	0	0	0	0	0	0	0	0	0	15	0	0	2	0	0	0
1070	2-Nov-21	4:30:00	1	0	1	0	CT	0	0	36	0	2	0	0	0	0	0	0	0	1	0	0	0	0	0	0	0	32	0	0	0	0	0	0	15	0	0	0	0	0	0
1071	2-Nov-21	4:35:00	1	0	1	0	CT	0	0	28	8	0	0	0	0	0	0	0	0	0	0	0	0	0	0	0	0	6	0	0	0	0	0	0	3	0	2	0	0	13	0
1072	2-Nov-21	4:40:00	1	0	1	0	CT	0	0	0	0	0	0	0	4	0	0	0	0	1	0	0	0	0	0	0	0	0	0	1	0	0	0	0	0	0	0	0	0	16	0
1073	2-Nov-21	4:45:00	1	0	1	0	CT	0	0	0	0	2	0	0	0	0	0	0	0	0	0	0	0	0	0	44	0	0	0	0	1	0	0	0	0	0	0	0	0	93	0
1074	2-Nov-21	4:50:00	1	0	1	0	CT	0	0	0	0	6	0	0	0	0	0	0	0	3	0	0	11	0	0	70	0	0	0	0	2	0	0	0	0	0	0	0	0	138	0
1075	2-Nov-21	4:55:00	1	0	1	0	CT	0	0	0	0	0	0	0	0	0	0	0	0	1	0	0	0	0	0	1	0	0	0	0	0	0	0	0	0	0	0	0	0	109	0
1076	2-Nov-21	5:00:00	1	0	1	0	CT	0	0	0	0	15	0	0	0	3	0	0	0	17	0	0	0	0	0	0	0	0	0	0	0	0	0	0	0	0	0	0	0	55	0
1077	2-Nov-21	5:05:00	1	0	1	0	CT	0	0	0	0	0	0	0	0	0	0	0	0	18	1	0	0	0	0	1	0	0	0	0	0	0	0	0	0	0	0	36	0	0	0
1078	2-Nov-21	5:10:00	1	0	1	0	CT	0	0	0	0	0	0	0	0	0	0	0	0	0	3	0	0	0	0	0	0	0	0	0	0	0	0	0	0	0	0	0	0	0	0
1079	2-Nov-21	5:15:00	1	0	1	0	CT	0	0	0	1	0	0	0	0	0	0	0	0	0	0	0	0	0	0	0	0	0	0	0	1	0	0	0	0	0	0	0	0	0	0
1080	2-Nov-21	5:20:00	1	0	1	0	CT	0	0	0	0	5	0	0	0	0	15	0	0	0	0	0	0	0	0	0	0	0	0	0	35	0	0	0	0	0	0	0	0	0	0
1081	2-Nov-21	5:25:00	1	0	1	0	CT	0	0	0	0	0	0	0	0	0	0	0	0	1	0	0	0	0	0	0	0	12	0	0	23	0	0	0	0	78	0	0	0	0	0
1082	2-Nov-21	5:30:00	1	0	1	0	CT	0	0	0	0	0	0	0	0	0	0	0	0	0	0	0	0	0	0	0	0	0	0	0	0	0	0	0	0	79	15	0	0	0	0
1083	2-Nov-21	5:35:00	1	0	1	0	CT	0	0	0	46	0	0	0	0	0	0	0	0	0	0	0	0	0	0	0	0	0	0	0	0	0	0	0	0	57	67	0	0	0	0
1084	2-Nov-21	5:40:00	1	0	1	0	CT	0	0	0	78	0	0	0	0	0	0	0	0	0	0	0	0	0	0	0	0	0	0	0	0	0	0	0	0	4	83	0	0	0	0
1085	2-Nov-21	5:45:00	1	0	1	0	CT	0	0	0	54	0	0	0	0	0	0	0	0	0	0	0	0	0	0	0	30	0	0	0	0	0	0	0	0	0	0	2	0	0	0
1086	2-Nov-21	5:50:00	1	0	1	0	CT	0	0	0	10	0	0	0	0	0	0	0	0	1	0	0	0	0	0	0	58	0	0	0	0	0	0	0	0	0	0	0	0	0	0
1087	2-Nov-21	5:55:00	1	0	1	0	CT	0	0	0	0	0	0	15	0	0	0	0	0	4	0	0	0	0	0	0	3	0	0	0	0	12	0	0	0	0	0	0	0	0	0
1088	2-Nov-21	6:00:00	1	0	1	0	CT	0	0	0	0	0	0	0	0	0	0	0	0	0	17	0	51	0	1	0	0	0	0	0	0	1	0	0	0	0	0	0	0	0	0
1089	2-Nov-21	6:05:00	1	0	1	0	CT	0	0	0	0	0	0	0	0	1	0	0	17	0	0	0	0	0	17	0	0	0	0	0	0	0	0	0	22	5	0	0	0	0	0
1090	2-Nov-21	6:10:00	1	0	1	0	CT	0	0	0	0	0	11	0	1	0	0	0	14	0	0	0	1	0	7	0	0	0	0	0	0	0	0	0	22	64	16	2	0	0	0
1091	2-Nov-21	6:15:00	1	0	1	0	CT	0	0	0	0	0	19	0	0	0	0	0	22	0	0	0	0	0	0	0	0	20	0	0	0	0	0	0	0	91	30	8	0	0	0
1092	2-Nov-21	6:20:00	1	0	1	0	CT	0	0	0	0	0	0	0	0	0	0	0	0	0	0	0	0	0	0	0	0	0	0	0	0	0	0	0	0	95	32	1	0	0	0
1093	2-Nov-21	6:25:00	1	0	1	0	CT	0	0	0	0	0	0	0	0	11	0	0	0	0	0	0	0	0	0	0	0	0	0	0	0	0	0	0	0	47	0	0	0	0	0
1094	2-Nov-21	6:30:00	1	0	1	0	CT	0	0	18	0	0	0	0	0	2	0	0	55	0	0	0	0	0	0	0	0	0	8	0	0	0	0	0	0	26	0	1	0	0	0
1095	2-Nov-21	6:35:00	1	0	1	0	CT	0	0	2	0	0	0	0	0	0	0	0	34	0	0	0	14	0	0	0	0	0	0	0	0	0	0	0	0	61	0	0	0	0	0
1096	2-Nov-21	6:40:00	1	0	1	0	CT	0	0	0	0	32	0	0	6	5	0	0	0	38	0	0	3	0	0	6	0	0	0	0	0	0	0	0	0	0	4	0	0	0	0
1097	2-Nov-21	6:45:00	1	0	1	0	CT	0	0	0	0	75	0	0	0	18	0	0	0	79	0	0	0	0	0	8	0	0	0	0	0	0	0	0	0	0	26	1	0	0	0
1098	2-Nov-21	6:50:00	1	0	1	0	CT	0	0	0	0	67	0	0	1	2	0	0	0	92	0	0	1	0	0	0	0	0	0	0	0	0	0	0	0	0	0	1	0	0	0
1099	2-Nov-21	6:55:00	1	0	1	0	CT	0	0	0	0	3	0	42	0	0	0	0	0	94	0	0	0	0	0	0	0	0	0	2	5	0	59	0	0	0	0	0	0	0	0
1100	2-Nov-21	7:00:00	1	0	1	0	CT	0	0	0	0	0	0	64	0	0	0	0	0	99	0	0	0	0	0	0	1	0	0	0	18	0	23	0	0	0	0	0	0	0	0
1101	2-Nov-21	7:05:00	1	0	1	0	CT	0	0	0	0	0	0	86	0	0	0	0	0	75	0	0	0	0	0	1	0	5	0	8	70	0	0	0	0	0	3	40	0	0	0
1102	2-Nov-21	7:10:00	1	0	1	0	CT	0	0	0	0	0	0	20	6	0	0	0	0	74	0	0	0	0	0	0	30	9	0	10	78	0	0	0	0	0	14	4	0	0	0
1103	2-Nov-21	7:15:00	1	0	1	0	CT	0	0	0	0	0	0	0	2	0	0	0	0	89	0	0	11	0	0	2	50	30	0	28	1	0	0	0	67	0	0	0	0	0	0
1104	2-Nov-21	7:20:00	1	0	1	0	CT	0	0	19	0	0	0	20	0	0	0	0	18	64	0	0	0	0	0	0	0	1	0	56	0	0	3	0	59	0	0	0	0	0	0
1105	2-Nov-21	7:25:00	1	0	1	0	CT	0	0	6	0	0	0	0	0	0	0	0	58	0	0	0	0	4	0	0	0	0	0	17	0	0	0	0	30	0	1	0	0	0	0
1106	2-Nov-21	7:30:00	1	0	1	0	CT	0	0	0	48	0	0	0	0	1	0	1	0	0	0	0	0	30	0	0	0	2	0	3	0	0	0	0	0	0	2	0	0	0	0
1107	2-Nov-21	7:35:00	1	0	1	0	CT	0	0	0	31	0	0	1	1	0	0	14	0	0	0	0	0	1	0	0	0	33	0	0	0	0	0	0	0	0	0	17	0	0	0
1108	2-Nov-21	7:40:00	1	0	1	0	CT	0	0	0	0	0	47	0	0	43	0	0	0	0	0	0	0	0	0	0	0	7	40	1	0	0	3	12	0	0	38	16	0	0	0
1109	2-Nov-21	7:45:00	1	0	1	0	CT	0	0	0	0	0	25	0	0	5	0	0	0	0	0	0	0	0	4	0	0	0	0	7	0	0	0	27	0	2	73	0	0	0	0
1110	2-Nov-21	7:50:00	1	0	1	0	CT	0	0	3	0	0	0	0	0	0	6	0	5	0	0	0	22	3	33	0	41	0	0	1	0	0	0	62	0	82	96	0	52	0	0
1111	2-Nov-21	7:55:00	1	0	1	0	CT	0	0	1	0	0	0	51	0	0	0	0	0	0	0	0	92	0	2	1	28	0	0	0	0	0	0	48	0	88	1	0	66	0	0
1112	2-Nov-21	8:00:00	1	0	1	0	CT	0	0	42	0	0	0	45	2	0	0	0	0	0	0	0	77	0	0	50	0	41	0	0	0	0	0	86	0	11	0	0	12	0	0
1113	2-Nov-21	8:05:00	1	0	1	0	CT	0	0	0	0	0	0	73	0	0	0	0	0	0	0	0	65	0	17	0	0	52	0	0	0	0	0	67	49	0	1	0	0	0	60
1114	2-Nov-21	8:10:00	1	0	1	0	CT	0	0	28	0	0	0	0	2	0	0	0	0	0	0	0	0	0	67	29	0	57	3	0	37	5	0	63	18	0	1	0	0	0	0
1115	2-Nov-21	8:15:00	1	0	1	0	CT	0	0	0	0	62	0	0	17	0	0	0	0	0	0	0	0	0	0	24	0	60	29	0	14	43	45	0	0	0	53	0	0	0	44
1116	2-Nov-21	8:20:00	1	0	1	0	CT	0	1	34	31	80	82	66	54	94	18	35	62	93	37	30	24	68	27	79	75	63	60	61	83	49	97	57	28	83	123	55	80	121	108
1117	2-Nov-21	8:25:00	1	0	1	0	CT	0	1	85	37	74	95	94	9	114	59	16	63	102	57	45	32	105	68	107	42	62	99	88	70	108	109	55	46	74	82	34	105	143	92
1118	2-Nov-21	8:30:00	1	0	1	0	CT	0	1	77	38	61	88	70	1	70	58	7	65	124	1	6	4	76	36	100	53	61	62	88	80	98	71	44	88	96	118	11	83	116	92
1119	2-Nov-21	8:35:00	1	0	1	0	CT	0	1	63	35	49	81	113	7	47	52	15	41	116	9	42	64	57	40	88	40	53	65	53	70	70	110	55	65	69	97	44	77	126	109
1120	2-Nov-21	8:40:00	1	0	1	0	CT	0	1	67	59	1	72	80	9	106	36	30	21	105	8	27	38	91	40	108	54	57	64	68	70	68	87	54	60	87	116	65	86	97	94
1121	2-Nov-21	8:45:00	1	0	1	0	CT	0	1	56	57	58	80	61	13	15	61	65	50	112	15	17	121	93	27	75	53	77	21	19	52	81	103	52	47	105	96	47	94	127	67
1122	2-Nov-21	8:50:00	1	0	1	0	CT	0	1	60	69	57	59	72	19	26	48	70	64	82	0	22	91	85	4	59	68	52	23	67	44	6	93	68	39	87	95	51	49	135	84
1123	2-Nov-21	8:55:00	1	0	1	0	CT	0	1	61	40	30	71	19	2	0	42	45	50	86	11	2	84	70	26	2	92	62	33	54	81	25	68	38	55	79	96	46	79	124	83
1124	2-Nov-21	9:00:00	1	0	1	0	CT	0	1	18	88	0	82	68	0	0	42	20	58	93	31	1	57	58	11	0	29	17	83	39	30	72	63	66	48	79	85	33	54	101	58
1125	2-Nov-21	9:05:00	1	0	1	0	CT	0	1	0	51	0	45	39	6	0	41	0	3	80	19	22	74	75	0	0	40	77	46	14	51	28	54	42	32	89	99	0	86	139	95
1126	2-Nov-21	9:10:00	1	0	1	0	CT	0	1	3	34	12	41	0	9	0	63	0	0	86	2	20	0	66	0	41	25	24	35	1	29	70	74	44	46	91	49	20	54	102	83
1127	2-Nov-21	9:15:00	1	0	1	0	CT	0	1	1	72	67	0	0	0	25	44	0	8	68	10	0	0	15	2	97	27	0	0	5	49	56	109	71	31	51	29	69	40	108	95
1128	2-Nov-21	9:20:00	1	0	1	0	CT	0	1	0	45	45	58	16	1	40	28	0	59	84	10	0	0	44	0	95	36	45	4	0	41	57	63	43	48	90	29	36	53	113	81
1129	2-Nov-21	9:25:00	1	0	1	0	CT	0	1	0	1	0	81	0	18	1	0	14	12	87	2	0	0	54	1	70	40	62	7	6	0	15	69	43	27	35	21	41	65	82	38
1130	2-Nov-21	9:30:00	1	0	1	0	CT	0	1	0	0	0	48	0	0	1	0	0	16	82	15	43	0	64	3	23	5	40	7	1	1	0	38	55	3	8	11	4	34	112	46
1131	2-Nov-21	9:35:00	1	0	1	0	CT	0	1	0	5	0	0	0	0	0	39	0	0	82	7	17	0	56	2	0	20	38	0	0	2	0	28	21	1	14	27	0	33	82	72
1132	2-Nov-21	9:40:00	1	0	1	0	CT	0	1	0	8	0	0	0	23	7	18	0	0	60	53	21	0	39	2	0	0	0	0	5	69	10	0	48	0	6	5	0	19	87	57
1133	2-Nov-21	9:45:00	1	0	1	0	CT	0	1	80	0	0	2	0	2	32	0	0	10	84	5	10	69	48	0	43	0	0	0	0	46	89	44	46	0	7	13	0	4	102	1
1134	2-Nov-21	9:50:00	1	0	1	0	CT	0	1	83	0	0	20	0	7	12	13	0	6	27	13	2	60	70	1	26	0	0	3	0	69	45	5	0	2	18	30	3	11	97	0
1135	2-Nov-21	9:55:00	1	0	1	0	CT	0	1	71	0	0	1	0	0	0	2	0	5	0	50	9	38	51	0	80	10	0	15	12	35	3	2	0	4	40	24	0	45	35	71
1136	2-Nov-21	10:00:00	1	0	1	0	CT	0	1	34	0	0	6	0	0	4	13	0	5	0	18	33	57	58	9	65	4	0	0	10	25	1	0	0	3	55	27	0	4	29	50
1137	2-Nov-21	10:05:00	1	0	1	0	CT	0	1	5	0	0	0	0	0	23	0	0	0	14	24	27	41	52	29	0	5	0	0	1	0	0	66	0	0	0	24	0	4	58	3
1138	2-Nov-21	10:10:00	1	0	1	0	CT	0	1	36	13	0	2	51	0	25	2	5	4	41	11	23	74	56	27	38	7	6	23	2	65	31	48	59	2	86	19	7	52	49	33
1139	2-Nov-21	10:15:00	1	0	1	0	CT	0	1	101	57	96	2	108	0	17	20	2	10	70	16	0	42	68	13	60	8	5	67	37	58	87	2	85	67	87	32	80	34	101	60
1140	2-Nov-21	10:20:00	1	0	1	0	CT	0	1	72	65	106	6	104	21	6	0	1	6	93	2	0	70	25	13	46	2	17	53	5	12	43	13	57	30	82	16	75	28	125	56
1141	2-Nov-21	10:25:00	1	0	1	0	CT	0	1	0	48	62	10	4	13	1	0	0	70	82	6	4	34	0	10	0	0	13	36	2	17	0	19	63	13	20	32	20	2	86	43
1142	2-Nov-21	10:30:00	1	0	1	0	CT	0	1	0	21	34	1	0	22	12	0	0	59	2	3	12	0	0	13	0	0	0	0	13	10	0	21	35	3	4	5	16	0	54	20
1143	2-Nov-21	10:35:00	1	0	1	0	CT	0	1	0	6	0	7	0	7	15	0	8	25	0	16	0	15	0	0	0	0	1	4	0	5	0	54	0	0	2	8	40	1	61	0
1144	2-Nov-21	10:40:00	1	0	1	0	CT	0	1	0	2	0	0	0	0	10	0	59	27	28	1	2	35	0	0	0	0	0	7	10	0	0	41	36	0	0	14	8	6	51	0
1145	2-Nov-21	10:45:00	1	0	1	0	CT	0	1	3	9	0	0	0	0	24	0	43	0	2	6	1	0	3	5	18	17	4	1	4	2	49	0	0	0	0	30	0	37	53	0
1146	2-Nov-21	10:50:00	1	0	1	0	CT	0	1	24	14	0	0	0	7	14	0	37	0	2	19	0	3	10	1	0	45	1	0	12	0	22	0	0	0	2	18	0	40	0	0
1147	2-Nov-21	10:55:00	1	0	1	0	CT	0	1	9	19	0	0	0	9	6	0	55	0	1	2	20	33	4	0	0	41	2	4	79	4	2	0	0	0	0	33	1	36	38	78
1148	2-Nov-21	11:00:00	1	0	1	0	CT	0	1	0	9	0	9	35	5	12	0	7	0	0	34	2	51	5	6	41	42	4	0	24	10	0	20	0	0	2	12	0	4	36	60
1149	2-Nov-21	11:05:00	1	0	1	0	CT	0	1	28	16	12	11	31	4	6	0	0	0	7	65	0	30	5	4	81	47	0	0	0	10	9	23	0	0	4	31	2	0	57	25
1150	2-Nov-21	11:10:00	1	0	1	0	CT	0	1	0	7	76	12	22	0	0	9	0	0	76	3	22	59	15	6	28	12	6	4	3	9	7	26	0	0	16	26	26	2	78	0
1151	2-Nov-21	11:15:00	1	0	1	0	CT	0	1	9	11	58	8	30	14	2	34	0	0	90	8	22	43	2	6	3	36	3	3	0	10	9	11	15	19	19	16	33	19	35	0
1152	2-Nov-21	11:20:00	1	0	1	0	CT	0	1	18	2	0	9	0	9	6	43	0	0	71	3	17	39	0	5	1	12	1	5	0	0	0	0	44	5	16	8	56	54	36	0
1153	2-Nov-21	11:25:00	1	0	1	0	CT	0	1	12	0	0	8	56	0	0	39	0	0	6	12	6	0	7	3	0	28	4	2	0	0	0	0	13	16	9	21	6	38	73	4
1154	2-Nov-21	11:30:00	1	0	1	0	CT	0	1	0	0	2	10	0	5	0	1	0	0	0	7	29	0	0	0	0	0	3	11	0	7	4	0	0	9	20	20	13	13	52	0
1155	2-Nov-21	11:35:00	1	0	1	0	CT	0	1	19	0	11	0	16	5	0	0	0	0	0	10	16	2	3	4	8	0	0	4	0	13	3	23	0	11	13	13	9	41	29	20
1156	2-Nov-21	11:40:00	1	0	1	0	CT	0	1	18	14	10	0	0	8	0	0	0	0	6	25	15	2	0	4	1	0	3	7	3	5	6	33	0	6	13	6	4	34	63	34
1157	2-Nov-21	11:45:00	1	0	1	0	CT	0	1	2	18	88	0	0	13	56	12	0	0	7	8	14	35	0	1	1	0	0	6	4	8	1	22	13	9	10	11	7	1	76	5
1158	2-Nov-21	11:50:00	1	0	1	0	CT	0	1	0	8	22	5	0	20	22	0	0	0	10	9	15	84	9	0	2	0	0	1	7	0	7	6	55	0	15	30	2	1	57	0
1159	2-Nov-21	11:55:00	1	0	1	0	CT	0	1	24	25	0	13	37	4	22	0	0	9	12	7	5	54	8	0	10	11	8	1	4	14	9	0	32	1	15	15	4	11	39	1
1160	2-Nov-21	12:00:00	1	0	1	0	CT	0	1	1	0	0	15	3	30	7	0	0	2	14	2	8	42	85	7	11	4	6	8	0	4	9	16	79	4	23	18	31	6	12	0
1161	2-Nov-21	12:05:00	1	0	1	0	CT	0	1	11	9	0	3	28	8	0	0	9	26	7	1	9	41	85	0	13	20	2	11	3	9	4	3	47	18	8	18	4	2	40	0
1162	2-Nov-21	12:10:00	1	0	1	0	CT	0	1	3	10	0	0	0	2	17	0	10	9	2	12	2	0	61	0	10	8	13	17	0	14	5	0	69	47	15	29	2	6	80	0
1163	2-Nov-21	12:15:00	1	0	1	0	CT	0	1	22	4	0	0	20	3	30	0	0	2	16	5	4	0	32	0	9	8	0	7	0	6	8	0	31	25	11	3	29	7	38	2
1164	2-Nov-21	12:20:00	1	0	1	0	CT	0	1	49	0	0	0	45	2	1	0	0	14	87	6	3	15	69	0	4	4	0	8	9	1	13	27	19	0	15	5	55	3	19	23
1165	2-Nov-21	12:25:00	1	0	1	0	CT	0	1	91	10	13	22	22	8	33	0	0	9	68	33	29	42	26	21	11	7	21	4	61	11	12	48	42	11	23	30	75	46	31	10
1166	2-Nov-21	12:30:00	1	0	1	0	CT	0	1	80	50	93	17	81	0	33	14	27	60	65	44	50	39	60	23	10	16	7	60	95	68	12	54	56	21	10	28	45	62	56	12
1167	2-Nov-21	12:35:00	1	0	1	0	CT	0	1	76	19	57	70	86	0	25	11	68	77	25	25	41	67	38	49	8	8	48	48	56	34	8	83	63	21	14	37	21	34	32	14
1168	2-Nov-21	12:40:00	1	0	1	0	CT	0	1	75	58	9	49	44	20	14	1	78	49	11	14	35	57	82	8	18	6	68	10	12	48	8	98	13	18	18	18	66	44	39	16
1169	2-Nov-21	12:45:00	1	0	1	0	CT	0	1	62	37	3	2	1	8	45	26	4	38	8	20	20	5	83	32	5	15	54	14	4	43	19	94	0	22	14	3	31	29	36	11
1170	2-Nov-21	12:50:00	1	0	1	0	CT	0	1	85	43	23	64	78	0	70	15	0	41	23	7	11	65	7	31	3	39	41	65	77	44	76	49	66	61	106	100	55	33	40	95
1171	2-Nov-21	12:55:00	1	0	1	0	CT	0	1	3	13	0	68	121	0	14	46	0	0	6	12	21	9	0	46	0	61	47	12	72	30	73	4	12	69	56	11	0	1	33	72
1172	2-Nov-21	13:00:00	1	0	1	0	CT	0	1	0	0	0	33	2	0	0	29	0	0	4	34	47	0	0	35	7	8	30	0	0	17	55	29	0	59	8	3	0	42	33	40
1173	2-Nov-21	13:05:00	1	0	1	0	CT	0	1	0	0	0	0	0	0	8	0	0	0	11	15	11	0	0	44	12	0	14	5	5	32	53	3	0	39	4	16	3	30	20	5
1174	2-Nov-21	13:10:00	1	0	1	0	CT	0	1	0	4	0	3	0	0	17	0	0	0	15	3	12	0	0	9	0	0	3	10	2	0	43	31	0	2	0	5	17	9	7	1
1175	2-Nov-21	13:15:00	1	0	1	0	CT	0	1	7	5	0	18	0	0	0	0	0	0	0	13	20	0	0	2	0	0	6	0	5	0	30	13	26	0	0	12	5	11	7	2
1176	2-Nov-21	13:20:00	1	0	1	0	CT	0	1	0	3	0	2	0	6	0	0	20	0	9	2	8	0	0	5	11	0	5	12	0	0	2	0	40	0	17	14	45	8	82	0
1177	2-Nov-21	13:25:00	1	0	1	0	CT	0	1	5	2	0	10	0	5	1	0	5	0	13	1	6	0	0	9	2	0	0	4	12	0	6	0	0	0	9	5	0	0	45	3
1178	2-Nov-21	13:30:00	1	0	1	0	CT	0	1	0	4	0	20	0	11	7	0	0	9	28	28	6	0	0	2	12	0	0	4	5	0	5	21	0	0	7	6	0	1	38	9
1179	2-Nov-21	13:35:00	1	0	1	0	CT	0	1	0	4	2	14	0	0	25	0	0	2	9	5	8	48	0	2	2	15	6	1	10	2	5	4	0	1	8	20	0	6	11	11
1180	2-Nov-21	13:40:00	1	0	1	0	CT	0	1	0	4	12	1	2	4	4	0	0	4	9	12	7	6	0	9	11	13	2	8	34	6	6	31	0	0	5	10	35	9	68	5
1181	2-Nov-21	13:45:00	1	0	1	0	CT	0	1	29	7	10	0	0	2	21	0	0	4	2	23	14	57	24	6	15	6	3	2	0	10	4	38	0	0	14	14	34	35	26	6
1182	2-Nov-21	13:50:00	1	0	1	0	CT	0	1	77	3	4	0	55	11	11	70	0	1	13	7	38	77	7	10	31	15	2	1	8	5	4	18	0	0	15	28	14	39	66	15
1183	2-Nov-21	13:55:00	1	0	1	0	CT	0	1	74	47	8	1	31	1	0	36	2	1	12	18	22	51	1	3	18	3	5	1	3	1	4	3	40	0	3	12	11	23	50	3
1184	2-Nov-21	14:00:00	1	0	1	0	CT	0	1	57	5	6	2	9	14	2	13	15	8	18	26	17	0	0	6	57	6	6	39	0	1	2	42	77	0	11	9	31	1	25	1
1185	2-Nov-21	14:05:00	1	0	1	0	CT	0	1	75	0	6	13	20	0	38	6	0	1	11	0	15	7	1	0	69	7	3	77	0	0	5	5	48	0	14	4	9	0	88	9
1186	2-Nov-21	14:10:00	1	0	1	0	CT	0	1	66	0	15	1	15	0	13	0	0	2	13	7	0	61	5	0	100	6	15	32	0	0	2	14	21	0	5	57	0	1	54	9
1187	2-Nov-21	14:15:00	1	0	1	0	CT	0	1	57	2	61	0	35	0	25	1	0	0	9	1	5	15	0	4	71	8	9	6	0	0	0	8	25	14	2	23	5	22	43	9
1188	2-Nov-21	14:20:00	1	0	1	0	CT	0	1	4	18	15	0	57	0	6	0	6	6	7	10	9	27	2	2	81	14	4	6	4	0	5	34	56	16	1	11	8	37	53	1
1189	2-Nov-21	14:25:00	1	0	1	0	CT	0	1	16	7	4	0	85	0	17	0	1	5	10	1	19	3	0	6	16	15	1	3	6	0	7	0	17	8	5	15	0	20	41	17
1190	2-Nov-21	14:30:00	1	0	1	0	CT	0	1	11	9	0	0	87	0	10	0	15	1	8	1	6	37	0	1	3	11	0	7	5	9	3	0	23	7	9	6	9	30	23	2
1191	2-Nov-21	14:35:00	1	0	1	0	CT	0	1	26	1	4	17	4	0	11	72	21	3	6	1	17	20	2	5	0	2	15	4	6	10	3	0	30	16	16	1	12	35	54	6
1192	2-Nov-21	14:40:00	1	0	1	0	CT	0	1	20	3	9	15	0	7	13	63	38	1	0	2	13	33	2	4	2	6	89	4	7	6	6	0	47	2	17	12	11	32	24	4
1193	2-Nov-21	14:45:00	1	0	1	0	CT	0	1	1	5	5	0	3	13	14	63	1	0	8	0	0	63	17	9	1	0	46	4	19	2	7	0	70	13	7	25	1	4	38	6
1194	2-Nov-21	14:50:00	1	0	1	0	CT	0	1	3	0	2	0	0	1	3	22	0	0	19	7	0	74	0	8	0	0	27	7	19	0	3	27	62	7	1	14	1	27	66	10
1195	2-Nov-21	14:55:00	1	0	1	0	CT	0	1	1	3	14	9	0	8	7	26	0	0	5	5	1	94	14	23	15	13	61	6	9	8	9	27	54	10	5	11	16	44	19	13
1196	2-Nov-21	15:00:00	1	0	1	0	CT	0	1	8	3	1	10	4	9	7	14	0	2	8	16	1	29	5	26	4	6	37	3	12	1	12	14	58	0	7	14	23	1	35	17
1197	2-Nov-21	15:05:00	1	0	1	0	CT	0	1	7	23	5	1	0	2	20	1	0	5	22	2	40	2	24	10	13	5	7	0	0	15	5	1	0	1	13	15	6	35	9	4
1198	2-Nov-21	15:10:00	1	0	1	0	CT	0	1	33	9	13	19	0	0	0	35	0	8	12	5	34	2	58	93	13	10	2	4	0	12	2	0	0	6	14	3	19	26	18	17
1199	2-Nov-21	15:15:00	1	0	1	0	CT	0	1	0	0	9	3	0	0	0	56	4	7	11	3	32	21	26	22	0	13	4	5	6	1	4	13	0	10	12	8	29	4	47	12
1200	2-Nov-21	15:20:00	1	0	1	0	CT	0	1	28	0	3	22	0	3	1	3	8	4	7	0	19	0	3	5	0	17	7	20	5	4	13	8	0	8	9	19	29	16	9	14
1201	2-Nov-21	15:25:00	1	0	1	0	CT	0	1	72	0	3	1	0	26	11	0	6	0	37	3	44	40	0	0	2	9	2	58	0	0	21	3	21	10	6	2	12	40	4	4
1202	2-Nov-21	15:30:00	1	0	1	0	CT	0	1	66	0	1	7	0	34	17	0	7	10	7	8	18	16	0	30	12	0	8	72	18	14	6	8	71	6	5	17	11	32	19	0
1203	2-Nov-21	15:35:00	1	0	1	0	CT	0	1	57	0	1	4	0	11	25	0	4	0	11	12	14	0	3	79	83	1	1	78	11	2	5	6	63	7	5	14	0	1	5	0
1204	2-Nov-21	15:40:00	1	0	1	0	CT	0	1	5	0	1	2	0	8	13	15	0	0	13	26	31	20	5	43	71	11	0	4	9	5	4	14	19	2	13	24	1	7	0	17
1205	2-Nov-21	15:45:00	1	0	1	0	CT	0	1	2	2	8	0	13	7	0	14	0	0	9	6	4	24	1	21	40	5	1	1	12	0	2	0	48	0	3	10	21	5	30	16
1206	2-Nov-21	15:50:00	1	0	1	0	CT	0	1	2	36	19	0	0	3	1	28	0	6	10	8	10	72	3	0	70	9	46	5	5	0	7	0	56	0	14	14	63	2	49	12
1207	2-Nov-21	15:55:00	1	0	1	0	CT	0	1	3	50	3	0	0	0	0	0	0	0	7	3	23	21	0	0	63	7	0	20	11	0	4	0	34	0	35	14	43	15	42	13
1208	2-Nov-21	16:00:00	1	0	1	0	CT	0	1	14	59	6	0	1	2	0	15	3	3	14	0	21	7	1	0	56	6	16	0	6	1	4	10	12	0	9	9	8	39	38	1
1209	2-Nov-21	16:05:00	1	0	1	0	CT	0	1	8	63	15	7	0	10	1	2	9	0	10	6	19	22	1	0	0	11	63	4	3	5	3	5	6	0	4	22	0	9	31	0
1210	2-Nov-21	16:10:00	1	0	1	0	CT	0	1	0	37	1	22	55	7	24	0	46	1	7	6	6	34	6	0	0	9	65	7	14	11	12	17	11	0	19	0	6	29	31	13
1211	2-Nov-21	16:15:00	1	0	1	0	CT	0	1	0	40	2	79	67	4	24	0	66	3	2	15	0	20	9	0	0	3	70	1	3	12	35	18	6	0	18	0	0	33	1	17
1212	2-Nov-21	16:20:00	1	0	1	0	CT	0	1	1	15	13	50	46	0	0	0	41	0	9	14	18	79	0	26	0	19	21	28	0	6	5	12	41	1	15	7	15	3	20	17
1213	2-Nov-21	16:25:00	1	0	1	0	CT	0	1	5	8	4	17	107	1	9	0	1	3	14	5	19	57	3	59	0	6	3	19	15	52	7	12	55	20	11	25	9	4	65	7
1214	2-Nov-21	16:30:00	1	0	1	0	CT	0	1	0	7	8	0	22	2	7	0	0	13	2	17	29	36	27	26	0	0	21	0	13	52	2	18	25	17	6	17	13	8	22	3
1215	2-Nov-21	16:35:00	1	0	1	0	CT	0	1	0	9	4	0	0	0	7	0	0	8	6	2	25	32	1	4	0	0	20	2	6	58	0	9	17	9	3	5	2	1	20	4
1216	2-Nov-21	16:40:00	1	0	1	0	CT	0	1	0	7	3	2	2	0	11	0	0	8	13	0	17	22	1	9	0	2	6	0	1	57	10	6	24	4	0	24	0	10	7	8
1217	2-Nov-21	16:45:00	1	0	1	0	CT	0	1	0	7	1	0	2	0	0	0	12	1	12	0	23	0	0	25	0	11	0	2	5	70	6	2	48	0	16	12	0	8	23	2
1218	2-Nov-21	16:50:00	1	0	1	0	CT	0	1	0	4	1	0	0	0	10	0	3	0	8	0	2	2	0	52	0	30	2	0	0	20	4	4	32	6	10	16	5	5	39	1
1219	2-Nov-21	16:55:00	1	0	1	0	CT	0	1	0	0	3	0	0	0	14	0	0	7	66	21	9	44	51	31	3	0	30	0	9	37	6	12	9	10	10	9	3	1	23	21
1220	2-Nov-21	17:00:00	1	0	1	0	CT	0	1	16	0	0	1	0	0	7	6	0	10	24	32	10	3	31	0	0	0	1	0	7	40	5	2	1	0	12	20	1	1	25	3
1221	2-Nov-21	17:05:00	1	0	1	0	CT	0	1	0	0	7	47	0	0	21	1	49	3	79	77	24	1	24	0	9	0	0	0	6	0	10	0	13	0	1	8	0	10	0	0
1222	2-Nov-21	17:10:00	1	0	1	0	CT	0	1	0	0	6	88	3	0	0	15	58	5	76	16	20	30	59	2	73	0	45	0	6	0	3	0	75	0	7	5	1	2	58	0
1223	2-Nov-21	17:15:00	1	0	1	0	CT	0	1	0	0	0	68	63	0	19	12	22	3	45	17	3	44	49	0	68	0	22	0	4	0	0	0	71	11	0	37	38	48	22	0
1224	2-Nov-21	17:20:00	1	0	1	0	CT	0	1	0	0	0	42	59	2	11	10	0	33	95	55	26	20	59	0	56	0	42	0	3	0	0	0	74	24	0	79	6	52	21	0
1225	2-Nov-21	17:25:00	1	0	1	0	CT	0	1	0	0	0	3	57	0	3	12	0	0	68	34	1	2	8	0	57	0	75	0	0	0	0	0	57	28	0	70	1	9	3	11
1226	2-Nov-21	17:30:00	1	0	1	0	CT	0	1	0	0	0	0	0	1	36	8	0	4	71	29	7	52	2	0	45	8	71	16	0	0	1	0	0	23	0	54	4	25	33	2
1227	2-Nov-21	17:35:00	1	0	1	0	CT	0	1	63	0	0	3	0	7	41	0	0	1	5	5	8	11	0	63	0	15	55	20	15	0	2	0	0	5	0	6	2	43	0	76
1228	2-Nov-21	17:40:00	1	0	1	0	CT	0	1	7	0	0	0	2	18	82	0	0	47	0	0	4	22	12	63	10	2	0	66	10	0	56	0	1	0	0	13	48	78	46	50
1229	2-Nov-21	17:45:00	1	0	1	0	CT	0	1	0	0	0	0	0	0	22	0	13	74	0	3	20	18	6	45	69	0	2	56	65	0	43	0	0	0	32	23	75	20	26	3
1230	2-Nov-21	17:50:00	1	0	1	0	CT	0	1	0	18	0	0	0	0	65	0	39	81	0	87	2	17	0	7	46	0	33	43	82	3	15	0	0	8	16	33	7	14	29	1
1231	2-Nov-21	17:55:00	1	0	1	0	CT	0	1	0	46	0	0	16	0	71	76	45	0	0	38	9	2	0	33	25	0	61	8	46	16	95	0	0	6	27	13	0	33	24	2
1232	2-Nov-21	18:00:00	1	0	1	0	CT	0	1	0	33	0	0	0	0	6	26	10	0	0	0	10	0	0	18	4	0	60	18	60	70	17	0	0	0	21	3	2	37	13	64
1233	2-Nov-21	18:05:00	1	0	1	0	CT	0	1	0	0	0	16	0	0	0	10	1	0	0	0	19	0	0	31	35	0	63	31	9	33	6	0	11	0	12	0	26	13	1	61
1234	2-Nov-21	18:10:00	1	0	1	0	CT	0	1	0	0	0	101	0	0	0	1	51	0	0	39	13	0	0	31	65	0	3	26	17	5	5	37	63	0	2	0	55	2	0	29
1235	2-Nov-21	18:15:00	1	0	1	0	CT	0	1	39	0	0	56	2	0	0	0	20	0	0	68	6	0	0	38	28	0	0	26	15	0	0	19	54	0	0	0	32	0	23	0
1236	2-Nov-21	18:20:00	1	0	1	0	CT	0	1	76	26	0	53	39	0	0	17	0	0	0	30	0	0	0	7	7	0	59	0	0	0	0	16	66	0	25	30	0	3	35	0
1237	2-Nov-21	18:25:00	1	0	1	0	CT	0	1	10	37	0	26	2	0	29	4	0	0	22	0	0	0	0	15	0	0	35	1	35	0	63	0	41	0	18	94	0	20	74	0
1238	2-Nov-21	18:30:00	1	0	1	0	CT	0	1	0	27	0	0	0	23	85	0	0	16	101	1	0	0	0	77	2	0	50	0	70	0	95	0	20	0	8	69	0	5	85	4
1239	2-Nov-21	18:35:00	1	0	1	0	CT	0	1	92	9	0	0	7	27	72	0	0	96	114	21	2	0	0	5	29	0	60	16	51	0	79	0	55	0	0	68	0	0	77	63
1240	2-Nov-21	18:40:00	1	0	1	0	CT	0	1	40	0	0	0	17	27	80	9	31	11	97	78	12	6	43	28	79	0	37	43	60	0	37	0	41	0	0	21	9	1	98	54
1241	2-Nov-21	18:45:00	1	0	1	0	CT	0	1	58	0	0	0	32	21	3	23	54	0	78	64	1	36	85	11	32	0	10	0	24	0	61	10	16	0	10	26	2	0	25	4
1242	2-Nov-21	18:50:00	1	0	1	0	CT	0	1	65	0	0	2	1	62	0	26	4	17	17	0	0	61	78	0	0	0	79	0	0	0	4	0	78	0	21	0	34	0	2	0
1243	2-Nov-21	18:55:00	1	0	1	0	CT	0	1	19	0	0	0	0	14	0	25	1	23	0	4	11	70	30	0	2	0	58	0	80	0	31	0	47	0	18	16	37	0	1	6
1244	2-Nov-21	19:00:00	1	0	1	0	CT	0	1	0	38	40	82	0	11	15	63	1	52	52	60	0	46	0	0	76	0	17	41	57	0	66	0	26	0	67	16	8	0	0	55
1245	2-Nov-21	19:05:00	1	0	1	0	CT	0	1	0	21	86	34	0	24	94	33	49	78	115	67	0	56	0	0	38	4	22	28	23	0	14	0	5	0	97	0	56	25	0	19
1246	2-Nov-21	19:10:00	1	0	1	0	CT	0	1	63	33	68	48	0	20	96	34	33	9	77	20	60	20	18	0	36	80	52	66	53	0	14	10	66	23	14	49	37	47	0	0
1247	2-Nov-21	19:15:00	1	0	1	0	CT	0	1	41	35	16	57	0	18	70	36	33	52	11	5	57	0	74	4	52	16	39	53	77	0	74	70	67	9	5	88	1	70	0	8
1248	2-Nov-21	19:20:00	1	0	1	0	CT	0	1	73	13	0	68	0	26	44	53	53	40	0	81	0	18	33	45	24	39	51	19	50	0	29	70	37	41	62	41	0	53	87	41
1249	2-Nov-21	19:25:00	1	0	1	0	CT	0	1	78	28	55	47	0	63	23	9	29	48	72	24	2	32	35	73	44	29	14	18	62	0	18	80	33	72	86	52	63	0	99	70
1250	2-Nov-21	19:30:00	1	0	1	0	CT	0	1	60	30	65	44	15	11	2	54	78	26	50	7	3	37	58	63	66	54	61	96	49	0	64	45	65	74	63	72	58	0	82	35
1251	2-Nov-21	19:35:00	1	0	1	0	CT	0	1	5	1	14	26	81	21	53	0	30	40	98	5	27	30	14	39	41	49	96	48	52	0	42	37	44	29	0	18	49	3	60	56
1252	2-Nov-21	19:40:00	1	0	1	0	CT	0	1	0	60	58	101	91	27	75	33	4	9	63	52	10	24	77	15	33	6	34	61	38	1	27	68	71	76	14	21	59	0	36	36
1253	2-Nov-21	19:45:00	1	0	1	0	CT	0	1	64	16	44	37	86	28	51	65	55	81	35	54	45	14	60	42	17	9	48	7	10	36	95	65	76	84	86	68	61	49	117	11
1254	2-Nov-21	19:50:00	1	0	1	0	CT	0	1	73	53	28	72	47	17	5	49	52	29	81	65	113	18	38	65	58	47	23	42	48	27	67	25	75	0	80	63	23	62	58	77
1255	2-Nov-21	19:55:00	1	0	1	0	CT	0	1	69	20	43	40	46	33	2	30	28	40	52	5	42	30	105	1	48	14	56	31	40	0	36	0	15	35	20	44	44	79	73	12
1256	2-Nov-21	20:00:00	1	0	1	0	CT	0	1	75	29	36	83	41	38	114	0	57	8	84	0	78	22	45	23	34	26	64	55	43	0	55	65	5	75	0	30	65	51	70	81
1257	2-Nov-21	20:05:00	1	0	1	0	CT	0	1	59	49	46	119	31	22	74	4	24	26	50	52	48	39	44	21	36	11	63	78	58	32	43	73	58	28	55	0	72	60	66	46
1258	2-Nov-21	20:10:00	1	0	1	0	CT	0	1	63	61	28	63	88	24	12	8	50	29	61	70	79	31	36	63	43	18	16	84	87	42	66	52	72	35	24	82	35	13	86	49
1259	2-Nov-21	20:15:00	1	0	1	0	CT	0	1	55	43	25	56	21	38	75	19	32	24	68	43	75	48	83	68	55	46	42	54	60	11	39	47	43	36	11	74	27	0	6	56
1260	2-Nov-21	20:20:00	1	0	1	0	CT	0	1	119	85	93	134	85	81	134	30	59	93	137	92	110	113	131	44	132	102	89	60	54	27	85	99	69	95	122	104	75	102	175	99
1261	2-Nov-21	20:25:00	1	0	1	0	CT	0	0	144	66	79	137	113	72	133	46	66	72	178	78	130	134	152	63	152	91	82	112	82	66	90	131	87	91	108	111	81	92	185	110
1262	2-Nov-21	20:30:00	1	0	1	0	CT	0	0	151	57	73	101	104	62	143	36	64	67	151	56	116	76	89	41	104	75	75	84	65	52	85	120	100	71	74	101	66	76	158	84
1263	2-Nov-21	20:35:00	1	0	1	0	CT	0	0	134	62	75	93	104	73	135	30	67	67	131	68	128	89	75	10	66	80	80	63	63	43	80	131	66	66	84	81	86	38	139	100
1264	2-Nov-21	20:40:00	1	0	1	0	CT	0	0	144	47	78	85	80	74	134	1	52	57	117	57	127	89	65	5	116	86	62	80	72	45	81	129	102	79	85	97	88	76	160	108
1265	2-Nov-21	20:45:00	1	0	1	0	CT	0	0	147	54	76	77	103	62	132	0	38	60	107	0	127	66	69	63	98	45	55	62	59	63	71	104	61	63	81	76	85	52	142	97
1266	2-Nov-21	20:50:00	1	0	1	0	CT	0	0	135	51	63	68	119	64	124	63	64	61	132	0	114	130	57	21	90	48	66	90	69	48	63	98	55	82	87	86	82	57	145	91
1267	2-Nov-21	20:55:00	1	0	1	0	CT	0	0	135	47	63	90	116	62	156	63	59	55	109	0	125	107	75	0	123	58	66	75	65	55	71	106	29	86	82	92	85	77	139	79
1268	2-Nov-21	21:00:00	1	0	1	0	CT	0	0	145	12	75	86	79	62	187	50	37	54	125	0	128	93	70	45	94	72	92	107	68	37	40	109	54	59	75	64	48	72	155	117
1269	2-Nov-21	21:05:00	1	0	1	0	CT	0	0	145	62	87	73	104	61	187	25	23	55	112	0	114	56	59	35	103	69	63	81	61	43	8	102	39	63	78	68	39	62	123	124
1270	2-Nov-21	21:10:00	1	0	1	0	CT	0	0	118	59	63	74	78	45	148	0	0	63	109	0	113	86	49	0	103	80	44	67	83	25	0	11	25	48	82	81	0	56	131	105
1271	2-Nov-21	21:15:00	1	0	1	0	CT	0	0	108	56	41	61	28	70	135	0	0	57	99	0	101	97	38	5	106	55	0	52	1	43	0	3	63	62	71	88	0	62	138	99
1272	2-Nov-21	21:20:00	1	0	1	0	CT	0	0	21	29	0	80	91	44	124	0	1	45	37	0	105	62	47	0	67	19	0	57	0	33	0	0	2	94	76	74	10	75	120	89
1273	2-Nov-21	21:25:00	1	0	1	0	CT	0	0	27	12	3	76	7	55	166	0	0	11	0	0	98	0	73	0	47	53	0	75	0	15	0	0	0	42	112	56	9	68	23	88
1274	2-Nov-21	21:30:00	1	0	1	0	CT	0	0	0	0	0	18	0	26	138	0	0	0	0	0	50	0	39	0	15	52	0	43	0	0	0	0	0	33	90	71	0	89	0	100
1275	2-Nov-21	21:35:00	1	0	1	0	CT	0	0	0	0	0	0	0	0	154	3	0	3	4	0	0	0	50	0	0	43	0	6	0	0	0	0	0	0	81	43	0	95	0	96
1276	2-Nov-21	21:40:00	1	0	1	0	CT	0	0	11	0	0	49	0	0	108	27	0	4	13	0	0	0	59	0	0	74	0	0	0	0	0	0	0	0	64	74	0	63	0	53
1277	2-Nov-21	21:45:00	1	0	1	0	CT	0	0	0	0	0	1	0	0	131	0	0	0	0	0	0	0	52	0	0	4	0	0	0	0	4	0	0	0	6	43	0	67	0	96
1278	2-Nov-21	21:50:00	1	0	1	0	CT	0	0	0	0	0	0	0	0	106	0	0	0	0	0	0	0	6	0	0	0	0	0	0	0	0	0	0	0	32	16	0	83	0	96
1279	2-Nov-21	21:55:00	1	0	1	0	CT	0	0	0	0	0	0	0	0	134	0	0	0	0	0	0	0	0	0	0	0	0	0	0	0	0	0	0	0	73	0	0	1	0	44
1280	2-Nov-21	22:00:00	1	0	1	0	CT	0	0	4	0	0	0	0	0	133	1	0	0	0	0	0	0	0	0	0	0	0	0	0	0	0	0	0	0	0	0	0	0	0	88
1281	2-Nov-21	22:05:00	1	0	1	0	CT	0	0	0	0	0	0	0	0	99	0	0	0	28	0	0	0	0	0	0	0	0	0	0	1	4	0	0	0	0	0	1	27	0	52
1282	2-Nov-21	22:10:00	1	0	1	0	CT	0	0	0	0	0	0	0	0	74	1	0	0	98	0	0	0	0	0	0	0	0	0	0	0	22	0	0	0	0	0	0	0	0	8
1283	2-Nov-21	22:15:00	1	0	1	0	CT	0	0	0	0	0	0	0	0	67	0	0	0	111	0	0	0	0	0	0	0	0	0	0	0	0	0	0	0	0	0	0	0	0	0
1284	2-Nov-21	22:20:00	1	0	1	0	CT	0	0	0	0	0	2	0	0	0	6	0	18	37	0	0	0	0	1	0	0	0	0	0	0	0	0	0	0	0	0	0	0	0	0
1285	2-Nov-21	22:25:00	1	0	1	0	CT	0	0	0	0	0	0	0	0	0	20	0	0	0	0	0	0	0	0	0	0	0	0	0	0	0	0	0	0	7	0	0	0	0	0
1286	2-Nov-21	22:30:00	1	0	1	0	CT	0	0	0	0	0	0	0	0	0	63	0	0	0	0	0	0	0	0	0	0	0	0	0	0	0	0	0	0	100	0	0	0	0	0
1287	2-Nov-21	22:35:00	1	0	1	0	CT	0	0	0	0	0	0	0	0	0	3	0	0	0	0	0	0	0	1	0	0	0	0	0	0	4	0	0	0	96	0	0	0	0	0
1288	2-Nov-21	22:40:00	1	0	1	0	CT	0	0	0	9	10	0	0	0	0	2	0	0	0	0	0	0	0	0	0	0	0	0	0	0	0	0	0	0	42	0	0	3	0	0
1289	2-Nov-21	22:45:00	1	0	1	0	CT	0	0	0	21	0	0	0	0	0	3	0	0	0	0	0	0	0	0	0	0	0	0	0	0	1	0	0	0	1	0	0	29	0	0
1290	2-Nov-21	22:50:00	1	0	1	0	CT	0	0	0	1	0	0	0	0	0	2	0	0	2	0	0	0	0	0	0	0	0	0	0	0	0	0	0	0	0	30	0	24	0	0
1291	2-Nov-21	22:55:00	1	0	1	0	CT	0	0	0	0	0	0	0	0	0	2	0	0	0	0	0	0	0	0	0	0	0	0	0	0	0	0	0	0	1	1	0	0	0	0
1292	2-Nov-21	23:00:00	1	0	1	0	CT	0	0	0	0	0	5	0	0	0	0	0	0	1	0	0	0	0	0	0	0	0	0	0	0	0	0	0	0	1	0	0	0	0	0
1293	2-Nov-21	23:05:00	1	0	1	0	CT	0	0	0	0	0	44	0	0	0	33	0	0	0	0	0	0	0	0	0	0	0	0	0	0	7	0	0	0	1	0	0	0	0	0
1294	2-Nov-21	23:10:00	1	0	1	0	CT	0	0	0	0	0	9	0	0	0	35	0	8	0	0	0	0	0	0	0	0	0	0	0	0	0	0	0	0	0	0	0	0	0	0
1295	2-Nov-21	23:15:00	1	0	1	0	CT	0	0	0	0	0	0	0	0	0	70	0	0	0	0	0	0	0	0	0	0	0	0	1	0	1	0	0	0	2	0	0	0	0	59
1296	2-Nov-21	23:20:00	1	0	1	0	CT	0	0	0	33	0	0	0	0	1	46	0	0	0	0	0	0	0	0	0	0	0	0	0	0	5	0	0	0	0	0	0	0	0	34
1297	2-Nov-21	23:25:00	1	0	1	0	CT	0	0	0	0	0	0	0	0	63	63	0	0	0	0	0	0	0	0	29	0	0	0	0	1	20	0	0	0	0	0	0	0	0	0
1298	2-Nov-21	23:30:00	1	0	1	0	CT	0	0	0	0	0	0	0	0	0	10	0	0	0	0	0	0	0	0	30	0	0	0	0	0	3	0	0	0	1	0	0	0	0	0
1299	2-Nov-21	23:35:00	1	0	1	0	CT	0	0	13	0	0	0	0	0	0	0	0	0	0	0	0	0	0	0	0	10	0	0	0	0	1	0	0	0	0	0	0	0	0	0
1300	2-Nov-21	23:40:00	1	0	1	0	CT	0	0	20	0	0	0	0	0	0	0	0	3	0	0	0	0	0	0	0	3	0	0	0	0	0	0	0	0	2	0	0	0	0	0
1301	2-Nov-21	23:45:00	1	0	1	0	CT	0	0	0	0	0	0	0	0	0	0	0	3	0	0	0	0	0	0	37	0	0	0	0	0	0	0	0	0	0	0	0	0	0	0
1302	2-Nov-21	23:50:00	1	0	1	0	CT	0	0	0	0	0	0	0	0	0	0	0	1	0	0	0	2	0	2	49	0	0	0	0	0	0	0	0	0	0	0	0	0	0	0
1303	2-Nov-21	23:55:00	1	0	1	0	CT	0	0	1	0	28	0	0	0	0	0	0	35	0	0	0	0	0	3	0	0	0	0	0	0	0	0	0	0	0	0	22	0	0	0
1304	3-Nov-21	0:00:00	1	0	1	0	CT	0	0	0	0	39	0	0	0	0	0	0	0	1	0	0	0	0	0	0	0	0	0	0	0	0	0	0	0	1	0	0	0	0	0
1305	3-Nov-21	0:05:00	1	0	1	0	CT	0	0	0	0	0	0	0	0	0	0	0	0	0	0	0	0	0	0	0	0	0	0	0	0	0	0	0	0	0	0	9	0	0	0
1306	3-Nov-21	0:10:00	1	0	1	0	CT	0	0	0	3	0	0	0	0	3	0	0	0	0	0	0	0	0	0	0	0	0	0	0	34	0	0	0	0	0	0	0	0	0	0
1307	3-Nov-21	0:15:00	1	0	1	0	CT	0	0	0	0	0	0	0	0	0	0	0	0	1	0	0	0	0	0	0	15	0	0	0	0	0	6	0	0	0	0	3	0	0	0
1308	3-Nov-21	0:20:00	1	0	1	0	CT	0	0	0	0	0	0	0	0	0	0	0	0	9	0	0	0	0	0	0	0	0	0	0	0	0	0	0	0	1	0	0	0	9	0
1309	3-Nov-21	0:25:00	1	0	1	0	CT	0	0	0	0	0	0	0	0	0	0	0	0	66	0	0	5	0	6	0	0	0	0	0	0	0	0	0	0	58	0	0	0	31	0
1310	3-Nov-21	0:30:00	1	0	1	0	CT	0	0	0	0	1	0	0	0	0	3	0	0	93	0	0	85	0	4	0	0	0	0	0	0	0	0	0	0	0	0	0	0	0	0
1311	3-Nov-21	0:35:00	1	0	1	0	CT	0	0	0	0	0	0	0	0	0	81	0	0	74	0	0	78	0	0	0	0	0	0	0	0	0	0	9	0	0	0	0	0	0	0
1312	3-Nov-21	0:40:00	1	0	1	0	CT	0	0	0	0	0	12	0	0	0	17	0	0	69	0	0	65	0	0	0	0	0	0	0	15	0	0	76	0	0	0	0	0	0	0
1313	3-Nov-21	0:45:00	1	0	1	0	CT	0	0	0	0	0	4	0	0	0	20	0	0	43	0	0	32	0	0	0	0	0	0	0	0	25	0	72	0	0	0	9	0	0	0
1314	3-Nov-21	0:50:00	1	0	1	0	CT	0	0	0	0	0	0	0	0	0	4	0	0	0	0	0	0	0	0	0	0	0	0	0	0	0	0	63	0	0	0	0	0	0	0
1315	3-Nov-21	0:55:00	1	0	1	0	CT	0	0	41	0	0	0	0	0	0	2	0	11	0	0	0	0	0	0	56	0	0	0	0	0	0	0	63	0	0	0	0	0	0	0
1316	3-Nov-21	1:00:00	1	0	1	0	CT	0	0	2	0	0	0	0	0	0	0	0	0	0	0	0	0	0	0	20	0	0	0	0	0	0	0	63	0	0	0	0	0	0	0
1317	3-Nov-21	1:05:00	1	0	1	0	CT	0	0	0	0	0	0	0	0	46	0	0	0	0	0	0	0	0	0	0	0	0	0	0	0	0	0	14	0	0	0	0	0	0	0
1318	3-Nov-21	1:10:00	1	0	1	0	CT	0	0	0	0	1	0	0	0	0	8	0	5	0	0	0	0	0	0	0	0	0	0	0	0	0	0	31	0	0	0	0	2	0	0
1319	3-Nov-21	1:15:00	1	0	1	0	CT	0	0	0	0	0	18	0	0	0	21	0	7	0	0	0	0	0	0	0	48	0	0	0	0	0	0	15	0	0	1	1	30	0	0
1320	3-Nov-21	1:20:00	1	0	1	0	CT	0	0	0	0	1	0	0	0	0	40	0	0	0	0	0	0	0	0	0	0	0	0	0	0	0	0	0	0	0	0	2	28	0	0
1321	3-Nov-21	1:25:00	1	0	1	0	CT	0	0	0	0	0	0	0	0	0	2	0	0	0	0	0	0	0	0	0	0	0	0	0	2	0	0	0	0	0	0	1	0	0	0
1322	3-Nov-21	1:30:00	1	0	1	0	CT	0	0	48	0	1	0	0	0	0	8	0	0	0	0	0	0	0	0	0	0	0	0	0	0	0	0	0	0	0	0	20	0	0	0
1323	3-Nov-21	1:35:00	1	0	1	0	CT	0	0	70	56	0	0	0	0	0	0	0	0	0	0	0	0	0	0	0	0	0	0	0	0	4	0	0	11	0	0	0	0	0	0
1324	3-Nov-21	1:40:00	1	0	1	0	CT	0	0	10	58	0	0	0	0	0	1	0	0	0	0	0	0	0	0	0	0	6	0	0	0	60	0	0	54	0	0	1	0	0	0
1325	3-Nov-21	1:45:00	1	0	1	0	CT	0	0	0	24	0	0	0	0	0	0	0	0	0	0	0	0	0	0	0	0	0	0	0	0	63	12	0	26	0	0	0	0	10	0
1326	3-Nov-21	1:50:00	1	0	1	0	CT	0	0	0	0	0	0	0	0	0	0	0	0	0	0	0	0	0	0	0	0	0	0	1	0	42	22	0	0	0	0	0	2	0	0
1327	3-Nov-21	1:55:00	1	0	1	0	CT	0	0	0	0	0	0	0	0	0	35	0	0	0	0	0	0	0	0	0	0	0	0	0	1	21	0	0	0	0	0	0	0	0	0
1328	3-Nov-21	2:00:00	1	0	1	0	CT	0	0	1	0	0	0	0	0	0	32	0	0	0	0	0	0	0	0	0	4	0	0	0	0	0	0	0	0	0	0	0	1	7	0
1329	3-Nov-21	2:05:00	1	0	1	0	CT	0	0	0	0	0	0	0	0	0	0	0	0	0	0	0	0	0	1	0	0	0	0	0	1	0	1	0	0	0	0	0	0	6	0
1330	3-Nov-21	2:10:00	1	0	1	0	CT	0	0	0	0	1	0	0	0	0	36	0	0	0	0	0	0	0	63	53	0	0	0	0	0	0	1	0	0	0	0	0	15	0	0
1331	3-Nov-21	2:15:00	1	0	1	0	CT	0	0	0	0	0	0	0	0	0	26	0	39	0	0	0	0	0	63	38	8	0	0	0	28	0	0	0	0	0	0	0	46	1	4
1332	3-Nov-21	2:20:00	1	0	1	0	CT	0	0	1	0	0	0	0	0	0	20	0	7	0	0	0	0	0	63	0	0	0	0	0	4	0	0	0	0	0	0	0	2	0	52
1333	3-Nov-21	2:25:00	1	0	1	0	CT	0	0	0	0	1	0	0	0	0	24	0	0	0	0	0	0	0	63	0	0	0	0	0	0	0	0	0	0	0	0	0	0	0	66
1334	3-Nov-21	2:30:00	1	0	1	0	CT	0	0	0	0	11	0	0	0	0	3	0	0	0	0	0	0	0	0	0	0	31	0	0	0	0	1	10	0	0	0	0	0	0	0
1335	3-Nov-21	2:35:00	1	0	1	0	CT	0	0	0	0	0	0	0	0	0	16	8	0	0	0	0	0	0	0	0	0	4	0	0	0	0	0	0	0	0	0	0	0	2	0
1336	3-Nov-21	2:40:00	1	0	1	0	CT	0	0	0	0	0	0	0	0	0	0	0	0	0	0	0	0	0	0	0	0	0	0	0	0	0	0	0	0	0	0	0	0	0	0
1337	3-Nov-21	2:45:00	1	0	1	0	CT	0	0	0	0	0	0	0	0	0	0	0	0	0	0	0	0	0	0	0	0	0	0	3	0	0	0	0	0	0	0	6	20	0	0
1338	3-Nov-21	2:50:00	1	0	1	0	CT	0	0	0	0	0	3	0	0	0	0	0	0	0	0	0	0	0	0	0	0	0	0	0	0	0	0	0	0	45	0	15	0	0	0
1339	3-Nov-21	2:55:00	1	0	1	0	CT	0	0	0	0	0	16	0	0	0	0	5	0	0	0	0	0	0	2	0	0	0	0	0	0	0	1	0	4	105	0	3	0	1	0
1340	3-Nov-21	3:00:00	1	0	1	0	CT	0	0	0	0	0	0	0	0	0	0	0	0	0	0	0	0	0	2	0	0	0	0	0	0	0	0	0	25	98	0	0	0	0	0
1341	3-Nov-21	3:05:00	1	0	1	0	CT	0	0	0	0	0	0	0	0	0	0	0	0	0	0	0	0	0	7	0	0	0	0	0	0	0	0	0	0	60	0	0	0	0	0
1342	3-Nov-21	3:10:00	1	0	1	0	CT	0	0	0	0	0	0	0	0	0	0	0	0	0	0	0	0	0	0	0	0	0	0	0	20	0	0	0	0	88	0	0	0	0	0
1343	3-Nov-21	3:15:00	1	0	1	0	CT	0	0	0	0	0	0	0	0	0	59	0	0	0	0	0	0	0	0	0	0	4	0	0	0	0	0	0	0	67	0	0	0	0	0
1344	3-Nov-21	3:20:00	1	0	1	0	CT	0	0	44	0	0	0	0	0	0	31	0	0	0	0	0	0	0	0	0	0	8	0	0	0	0	0	0	0	2	0	0	0	0	0
1345	3-Nov-21	3:25:00	1	0	1	0	CT	0	0	0	0	0	0	0	0	0	0	0	0	0	0	0	0	0	0	0	0	0	0	0	0	0	2	12	0	0	0	0	0	0	0
1346	3-Nov-21	3:30:00	1	0	1	0	CT	0	0	0	0	0	0	0	0	0	0	0	0	0	0	0	0	0	0	0	0	17	0	0	0	0	37	1	0	0	0	0	0	0	0
1347	3-Nov-21	3:35:00	1	0	1	0	CT	0	0	0	0	0	0	0	0	0	0	0	0	0	0	0	0	0	0	0	0	16	0	0	0	0	0	0	0	0	0	0	0	0	0
1348	3-Nov-21	3:40:00	1	0	1	0	CT	0	0	0	0	18	0	0	0	0	0	0	0	0	0	0	0	0	0	0	0	1	0	0	25	0	0	0	0	0	0	0	0	0	0
1349	3-Nov-21	3:45:00	1	0	1	0	CT	0	0	0	0	0	0	0	0	0	0	0	1	0	0	0	0	0	0	0	0	0	0	0	37	0	0	0	0	0	0	38	0	0	0
1350	3-Nov-21	3:50:00	1	0	1	0	CT	0	0	0	0	0	0	0	0	0	0	0	0	0	0	0	0	0	0	0	0	0	0	0	38	0	0	0	0	0	0	0	0	0	0
1351	3-Nov-21	3:55:00	1	0	1	0	CT	0	0	0	0	0	0	0	0	0	0	0	0	0	0	0	0	0	0	0	0	0	0	0	0	0	1	0	0	0	0	9	0	0	0
1352	3-Nov-21	4:00:00	1	0	1	0	CT	0	0	0	0	0	13	0	0	0	0	0	0	0	0	0	0	0	0	0	0	0	0	0	0	0	0	0	0	0	0	8	0	0	0
1353	3-Nov-21	4:05:00	1	0	1	0	CT	0	0	0	0	0	4	0	0	0	4	1	0	0	0	0	0	0	0	0	0	0	0	0	0	0	0	0	0	0	0	0	0	0	0
1354	3-Nov-21	4:10:00	1	0	1	0	CT	0	0	0	0	0	0	0	0	0	0	0	0	0	0	0	0	0	0	0	0	0	0	0	0	7	0	0	0	0	0	0	0	0	0
1355	3-Nov-21	4:15:00	1	0	1	0	CT	0	0	4	0	0	0	0	0	0	0	0	0	0	0	0	0	0	0	0	0	0	0	0	0	0	1	0	0	0	0	0	0	0	0
1356	3-Nov-21	4:20:00	1	0	1	0	CT	0	0	0	0	0	0	0	0	0	0	0	0	0	0	0	0	0	0	0	0	0	0	0	0	0	0	0	0	0	0	0	4	0	0
1357	3-Nov-21	4:25:00	1	0	1	0	CT	0	0	0	0	0	0	0	0	0	0	0	0	0	0	0	0	0	0	0	0	0	0	0	0	0	0	0	41	0	0	0	12	0	1
1358	3-Nov-21	4:30:00	1	0	1	0	CT	0	0	0	0	0	0	0	0	0	0	0	0	0	0	0	0	0	0	0	0	0	0	0	0	0	0	5	61	0	0	0	0	0	0
1359	3-Nov-21	4:35:00	1	0	1	0	CT	0	0	0	0	0	0	0	0	0	0	0	9	0	0	0	0	0	0	0	0	0	0	0	0	0	0	12	13	0	0	0	0	0	0
1360	3-Nov-21	4:40:00	1	0	1	0	CT	0	0	0	0	0	0	0	0	0	0	0	1	0	0	0	0	0	0	0	0	0	0	0	0	0	1	0	0	0	0	0	0	0	0
1361	3-Nov-21	4:45:00	1	0	1	0	CT	0	0	0	37	0	0	0	0	0	0	0	0	0	0	0	0	0	0	0	0	0	0	0	0	12	0	0	0	0	0	0	0	0	0
1362	3-Nov-21	4:50:00	1	0	1	0	CT	0	0	0	38	0	0	0	0	0	0	0	0	0	0	0	0	0	0	0	0	0	0	0	0	72	0	0	0	0	0	0	0	0	0
1363	3-Nov-21	4:55:00	1	0	1	0	CT	0	0	0	9	0	0	0	0	0	0	8	0	0	0	0	0	0	0	0	0	0	0	16	0	67	0	0	0	0	0	0	0	0	0
1364	3-Nov-21	5:00:00	1	0	1	0	CT	0	0	0	78	0	0	0	0	0	0	0	0	0	0	0	0	0	0	0	0	0	0	0	0	68	0	0	0	0	0	0	0	0	1
1365	3-Nov-21	5:05:00	1	0	1	0	CT	0	0	0	53	0	0	0	0	0	0	0	0	0	0	0	0	0	0	0	0	0	0	0	0	23	0	7	0	0	0	0	0	0	0
1366	3-Nov-21	5:10:00	1	0	1	0	CT	0	0	0	0	0	0	0	0	0	0	0	0	0	0	0	0	0	0	0	0	0	0	0	0	0	0	78	0	0	0	0	0	0	15
1367	3-Nov-21	5:15:00	1	0	1	0	CT	0	0	0	0	1	0	0	0	0	0	0	0	0	0	0	0	0	0	4	0	0	0	0	0	0	0	46	0	0	0	0	0	0	1
1368	3-Nov-21	5:20:00	1	0	1	0	CT	0	0	0	0	0	0	0	0	0	0	0	0	1	0	0	0	0	0	87	0	0	0	0	0	0	10	17	0	0	0	0	0	0	0
1369	3-Nov-21	5:25:00	1	0	1	0	CT	0	0	0	0	0	0	0	0	0	0	0	0	28	0	0	0	0	0	45	0	1	0	0	0	0	0	8	0	0	0	0	0	0	1
1370	3-Nov-21	5:30:00	1	0	1	0	CT	0	0	0	0	0	0	0	0	0	0	0	0	16	0	0	0	0	0	0	0	4	0	0	0	0	1	63	0	0	0	0	0	0	0
1371	3-Nov-21	5:35:00	1	0	1	0	CT	0	0	0	0	17	0	0	0	0	0	0	0	36	0	0	0	0	0	0	0	0	0	0	0	0	0	63	0	0	0	0	0	0	0
1372	3-Nov-21	5:40:00	1	0	1	0	CT	0	0	0	0	3	0	0	0	0	0	0	0	91	0	0	0	0	0	0	0	0	0	0	0	0	0	0	0	0	0	0	0	0	0
1373	3-Nov-21	5:45:00	1	0	1	0	CT	0	0	0	0	0	0	0	0	0	0	0	0	71	0	0	0	0	0	6	0	0	0	0	0	0	0	0	0	0	0	0	0	0	1
1374	3-Nov-21	5:50:00	1	0	1	0	CT	0	0	0	0	0	0	0	0	0	0	0	0	62	0	0	0	0	0	0	0	0	0	15	0	0	0	29	0	0	0	0	0	0	0
1375	3-Nov-21	5:55:00	1	0	1	0	CT	0	0	1	0	0	0	0	0	0	0	0	0	58	0	0	0	0	0	0	0	0	0	4	0	0	0	70	0	0	0	0	0	0	1
1376	3-Nov-21	6:00:00	1	0	1	0	CT	0	0	0	0	0	0	0	0	0	0	0	0	74	0	0	0	0	0	0	0	0	0	0	0	0	0	60	0	0	0	0	0	0	0
1377	3-Nov-21	6:05:00	1	0	1	0	CT	0	0	0	0	0	0	0	0	0	0	0	0	34	0	14	0	0	0	0	0	0	0	0	0	0	0	0	0	0	0	0	14	0	0
1378	3-Nov-21	6:10:00	1	0	1	0	CT	0	0	0	0	0	0	0	0	0	0	0	0	0	0	2	0	0	0	0	0	0	0	0	0	0	0	0	0	0	0	0	4	0	0
1379	3-Nov-21	6:15:00	1	0	1	0	CT	0	0	0	0	0	0	0	0	0	0	0	0	0	0	0	0	0	0	0	0	0	0	0	0	0	0	0	0	22	0	0	0	0	0
1380	3-Nov-21	6:20:00	1	0	1	0	CT	0	0	0	0	0	0	0	0	0	0	0	0	0	0	0	0	0	0	0	0	0	0	0	0	0	0	0	0	107	0	0	0	0	0
1381	3-Nov-21	6:25:00	1	0	1	0	CT	0	0	0	0	0	0	72	0	0	0	0	0	7	0	0	0	0	1	0	0	0	0	0	0	0	0	35	0	90	0	0	0	0	0
1382	3-Nov-21	6:30:00	1	0	1	0	CT	0	0	0	0	0	0	93	0	0	17	0	0	0	0	0	0	0	0	0	0	0	0	0	0	0	23	60	0	42	0	9	0	0	0
1383	3-Nov-21	6:35:00	1	0	1	0	CT	0	0	2	0	0	0	91	0	0	0	0	0	1	0	0	0	0	0	10	0	0	0	0	0	0	0	0	0	1	0	15	0	0	0
1384	3-Nov-21	6:40:00	1	0	1	0	CT	0	0	0	0	0	16	0	0	0	0	0	0	0	21	0	0	0	0	1	0	0	0	0	0	0	0	0	0	0	0	0	0	0	0
1385	3-Nov-21	6:45:00	1	0	1	0	CT	0	0	0	0	0	9	0	0	0	0	0	0	0	66	0	0	0	0	10	0	0	0	0	0	0	0	0	0	0	0	0	0	0	0
1386	3-Nov-21	6:50:00	1	0	1	0	CT	0	0	4	0	0	15	0	0	0	14	0	0	0	8	0	0	0	0	0	40	0	0	0	0	0	0	0	0	0	0	0	0	0	0
1387	3-Nov-21	6:55:00	1	0	1	0	CT	0	0	3	0	0	0	0	0	0	19	0	0	1	0	0	0	0	0	77	84	1	0	2	0	0	0	0	0	0	0	11	0	0	0
1388	3-Nov-21	7:00:00	1	0	1	0	CT	0	0	0	0	0	0	0	0	0	0	0	0	0	0	0	0	0	0	18	55	13	0	26	0	0	1	0	0	0	0	0	0	0	0
1389	3-Nov-21	7:05:00	1	0	1	0	CT	0	0	0	0	0	0	21	0	15	0	0	0	0	0	0	0	27	6	0	32	25	0	0	0	0	2	0	0	0	73	0	1	0	0
1390	3-Nov-21	7:10:00	1	0	1	0	CT	0	0	0	0	0	0	12	13	56	0	0	26	0	0	0	0	66	25	0	0	18	0	8	0	0	0	0	0	0	65	0	66	0	0
1391	3-Nov-21	7:15:00	1	0	1	0	CT	0	0	0	0	63	0	0	2	0	0	0	0	2	0	0	0	55	63	0	0	0	0	16	0	0	0	0	0	0	1	0	10	0	0
1392	3-Nov-21	7:20:00	1	0	1	0	CT	0	0	0	18	1	0	0	0	0	0	0	0	0	0	0	0	58	63	0	0	0	0	0	0	1	1	0	0	0	0	0	18	82	4
1393	3-Nov-21	7:25:00	1	0	1	0	CT	0	0	2	1	2	0	1	0	0	0	0	0	0	0	1	0	77	25	0	0	0	0	0	0	0	29	0	0	0	0	0	4	103	56
1394	3-Nov-21	7:30:00	1	0	1	0	CT	0	0	0	0	0	0	2	0	0	0	0	0	0	0	0	0	5	0	89	56	0	0	0	0	27	0	0	0	0	0	0	0	124	0
1395	3-Nov-21	7:35:00	1	0	1	0	CT	0	0	0	0	0	0	23	0	13	19	0	0	1	0	0	0	0	0	6	2	28	0	0	0	0	3	0	0	0	0	0	0	9	0
1396	3-Nov-21	7:40:00	1	0	1	0	CT	0	0	41	0	0	0	69	10	47	59	0	2	1	0	0	0	11	0	0	37	49	0	0	0	0	21	0	0	0	20	0	0	0	0
1397	3-Nov-21	7:45:00	1	0	1	0	CT	0	0	0	13	0	0	44	0	0	14	0	67	0	0	0	0	0	1	0	8	0	0	0	0	1	0	0	0	0	11	0	1	0	0
1398	3-Nov-21	7:50:00	1	0	1	0	CT	0	0	0	0	0	0	0	0	0	54	0	0	0	0	0	0	0	0	0	0	0	0	0	21	0	0	0	0	0	0	0	0	0	0
1399	3-Nov-21	7:55:00	1	0	1	0	CT	0	0	0	0	0	0	0	0	0	63	0	0	60	0	1	0	0	0	0	1	0	0	35	67	0	0	0	0	0	0	0	4	0	0
1400	3-Nov-21	8:00:00	1	0	1	0	CT	0	0	2	0	0	0	0	0	0	63	0	0	86	0	0	0	0	0	0	0	0	0	43	32	71	0	0	0	0	1	0	51	0	0
1401	3-Nov-21	8:05:00	1	0	1	0	CT	0	0	82	58	0	0	0	0	0	63	6	0	72	0	0	14	1	0	0	0	0	0	0	0	59	0	0	0	101	26	0	77	0	0
1402	3-Nov-21	8:10:00	1	0	1	0	CT	0	0	1	71	11	0	0	63	0	63	13	0	99	37	0	92	1	0	0	29	0	0	0	0	22	14	0	0	93	2	0	40	39	0
1403	3-Nov-21	8:15:00	1	0	1	0	CT	0	0	4	1	50	0	0	62	0	63	0	63	103	35	0	63	1	0	0	30	0	0	0	0	0	99	0	0	76	0	0	8	22	0
1404	3-Nov-21	8:20:00	1	0	1	0	CT	0	1	81	50	80	93	94	32	89	124	34	51	120	39	65	66	46	52	99	89	91	31	63	49	89	91	34	71	128	93	59	70	141	45
1405	3-Nov-21	8:25:00	1	0	1	0	CT	0	1	106	36	61	109	100	18	104	5	1	75	107	12	81	61	61	29	109	52	72	33	95	61	124	102	79	78	76	89	105	66	137	89
1406	3-Nov-21	8:30:00	1	0	1	0	CT	0	1	95	38	43	87	107	34	85	27	14	86	94	4	53	59	62	66	93	63	93	29	78	67	93	75	42	53	80	110	23	97	125	86
1407	3-Nov-21	8:35:00	1	0	1	0	CT	0	1	99	42	35	66	58	32	41	0	10	73	83	12	25	60	84	37	91	38	64	0	15	67	64	61	32	66	83	65	2	73	97	80
1408	3-Nov-21	8:40:00	1	0	1	0	CT	0	1	49	59	1	67	82	40	2	27	4	83	120	33	44	90	59	4	74	34	70	4	50	43	78	103	28	24	67	90	51	94	113	97
1409	3-Nov-21	8:45:00	1	0	1	0	CT	0	1	0	53	0	86	101	31	5	63	0	57	104	14	14	110	64	33	79	21	77	13	3	33	80	61	64	12	10	78	58	38	128	76
1410	3-Nov-21	8:50:00	1	0	1	0	CT	0	1	55	39	4	57	94	11	10	63	0	39	119	6	20	117	61	2	60	45	56	0	17	35	52	89	50	13	103	82	52	56	113	63
1411	3-Nov-21	8:55:00	1	0	1	0	CT	0	1	82	47	62	75	72	0	10	21	15	39	82	10	0	42	73	10	57	60	45	0	9	18	3	69	31	15	80	61	16	63	135	88
1412	3-Nov-21	9:00:00	1	0	1	0	CT	0	1	7	40	71	36	0	0	16	13	7	25	96	6	42	0	57	45	65	17	55	0	1	3	3	49	66	24	110	31	32	56	128	72
1413	3-Nov-21	9:05:00	1	0	1	0	CT	0	1	12	69	18	73	18	0	7	11	9	44	77	5	37	0	6	12	62	0	59	9	0	0	0	13	75	2	74	24	22	38	107	60
1414	3-Nov-21	9:10:00	1	0	1	0	CT	0	1	4	50	1	76	69	0	0	26	0	8	85	7	69	0	50	0	66	0	57	16	13	0	0	0	28	1	66	21	1	28	115	72
1415	3-Nov-21	9:15:00	1	0	1	0	CT	0	1	0	35	1	51	103	0	3	2	1	0	88	3	55	0	6	63	25	2	42	0	20	29	55	1	61	5	75	9	0	24	97	45
1416	3-Nov-21	9:20:00	1	0	1	0	CT	0	1	0	31	51	39	89	0	0	49	1	0	61	4	24	47	8	8	76	8	20	11	2	31	61	11	19	0	51	13	0	32	97	64
1417	3-Nov-21	9:25:00	1	0	1	0	CT	0	1	4	8	57	36	100	0	0	49	0	0	89	5	1	114	6	3	58	32	0	11	11	28	67	6	26	7	60	17	0	46	79	55
1418	3-Nov-21	9:30:00	1	0	1	0	CT	0	1	1	37	26	3	19	2	0	63	17	0	69	0	5	73	10	1	49	49	0	20	5	7	7	4	67	15	6	39	0	20	27	45
1419	3-Nov-21	9:35:00	1	0	1	0	CT	0	1	0	16	43	0	0	9	0	63	8	12	107	8	44	54	1	0	0	37	7	1	0	0	0	0	71	10	1	15	4	22	7	0
1420	3-Nov-21	9:40:00	1	0	1	0	CT	0	1	0	0	20	0	0	3	1	54	0	0	52	17	55	81	4	0	0	33	15	0	6	0	4	0	16	6	0	25	50	57	44	20
1421	3-Nov-21	9:45:00	1	0	1	0	CT	0	1	8	0	0	0	0	2	29	50	0	0	50	8	49	63	0	11	10	4	4	0	4	0	5	0	11	1	10	25	74	2	50	49
1422	3-Nov-21	9:50:00	1	0	1	0	CT	0	1	0	0	0	2	0	2	15	63	0	3	72	11	16	55	0	4	11	6	5	0	5	10	3	0	17	16	4	25	27	18	123	33
1423	3-Nov-21	9:55:00	1	0	1	0	CT	0	1	38	0	0	5	0	0	10	65	0	1	41	10	31	64	12	3	1	6	5	0	11	11	6	14	53	22	26	17	0	48	84	6
1424	3-Nov-21	10:00:00	1	0	1	0	CT	0	1	94	0	0	3	0	0	28	33	0	0	2	9	20	4	76	1	10	0	12	0	10	30	0	52	63	14	7	8	0	23	32	1
1425	3-Nov-21	10:05:00	1	0	1	0	CT	0	1	81	0	0	5	0	0	14	60	0	0	0	6	41	0	62	1	0	2	13	0	9	0	3	64	0	11	12	24	30	4	18	2
1426	3-Nov-21	10:10:00	1	0	1	0	CT	0	1	16	0	15	0	64	4	7	27	0	0	0	4	2	58	64	9	0	0	16	0	1	0	3	28	0	15	10	21	84	34	34	48
1427	3-Nov-21	10:15:00	1	0	1	0	CT	0	1	20	0	20	5	0	5	32	0	13	1	0	1	11	0	65	63	0	2	7	0	6	0	0	21	0	5	16	31	23	5	40	36
1428	3-Nov-21	10:20:00	1	0	1	0	CT	0	1	94	46	73	55	63	14	69	61	10	12	61	25	34	34	68	46	18	31	3	2	69	28	8	11	61	65	120	42	7	32	111	65
1429	3-Nov-21	10:25:00	1	0	1	0	CT	0	1	94	56	79	69	102	7	0	33	15	0	80	15	69	52	97	43	40	42	28	28	47	31	58	47	34	66	103	43	68	57	129	51
1430	3-Nov-21	10:30:00	1	0	1	0	CT	0	1	84	36	92	29	96	6	0	12	12	0	50	14	45	103	64	67	60	68	9	17	1	45	21	44	53	77	84	80	53	78	131	28
1431	3-Nov-21	10:35:00	1	0	1	0	CT	0	1	93	17	40	1	63	3	6	7	0	5	76	9	24	84	74	63	39	42	16	9	0	39	6	40	68	37	78	69	42	75	127	1
1432	3-Nov-21	10:40:00	1	0	1	0	CT	0	1	71	54	0	0	83	9	13	6	6	9	11	5	22	99	40	0	73	24	3	0	3	17	13	20	46	22	60	15	25	21	25	24
1433	3-Nov-21	10:45:00	1	0	1	0	CT	0	1	1	22	4	9	47	1	50	12	43	12	69	0	2	85	71	34	75	13	0	8	72	20	7	48	63	60	31	51	15	26	82	7
1434	3-Nov-21	10:50:00	1	0	1	0	CT	0	1	20	26	12	4	12	3	8	9	50	6	114	1	25	48	58	4	15	28	9	10	32	83	17	9	61	42	10	1	6	42	93	2
1435	3-Nov-21	10:55:00	1	0	1	0	CT	0	1	32	15	62	0	0	1	1	50	40	0	92	1	34	51	40	0	0	6	18	0	0	20	14	13	53	56	4	20	0	18	105	10
1436	3-Nov-21	11:00:00	1	0	1	0	CT	0	1	17	8	33	16	0	2	5	28	11	0	17	12	39	0	5	0	0	0	13	6	0	0	0	17	66	32	6	48	13	20	72	2
1437	3-Nov-21	11:05:00	1	0	1	0	CT	0	1	40	13	30	2	0	3	14	59	0	5	3	3	27	0	0	0	0	4	5	4	4	0	7	20	9	5	17	9	11	12	23	10
1438	3-Nov-21	11:10:00	1	0	1	0	CT	0	1	19	0	4	0	0	5	17	9	0	1	2	0	37	0	0	3	0	0	8	16	4	0	5	17	0	0	12	5	0	0	1	0
1439	3-Nov-21	11:15:00	1	0	1	0	CT	0	1	23	7	33	3	66	12	37	0	0	5	1	2	13	0	0	6	47	5	10	37	2	0	7	28	4	3	11	19	10	9	2	16
1440	3-Nov-21	11:20:00	1	0	1	0	CT	0	1	33	15	64	15	63	14	10	0	4	43	1	29	36	56	45	31	81	5	15	3	9	0	6	13	1	25	28	19	13	11	5	12
1441	3-Nov-21	11:25:00	1	0	1	0	CT	0	1	16	8	56	58	65	0	1	0	63	1	70	23	30	37	87	73	76	25	5	6	41	18	49	6	40	52	74	62	8	8	3	16
1442	3-Nov-21	11:30:00	1	0	1	0	CT	0	1	49	4	54	79	109	3	16	0	67	6	79	11	37	52	62	1	50	26	0	19	80	22	40	13	53	50	105	44	41	51	105	16
1443	3-Nov-21	11:35:00	1	0	1	0	CT	0	1	99	13	23	44	54	2	21	0	31	1	101	11	32	72	49	62	76	57	4	10	31	28	107	73	11	33	55	10	48	55	77	10
1444	3-Nov-21	11:40:00	1	0	1	0	CT	0	1	53	8	3	32	35	0	10	0	0	0	41	8	41	88	62	65	56	2	12	12	27	6	41	20	57	58	17	10	35	24	97	20
1445	3-Nov-21	11:45:00	1	0	1	0	CT	0	1	6	1	36	4	6	0	20	2	0	1	36	6	5	8	24	5	24	4	19	4	11	51	31	11	22	32	7	6	17	46	72	16
1446	3-Nov-21	11:50:00	1	0	1	0	CT	0	1	16	7	14	12	1	4	39	29	0	5	98	10	49	53	13	3	0	5	4	10	7	0	13	29	40	56	10	73	18	4	41	8
1447	3-Nov-21	11:55:00	1	0	1	0	CT	0	1	34	11	20	5	4	3	5	1	0	2	24	18	47	8	6	7	9	1	11	20	8	0	7	12	0	0	13	65	20	5	43	2
1448	3-Nov-21	12:00:00	1	0	1	0	CT	0	1	21	9	4	0	0	12	0	3	0	7	1	15	39	48	13	7	2	3	18	26	1	11	7	23	0	6	12	10	6	16	14	14
1449	3-Nov-21	12:05:00	1	0	1	0	CT	0	1	9	9	18	0	0	6	4	39	0	12	9	9	8	25	0	2	9	7	8	12	0	11	11	14	1	34	13	15	3	13	14	13
1450	3-Nov-21	12:10:00	1	0	1	0	CT	0	1	48	1	64	9	3	0	8	15	6	0	6	18	47	34	7	10	11	0	13	7	37	0	16	13	3	35	1	20	3	11	11	0
1451	3-Nov-21	12:15:00	1	0	1	0	CT	0	1	10	3	25	18	0	9	12	25	9	4	14	20	41	56	9	6	6	7	8	14	9	4	3	18	14	8	6	13	5	38	48	0
1452	3-Nov-21	12:20:00	1	0	1	0	CT	0	1	10	6	6	12	14	8	1	2	6	1	14	15	25	54	3	23	12	2	10	7	1	5	4	10	81	3	18	6	0	21	38	4
1453	3-Nov-21	12:25:00	1	0	1	0	CT	0	1	0	0	2	1	0	0	0	26	0	0	2	1	2	28	0	27	0	3	0	4	1	0	1	4	32	0	4	2	1	26	7	0
1454	3-Nov-21	12:30:00	1	0	1	0	CT	0	1	0	0	18	0	0	0	0	4	0	0	0	4	2	67	0	1	0	5	0	1	0	0	4	6	10	0	3	28	0	0	20	0
1455	3-Nov-21	12:35:00	1	0	1	0	CT	0	1	0	0	8	0	0	0	0	0	0	0	2	2	27	63	1	0	0	3	11	2	0	2	1	3	0	0	11	11	3	5	21	25
1456	3-Nov-21	12:40:00	1	0	1	0	CT	0	1	0	0	3	0	0	0	0	0	0	13	5	5	8	0	10	0	7	0	16	2	10	8	7	11	0	0	10	9	24	21	15	15
1457	3-Nov-21	12:45:00	1	0	1	0	CT	0	1	0	0	12	0	0	0	0	0	0	0	13	2	0	10	3	10	1	3	5	9	4	0	3	45	0	0	25	21	5	17	24	11
1458	3-Nov-21	12:50:00	1	0	1	0	CT	0	1	27	0	26	0	0	11	0	0	0	0	7	0	46	22	54	7	21	0	10	0	7	3	4	8	0	8	19	17	0	22	23	5
1459	3-Nov-21	12:55:00	1	0	1	0	CT	0	1	18	0	10	1	2	3	0	0	0	0	4	1	25	0	10	0	1	0	9	3	18	4	5	7	11	66	9	15	28	5	25	8
1460	3-Nov-21	13:00:00	1	0	1	0	CT	0	1	63	0	9	8	64	6	0	0	0	1	8	19	32	25	55	55	7	2	10	0	9	0	4	12	1	13	13	14	26	16	29	17
1461	3-Nov-21	13:05:00	1	0	1	0	CT	0	1	14	0	1	8	93	1	0	0	0	2	63	6	1	37	64	48	12	11	2	17	0	7	12	6	2	37	1	18	52	5	6	3
1462	3-Nov-21	13:10:00	1	0	1	0	CT	0	1	26	0	0	4	38	2	3	0	0	0	58	1	56	43	51	7	13	19	0	8	11	12	8	15	53	51	6	27	31	3	28	5
1463	3-Nov-21	13:15:00	1	0	1	0	CT	0	1	27	0	8	15	5	1	3	0	0	0	10	3	31	18	33	64	19	6	0	12	29	31	8	12	28	14	8	13	27	20	27	13
1464	3-Nov-21	13:20:00	1	0	1	0	CT	0	1	15	0	3	6	0	2	7	30	17	0	8	8	7	62	44	1	11	6	10	11	62	7	2	20	25	1	15	13	23	21	17	9
1465	3-Nov-21	13:25:00	1	0	1	0	CT	0	1	30	15	10	4	0	2	22	23	11	22	13	12	1	0	5	10	11	8	10	7	58	3	0	4	57	3	27	26	13	6	31	0
1466	3-Nov-21	13:30:00	1	0	1	0	CT	0	1	46	13	5	0	0	0	27	11	0	2	12	12	27	14	3	26	10	2	9	11	15	0	13	5	37	7	11	39	17	4	24	6
1467	3-Nov-21	13:35:00	1	0	1	0	CT	0	1	2	7	0	4	0	0	31	7	0	4	3	9	21	55	0	7	1	5	4	2	10	1	3	2	7	12	10	13	4	8	13	16
1468	3-Nov-21	13:40:00	1	0	1	0	CT	0	1	10	8	14	6	0	4	7	0	6	3	6	0	19	46	0	0	9	3	17	0	14	4	12	15	16	1	9	13	6	9	15	12
1469	3-Nov-21	13:45:00	1	0	1	0	CT	0	1	34	11	8	2	4	0	9	0	6	2	2	0	4	7	0	0	2	0	15	9	6	6	2	3	37	0	15	13	1	7	32	5
1470	3-Nov-21	13:50:00	1	0	1	0	CT	0	1	2	35	0	0	1	0	9	0	0	0	5	0	7	6	6	1	12	7	6	11	10	6	6	3	3	0	13	4	16	10	12	5
1471	3-Nov-21	13:55:00	1	0	1	0	CT	0	1	49	36	0	5	0	0	38	0	0	0	6	17	4	16	0	21	25	8	9	26	9	3	1	9	1	1	1	13	1	27	24	9
1472	3-Nov-21	14:00:00	1	0	1	0	CT	0	1	7	43	0	12	0	8	7	0	0	10	2	12	13	75	4	67	8	13	17	12	10	3	7	1	25	37	15	16	0	8	22	9
1473	3-Nov-21	14:05:00	1	0	1	0	CT	0	1	28	16	1	5	1	0	15	0	0	14	8	7	22	36	14	0	13	6	10	12	3	7	2	11	31	14	16	15	7	16	17	8
1474	3-Nov-21	14:10:00	1	0	1	0	CT	0	1	0	2	2	2	0	0	11	0	0	10	21	9	22	38	7	12	13	0	9	5	8	6	1	20	15	12	22	23	31	8	24	11
1475	3-Nov-21	14:15:00	1	0	1	0	CT	0	1	0	9	0	1	0	0	23	0	0	3	10	2	14	33	0	11	5	4	5	1	3	18	18	4	20	9	40	20	12	6	21	11
1476	3-Nov-21	14:20:00	1	0	1	0	CT	0	1	6	0	0	8	0	0	45	0	15	0	9	6	5	8	2	1	0	1	2	2	0	1	5	7	6	10	13	31	26	13	11	18
1477	3-Nov-21	14:25:00	1	0	1	0	CT	0	1	4	0	0	27	0	0	13	0	6	1	2	5	0	0	1	0	9	3	24	0	3	1	4	9	8	5	10	10	34	22	11	10
1478	3-Nov-21	14:30:00	1	0	1	0	CT	0	1	0	1	0	7	34	0	7	0	24	9	2	27	0	0	5	18	10	2	2	0	7	10	6	10	2	7	15	4	28	6	20	13
1479	3-Nov-21	14:35:00	1	0	1	0	CT	0	1	33	4	0	0	5	0	15	0	0	5	0	0	9	0	0	1	3	17	11	9	2	12	9	1	0	2	14	14	46	4	32	10
1480	3-Nov-21	14:40:00	1	0	1	0	CT	0	1	22	5	4	0	2	5	15	5	0	0	7	10	33	0	1	0	22	11	6	13	27	10	1	6	0	7	10	6	45	11	18	3
1481	3-Nov-21	14:45:00	1	0	1	0	CT	0	1	21	2	16	3	0	0	6	10	0	4	9	4	31	61	0	9	7	4	12	9	6	3	3	10	0	8	16	19	1	12	35	0
1482	3-Nov-21	14:50:00	1	0	1	0	CT	0	1	28	4	8	15	8	0	0	65	0	5	9	11	42	21	4	0	17	1	15	16	3	4	5	17	45	3	13	9	4	18	25	0
1483	3-Nov-21	14:55:00	1	0	1	0	CT	0	1	0	0	11	7	0	0	0	74	0	1	15	2	44	79	19	17	11	12	7	3	0	12	7	12	25	16	14	19	1	42	25	0
1484	3-Nov-21	15:00:00	1	0	1	0	CT	0	1	31	3	3	1	63	0	1	63	22	0	2	8	40	66	9	3	13	13	15	0	3	9	8	17	16	14	6	33	4	44	30	1
1485	3-Nov-21	15:05:00	1	0	1	0	CT	0	1	15	7	16	11	13	0	22	7	8	1	6	1	51	61	29	13	11	6	6	0	5	0	1	7	34	0	10	13	21	40	15	15
1486	3-Nov-21	15:10:00	1	0	1	0	CT	0	1	10	2	16	10	25	0	6	22	2	1	21	52	55	41	45	0	9	0	2	16	1	3	7	10	8	6	16	7	9	14	23	9
1487	3-Nov-21	15:15:00	1	0	1	0	CT	0	1	3	0	11	3	84	2	8	0	24	2	7	7	42	34	18	63	10	2	15	8	0	5	4	7	17	0	17	14	3	16	52	16
1488	3-Nov-21	15:20:00	1	0	1	0	CT	0	1	0	52	18	2	22	0	0	0	1	3	8	5	5	16	7	1	11	2	8	11	16	2	14	3	69	5	9	15	10	46	16	10
1489	3-Nov-21	15:25:00	1	0	1	0	CT	0	1	0	29	6	0	2	6	12	0	0	6	7	6	60	44	4	5	3	3	1	6	9	0	1	7	33	6	14	11	3	10	17	14
1490	3-Nov-21	15:30:00	1	0	1	0	CT	0	1	0	5	12	0	61	13	19	0	0	9	9	10	50	4	0	9	8	14	0	23	14	2	0	0	0	26	10	15	0	39	30	22
1491	3-Nov-21	15:35:00	1	0	1	0	CT	0	1	15	10	5	0	1	3	21	0	0	3	4	13	25	17	0	3	12	9	10	14	23	9	9	0	4	4	8	8	24	11	22	8
1492	3-Nov-21	15:40:00	1	0	1	0	CT	0	1	42	9	1	16	32	0	4	0	0	6	12	39	15	23	60	13	11	34	12	23	26	4	10	12	16	7	11	5	8	35	34	2
1493	3-Nov-21	15:45:00	1	0	1	0	CT	0	1	34	0	8	7	5	0	18	0	0	11	11	3	25	23	47	7	0	0	3	7	37	2	4	10	33	11	12	19	4	33	28	0
1494	3-Nov-21	15:50:00	1	0	1	0	CT	0	1	36	0	17	7	20	0	17	17	0	0	15	5	47	29	49	12	0	0	8	15	3	2	4	18	52	7	11	2	5	16	14	23
1495	3-Nov-21	15:55:00	1	0	1	0	CT	0	1	23	0	7	0	1	0	7	2	0	0	87	7	27	16	42	10	0	1	6	8	12	5	0	9	49	10	9	42	2	22	15	14
1496	3-Nov-21	16:00:00	1	0	1	0	CT	0	1	0	0	0	5	0	6	0	2	23	0	39	9	46	36	5	5	2	0	2	48	9	9	8	28	42	6	8	14	2	16	20	12
1497	3-Nov-21	16:05:00	1	0	1	0	CT	0	1	0	0	0	9	14	0	0	29	32	0	72	0	27	19	11	0	0	10	21	18	5	14	4	11	6	3	12	14	0	49	23	3
1498	3-Nov-21	16:10:00	1	0	1	0	CT	0	1	0	0	0	1	23	0	1	25	16	4	34	2	2	6	2	4	8	10	0	30	16	7	0	2	0	0	8	15	0	30	27	4
1499	3-Nov-21	16:15:00	1	0	1	0	CT	0	1	0	0	8	0	64	0	18	36	1	19	68	2	13	9	9	0	13	6	9	29	14	0	13	20	0	0	18	9	0	13	31	13
1500	3-Nov-21	16:20:00	1	0	1	0	CT	0	1	0	0	9	1	63	0	25	47	0	9	85	2	7	51	16	0	13	5	0	36	4	0	0	9	0	0	12	1	0	6	18	23
1501	3-Nov-21	16:25:00	1	0	1	0	CT	0	1	0	0	8	2	0	2	9	0	0	0	49	0	1	47	0	0	57	0	45	7	0	2	0	2	0	0	11	17	0	15	13	1
1502	3-Nov-21	16:30:00	1	0	1	0	CT	0	1	30	0	11	0	18	0	18	0	0	0	20	3	28	19	3	0	72	0	0	16	5	10	0	28	0	0	5	15	26	50	29	15
1503	3-Nov-21	16:35:00	1	0	1	0	CT	0	1	43	0	10	9	47	0	20	6	20	22	0	22	23	2	0	5	71	0	0	3	60	4	0	54	4	1	10	10	27	29	19	23
1504	3-Nov-21	16:40:00	1	0	1	0	CT	0	1	35	0	1	52	0	0	20	17	37	6	0	26	29	0	2	19	96	3	0	1	15	65	0	53	0	35	9	10	43	14	1	8
1505	3-Nov-21	16:45:00	1	0	1	0	CT	0	1	70	0	12	58	5	2	20	39	68	5	0	32	2	0	5	9	42	10	0	13	34	25	0	52	0	27	11	4	23	13	14	8
1506	3-Nov-21	16:50:00	1	0	1	0	CT	0	1	101	0	13	44	16	15	10	15	28	6	0	16	34	42	10	26	84	7	0	10	27	13	0	74	0	10	6	35	45	31	21	5
1507	3-Nov-21	16:55:00	1	0	1	0	CT	0	1	56	25	1	49	0	0	3	13	0	3	0	21	48	43	10	3	63	3	79	2	7	29	0	49	0	11	8	22	12	14	25	0
1508	3-Nov-21	17:00:00	1	0	1	0	CT	0	1	15	42	0	28	2	0	17	43	0	1	0	25	1	20	16	0	32	2	67	0	1	8	0	5	0	1	2	22	0	2	13	0
1509	3-Nov-21	17:05:00	1	0	1	0	CT	0	1	0	3	0	0	29	0	8	3	0	7	0	10	1	36	44	0	51	0	9	3	14	13	0	20	1	15	0	40	0	8	36	12
1510	3-Nov-21	17:10:00	1	0	1	0	CT	0	1	0	4	0	6	7	4	0	11	0	0	0	2	11	59	53	1	58	0	30	14	13	11	0	7	59	31	57	19	0	32	21	9
1511	3-Nov-21	17:15:00	1	0	1	0	CT	0	1	0	0	0	12	10	0	0	42	0	0	0	0	6	68	38	0	87	0	5	38	10	0	0	8	76	17	22	22	0	28	54	3
1512	3-Nov-21	17:20:00	1	0	1	0	CT	0	1	0	0	7	0	18	12	0	20	0	0	0	10	9	4	24	1	14	0	11	57	9	2	13	19	42	5	9	10	0	10	103	0
1513	3-Nov-21	17:25:00	1	0	1	0	CT	0	1	0	0	0	0	2	0	0	0	0	2	6	0	36	62	35	3	1	0	13	67	7	9	63	0	20	4	22	2	4	26	53	0
1514	3-Nov-21	17:30:00	1	0	1	0	CT	0	1	0	0	0	21	0	0	7	34	5	20	47	2	30	29	1	22	9	0	2	52	56	0	2	0	59	8	20	0	13	12	21	0
1515	3-Nov-21	17:35:00	1	0	1	0	CT	0	1	0	0	0	45	2	0	1	55	42	0	88	45	20	33	1	63	0	0	34	23	59	4	0	8	102	25	3	0	36	3	38	26
1516	3-Nov-21	17:40:00	1	0	1	0	CT	0	1	0	0	0	76	0	0	0	69	49	0	46	43	29	0	10	47	0	0	59	32	8	42	39	13	16	4	1	30	5	1	25	64
1517	3-Nov-21	17:45:00	1	0	1	0	CT	0	1	0	0	0	37	0	0	13	36	88	0	22	56	33	6	0	38	10	0	72	16	5	42	13	9	8	0	12	60	19	3	30	58
1518	3-Nov-21	17:50:00	1	0	1	0	CT	0	1	0	0	0	42	12	0	7	26	13	0	21	0	0	34	0	57	0	7	54	2	21	43	11	7	18	0	23	53	49	2	5	59
1519	3-Nov-21	17:55:00	1	0	1	0	CT	0	1	37	2	0	38	40	0	6	63	0	29	0	0	18	48	0	63	15	9	57	1	15	21	35	17	0	0	5	32	29	11	4	39
1520	3-Nov-21	18:00:00	1	0	1	0	CT	0	1	24	57	0	24	44	1	27	0	0	48	0	1	52	50	0	6	74	18	41	13	49	2	2	74	0	0	30	13	56	0	0	6
1521	3-Nov-21	18:05:00	1	0	1	0	CT	0	1	92	45	0	16	88	27	25	0	0	0	1	0	25	65	0	64	70	10	8	6	42	8	0	56	0	0	6	11	14	9	26	0
1522	3-Nov-21	18:10:00	1	0	1	0	CT	0	1	99	32	0	0	27	16	2	0	0	0	0	2	8	23	0	0	53	13	2	20	52	0	0	31	0	0	4	26	1	5	34	0
1523	3-Nov-21	18:15:00	1	0	1	0	CT	0	1	36	11	0	0	3	0	28	0	2	43	1	65	5	52	0	30	40	9	0	29	7	0	0	1	39	3	4	12	16	1	19	0
1524	3-Nov-21	18:20:00	1	0	1	0	CT	0	1	4	0	0	0	0	33	0	21	0	33	4	28	18	11	39	51	11	1	1	17	0	0	0	8	66	4	4	14	45	17	33	2
1525	3-Nov-21	18:25:00	1	0	1	0	CT	0	1	19	0	0	0	1	59	6	0	0	0	0	23	1	0	59	9	11	1	11	10	44	0	0	1	63	23	1	6	8	47	40	0
1526	3-Nov-21	18:30:00	1	0	1	0	CT	0	1	1	0	0	0	13	25	0	0	0	0	0	33	0	0	29	0	6	6	42	1	57	0	0	0	49	39	1	7	1	13	7	17
1527	3-Nov-21	18:35:00	1	0	1	0	CT	0	1	0	2	0	0	0	20	4	0	41	31	1	14	0	0	5	0	0	3	39	6	26	0	79	0	51	52	63	2	0	28	0	61
1528	3-Nov-21	18:40:00	1	0	1	0	CT	0	1	1	22	0	27	0	11	0	8	54	80	0	0	0	0	0	0	16	0	58	18	60	0	91	0	53	27	87	69	0	15	0	52
1529	3-Nov-21	18:45:00	1	0	1	0	CT	0	1	73	33	61	53	0	19	0	49	54	20	87	0	5	8	0	0	99	0	49	6	54	0	40	13	52	11	93	75	1	0	43	89
1530	3-Nov-21	18:50:00	1	0	1	0	CT	0	1	100	0	36	56	0	12	0	1	0	17	64	0	0	32	0	0	6	0	10	2	0	0	61	25	60	4	99	16	1	8	48	27
1531	3-Nov-21	18:55:00	1	0	1	0	CT	0	1	90	12	72	67	0	16	0	15	33	18	98	58	0	41	37	34	84	0	88	9	0	0	57	72	83	0	55	3	0	26	90	27
1532	3-Nov-21	19:00:00	1	0	1	0	CT	0	1	45	64	21	46	0	47	0	9	38	1	84	6	0	30	0	14	79	0	62	16	0	0	51	11	61	0	13	3	0	40	45	12
1533	3-Nov-21	19:05:00	1	0	1	0	CT	0	1	0	9	0	23	0	15	0	10	0	0	53	2	0	28	44	49	40	0	69	4	23	41	12	2	63	0	0	11	0	24	0	0
1534	3-Nov-21	19:10:00	1	0	1	0	CT	0	1	7	4	2	0	28	41	9	20	3	4	69	65	4	45	16	5	9	0	54	29	59	3	58	0	67	0	15	84	7	35	66	8
1535	3-Nov-21	19:15:00	1	0	1	0	CT	0	1	115	37	81	21	82	4	126	41	95	62	35	6	59	14	71	9	69	0	78	46	31	62	54	37	50	66	110	29	68	44	109	70
1536	3-Nov-21	19:20:00	1	0	1	0	CT	0	1	66	90	51	88	85	15	99	18	59	74	0	60	85	0	49	0	20	0	48	44	1	48	55	16	55	23	66	44	64	8	51	26
1537	3-Nov-21	19:25:00	1	0	1	0	CT	0	1	55	29	29	33	27	20	96	5	28	40	55	0	66	36	16	0	43	0	45	99	6	44	16	85	1	28	60	21	33	9	109	67
1538	3-Nov-21	19:30:00	1	0	1	0	CT	0	1	92	25	45	81	34	28	58	45	85	4	62	31	50	0	0	71	74	0	57	14	68	10	37	60	0	33	36	45	20	42	57	10
1539	3-Nov-21	19:35:00	1	0	1	0	CT	0	1	38	31	0	86	62	23	92	25	25	19	42	37	43	34	18	63	21	27	56	4	42	0	57	16	0	30	7	29	1	18	93	44
1540	3-Nov-21	19:40:00	1	0	1	0	CT	0	1	93	48	11	53	63	20	66	20	79	51	89	37	98	0	83	61	60	5	98	0	80	0	58	12	0	0	0	66	71	0	59	34
1541	3-Nov-21	19:45:00	1	0	1	0	CT	0	1	78	74	57	53	68	39	49	37	53	12	39	14	75	50	46	63	14	0	52	12	31	26	58	22	0	0	0	60	69	21	83	42
1542	3-Nov-21	19:50:00	1	0	1	0	CT	0	1	101	40	31	39	74	20	49	26	59	43	83	36	24	24	52	23	67	0	68	87	66	15	23	36	0	0	63	53	22	51	51	38
1543	3-Nov-21	19:55:00	1	0	1	0	CT	0	1	61	44	27	23	33	34	45	0	74	52	78	35	19	25	56	63	67	38	0	23	68	79	71	50	28	26	130	54	27	59	51	4
1544	3-Nov-21	20:00:00	1	0	1	0	CT	0	1	95	32	64	82	82	35	3	21	11	14	46	31	18	12	66	63	46	30	87	49	46	37	24	53	72	51	74	16	17	33	109	20
1545	3-Nov-21	20:05:00	1	0	1	0	CT	0	1	47	45	13	64	74	52	86	9	36	22	62	49	29	5	47	33	80	0	30	12	24	63	47	46	40	48	2	35	37	6	24	51
1546	3-Nov-21	20:10:00	1	0	1	0	CT	0	1	56	33	49	31	70	24	63	37	63	32	54	21	31	22	47	26	39	13	76	81	34	29	49	24	33	22	36	48	40	23	100	37
1547	3-Nov-21	20:15:00	1	0	1	0	CT	0	1	111	74	66	91	133	55	121	47	118	69	120	67	113	86	107	30	102	92	76	32	61	40	86	105	63	71	127	74	85	110	162	90
1548	3-Nov-21	20:20:00	1	0	1	0	CT	0	0	168	61	79	103	125	74	157	69	119	80	171	81	105	98	110	66	135	109	104	73	79	64	113	132	84	101	102	83	86	119	183	126
1549	3-Nov-21	20:25:00	1	0	1	0	CT	0	0	159	52	76	83	138	44	127	63	100	69	120	44	114	97	74	43	130	59	70	99	46	50	84	119	90	91	96	66	71	68	151	83
1550	3-Nov-21	20:30:00	1	0	1	0	CT	0	0	155	51	55	98	132	50	114	67	98	65	128	61	122	75	62	15	80	62	62	55	48	41	58	107	65	81	89	69	46	74	150	78
1551	3-Nov-21	20:35:00	1	0	1	0	CT	0	0	156	47	80	73	106	42	108	43	80	52	127	74	87	62	75	25	103	44	71	51	43	40	67	78	77	61	59	78	69	56	132	71
1552	3-Nov-21	20:40:00	1	0	1	0	CT	0	0	131	52	75	79	123	50	128	0	98	64	105	0	113	89	67	40	117	55	77	75	52	59	71	96	67	71	65	49	40	83	115	70
1553	3-Nov-21	20:45:00	1	0	1	0	CT	0	0	91	49	65	81	97	42	132	0	72	63	113	16	98	107	33	0	99	65	76	81	52	54	54	114	73	67	66	61	63	83	138	58
1554	3-Nov-21	20:50:00	1	0	1	0	CT	0	0	159	50	76	64	127	59	91	0	98	65	81	0	77	74	51	28	91	43	51	63	50	47	69	66	95	78	72	74	46	70	116	65
1555	3-Nov-21	20:55:00	1	0	1	0	CT	0	0	132	52	78	58	100	51	121	0	84	69	85	0	87	65	45	18	104	30	59	52	45	80	59	65	85	68	69	52	63	62	135	73
1556	3-Nov-21	21:00:00	1	0	1	0	CT	0	0	122	43	66	77	61	34	136	0	63	69	109	0	109	78	46	8	106	40	36	52	64	48	54	108	51	71	66	49	55	71	140	73
1557	3-Nov-21	21:05:00	1	0	1	0	CT	0	0	142	73	81	76	113	39	134	0	78	61	109	0	107	54	33	63	108	50	0	53	63	48	55	91	57	69	91	81	46	68	130	51
1558	3-Nov-21	21:10:00	1	0	1	0	CT	0	0	142	36	72	105	110	43	135	0	69	55	89	0	95	57	40	0	81	26	0	51	0	69	60	46	65	61	102	53	29	67	127	53
1559	3-Nov-21	21:15:00	1	0	1	0	CT	0	0	132	55	61	19	95	34	103	0	99	67	110	0	113	103	54	0	109	37	0	72	0	41	7	98	56	59	84	69	39	64	110	55
1560	3-Nov-21	21:20:00	1	0	1	0	CT	0	0	105	23	31	0	88	62	134	0	32	39	46	0	58	78	38	0	43	52	0	34	0	35	0	67	8	57	75	58	55	107	100	71
1561	3-Nov-21	21:25:00	1	0	1	0	CT	0	0	110	42	10	0	84	46	86	0	0	50	13	0	29	46	34	0	112	48	0	50	0	70	0	76	126	46	86	53	1	78	75	69
1562	3-Nov-21	21:30:00	1	0	1	0	CT	0	0	109	28	0	0	53	55	109	0	0	47	0	0	99	103	45	0	107	52	0	28	0	59	0	80	28	77	88	21	0	65	15	51
1563	3-Nov-21	21:35:00	1	0	1	0	CT	0	0	0	39	0	0	81	20	125	60	0	51	0	0	80	80	21	0	40	35	0	22	0	53	0	62	0	55	70	0	0	57	0	81
1564	3-Nov-21	21:40:00	1	0	1	0	CT	0	0	0	19	0	0	0	6	134	40	0	35	0	0	45	43	38	0	63	36	0	26	0	40	0	62	0	60	90	0	0	48	0	62
1565	3-Nov-21	21:45:00	1	0	1	0	CT	0	0	0	0	0	0	0	0	172	9	0	2	0	0	0	46	51	0	12	30	0	0	0	0	0	0	0	49	16	0	0	48	0	118
1566	3-Nov-21	21:50:00	1	0	1	0	CT	0	0	0	0	0	0	0	0	104	71	0	0	0	0	0	46	43	0	0	3	0	1	0	0	0	0	0	0	1	0	0	79	0	68
1567	3-Nov-21	21:55:00	1	0	1	0	CT	0	0	0	1	0	0	0	0	83	16	0	0	0	0	0	63	45	0	0	0	0	0	0	0	0	0	0	0	1	0	1	60	0	43
1568	3-Nov-21	22:00:00	1	0	1	0	CT	0	0	0	0	0	0	0	0	109	0	0	0	0	0	0	0	48	7	0	0	0	0	0	0	0	0	0	0	3	0	0	8	0	81
1569	3-Nov-21	22:05:00	1	0	1	0	CT	0	0	0	0	0	0	0	0	77	0	0	0	0	0	0	0	42	0	0	0	0	0	0	0	0	0	0	0	0	0	0	54	0	80
1570	3-Nov-21	22:10:00	1	0	1	0	CT	0	0	0	0	0	0	0	0	91	0	1	0	0	0	0	0	0	5	0	0	0	0	0	0	0	0	0	0	2	0	0	64	0	51
1571	3-Nov-21	22:15:00	1	0	1	0	CT	0	0	0	1	0	0	0	0	92	0	1	0	0	0	0	0	0	2	0	0	0	0	0	0	0	0	0	0	0	0	0	0	0	63
1572	3-Nov-21	22:20:00	1	0	1	0	CT	0	0	0	0	0	0	0	0	90	0	0	0	0	0	0	0	0	1	0	0	0	0	0	0	0	0	0	0	0	0	0	0	0	42
1573	3-Nov-21	22:25:00	1	0	1	0	CT	0	0	0	0	0	0	0	0	72	26	0	0	0	0	0	0	0	0	0	0	0	1	0	0	0	0	8	0	0	0	0	0	0	4
1574	3-Nov-21	22:30:00	1	0	1	0	CT	0	0	0	31	0	0	0	0	112	0	0	0	0	0	0	0	0	0	0	0	0	0	0	0	0	0	67	0	2	0	0	0	0	0
1575	3-Nov-21	22:35:00	1	0	1	0	CT	0	0	0	38	0	0	0	0	85	0	0	0	0	0	0	0	0	0	13	0	0	1	0	0	0	0	49	0	1	0	0	0	0	0
1576	3-Nov-21	22:40:00	1	0	1	0	CT	0	0	0	0	0	0	1	0	79	0	0	0	0	0	0	0	0	0	39	1	0	0	0	0	0	0	46	0	0	0	0	0	0	0
1577	3-Nov-21	22:45:00	1	0	1	0	CT	0	0	0	0	0	2	5	0	0	0	1	0	0	0	0	0	0	0	0	0	0	0	0	0	0	0	0	0	82	0	0	0	0	0
1578	3-Nov-21	22:50:00	1	0	1	0	CT	0	0	0	0	0	0	0	0	0	0	0	0	0	0	0	0	0	0	0	0	0	0	0	0	0	0	0	0	107	0	4	0	0	0
1579	3-Nov-21	22:55:00	1	0	1	0	CT	0	0	0	0	0	0	0	0	0	0	0	0	0	0	0	0	0	0	0	0	0	0	0	0	0	0	0	0	69	0	0	0	0	0
1580	3-Nov-21	23:00:00	1	0	1	0	CT	0	0	0	0	0	0	0	0	0	0	0	0	0	0	0	0	0	0	0	0	0	1	0	0	0	0	0	0	3	0	0	0	0	0
1581	3-Nov-21	23:05:00	1	0	1	0	CT	0	0	79	0	0	0	0	0	0	0	0	0	0	0	0	0	0	0	0	0	0	0	0	0	0	1	0	0	0	0	0	0	0	0
1582	3-Nov-21	23:10:00	1	0	1	0	CT	0	0	28	0	0	0	0	0	0	0	0	0	0	0	0	0	0	0	0	0	0	0	0	0	0	94	0	0	0	0	0	0	0	0
1583	3-Nov-21	23:15:00	1	0	1	0	CT	0	0	0	0	0	0	0	0	0	0	0	0	0	0	0	0	0	0	0	0	0	0	0	0	0	77	0	0	0	0	0	0	0	0
1584	3-Nov-21	23:20:00	1	0	1	0	CT	0	0	0	0	0	0	0	0	0	0	0	0	0	0	0	0	0	0	0	0	0	0	0	0	0	0	0	0	0	0	0	0	0	0
1585	3-Nov-21	23:25:00	1	0	1	0	CT	0	0	0	0	0	0	0	0	0	0	63	0	0	0	0	0	0	0	0	0	0	0	0	0	0	0	0	0	77	0	0	0	0	0
1586	3-Nov-21	23:30:00	1	0	1	0	CT	0	0	0	0	0	0	0	0	0	0	12	0	0	0	0	0	0	0	0	0	0	0	0	0	0	0	0	0	21	0	0	0	0	0
1587	3-Nov-21	23:35:00	1	0	1	0	CT	0	0	0	0	0	0	0	0	0	0	0	0	0	0	0	0	0	0	0	0	0	0	0	0	0	0	0	0	3	0	0	0	0	0
1588	3-Nov-21	23:40:00	1	0	1	0	CT	0	0	0	0	0	0	0	0	0	0	10	0	0	0	0	73	0	0	0	0	0	0	0	0	0	0	0	0	12	0	0	0	0	6
1589	3-Nov-21	23:45:00	1	0	1	0	CT	0	0	0	0	0	0	0	0	0	0	0	0	0	0	0	66	0	0	0	0	0	0	0	0	0	0	0	0	79	0	0	0	0	0
1590	3-Nov-21	23:50:00	1	0	1	0	CT	0	0	0	0	0	0	9	0	0	0	0	0	0	0	0	82	0	0	0	0	0	0	0	0	0	0	0	0	25	0	0	0	0	0
1591	3-Nov-21	23:55:00	1	0	1	0	CT	0	0	0	0	0	1	6	0	0	0	0	0	0	0	0	0	0	0	0	0	0	0	0	0	0	0	0	0	0	0	0	0	0	0
1592	4-Nov-21	0:00:00	1	0	1	0	CT	0	0	0	0	0	32	0	0	0	0	0	0	0	5	0	0	0	0	0	0	0	0	0	0	0	0	0	0	0	0	0	0	0	0
1593	4-Nov-21	0:05:00	1	0	1	0	CT	0	0	0	0	0	2	0	0	0	0	1	0	0	21	0	0	0	0	0	0	0	0	0	0	0	0	0	0	0	0	0	0	0	0
1594	4-Nov-21	0:10:00	1	0	1	0	CT	0	0	0	0	0	0	0	0	0	0	0	0	0	0	0	0	0	0	0	0	0	0	0	0	0	0	0	0	0	0	0	0	0	0
1595	4-Nov-21	0:15:00	1	0	1	0	CT	0	0	0	0	0	0	0	0	0	0	0	0	0	0	0	0	0	0	0	0	0	0	0	0	0	0	0	0	0	0	0	0	0	0
1596	4-Nov-21	0:20:00	1	0	1	0	CT	0	0	0	0	0	0	0	0	0	64	0	0	0	0	0	0	0	0	0	0	0	0	0	0	0	0	0	0	0	0	0	0	0	0
1597	4-Nov-21	0:25:00	1	0	1	0	CT	0	0	0	0	0	0	0	0	0	79	0	0	0	0	0	0	0	3	0	0	0	8	0	0	0	0	0	0	2	0	0	13	0	0
1598	4-Nov-21	0:30:00	1	0	1	0	CT	0	0	0	0	0	3	0	0	0	4	0	0	0	0	0	0	0	8	0	0	20	0	0	0	0	0	36	0	1	0	0	9	0	1
1599	4-Nov-21	0:35:00	1	0	1	0	CT	0	0	0	0	0	0	0	0	0	39	0	0	0	0	0	0	0	40	0	0	0	0	0	0	0	0	10	0	0	0	0	0	0	0
1600	4-Nov-21	0:40:00	1	0	1	0	CT	0	0	0	0	0	0	0	0	0	8	0	0	0	0	0	0	0	9	0	0	1	0	0	0	0	0	0	0	0	0	0	0	0	0
1601	4-Nov-21	0:45:00	1	0	1	0	CT	0	0	0	0	0	0	0	0	0	8	0	0	0	0	0	0	0	0	0	0	0	0	0	0	0	0	0	0	16	0	0	0	0	1
1602	4-Nov-21	0:50:00	1	0	1	0	CT	0	0	0	0	0	0	0	0	0	0	0	0	0	12	0	0	0	1	0	0	0	0	0	0	0	0	0	0	2	0	0	0	0	53
1603	4-Nov-21	0:55:00	1	0	1	0	CT	0	0	0	0	0	0	0	0	0	0	0	0	0	0	0	1	0	0	0	0	0	0	0	0	0	0	0	0	0	0	0	0	0	45
1604	4-Nov-21	1:00:00	1	0	1	0	CT	0	0	0	0	0	0	13	0	0	0	1	0	0	0	0	0	0	0	0	0	0	0	0	0	0	0	0	0	0	0	0	0	0	0
1605	4-Nov-21	1:05:00	1	0	1	0	CT	0	0	70	0	0	0	44	0	0	17	0	0	0	0	0	0	0	0	0	0	0	0	0	0	0	0	0	0	0	0	0	0	0	0
1606	4-Nov-21	1:10:00	1	0	1	0	CT	0	0	67	0	0	0	0	4	0	57	0	0	0	0	0	0	0	0	0	0	0	0	0	0	0	0	4	0	0	0	0	0	0	0
1607	4-Nov-21	1:15:00	1	0	1	0	CT	0	0	33	0	0	0	0	82	0	63	0	0	0	0	0	53	0	0	0	9	1	0	1	0	0	0	0	0	0	0	0	0	0	0
1608	4-Nov-21	1:20:00	1	0	1	0	CT	0	0	0	0	0	1	0	56	0	19	2	0	0	0	0	1	0	0	0	4	0	9	0	0	3	0	0	0	0	0	0	0	0	0
1609	4-Nov-21	1:25:00	1	0	1	0	CT	0	0	0	0	0	20	0	64	0	18	0	0	0	0	0	0	0	0	0	0	0	0	0	0	0	0	0	0	0	0	0	0	0	0
1610	4-Nov-21	1:30:00	1	0	1	0	CT	0	0	0	0	0	26	0	0	0	4	0	0	0	0	0	0	0	0	0	0	0	0	0	0	0	0	0	0	0	0	0	0	0	0
1611	4-Nov-21	1:35:00	1	0	1	0	CT	0	0	0	0	0	55	0	0	0	0	0	0	0	0	0	0	0	0	0	0	0	0	0	0	0	0	0	0	0	0	0	0	0	0
1612	4-Nov-21	1:40:00	1	0	1	0	CT	0	0	0	0	0	0	0	0	0	0	0	0	0	0	1	0	0	1	0	0	0	0	0	0	0	0	0	0	36	53	0	0	0	0
1613	4-Nov-21	1:45:00	1	0	1	0	CT	0	0	0	0	0	0	0	0	0	0	0	0	0	0	49	0	0	0	0	0	0	0	0	0	0	0	0	0	85	51	0	0	0	0
1614	4-Nov-21	1:50:00	1	0	1	0	CT	0	0	0	0	0	0	43	0	0	0	0	0	0	0	0	0	0	0	0	0	0	0	0	0	0	0	0	0	97	2	0	0	0	0
1615	4-Nov-21	1:55:00	1	0	1	0	CT	0	0	0	0	0	0	12	0	0	0	0	0	0	0	0	0	0	0	0	0	0	0	0	0	0	0	0	0	101	0	0	0	0	0
1616	4-Nov-21	2:00:00	1	0	1	0	CT	0	0	0	0	0	0	0	0	0	0	0	0	0	1	0	0	0	0	0	0	0	0	0	0	0	0	0	0	49	0	0	0	0	0
1617	4-Nov-21	2:05:00	1	0	1	0	CT	0	0	0	0	0	0	0	0	0	43	10	0	0	0	0	0	0	42	0	0	0	0	0	0	0	0	0	0	90	0	0	0	0	0
1618	4-Nov-21	2:10:00	1	0	1	0	CT	0	0	0	0	0	0	0	0	0	30	0	0	0	0	0	0	0	3	0	0	0	0	0	0	0	0	0	0	54	0	0	0	0	0
1619	4-Nov-21	2:15:00	1	0	1	0	CT	0	0	0	0	0	0	0	0	0	0	0	0	0	0	0	0	0	57	0	0	1	0	0	0	0	0	0	0	0	0	0	0	0	0
1620	4-Nov-21	2:20:00	1	0	1	0	CT	0	0	0	4	0	0	0	0	0	0	0	0	0	0	0	0	0	63	0	0	0	0	0	0	0	0	1	0	0	0	0	0	0	0
1621	4-Nov-21	2:25:00	1	0	1	0	CT	0	0	0	62	0	0	0	0	0	0	0	0	0	0	0	0	0	0	0	0	0	0	0	0	0	0	0	0	0	0	0	0	0	0
1622	4-Nov-21	2:30:00	1	0	1	0	CT	0	0	0	16	0	0	0	0	0	0	0	0	0	19	0	0	0	0	24	0	0	0	0	0	0	0	0	0	0	0	0	0	0	0
1623	4-Nov-21	2:35:00	1	0	1	0	CT	0	0	0	31	0	0	0	0	0	0	0	0	0	0	0	0	0	0	58	0	4	0	0	0	0	0	0	0	0	0	0	0	0	0
1624	4-Nov-21	2:40:00	1	0	1	0	CT	0	0	0	0	0	0	0	0	0	0	0	0	0	2	0	0	0	0	81	0	0	0	0	0	0	0	0	0	0	0	0	0	0	0
1625	4-Nov-21	2:45:00	1	0	1	0	CT	0	0	0	1	0	0	0	0	0	0	3	0	0	0	0	0	0	0	18	0	0	0	0	0	0	0	0	0	0	0	0	0	0	0
1626	4-Nov-21	2:50:00	1	0	1	0	CT	0	0	0	0	0	0	0	0	0	0	12	0	0	0	0	0	0	0	0	0	7	0	0	0	0	0	0	4	0	0	0	0	0	0
1627	4-Nov-21	2:55:00	1	0	1	0	CT	0	0	0	0	0	0	0	0	0	0	30	0	0	31	0	0	0	0	0	0	28	0	0	0	0	0	0	46	0	0	0	0	0	0
1628	4-Nov-21	3:00:00	1	0	1	0	CT	0	0	0	0	0	0	0	0	0	0	49	0	0	55	0	0	0	0	0	0	2	0	0	0	3	0	0	53	0	0	0	0	0	0
1629	4-Nov-21	3:05:00	1	0	1	0	CT	0	0	0	0	0	0	0	0	0	0	0	0	0	9	0	0	0	0	0	0	4	0	0	0	0	0	0	18	0	0	0	0	0	0
1630	4-Nov-21	3:10:00	1	0	1	0	CT	0	0	0	0	0	0	0	0	0	0	0	0	0	0	0	0	0	0	2	0	7	0	0	0	0	0	0	0	0	0	0	0	0	0
1631	4-Nov-21	3:15:00	1	0	1	0	CT	0	0	0	1	0	0	0	0	0	0	0	0	0	0	0	0	0	0	3	0	0	1	0	0	0	0	0	0	0	0	0	0	0	0
1632	4-Nov-21	3:20:00	1	0	1	0	CT	0	0	0	52	0	0	63	0	0	0	0	0	0	0	0	0	0	0	0	0	0	0	0	0	0	0	0	0	0	0	0	0	0	0
1633	4-Nov-21	3:25:00	1	0	1	0	CT	0	0	0	3	0	0	63	0	0	0	0	0	0	0	0	25	0	0	0	0	0	0	0	0	0	0	0	0	0	0	0	0	0	0
1634	4-Nov-21	3:30:00	1	0	1	0	CT	0	0	0	0	0	0	7	0	0	0	0	0	0	0	0	80	0	0	8	0	1	0	0	0	0	0	0	0	0	0	0	0	0	0
1635	4-Nov-21	3:35:00	1	0	1	0	CT	0	0	0	0	0	0	0	0	0	0	0	0	0	0	0	0	0	0	55	0	0	0	0	0	0	0	0	0	0	0	0	0	0	0
1636	4-Nov-21	3:40:00	1	0	1	0	CT	0	0	0	0	0	0	0	0	0	0	0	0	0	0	0	0	0	0	92	0	0	0	0	0	0	0	0	0	0	0	0	1	0	0
1637	4-Nov-21	3:45:00	1	0	1	0	CT	0	0	0	0	0	0	0	0	0	0	0	0	38	0	0	0	0	0	83	0	0	2	0	0	0	0	0	0	0	25	0	0	0	0
1638	4-Nov-21	3:50:00	1	0	1	0	CT	0	0	0	0	0	0	0	0	0	0	0	2	70	0	0	0	0	0	62	0	0	1	0	0	0	0	3	0	0	55	0	0	0	0
1639	4-Nov-21	3:55:00	1	0	1	0	CT	0	0	0	0	0	0	0	0	0	0	0	0	73	0	0	0	0	0	0	0	0	0	0	0	0	0	12	0	0	8	0	0	0	0
1640	4-Nov-21	4:00:00	1	0	1	0	CT	0	0	0	0	0	0	0	0	0	0	0	0	80	0	0	0	0	0	0	0	0	0	0	0	0	0	0	0	0	3	0	0	3	0
1641	4-Nov-21	4:05:00	1	0	1	0	CT	0	0	0	0	0	0	0	0	0	0	0	0	74	0	0	0	0	0	0	0	0	0	0	0	0	0	1	0	0	35	0	0	114	0
1642	4-Nov-21	4:10:00	1	0	1	0	CT	0	0	0	0	0	0	0	0	0	0	0	0	49	0	0	0	0	0	0	0	0	0	0	0	0	0	0	0	0	0	0	0	133	0
1643	4-Nov-21	4:15:00	1	0	1	0	CT	0	1	62	35	12	26	30	14	21	20	47	17	90	30	74	44	38	21	68	15	73	21	16	65	22	28	34	19	55	92	16	26	173	44
1644	4-Nov-21	4:20:00	1	0	1	0	CT	0	1	64	51	0	29	99	0	56	46	19	20	91	12	47	15	95	26	107	8	42	34	86	41	2	29	122	13	33	94	19	23	125	50
1645	4-Nov-21	4:25:00	1	0	1	0	CT	0	1	113	29	3	54	75	11	67	40	2	0	86	19	32	0	62	6	91	10	16	17	44	48	25	26	49	9	9	20	1	12	70	14
1646	4-Nov-21	4:30:00	1	0	1	0	CT	0	1	124	27	0	61	61	2	14	19	0	0	80	15	20	14	14	5	63	6	0	0	11	53	23	19	66	7	11	20	0	7	64	14
1647	4-Nov-21	4:35:00	1	0	1	0	CT	0	1	89	33	0	78	55	14	7	64	14	0	69	14	65	60	28	38	91	3	1	0	22	35	12	25	63	9	23	25	8	93	21	88
1648	4-Nov-21	4:40:00	1	0	1	0	CT	0	1	106	42	0	69	83	66	0	85	4	0	15	12	42	52	4	7	71	16	47	0	62	69	7	6	38	10	13	17	13	73	11	84
1649	4-Nov-21	4:45:00	1	0	1	0	CT	0	1	77	8	2	52	66	36	5	29	0	0	52	10	41	64	5	1	84	6	87	1	1	76	5	9	43	12	21	29	16	29	36	77
1650	4-Nov-21	4:50:00	1	0	1	0	CT	0	1	97	0	15	80	48	34	0	25	17	8	88	11	42	50	46	0	92	8	77	0	4	58	7	3	104	29	115	58	11	65	96	66
1651	4-Nov-21	4:55:00	1	0	1	0	CT	0	1	107	21	2	70	128	30	20	26	1	1	77	9	54	18	74	0	63	10	27	47	55	44	26	16	58	22	79	87	8	74	104	21
1652	4-Nov-21	5:00:00	1	0	1	0	CT	0	1	1	38	8	61	19	36	6	33	0	0	100	10	1	0	66	0	69	1	10	43	53	55	13	11	76	25	68	70	0	63	98	37
1653	4-Nov-21	5:05:00	1	0	1	0	CT	0	1	7	50	0	33	0	44	1	85	0	0	102	6	0	0	60	0	104	0	4	68	42	34	14	8	42	78	97	47	3	68	120	47
1654	4-Nov-21	5:10:00	1	0	1	0	CT	0	1	0	28	0	0	0	7	0	47	0	40	43	1	0	0	61	0	73	1	0	12	6	44	8	11	36	72	106	68	22	69	111	41
1655	4-Nov-21	5:15:00	1	0	1	0	CT	0	1	22	62	18	0	0	0	0	85	0	4	59	8	18	56	64	65	52	12	18	0	0	34	7	17	72	67	123	35	17	29	106	32
1656	4-Nov-21	5:20:00	1	0	1	0	CT	0	1	94	39	78	0	63	0	1	44	7	0	81	31	78	46	45	63	16	11	19	1	3	8	8	13	41	105	102	16	6	46	99	38
1657	4-Nov-21	5:25:00	1	0	1	0	CT	0	1	111	13	88	0	57	0	10	21	50	0	58	54	36	41	57	71	0	8	26	1	3	52	16	15	36	29	33	25	0	24	94	33
1658	4-Nov-21	5:30:00	1	0	1	0	CT	0	1	32	18	90	35	10	0	11	7	21	1	54	8	36	61	49	9	0	23	24	0	6	17	23	13	29	58	74	29	1	30	107	28
1659	4-Nov-21	5:35:00	1	0	1	0	CT	0	1	4	7	54	54	24	0	33	0	0	4	117	0	23	32	47	63	0	39	3	0	0	0	69	8	32	37	97	15	17	20	57	0
1660	4-Nov-21	5:40:00	1	0	1	0	CT	0	1	0	6	93	56	37	0	17	0	0	4	28	0	72	0	80	43	28	21	6	38	5	0	49	15	41	47	54	20	11	44	59	0
1661	4-Nov-21	5:45:00	1	0	1	0	CT	0	1	0	6	30	5	0	0	11	0	0	8	0	0	62	0	70	42	4	26	18	8	45	0	71	9	34	33	36	22	17	29	76	0
1662	4-Nov-21	5:50:00	1	0	1	0	CT	0	1	59	0	0	0	0	0	6	0	0	10	1	0	36	9	54	10	0	17	7	13	60	0	44	9	15	53	92	21	11	48	46	28
1663	4-Nov-21	5:55:00	1	0	1	0	CT	0	1	6	0	0	0	0	0	1	3	29	7	0	0	75	10	36	6	18	27	18	0	53	0	36	16	0	67	60	10	13	30	48	22
1664	4-Nov-21	6:00:00	1	0	1	0	CT	0	1	0	0	0	0	0	0	8	42	36	2	0	0	71	10	27	41	57	33	22	0	24	65	44	2	0	20	51	5	0	39	31	37
1665	4-Nov-21	6:05:00	1	0	1	0	CT	0	1	0	0	0	56	0	0	12	12	31	6	8	0	49	39	58	72	38	14	21	0	8	66	31	6	0	0	28	26	0	25	46	29
1666	4-Nov-21	6:10:00	1	0	1	0	CT	0	1	0	1	0	65	0	45	22	0	0	8	77	0	27	40	29	12	60	11	17	0	10	42	97	6	0	0	8	46	4	38	29	1
1667	4-Nov-21	6:15:00	1	0	1	0	CT	0	1	3	11	0	58	0	0	11	0	0	7	79	0	21	62	61	0	13	6	21	1	2	38	9	6	0	0	8	54	0	43	33	32
1668	4-Nov-21	6:20:00	1	0	1	0	CT	0	1	6	19	0	32	0	5	17	12	0	9	66	0	21	72	44	0	12	1	11	2	0	3	39	13	0	0	7	72	0	34	43	38
1669	4-Nov-21	6:25:00	1	0	1	0	CT	0	1	0	6	0	0	44	5	19	35	0	0	62	0	43	0	14	1	10	5	4	6	0	6	39	21	0	0	18	40	8	7	21	14
1670	4-Nov-21	6:30:00	1	0	1	0	CT	0	1	0	4	8	13	46	6	11	59	0	2	0	19	22	0	7	22	10	34	4	20	0	32	21	23	13	0	16	65	39	0	41	42
1671	4-Nov-21	6:35:00	1	0	1	0	CT	0	1	0	0	36	1	74	2	18	26	1	5	10	20	2	1	44	0	10	23	18	14	0	20	12	24	75	2	3	65	67	7	13	42
1672	4-Nov-21	6:40:00	1	0	1	0	CT	0	1	0	12	77	7	107	8	16	92	0	10	5	4	45	0	61	13	19	0	12	5	0	11	40	46	48	0	1	38	37	50	3	0
1673	4-Nov-21	6:45:00	1	0	1	0	CT	0	1	0	9	65	0	24	3	25	18	18	13	5	6	53	0	63	36	16	12	25	17	0	33	28	81	62	0	3	12	58	24	20	4
1674	4-Nov-21	6:50:00	1	0	1	0	CT	0	1	0	14	27	0	24	3	4	36	89	2	1	2	66	51	33	29	12	35	6	18	32	0	6	64	80	0	10	8	37	48	93	3
1675	4-Nov-21	6:55:00	1	0	1	0	CT	0	1	0	64	77	0	0	2	12	97	87	2	5	1	56	81	3	27	4	11	12	24	25	0	11	37	76	0	16	34	51	25	91	2
1676	4-Nov-21	7:00:00	1	0	1	0	CT	0	1	0	44	13	0	0	0	12	7	44	3	2	7	65	39	0	6	21	28	16	27	30	17	7	40	95	0	6	35	37	20	114	0
1677	4-Nov-21	7:05:00	1	0	1	0	CT	0	1	0	30	0	0	4	0	5	15	0	3	78	30	47	19	1	0	5	5	9	24	54	75	8	30	43	11	19	59	2	37	104	0
1678	4-Nov-21	7:10:00	1	0	1	0	CT	0	1	0	52	21	17	0	0	1	13	0	1	108	8	58	57	0	0	16	14	9	9	67	68	6	20	74	64	63	13	29	29	100	0
1679	4-Nov-21	7:15:00	1	0	1	0	CT	0	1	23	22	41	52	0	0	25	18	0	0	56	29	64	3	0	1	36	4	12	4	7	11	5	53	25	73	104	5	39	25	76	0
1680	4-Nov-21	7:20:00	1	0	1	0	CT	0	1	105	0	58	35	0	0	26	0	0	47	17	12	18	29	0	0	69	5	0	0	28	38	1	68	37	90	61	9	31	34	99	0
1681	4-Nov-21	7:25:00	1	0	1	0	CT	0	1	93	0	49	18	0	0	10	0	0	7	5	6	55	85	0	4	72	5	2	0	29	50	5	73	51	42	97	27	36	4	115	0
1682	4-Nov-21	7:30:00	1	0	1	0	CT	0	1	92	0	5	4	63	0	26	0	0	16	3	2	58	25	0	2	80	0	9	1	41	39	4	11	0	45	58	13	24	1	71	25
1683	4-Nov-21	7:35:00	1	0	1	0	CT	0	1	54	0	1	1	54	0	15	0	1	10	10	0	58	0	39	1	57	36	13	1	6	19	4	16	0	57	37	61	30	2	58	51
1684	4-Nov-21	7:40:00	1	0	1	0	CT	0	1	101	0	1	15	77	0	9	0	0	6	48	9	28	0	62	8	39	33	6	3	59	0	53	15	8	70	76	42	28	43	58	46
1685	4-Nov-21	7:45:00	1	0	1	0	CT	0	1	106	0	27	11	0	0	6	0	0	16	45	7	43	5	38	0	7	21	19	9	0	2	39	14	0	73	32	13	27	46	16	21
1686	4-Nov-21	7:50:00	1	0	1	0	CT	0	1	71	23	21	9	26	0	16	0	8	8	52	20	22	34	82	0	8	19	31	2	0	47	53	14	1	57	8	10	37	11	65	38
1687	4-Nov-21	7:55:00	1	0	1	0	CT	0	1	26	75	11	10	15	4	11	17	55	1	65	15	61	65	51	0	12	7	24	0	1	35	51	25	0	48	11	8	16	41	74	35
1688	4-Nov-21	8:00:00	1	0	1	0	CT	0	1	4	29	2	0	0	8	20	10	41	2	52	16	31	12	42	0	35	5	60	2	30	0	6	48	60	18	14	13	19	26	101	4
1689	4-Nov-21	8:05:00	1	0	1	0	CT	0	1	0	2	12	0	0	1	51	0	14	4	50	5	35	31	16	0	84	7	56	18	13	37	8	66	68	45	12	10	38	34	54	11
1690	4-Nov-21	8:10:00	1	0	1	0	CT	0	1	0	2	0	0	0	6	0	63	1	0	10	41	22	93	43	3	81	5	56	76	4	60	10	31	47	24	5	33	0	24	82	20
1691	4-Nov-21	8:15:00	1	0	1	0	CT	0	1	6	5	5	0	0	1	0	48	14	2	1	7	17	48	61	10	64	22	28	66	1	51	4	36	50	60	8	54	33	10	35	41
1692	4-Nov-21	8:20:00	1	0	1	0	CT	0	1	0	5	19	0	10	0	5	65	14	3	1	3	36	9	39	75	32	30	48	57	0	70	7	52	58	10	5	34	12	44	79	33
1693	4-Nov-21	8:25:00	1	0	1	0	CT	0	1	0	6	14	0	52	33	17	58	4	50	18	0	35	5	1	75	115	8	45	27	11	66	86	40	42	14	9	40	10	56	64	31
1694	4-Nov-21	8:30:00	1	0	1	0	CT	0	1	0	13	84	55	5	0	28	73	14	2	19	9	48	41	27	45	61	3	21	1	10	63	35	11	23	2	9	19	60	36	59	25
1695	4-Nov-21	8:35:00	1	0	1	0	CT	0	1	84	68	87	38	25	0	19	41	3	10	15	4	28	2	50	71	54	4	3	65	20	36	10	47	64	3	10	40	44	39	54	19
1696	4-Nov-21	8:40:00	1	0	1	0	CT	0	1	96	68	37	87	3	0	27	16	31	6	3	0	78	34	69	49	38	5	20	66	4	40	5	62	66	0	7	51	8	27	27	25
1697	4-Nov-21	8:45:00	1	0	1	0	CT	0	1	91	83	0	85	0	2	22	21	19	11	22	12	51	0	28	18	0	18	15	25	9	9	2	46	30	1	19	35	33	38	119	15
1698	4-Nov-21	8:50:00	1	0	1	0	CT	0	1	86	25	9	41	6	12	12	33	0	1	45	13	23	4	0	51	1	11	19	16	4	0	60	12	60	7	10	24	19	18	45	2
1699	4-Nov-21	8:55:00	1	0	1	0	CT	0	1	0	13	4	10	37	0	23	51	0	7	75	16	74	9	2	48	21	23	6	28	1	6	23	16	33	0	36	18	6	28	9	18
1700	4-Nov-21	9:00:00	1	0	1	0	CT	0	1	3	1	17	33	95	0	28	0	0	11	53	0	54	7	16	0	21	29	9	40	0	41	22	24	61	0	67	22	2	29	24	20
1701	4-Nov-21	9:05:00	1	0	1	0	CT	0	1	2	7	13	54	88	0	7	0	0	6	85	15	69	5	75	3	14	31	21	31	4	64	46	30	24	26	86	2	0	0	93	18
1702	4-Nov-21	9:10:00	1	0	1	0	CT	0	1	0	10	9	39	77	0	22	0	0	0	46	4	4	27	49	0	15	18	3	8	0	8	15	8	27	58	125	13	34	1	96	23
1703	4-Nov-21	9:15:00	1	0	1	0	CT	0	1	0	0	11	34	69	3	19	0	0	0	57	7	53	53	48	0	19	36	16	20	0	0	30	3	29	26	81	18	61	5	97	18
1704	4-Nov-21	9:20:00	1	0	1	0	CT	0	1	0	4	8	32	0	5	12	0	0	4	20	3	48	56	50	0	17	7	5	23	0	2	51	15	52	39	31	20	17	23	84	23
1705	4-Nov-21	9:25:00	1	0	1	0	CT	0	1	0	7	8	0	7	8	16	52	16	7	14	7	72	10	66	0	6	2	2	16	11	0	9	11	43	18	15	8	32	71	3	7
1706	4-Nov-21	9:30:00	1	0	1	0	CT	0	1	25	13	0	8	0	0	13	33	15	3	12	10	25	17	29	0	3	7	13	9	38	50	8	13	75	13	16	3	20	29	8	16
1707	4-Nov-21	9:35:00	1	0	1	0	CT	0	1	90	1	0	15	0	0	26	63	5	3	3	7	38	42	2	0	38	18	16	13	15	5	7	11	5	2	15	0	52	66	50	18
1708	4-Nov-21	9:40:00	1	0	1	0	CT	0	1	52	2	24	7	0	0	24	3	2	3	9	17	16	24	15	1	85	12	10	26	12	23	7	4	2	0	57	54	42	27	85	17
1709	4-Nov-21	9:45:00	1	0	1	0	CT	0	1	23	3	79	5	0	0	19	0	0	6	14	16	73	51	6	2	60	28	4	40	11	46	4	6	1	31	79	38	10	29	55	21
1710	4-Nov-21	9:50:00	1	0	1	0	CT	0	1	88	32	67	0	5	11	13	15	5	7	26	6	28	20	4	2	84	10	3	40	13	43	18	7	56	45	69	12	5	30	76	13
1711	4-Nov-21	9:55:00	1	0	1	0	CT	0	1	109	92	59	6	10	2	13	15	33	4	9	5	33	43	0	5	60	3	1	17	0	53	4	26	47	37	67	32	8	25	44	11
1712	4-Nov-21	10:00:00	1	0	1	0	CT	0	1	14	37	57	21	85	9	40	29	22	5	4	1	53	54	0	13	76	9	4	31	0	24	41	62	0	27	57	31	7	27	56	25
1713	4-Nov-21	10:05:00	1	0	1	0	CT	0	1	80	50	14	9	33	2	10	45	23	19	8	1	24	42	44	26	82	7	17	15	8	13	33	47	0	21	52	42	6	36	5	17
1714	4-Nov-21	10:10:00	1	0	1	0	CT	0	1	48	18	0	1	3	32	0	1	17	9	16	0	35	26	59	3	40	9	28	48	48	0	21	28	0	10	9	34	38	46	3	13
1715	4-Nov-21	10:15:00	1	0	1	0	CT	0	1	14	0	2	13	5	1	4	30	26	6	6	2	33	18	13	0	24	1	34	9	24	0	6	60	0	0	22	33	23	12	99	15
1716	4-Nov-21	10:20:00	1	0	1	0	CT	0	1	9	15	17	12	0	2	19	64	30	2	11	7	47	2	1	2	76	6	32	24	3	0	3	46	0	16	10	21	27	13	94	20
1717	4-Nov-21	10:25:00	1	0	1	0	CT	0	1	27	7	31	6	0	0	29	11	0	0	12	12	20	23	0	0	62	5	66	21	20	13	2	16	0	18	19	22	1	10	84	24
1718	4-Nov-21	10:30:00	1	0	1	0	CT	0	1	26	6	3	0	0	3	24	83	0	2	6	8	48	35	8	13	74	5	70	13	38	83	1	10	50	12	34	28	10	15	47	19
1719	4-Nov-21	10:35:00	1	0	1	0	CT	0	1	2	5	25	4	0	6	18	0	0	10	11	11	15	39	8	26	55	8	17	32	53	48	45	10	82	12	24	14	2	47	73	8
1720	4-Nov-21	10:40:00	1	0	1	0	CT	0	1	7	1	80	10	0	4	22	0	8	8	16	20	79	14	0	0	75	18	39	2	40	45	66	14	71	5	33	13	18	14	95	23
1721	4-Nov-21	10:45:00	1	0	1	0	CT	0	1	45	6	60	5	14	11	37	8	10	3	14	9	48	23	23	0	89	13	14	0	1	28	48	28	38	9	15	15	45	3	57	14
1722	4-Nov-21	10:50:00	1	0	1	0	CT	0	1	13	0	2	2	74	8	12	39	0	3	11	5	39	33	64	47	66	5	4	4	2	39	33	29	40	19	14	23	0	4	15	12
1723	4-Nov-21	10:55:00	1	0	1	0	CT	0	1	11	2	1	12	75	6	18	28	0	1	20	13	71	43	32	48	48	14	9	0	4	38	28	57	14	8	13	15	10	25	43	8
1724	4-Nov-21	11:00:00	1	0	1	0	CT	0	1	41	4	16	3	4	12	25	0	4	2	14	50	22	6	52	7	43	7	6	32	50	60	22	23	58	2	7	10	31	40	27	9
1725	4-Nov-21	11:05:00	1	0	1	0	CT	0	1	25	45	16	14	1	2	16	0	14	9	11	71	84	9	7	0	25	16	21	37	54	32	14	6	0	6	6	24	55	15	79	19
1726	4-Nov-21	11:10:00	1	0	1	0	CT	0	1	25	62	8	4	34	14	15	0	47	7	17	49	52	33	4	10	51	14	8	31	48	23	16	3	0	7	8	16	18	11	28	16
1727	4-Nov-21	11:15:00	1	0	1	0	CT	0	1	27	18	16	8	1	3	16	0	26	11	14	23	42	51	25	25	98	9	4	39	24	46	17	12	0	10	10	29	60	9	12	9
1728	4-Nov-21	11:20:00	1	0	1	0	CT	0	1	8	26	16	1	3	24	28	0	0	8	28	41	23	28	45	58	59	28	17	19	7	24	10	10	0	15	12	28	8	11	7	8
1729	4-Nov-21	11:25:00	1	0	1	0	CT	0	1	0	38	13	7	10	1	16	0	0	8	17	29	21	70	49	63	40	4	11	24	0	9	7	8	0	10	19	11	32	27	34	17
1730	4-Nov-21	11:30:00	1	0	1	0	CT	0	1	12	13	17	0	15	4	24	0	0	3	14	54	28	80	49	65	48	9	6	13	0	11	4	13	0	12	34	10	31	16	62	23
1731	4-Nov-21	11:35:00	1	0	1	0	CT	0	1	27	4	11	0	19	0	35	0	0	7	9	0	23	11	2	40	32	2	4	6	0	15	3	20	0	13	12	7	37	11	78	14
1732	4-Nov-21	11:40:00	1	0	1	0	CT	0	1	13	5	8	9	4	0	18	4	15	6	18	7	27	12	0	9	33	7	9	29	0	19	62	17	65	12	12	23	30	22	84	15
1733	4-Nov-21	11:45:00	1	0	1	0	CT	0	1	12	11	5	34	13	0	12	6	34	10	16	5	20	5	0	0	4	21	1	16	17	30	22	13	108	7	9	9	24	7	38	17
1734	4-Nov-21	11:50:00	1	0	1	0	CT	0	1	66	4	0	7	24	0	20	31	14	4	23	4	17	16	65	1	15	5	4	23	27	20	12	46	63	9	10	15	17	40	1	15
1735	4-Nov-21	11:55:00	1	0	1	0	CT	0	1	33	3	1	5	52	0	22	27	11	9	71	0	22	0	5	0	19	4	2	20	70	3	38	44	20	10	15	14	1	20	11	9
1736	4-Nov-21	12:00:00	1	0	1	0	CT	0	1	95	10	30	4	24	11	4	51	1	7	90	0	71	39	46	0	6	21	2	18	20	4	10	46	69	8	15	11	11	6	83	11
1737	4-Nov-21	12:05:00	1	0	1	0	CT	0	1	32	9	12	7	0	2	19	2	48	8	35	0	61	65	28	0	30	12	10	10	5	13	6	33	67	4	19	20	26	16	70	15
1738	4-Nov-21	12:10:00	1	0	1	0	CT	0	1	8	3	9	3	24	4	4	0	32	4	11	3	62	12	5	0	31	16	18	27	51	38	13	16	56	10	17	12	23	19	23	17
1739	4-Nov-21	12:15:00	1	0	1	0	CT	0	1	1	3	1	2	13	8	0	0	18	8	1	12	29	7	4	0	28	11	13	9	40	7	2	36	0	8	35	10	20	54	21	24
1740	4-Nov-21	12:20:00	1	0	1	0	CT	0	0	0	0	0	0	63	31	0	0	27	2	2	0	0	0	6	0	35	25	0	23	59	0	0	7	0	0	10	10	16	63	0	14
1741	4-Nov-21	12:25:00	1	0	1	0	CT	0	0	0	51	0	0	0	0	0	0	13	5	19	7	0	0	0	0	20	0	6	1	5	0	0	0	0	0	24	17	10	0	0	2
1742	4-Nov-21	12:30:00	1	0	1	0	CT	0	0	0	65	0	0	0	4	0	0	4	75	0	57	0	3	17	0	0	0	7	0	1	0	0	0	0	55	77	0	0	0	80	7
1743	4-Nov-21	12:35:00	1	0	1	0	CT	0	0	0	49	0	0	0	11	0	0	81	67	0	57	0	0	95	0	0	0	0	1	1	0	57	0	0	36	80	0	1	0	147	3
1744	4-Nov-21	12:40:00	1	0	1	0	CT	0	0	0	30	49	0	0	95	0	0	96	60	0	63	0	0	89	0	0	0	75	34	1	0	67	0	0	42	59	0	0	0	105	1
1745	4-Nov-21	12:45:00	1	0	1	0	CT	0	0	135	67	73	0	0	66	0	0	101	49	0	50	0	0	82	0	0	0	69	3	37	0	76	0	4	52	88	2	1	0	124	54
1746	4-Nov-21	12:50:00	1	0	1	0	CT	0	0	92	72	68	0	0	57	12	0	48	48	0	64	0	0	18	0	83	0	55	2	0	0	45	0	45	38	50	3	0	0	89	57
1747	4-Nov-21	12:55:00	1	0	1	0	CT	0	0	87	57	79	0	0	57	110	0	47	17	0	47	0	0	25	0	85	0	88	17	0	0	0	10	5	33	48	0	0	54	24	51
1748	4-Nov-21	13:00:00	1	0	1	0	CT	0	0	93	37	71	20	0	50	90	0	65	36	0	20	0	0	10	55	55	0	59	34	0	0	0	0	0	63	18	0	3	68	0	69
1749	4-Nov-21	13:05:00	1	0	1	0	CT	0	0	73	37	32	84	0	41	122	0	32	46	0	0	0	0	67	47	78	0	57	60	0	0	40	1	6	53	0	0	21	59	0	51
1750	4-Nov-21	13:10:00	1	0	1	0	CT	0	0	104	9	2	66	33	80	86	0	0	45	0	0	0	0	35	65	81	0	75	69	0	0	54	0	0	39	0	15	0	39	0	53
1751	4-Nov-21	13:15:00	1	0	1	0	CT	0	0	31	0	0	76	58	55	70	0	80	30	0	0	0	0	7	63	35	54	58	37	0	0	52	23	0	20	0	43	0	41	27	27
1752	4-Nov-21	13:20:00	1	0	1	0	CT	0	0	50	0	1	66	75	39	95	0	38	8	0	0	0	0	46	63	0	58	0	62	0	7	0	1	0	25	1	0	0	42	95	0
1753	4-Nov-21	13:25:00	1	0	1	0	CT	0	0	0	0	0	76	92	0	78	0	45	48	0	12	0	0	45	46	0	46	0	29	0	76	1	113	0	88	70	0	0	12	103	0
1754	4-Nov-21	13:30:00	1	0	1	0	CT	0	0	0	0	65	63	71	0	92	0	0	53	0	58	73	0	29	93	0	62	0	0	59	0	6	104	0	1	46	1	0	26	24	0
1755	4-Nov-21	13:35:00	1	0	1	0	CT	0	0	0	0	81	99	69	0	82	0	32	37	0	54	106	1	51	63	44	31	50	4	55	0	70	87	0	0	55	0	0	48	0	76
1756	4-Nov-21	13:40:00	1	0	1	0	CT	0	0	73	60	49	80	80	46	106	59	115	2	0	12	104	115	36	56	68	30	50	60	31	1	46	55	0	50	23	0	0	57	87	59
1757	4-Nov-21	13:45:00	1	0	1	0	CT	0	0	105	47	49	63	0	54	79	80	27	6	0	27	42	92	49	39	0	34	73	56	43	0	53	75	26	52	0	0	55	48	126	0
1758	4-Nov-21	13:50:00	1	0	1	0	CT	0	0	14	30	71	51	0	32	92	86	0	32	0	51	57	101	50	0	0	26	44	53	36	0	49	25	104	51	0	0	55	16	68	0
1759	4-Nov-21	13:55:00	1	0	1	0	CT	0	0	0	20	80	78	0	35	91	26	0	50	0	13	98	63	23	0	0	18	37	24	45	25	63	105	72	13	78	10	33	0	61	65
1760	4-Nov-21	14:00:00	1	0	1	0	CT	0	0	0	7	11	62	0	43	71	76	0	61	0	0	0	0	6	1	67	28	32	65	53	60	0	67	33	53	65	59	19	0	0	57
1761	4-Nov-21	14:05:00	1	0	1	0	CT	0	0	0	0	0	66	88	0	51	14	31	22	56	0	0	0	35	0	88	29	0	22	31	59	0	2	63	22	30	56	0	68	0	21
1762	4-Nov-21	14:10:00	1	0	1	0	CT	0	0	0	0	0	1	105	0	75	14	99	0	84	0	0	0	63	4	47	48	0	7	63	31	0	0	49	21	0	60	0	44	1	0
1763	4-Nov-21	14:15:00	1	0	1	0	CT	0	0	0	42	0	0	77	0	36	0	95	12	59	0	0	0	55	1	0	24	0	0	1	7	46	0	17	25	20	5	8	21	53	0
1764	4-Nov-21	14:20:00	1	0	1	0	CT	0	0	0	34	0	0	3	14	98	50	21	53	74	0	9	16	51	0	1	23	9	23	6	0	58	125	87	0	2	0	61	50	108	2
1765	4-Nov-21	14:25:00	1	0	1	0	CT	0	0	96	33	0	0	0	59	66	12	0	51	61	0	102	111	47	29	84	3	59	85	0	0	20	80	0	0	80	0	23	39	100	77
1766	4-Nov-21	14:30:00	1	0	1	0	CT	0	0	92	46	69	0	0	42	85	0	0	33	72	30	110	80	44	0	94	0	59	66	9	0	0	104	0	24	57	0	0	0	63	74
1767	4-Nov-21	14:35:00	1	0	1	0	CT	0	0	36	19	73	1	0	68	79	0	0	19	98	69	79	70	36	23	73	0	18	38	53	0	0	48	64	46	1	0	0	3	33	45
1768	4-Nov-21	14:40:00	1	0	1	0	CT	0	0	0	7	0	34	3	44	2	0	80	5	79	52	81	23	8	4	4	8	10	32	42	0	0	0	49	21	0	47	0	35	17	0
1769	4-Nov-21	14:45:00	1	0	1	0	CT	0	0	0	0	0	62	89	4	0	52	84	0	53	44	92	121	0	29	13	64	0	2	44	17	21	0	0	54	2	54	0	54	110	0
1770	4-Nov-21	14:50:00	1	0	1	0	CT	0	0	0	0	0	59	109	0	0	53	50	32	48	9	43	34	31	37	78	46	43	0	22	39	64	0	0	15	70	41	0	52	101	22
1771	4-Nov-21	14:55:00	1	0	1	0	CT	0	0	27	0	0	47	0	0	0	48	33	72	0	4	52	31	47	0	80	49	51	14	30	34	30	9	0	0	0	0	0	48	56	62
1772	4-Nov-21	15:00:00	1	0	1	0	CT	0	0	95	0	1	29	0	12	0	0	77	0	0	52	6	0	48	0	61	46	52	90	33	19	56	81	0	14	0	0	0	14	0	54
1773	4-Nov-21	15:05:00	1	0	1	0	CT	0	0	73	0	78	57	0	60	0	14	37	33	0	44	0	0	15	0	56	12	33	41	12	38	55	71	0	63	51	0	0	0	0	0
1774	4-Nov-21	15:10:00	1	0	1	0	CT	0	0	68	15	78	10	0	54	0	6	0	24	42	51	0	0	49	34	1	56	67	59	0	0	16	77	0	52	66	0	17	2	121	0
1775	4-Nov-21	15:15:00	1	0	1	0	CT	0	0	0	58	0	14	0	56	0	2	0	22	82	15	4	0	44	3	0	37	34	19	0	23	0	66	0	68	54	0	53	38	83	65
1776	4-Nov-21	15:20:00	1	0	1	0	CT	0	0	0	42	41	38	94	13	0	3	0	28	27	0	45	94	0	31	73	30	0	46	0	54	0	0	41	23	8	1	54	40	60	56
1777	4-Nov-21	15:25:00	1	0	1	0	CT	0	0	0	26	74	0	107	0	0	1	65	36	59	0	94	47	33	30	68	56	29	0	0	14	0	0	79	0	0	63	30	27	0	0
1778	4-Nov-21	15:30:00	1	0	1	0	CT	0	0	32	50	32	0	90	0	68	0	77	34	41	0	86	66	45	12	46	65	54	7	32	0	0	4	55	0	0	73	1	16	18	59
1779	4-Nov-21	15:35:00	1	0	1	0	CT	0	0	91	20	0	56	14	34	80	2	0	30	30	0	83	23	1	9	34	35	37	71	54	0	46	55	35	41	0	47	0	0	118	60
1780	4-Nov-21	15:40:00	1	0	1	0	CT	0	0	69	2	1	77	1	41	65	1	0	36	0	0	63	0	7	74	0	40	30	77	41	0	65	76	69	30	33	57	7	21	112	53
1781	4-Nov-21	15:45:00	1	0	1	0	CT	0	0	88	0	53	64	0	33	50	83	75	39	1	19	51	0	39	63	8	62	52	46	47	32	56	77	74	0	82	48	55	50	107	1
1782	4-Nov-21	15:50:00	1	0	1	0	CT	0	0	94	0	67	58	3	69	56	92	101	11	29	62	4	5	52	63	92	15	47	15	26	29	27	90	90	20	38	5	2	4	0	0
1783	4-Nov-21	15:55:00	1	0	1	0	CT	0	0	51	0	23	49	1	28	58	60	100	4	0	64	0	60	40	48	21	25	38	38	10	50	0	43	72	26	0	23	0	2	0	54
1784	4-Nov-21	16:00:00	1	0	1	0	CT	0	0	88	0	1	56	88	55	73	83	95	21	0	39	0	89	10	47	34	44	2	41	38	71	23	0	61	54	0	1	15	41	0	59
1785	4-Nov-21	16:05:00	1	0	1	0	CT	0	0	14	0	86	24	103	1	73	70	69	37	0	19	73	103	1	0	59	39	58	55	37	4	71	49	1	39	0	0	45	72	0	62
1786	4-Nov-21	16:10:00	1	0	1	0	CT	0	0	0	0	70	71	19	0	22	41	0	22	0	38	45	42	35	50	60	15	53	42	35	29	30	56	9	12	55	1	22	37	118	66
1787	4-Nov-21	16:15:00	1	0	1	0	CT	0	0	0	64	6	71	0	63	0	44	0	37	0	54	94	0	9	41	29	43	50	9	22	71	47	77	5	47	77	30	0	26	101	50
1788	4-Nov-21	16:20:00	1	0	1	0	CT	0	0	33	80	0	51	0	48	0	20	21	33	0	33	5	0	42	3	66	51	42	9	40	28	42	59	22	21	67	67	0	34	115	40
1789	4-Nov-21	16:25:00	1	0	1	0	CT	0	0	103	23	0	19	18	57	0	29	61	19	98	3	62	33	45	5	86	53	35	66	0	25	26	91	11	38	0	57	0	19	98	0
1790	4-Nov-21	16:30:00	1	0	1	0	CT	0	0	100	32	0	0	105	34	68	1	93	40	76	50	0	68	44	30	104	82	24	69	0	14	44	82	0	48	28	53	0	34	138	0
1791	4-Nov-21	16:35:00	1	0	1	0	CT	0	0	88	72	0	0	80	24	76	41	9	44	71	41	0	61	39	0	44	32	63	75	0	6	46	86	0	16	82	56	48	31	110	82
1792	4-Nov-21	16:40:00	1	0	1	0	CT	0	0	78	63	52	28	44	31	86	63	0	38	84	48	0	62	21	10	69	26	47	39	0	0	48	26	0	4	60	11	50	2	104	71
1793	4-Nov-21	16:45:00	1	0	1	0	CT	0	0	88	29	63	64	131	0	126	32	0	28	65	36	0	63	42	2	69	42	75	36	0	7	0	107	21	50	58	0	35	47	10	74
1794	4-Nov-21	16:50:00	1	0	1	0	CT	0	0	78	0	45	55	80	0	63	2	0	49	76	18	0	64	62	0	7	42	53	64	0	48	0	53	98	41	12	0	0	33	104	53
1795	4-Nov-21	16:55:00	1	0	1	0	CT	0	0	88	0	78	46	97	35	61	0	112	21	77	0	0	68	38	0	0	0	19	30	1	26	0	32	83	50	68	0	0	20	116	56
1796	4-Nov-21	17:00:00	1	0	1	0	CT	0	0	89	0	68	56	106	52	72	5	103	40	89	0	0	95	17	46	0	0	47	47	52	46	0	84	51	75	27	0	1	50	99	62
1797	4-Nov-21	17:05:00	1	0	1	0	CT	0	0	90	0	83	51	30	50	56	6	92	35	84	0	2	12	48	19	50	0	45	41	65	40	0	0	75	34	4	21	1	20	120	49
1798	4-Nov-21	17:10:00	1	0	1	0	CT	0	0	101	0	72	43	0	43	89	1	1	29	55	0	0	103	42	0	64	81	5	82	39	20	0	0	26	40	4	75	0	20	94	65
1799	4-Nov-21	17:15:00	1	0	1	0	CT	0	0	112	0	80	59	20	40	82	1	0	30	1	0	0	46	5	15	0	51	57	47	40	31	0	0	124	6	1	44	0	43	63	62
1800	4-Nov-21	17:20:00	1	0	1	0	CT	0	0	92	36	56	65	98	3	33	63	42	22	0	0	31	93	0	39	0	58	22	25	39	4	0	0	23	0	5	44	1	20	13	59
1801	4-Nov-21	17:25:00	1	0	1	0	CT	0	0	87	26	66	25	71	0	2	17	82	35	0	0	115	29	1	49	0	18	0	27	37	37	0	0	36	0	73	58	13	37	110	41
1802	4-Nov-21	17:30:00	1	0	1	0	CT	0	0	80	47	43	0	45	0	0	111	66	39	0	0	69	31	33	45	0	26	29	60	48	32	0	71	9	0	55	70	0	41	7	97
1803	4-Nov-21	17:35:00	1	0	1	0	CT	0	0	4	32	26	0	91	0	0	63	7	30	0	0	65	0	20	63	0	63	37	47	40	25	0	65	63	0	41	50	0	18	0	58
1804	4-Nov-21	17:40:00	1	0	1	0	CT	0	0	19	0	97	0	40	0	0	63	0	33	0	0	124	0	45	63	0	0	0	37	63	0	0	91	6	0	29	1	0	0	0	69
1805	4-Nov-21	17:45:00	1	0	1	0	CT	0	0	58	0	16	0	1	0	0	29	1	31	0	0	71	0	22	63	0	0	2	31	0	0	0	34	0	0	60	63	0	44	0	53
1806	4-Nov-21	17:50:00	1	0	1	0	CT	0	0	1	0	0	0	0	0	0	63	1	33	0	52	50	72	0	38	0	0	63	55	0	58	0	0	0	0	79	10	0	37	0	55
1807	4-Nov-21	17:55:00	1	0	1	0	CT	0	0	0	0	0	0	112	0	0	26	86	31	0	45	0	78	0	46	0	0	64	22	0	33	0	0	0	0	21	0	0	20	0	76
1808	4-Nov-21	18:00:00	1	0	1	0	CT	0	0	0	0	0	0	65	0	0	0	60	7	0	52	0	67	1	31	0	0	9	67	0	39	0	0	0	0	21	0	0	0	0	37
1809	4-Nov-21	18:05:00	1	0	1	0	CT	0	0	0	0	0	0	49	0	0	0	19	0	0	24	0	44	15	1	0	0	0	24	0	0	0	0	0	0	10	0	0	0	0	50
1810	4-Nov-21	18:10:00	1	0	1	0	CT	0	0	0	0	0	5	80	0	0	0	0	0	0	58	0	0	69	4	0	16	0	2	0	47	9	0	0	0	1	0	0	5	0	0
1811	4-Nov-21	18:15:00	1	0	1	0	CT	0	0	0	0	0	0	0	0	0	0	0	0	0	0	0	0	32	0	0	59	0	0	0	38	0	0	0	36	0	0	0	26	0	0
1812	4-Nov-21	18:20:00	1	0	1	0	CT	0	0	0	0	0	0	0	59	0	0	0	0	0	0	0	0	0	0	0	38	0	0	0	1	0	0	0	43	0	0	0	35	0	24
1813	4-Nov-21	18:25:00	1	0	1	0	CT	0	0	4	0	0	0	0	63	0	0	0	0	0	0	0	35	0	0	0	63	0	1	0	0	0	0	0	63	2	0	0	3	0	77
1814	4-Nov-21	18:30:00	1	0	1	0	CT	0	0	0	0	0	0	0	24	0	0	0	0	0	0	0	65	0	0	0	2	0	0	0	0	0	0	0	17	3	0	0	0	0	62
1815	4-Nov-21	18:35:00	1	0	1	0	CT	0	0	0	0	0	0	0	0	0	0	0	0	0	0	0	71	44	8	0	0	0	0	0	0	0	0	0	0	4	0	0	0	0	48
1816	4-Nov-21	18:40:00	1	0	1	0	CT	0	0	0	0	0	0	0	0	0	0	0	0	0	0	28	3	23	0	0	0	0	0	0	0	0	0	0	0	47	0	0	17	0	16
1817	4-Nov-21	18:45:00	1	0	1	0	CT	0	0	0	0	0	38	0	0	0	0	0	0	0	0	85	1	55	0	0	0	0	0	0	0	0	0	0	0	112	0	0	35	0	0
1818	4-Nov-21	18:50:00	1	0	1	0	CT	0	0	0	0	0	75	0	0	0	0	0	0	0	0	91	0	1	0	0	0	0	0	21	23	0	0	0	0	82	0	0	19	0	0
1819	4-Nov-21	18:55:00	1	0	1	0	CT	0	0	0	0	0	15	0	0	0	0	0	0	0	0	52	1	0	0	0	0	0	0	56	58	0	0	0	0	24	0	0	0	0	0
1820	4-Nov-21	19:00:00	1	0	1	0	CT	0	0	0	0	0	0	56	1	0	0	0	0	0	0	0	0	0	0	5	0	0	0	49	27	0	0	0	0	19	0	0	0	0	0
1821	4-Nov-21	19:05:00	1	0	1	0	CT	0	0	0	0	0	0	116	0	0	0	0	0	0	0	0	1	12	0	18	0	0	1	11	9	0	0	0	0	0	18	0	0	0	0
1822	4-Nov-21	19:10:00	1	0	1	0	CT	0	0	0	0	0	0	43	0	0	0	0	0	0	0	0	0	1	1	0	0	0	5	37	0	0	0	0	0	0	16	0	0	0	0
1823	4-Nov-21	19:15:00	1	0	1	0	CT	0	0	0	0	0	0	13	7	0	0	0	0	0	0	0	0	0	0	0	0	0	1	0	0	0	0	0	0	0	0	0	0	0	0
1824	4-Nov-21	19:20:00	1	0	1	0	CT	0	0	0	0	0	0	16	81	0	0	0	0	0	0	0	4	9	0	0	0	0	5	0	0	0	0	0	0	0	0	0	0	0	0
1825	4-Nov-21	19:25:00	1	0	1	0	CT	0	0	0	0	0	0	0	39	0	0	0	0	0	0	0	64	61	0	0	0	0	0	0	0	0	0	0	0	0	0	0	17	0	0
1826	4-Nov-21	19:30:00	1	0	1	0	CT	0	0	1	1	0	0	0	33	0	0	0	0	0	0	0	91	0	0	0	0	0	0	0	0	0	0	0	0	0	0	0	38	0	73
1827	4-Nov-21	19:35:00	1	0	1	0	CT	0	0	0	0	0	0	0	0	0	0	0	0	0	0	0	83	0	0	0	0	0	0	0	0	0	0	0	0	0	0	0	54	0	13
1828	4-Nov-21	19:40:00	1	0	1	0	CT	0	0	14	0	0	0	0	0	0	0	0	0	0	0	0	0	0	0	0	0	0	2	0	3	0	1	0	0	0	0	0	0	0	0
1829	4-Nov-21	19:45:00	1	0	1	0	CT	0	0	0	0	0	0	0	0	0	0	0	0	0	0	0	0	0	0	0	0	0	2	0	65	0	0	0	63	0	0	0	0	0	0
1830	4-Nov-21	19:50:00	1	0	1	0	CT	0	0	0	0	0	0	0	0	0	0	0	0	0	0	0	0	2	0	0	0	0	2	0	0	0	0	0	0	1	0	0	0	0	0
1831	4-Nov-21	19:55:00	1	0	1	0	CT	0	0	0	0	0	0	0	0	0	0	0	0	1	0	0	0	0	0	0	0	0	51	1	0	0	0	0	0	0	0	0	0	0	0
1832	4-Nov-21	20:00:00	1	0	1	0	CT	0	0	0	5	0	0	0	0	0	1	0	0	0	0	0	0	0	0	3	3	0	71	0	0	0	0	0	0	0	0	0	0	0	0
1833	4-Nov-21	20:05:00	1	0	1	0	CT	0	0	0	76	1	0	0	0	0	88	0	0	0	0	0	0	0	0	7	0	0	66	0	0	0	0	0	0	0	0	0	0	0	0
1834	4-Nov-21	20:10:00	1	0	1	0	CT	0	0	0	57	1	0	0	0	1	63	0	0	0	0	0	0	0	0	0	0	0	34	1	0	0	0	0	0	0	0	0	0	0	0
1835	4-Nov-21	20:15:00	1	0	1	0	CT	0	1	59	43	1	82	2	2	35	36	49	26	40	2	28	5	39	16	57	22	20	24	18	8	35	20	42	40	10	78	23	27	56	17
1836	4-Nov-21	20:20:00	1	0	1	0	CT	0	1	0	0	0	67	58	0	0	87	54	10	15	57	1	23	49	70	61	5	22	0	17	0	0	32	59	0	0	55	5	16	35	35
1837	4-Nov-21	20:25:00	1	0	1	0	CT	0	1	18	0	7	54	47	0	0	0	10	13	13	65	0	4	40	8	13	0	0	11	0	6	0	0	51	0	0	6	0	2	0	1
1838	4-Nov-21	20:30:00	1	0	1	0	CT	0	1	68	0	0	34	73	20	0	0	39	63	27	23	0	0	50	20	82	0	0	22	10	69	50	0	42	0	5	26	14	13	1	79
1839	4-Nov-21	20:35:00	1	0	1	0	CT	0	1	103	13	0	43	78	41	0	37	32	88	98	38	0	0	98	38	87	10	0	13	50	71	85	5	110	7	2	21	0	71	0	36
1840	4-Nov-21	20:40:00	1	0	1	0	CT	0	1	90	1	0	32	0	51	0	48	0	23	89	37	0	44	57	63	51	0	19	0	77	46	37	81	35	27	3	22	0	40	85	42
1841	4-Nov-21	20:45:00	1	0	1	0	CT	0	1	22	5	1	78	48	56	20	59	88	33	94	48	0	69	52	35	89	18	92	11	61	7	61	60	94	15	57	69	0	23	123	44
1842	4-Nov-21	20:50:00	1	0	1	0	CT	0	1	24	79	16	35	106	32	21	0	84	0	114	55	46	94	70	0	86	8	71	48	48	62	14	38	88	0	83	73	14	46	122	53
1843	4-Nov-21	20:55:00	1	0	1	0	CT	0	1	93	58	88	66	110	26	80	34	0	36	80	27	48	14	41	36	53	13	101	52	42	58	1	7	71	2	42	22	56	45	82	2
1844	4-Nov-21	21:00:00	1	0	1	0	CT	0	1	100	55	81	74	56	26	86	16	0	52	79	33	28	0	31	23	62	38	84	32	83	22	64	5	66	2	7	8	50	29	72	120
1845	4-Nov-21	21:05:00	1	0	1	0	CT	0	1	94	27	65	28	49	55	53	49	62	35	67	40	21	48	41	0	54	7	62	0	42	0	68	77	62	0	2	26	55	20	64	33
1846	4-Nov-21	21:10:00	1	0	1	0	CT	0	1	68	57	34	82	15	42	0	16	45	5	94	42	0	56	79	32	98	0	66	4	63	30	79	77	63	0	64	18	50	46	83	26
1847	4-Nov-21	21:15:00	1	0	1	0	CT	0	1	16	84	0	83	42	26	0	1	103	32	64	12	98	53	46	17	54	0	45	71	72	74	44	57	63	29	69	33	23	43	85	38
1848	4-Nov-21	21:20:00	1	0	1	0	CT	0	1	1	81	57	51	102	1	0	61	80	0	99	44	65	18	51	63	47	43	56	62	61	52	79	24	39	7	32	13	43	8	11	78
1849	4-Nov-21	21:25:00	1	0	1	0	CT	0	1	91	45	60	60	92	13	35	66	0	0	58	33	79	0	16	26	100	21	39	25	57	28	36	51	11	33	0	13	40	32	49	43
1850	4-Nov-21	21:30:00	1	0	1	0	CT	0	1	72	36	0	78	83	56	90	68	0	46	6	77	42	0	65	48	55	0	52	2	10	33	41	35	0	37	2	9	0	74	84	68
1851	4-Nov-21	21:35:00	1	0	1	0	CT	0	1	29	34	0	57	27	9	56	68	0	34	0	23	48	2	80	56	72	20	28	32	0	0	90	2	0	58	84	0	20	20	74	51
1852	4-Nov-21	21:40:00	1	0	1	0	CT	0	1	0	37	0	39	61	0	79	50	77	22	89	8	4	41	25	54	33	0	77	27	0	9	10	1	0	42	93	4	59	0	75	2
1853	4-Nov-21	21:45:00	1	0	1	0	CT	0	1	101	26	0	34	0	24	78	41	91	25	100	19	0	0	23	29	22	0	54	2	59	40	100	0	0	6	3	90	55	0	96	39
1854	4-Nov-21	21:50:00	1	0	1	0	CT	0	1	56	21	57	59	12	0	97	27	3	0	72	44	14	1	11	15	13	0	32	57	60	28	67	1	0	50	0	59	0	47	46	6
1855	4-Nov-21	21:55:00	1	0	1	0	CT	0	1	21	3	49	39	82	0	19	0	26	0	24	31	2	49	49	39	74	0	0	36	4	1	5	54	22	9	4	64	0	35	0	50
1856	4-Nov-21	22:00:00	1	0	1	0	CT	0	1	0	18	0	49	4	10	0	6	89	0	0	1	2	29	58	57	38	2	0	40	56	0	0	20	92	0	60	68	0	44	53	24
1857	4-Nov-21	22:05:00	1	0	1	0	CT	0	1	36	67	0	29	50	27	0	67	10	0	0	23	2	9	75	66	59	45	58	15	0	0	15	0	55	0	55	10	0	2	87	0
1858	4-Nov-21	22:10:00	1	0	1	0	CT	0	1	91	18	0	91	23	15	1	26	22	0	0	38	75	47	42	36	29	19	17	1	0	0	80	0	70	0	5	18	0	0	18	38
1859	4-Nov-21	22:15:00	1	0	1	0	CT	0	1	48	41	17	36	47	23	55	63	59	0	2	42	40	38	28	20	55	1	70	2	42	0	74	56	73	67	5	15	47	0	0	26
1860	4-Nov-21	22:20:00	1	0	1	0	CT	0	1	0	31	67	43	8	0	33	73	6	73	93	39	1	0	28	28	1	0	5	6	56	12	23	36	51	88	0	29	42	40	45	36
1861	4-Nov-21	22:25:00	1	0	1	0	CT	0	1	0	45	2	55	3	11	86	96	27	5	80	35	30	61	59	8	0	0	48	38	0	45	12	4	75	29	2	11	34	57	113	0
1862	4-Nov-21	22:30:00	1	0	1	0	CT	0	1	0	32	3	38	24	24	0	71	77	0	27	28	0	24	3	0	27	0	69	35	1	30	67	46	94	65	4	14	34	40	56	14
1863	4-Nov-21	22:35:00	1	0	1	0	CT	0	1	1	40	75	63	47	0	0	36	0	0	0	68	0	0	23	0	63	0	71	5	63	38	41	42	44	54	0	26	17	43	66	55
1864	4-Nov-21	22:40:00	1	0	1	0	CT	0	1	0	0	22	66	0	0	2	63	0	0	0	20	0	0	0	0	68	10	55	0	96	22	30	6	68	28	13	72	17	34	43	35
1865	4-Nov-21	22:45:00	1	0	1	0	CT	0	1	87	0	0	53	1	0	40	64	0	0	0	28	0	0	3	0	74	21	59	0	13	0	46	2	32	0	115	48	32	0	60	0
1866	4-Nov-21	22:50:00	1	0	1	0	CT	0	1	90	40	0	41	65	0	79	110	0	3	0	7	31	0	54	23	57	33	25	0	4	0	9	0	22	0	52	0	18	0	90	21
1867	4-Nov-21	22:55:00	1	0	1	0	CT	0	1	8	30	0	21	68	21	48	3	0	51	0	0	37	53	51	7	16	8	9	0	0	0	0	23	12	1	2	19	16	23	45	2
1868	4-Nov-21	23:00:00	1	0	1	0	CT	0	1	71	0	0	45	54	5	0	21	0	3	0	0	30	49	54	2	78	2	0	0	0	0	8	0	61	37	7	29	0	31	64	0
1869	4-Nov-21	23:05:00	1	0	1	0	CT	0	1	33	27	0	50	19	0	2	9	47	0	51	0	0	24	14	24	0	13	7	4	33	0	48	0	63	30	5	14	25	30	56	0
1870	4-Nov-21	23:10:00	1	0	1	0	CT	0	1	0	32	0	24	70	0	13	71	82	0	84	34	0	15	0	17	0	16	5	108	37	0	37	2	10	23	5	13	27	44	69	33
1871	4-Nov-21	23:15:00	1	0	1	0	CT	0	1	1	76	0	19	21	0	9	8	53	0	38	31	5	30	0	39	0	18	1	63	32	0	13	0	0	14	0	26	5	27	73	48
1872	4-Nov-21	23:20:00	1	0	1	0	CT	0	1	0	40	0	61	0	2	34	0	0	0	69	2	3	35	0	30	12	8	0	14	0	0	9	0	0	8	1	21	0	37	6	2
1873	4-Nov-21	23:25:00	1	0	1	0	CT	0	1	0	1	1	19	0	74	36	22	0	0	80	16	11	32	63	21	97	12	13	52	0	2	19	11	1	0	8	31	0	10	91	0
1874	4-Nov-21	23:30:00	1	0	1	0	CT	0	1	12	0	0	26	0	11	14	27	0	63	29	27	65	34	71	0	56	8	67	80	0	60	2	17	0	0	13	15	1	0	79	0
1875	4-Nov-21	23:35:00	1	0	1	0	CT	0	1	0	0	0	2	0	0	6	64	0	29	0	41	60	22	35	2	13	10	37	15	0	73	9	9	0	5	11	19	0	0	23	0
1876	4-Nov-21	23:40:00	1	0	1	0	CT	0	1	2	0	0	14	0	0	4	22	23	4	0	19	66	34	37	0	0	11	0	6	0	39	1	9	87	32	78	5	0	8	4	0
1877	4-Nov-21	23:45:00	1	0	1	0	CT	0	1	3	0	0	42	2	0	2	0	46	0	0	0	37	19	42	12	0	5	1	42	0	11	16	11	63	4	78	35	0	55	31	65
1878	4-Nov-21	23:50:00	1	0	1	0	CT	0	1	99	0	51	8	0	0	4	42	72	0	11	0	44	54	1	9	13	16	0	27	0	40	64	8	24	16	60	26	0	38	99	23
1879	4-Nov-21	23:55:00	1	0	1	0	CT	0	1	101	0	76	35	0	0	28	71	0	0	12	0	29	42	0	0	4	6	3	4	22	16	22	9	35	9	51	35	9	20	75	14
1880	5-Nov-21	0:00:00	1	0	1	0	CT	0	1	84	0	0	24	20	0	14	42	0	0	53	0	7	41	0	15	0	10	0	2	49	33	68	11	32	0	17	57	76	45	51	2
1881	5-Nov-21	0:05:00	1	0	1	0	CT	0	1	5	0	0	6	98	0	8	38	0	0	106	0	52	25	0	19	5	8	0	4	31	12	34	13	62	3	5	13	51	28	64	0
1882	5-Nov-21	0:10:00	1	0	1	0	CT	0	1	0	34	0	18	22	0	9	0	0	0	40	17	67	60	0	20	13	22	0	53	15	0	8	9	37	37	12	13	41	2	55	0
1883	5-Nov-21	0:15:00	1	0	1	0	CT	0	1	5	70	0	0	2	38	11	0	0	4	7	27	25	28	0	0	0	11	0	17	36	4	15	3	23	28	34	34	23	1	93	0
1884	5-Nov-21	0:20:00	1	0	1	0	CT	0	1	37	60	0	0	3	5	2	0	0	0	7	18	52	14	43	0	0	29	0	46	14	13	59	1	21	13	14	60	32	67	67	0
1885	5-Nov-21	0:25:00	1	0	1	0	CT	0	1	1	8	0	0	0	0	18	0	0	0	8	0	47	14	53	0	4	10	0	60	65	0	35	0	14	14	18	9	44	39	94	3
1886	5-Nov-21	0:30:00	1	0	1	0	CT	0	1	0	0	0	2	15	0	15	0	0	0	1	0	27	32	22	0	51	3	10	38	4	0	29	0	11	45	9	28	2	34	76	1
1887	5-Nov-21	0:35:00	1	0	1	0	CT	0	1	0	39	45	1	0	0	13	0	0	0	11	1	42	55	14	0	74	3	47	32	25	0	28	15	3	12	6	23	49	30	66	3
1888	5-Nov-21	0:40:00	1	0	1	0	CT	0	1	0	45	71	3	1	19	0	0	0	20	10	0	32	65	20	0	39	16	36	13	33	1	20	18	4	29	14	54	24	14	82	2
1889	5-Nov-21	0:45:00	1	0	1	0	CT	0	1	12	8	33	77	0	2	0	7	19	4	5	0	29	38	29	0	50	14	9	15	14	58	29	68	84	26	2	23	45	62	12	5
1890	5-Nov-21	0:50:00	1	0	1	0	CT	0	1	11	0	3	21	0	0	14	32	81	56	9	0	36	29	20	0	20	5	1	29	20	28	17	70	38	42	15	37	9	4	48	26
1891	5-Nov-21	0:55:00	1	0	1	0	CT	0	1	0	0	32	3	0	0	42	0	34	6	6	0	70	34	31	3	40	0	13	2	39	0	7	64	6	26	13	23	30	37	19	26
1892	5-Nov-21	1:00:00	1	0	1	0	CT	0	1	0	0	62	0	9	1	5	26	4	0	1	0	73	60	30	17	1	0	9	11	4	34	7	42	83	7	12	22	26	32	82	23
1893	5-Nov-21	1:05:00	1	0	1	0	CT	0	1	4	0	42	0	0	0	18	19	0	0	12	0	25	33	29	33	9	5	9	12	1	25	23	9	63	39	9	24	19	27	52	0
1894	5-Nov-21	1:10:00	1	0	1	0	CT	0	1	0	0	26	0	0	19	26	0	0	0	43	16	29	34	15	30	3	15	4	29	0	12	18	18	23	31	19	33	0	18	51	3
1895	5-Nov-21	1:15:00	1	0	1	0	CT	0	1	0	0	5	0	0	1	31	3	0	0	11	37	49	50	33	55	0	15	11	5	0	0	33	11	0	18	11	23	4	26	56	14
1896	5-Nov-21	1:20:00	1	0	1	0	CT	0	1	63	54	12	0	0	2	38	11	0	0	91	1	31	33	45	3	41	13	6	0	0	42	47	16	73	20	62	47	9	32	93	7
1897	5-Nov-21	1:25:00	1	0	1	0	CT	0	1	106	61	25	51	54	0	15	2	0	1	52	3	39	17	1	0	63	4	4	2	0	16	34	14	47	12	94	26	42	12	52	30
1898	5-Nov-21	1:30:00	1	0	1	0	CT	0	1	76	3	16	44	83	0	12	6	0	0	59	0	17	23	0	4	51	9	4	0	3	5	9	40	48	11	76	30	47	29	67	39
1899	5-Nov-21	1:35:00	1	0	1	0	CT	0	1	36	1	42	2	68	0	27	37	0	0	3	0	37	14	1	4	12	35	20	2	48	52	13	45	20	5	16	29	26	27	51	42
1900	5-Nov-21	1:40:00	1	0	1	0	CT	0	1	91	2	56	0	32	36	19	11	0	0	10	0	30	25	1	4	10	26	3	8	21	29	56	13	70	7	4	33	6	52	54	10
1901	5-Nov-21	1:45:00	1	0	1	0	CT	0	1	99	7	16	2	5	13	10	28	0	0	2	0	25	25	7	27	63	10	1	31	3	1	39	7	18	5	11	48	15	10	72	30
1902	5-Nov-21	1:50:00	1	0	1	0	CT	0	1	9	61	3	0	0	10	22	0	0	0	7	0	26	40	6	3	63	24	0	43	0	23	32	6	23	8	19	41	48	5	54	7
1903	5-Nov-21	1:55:00	1	0	1	0	CT	0	1	26	26	0	0	0	3	4	3	64	0	5	0	17	8	43	18	97	17	0	17	61	19	56	19	12	7	18	9	20	19	38	9
1904	5-Nov-21	2:00:00	1	0	1	0	CT	0	1	41	48	29	1	0	1	12	2	74	0	9	2	0	28	27	29	31	12	1	36	30	0	23	18	89	21	19	47	20	13	65	35
1905	5-Nov-21	2:05:00	1	0	1	0	CT	0	1	15	6	14	15	0	0	21	0	25	2	4	13	0	32	34	0	57	6	11	26	40	13	28	26	76	78	41	12	42	3	68	14
1906	5-Nov-21	2:10:00	1	0	1	0	CT	0	1	43	0	11	53	0	21	17	0	0	0	5	43	16	13	15	0	21	13	1	21	3	13	36	22	63	23	77	37	20	35	69	15
1907	5-Nov-21	2:15:00	1	0	1	0	CT	0	1	12	0	1	31	0	0	20	0	0	0	10	24	64	6	26	0	20	10	7	9	14	57	45	39	63	30	69	26	45	13	82	5
1908	5-Nov-21	2:20:00	1	0	1	0	CT	0	1	58	0	0	24	0	0	23	0	0	0	0	14	46	0	19	0	1	9	3	24	34	0	21	43	12	8	55	20	0	34	89	2
1909	5-Nov-21	2:25:00	1	0	1	0	CT	0	1	30	0	2	7	16	0	23	0	0	0	34	5	39	18	16	8	1	6	33	25	37	0	21	20	0	18	39	50	6	30	51	2
1910	5-Nov-21	2:30:00	1	0	1	0	CT	0	1	26	0	15	0	13	0	18	0	0	0	8	6	41	42	2	0	20	15	31	0	24	26	12	16	4	31	46	36	44	26	4	0
1911	5-Nov-21	2:35:00	1	0	1	0	CT	0	1	7	0	29	2	32	0	19	0	0	0	17	6	57	18	3	0	53	5	44	26	3	29	45	12	10	13	99	20	28	24	59	26
1912	5-Nov-21	2:40:00	1	0	1	0	CT	0	1	39	0	7	1	30	0	29	27	0	3	15	0	20	17	14	0	54	12	43	23	63	39	70	21	78	12	5	6	52	25	54	0
1913	5-Nov-21	2:45:00	1	0	1	0	CT	0	1	85	0	24	13	54	0	10	41	0	5	57	4	21	18	31	4	58	10	11	20	65	14	53	5	37	14	13	7	53	29	70	3
1914	5-Nov-21	2:50:00	1	0	1	0	CT	0	1	87	0	14	5	0	0	11	51	0	20	34	7	40	18	28	16	58	37	38	18	2	47	19	11	32	32	19	21	20	29	94	0
1915	5-Nov-21	2:55:00	1	0	1	0	CT	0	1	8	0	23	3	23	11	14	104	0	6	41	1	34	34	27	46	10	17	8	40	22	34	21	10	19	34	14	23	17	30	74	0
1916	5-Nov-21	3:00:00	1	0	1	0	CT	0	1	23	7	16	1	31	4	21	33	0	1	17	1	25	26	26	79	24	20	37	2	36	38	29	47	50	5	8	41	32	28	51	0
1917	5-Nov-21	3:05:00	1	0	1	0	CT	0	1	9	48	14	0	18	5	3	41	0	1	0	1	63	21	38	34	71	11	28	6	34	22	18	68	3	10	6	36	47	19	28	0
1918	5-Nov-21	3:10:00	1	0	1	0	CT	0	1	0	10	14	5	42	17	9	24	0	0	0	0	18	27	23	58	8	15	5	30	16	61	1	37	0	17	42	27	20	8	20	0
1919	5-Nov-21	3:15:00	1	0	1	0	CT	0	1	3	11	11	7	12	10	22	7	0	0	2	2	29	43	10	27	0	7	9	17	20	16	4	33	0	23	80	19	50	18	53	7
1920	5-Nov-21	3:20:00	1	0	1	0	CT	0	1	27	27	13	5	22	7	2	0	0	0	11	3	55	10	3	6	0	8	7	31	5	19	54	57	0	12	14	11	32	25	16	50
1921	5-Nov-21	3:25:00	1	0	1	0	CT	0	1	30	3	7	70	14	0	0	0	0	0	7	29	51	21	11	0	0	20	3	26	19	29	39	13	0	81	77	10	0	37	40	61
1922	5-Nov-21	3:30:00	1	0	1	0	CT	0	1	30	13	13	34	19	1	31	0	44	0	7	55	14	0	8	3	0	12	29	0	23	7	31	22	52	15	53	9	6	40	46	31
1923	5-Nov-21	3:35:00	1	0	1	0	CT	0	1	100	8	15	7	0	0	28	0	57	0	15	33	18	9	19	7	0	16	3	12	56	63	18	31	42	20	46	22	2	28	51	23
1924	5-Nov-21	3:40:00	1	0	1	0	CT	0	1	82	5	15	3	2	1	30	13	20	0	9	10	40	12	39	28	0	14	6	26	29	33	6	34	93	31	42	19	56	13	52	45
1925	5-Nov-21	3:45:00	1	0	1	0	CT	0	1	84	2	1	7	9	1	16	90	0	0	7	10	31	15	2	71	21	9	11	45	3	1	40	14	20	42	8	45	36	48	68	25
1926	5-Nov-21	3:50:00	1	0	1	0	CT	0	1	42	0	0	9	20	6	20	69	0	0	1	2	29	35	0	77	57	8	11	26	55	29	74	19	68	53	8	32	61	8	69	47
1927	5-Nov-21	3:55:00	1	0	1	0	CT	0	1	2	0	1	8	21	0	23	24	0	5	11	8	19	66	7	40	93	8	2	7	38	19	41	16	85	14	12	29	3	28	19	16
1928	5-Nov-21	4:00:00	1	0	1	0	CT	0	1	60	0	33	7	11	0	2	28	4	16	14	6	70	24	17	11	73	23	11	2	5	68	30	37	67	23	20	32	28	23	48	22
1929	5-Nov-21	4:05:00	1	0	1	0	CT	0	1	12	0	20	3	14	0	20	0	0	5	11	1	42	37	35	7	53	10	2	0	15	15	34	14	13	25	37	21	22	18	75	26
1930	5-Nov-21	4:10:00	1	0	1	0	CT	0	1	30	0	10	1	5	0	32	63	0	14	12	0	37	18	18	18	42	10	35	65	46	14	7	6	105	27	19	20	20	8	52	9
1931	5-Nov-21	4:15:00	1	0	1	0	CT	0	1	9	0	2	6	0	13	11	67	0	1	4	9	17	13	51	6	41	9	22	2	11	20	23	2	33	7	8	19	0	14	21	1
1932	5-Nov-21	4:20:00	1	0	1	0	CT	0	0	7	0	38	0	0	75	19	0	0	0	0	38	27	0	0	0	1	8	0	0	15	0	0	0	9	0	0	63	0	0	0	0
1933	5-Nov-21	4:25:00	1	0	1	0	CT	0	0	0	28	63	6	1	58	63	0	1	0	0	16	4	0	72	0	19	71	17	0	0	0	8	0	60	0	0	0	0	0	0	0
1934	5-Nov-21	4:30:00	1	0	1	0	CT	0	0	65	59	86	0	118	57	0	9	26	64	0	71	4	0	93	0	100	81	0	0	59	0	72	0	33	49	9	0	0	0	99	25
1935	5-Nov-21	4:35:00	1	0	1	0	CT	0	0	94	53	101	0	118	42	0	0	131	84	0	55	0	0	81	0	60	52	0	0	25	0	99	0	0	41	2	0	0	0	136	71
1936	5-Nov-21	4:40:00	1	0	1	0	CT	0	0	110	24	121	69	72	37	0	0	117	63	0	47	0	0	85	0	35	26	0	9	37	0	63	20	0	45	73	0	1	3	113	64
1937	5-Nov-21	4:45:00	1	0	1	0	CT	0	0	81	11	47	80	108	60	0	0	107	49	0	26	0	0	68	2	45	18	21	109	17	0	91	92	0	0	93	0	0	0	65	25
1938	5-Nov-21	4:50:00	1	0	1	0	CT	0	0	106	8	60	85	105	36	0	108	99	52	0	0	0	0	77	0	57	6	30	69	34	0	98	76	0	26	65	0	46	61	29	59
1939	5-Nov-21	4:55:00	1	0	1	0	CT	0	0	31	45	80	69	59	48	0	56	84	33	0	23	0	0	61	0	0	0	61	50	19	8	75	64	0	64	73	0	34	60	37	52
1940	5-Nov-21	5:00:00	1	0	1	0	CT	0	0	108	34	75	96	95	42	0	0	102	7	0	52	1	0	55	0	0	0	52	78	50	47	86	55	0	13	38	5	31	46	100	23
1941	5-Nov-21	5:05:00	1	0	1	0	CT	0	0	118	20	53	62	51	40	7	0	37	55	0	46	64	51	96	0	0	0	53	78	33	34	58	66	0	6	0	67	0	63	96	0
1942	5-Nov-21	5:10:00	1	0	1	0	CT	0	0	101	0	47	61	85	44	0	0	10	29	0	39	105	69	89	12	84	0	31	50	31	0	44	0	0	53	0	76	0	6	26	33
1943	5-Nov-21	5:15:00	1	0	1	0	CT	0	0	100	0	43	67	11	17	0	0	0	42	0	0	82	73	68	13	85	18	0	31	47	0	54	0	0	56	0	72	2	0	105	72
1944	5-Nov-21	5:20:00	1	0	1	0	CT	0	0	73	0	83	65	50	29	0	0	0	48	0	0	132	81	69	78	46	44	2	50	33	0	76	51	0	84	15	38	0	46	78	22
1945	5-Nov-21	5:25:00	1	0	1	0	CT	0	0	0	0	46	0	91	36	0	0	0	3	0	0	63	55	28	49	54	26	40	0	49	0	42	31	0	27	66	7	0	42	34	45
1946	5-Nov-21	5:30:00	1	0	1	0	CT	0	0	0	0	0	0	121	0	0	0	0	0	49	0	0	60	58	0	21	63	50	16	38	42	65	45	0	68	67	0	0	20	0	52
1947	5-Nov-21	5:35:00	1	0	1	0	CT	0	0	0	0	0	0	101	0	0	0	0	0	105	0	12	19	86	0	0	30	49	76	27	33	9	16	73	43	68	0	40	7	10	62
1948	5-Nov-21	5:40:00	1	0	1	0	CT	0	0	0	0	0	0	108	0	0	0	0	0	85	0	93	0	25	0	63	37	28	60	30	20	56	21	59	44	11	0	0	29	112	53
1949	5-Nov-21	5:45:00	1	0	1	0	CT	0	0	0	0	0	0	0	21	0	0	0	0	47	0	24	0	80	0	78	29	49	28	21	0	70	74	89	65	0	40	0	13	96	48
1950	5-Nov-21	5:50:00	1	0	1	0	CT	0	0	0	0	1	0	0	56	0	0	0	0	66	0	0	0	67	0	40	44	0	6	0	0	40	68	35	7	0	80	0	44	69	69
1951	5-Nov-21	5:55:00	1	0	1	0	CT	0	0	0	0	58	0	79	42	0	0	0	0	71	0	0	60	77	0	52	63	0	19	0	0	15	0	8	37	0	51	0	14	47	34
1952	5-Nov-21	6:00:00	1	0	1	0	CT	0	0	61	0	50	0	63	55	0	0	0	0	72	47	38	96	57	0	50	55	0	46	0	21	0	26	58	32	17	60	0	37	14	59
1953	5-Nov-21	6:05:00	1	0	1	0	CT	0	0	102	0	0	0	0	28	0	0	2	0	56	25	0	32	21	0	54	3	0	37	0	17	0	63	89	1	66	22	0	27	3	64
1954	5-Nov-21	6:10:00	1	0	1	0	CT	0	0	63	0	43	7	0	0	0	0	0	0	65	26	0	57	72	0	0	0	38	32	0	22	0	68	75	28	50	0	0	0	84	0
1955	5-Nov-21	6:15:00	1	0	1	0	CT	0	0	0	0	28	53	59	0	0	0	0	0	80	43	0	58	78	0	0	0	41	0	0	0	0	30	0	60	18	0	0	13	102	58
1956	5-Nov-21	6:20:00	1	0	1	0	CT	0	0	0	0	0	51	36	1	0	0	0	0	1	0	0	0	14	0	0	19	43	0	0	0	40	0	0	41	5	0	0	51	82	24
1957	5-Nov-21	6:25:00	1	0	1	0	CT	0	0	0	0	0	71	103	13	0	0	0	0	0	0	0	0	0	0	0	53	0	84	0	0	90	0	0	8	95	0	0	27	54	10
1958	5-Nov-21	6:30:00	1	0	1	0	CT	0	0	0	0	0	12	83	0	0	0	1	0	0	0	28	1	63	0	0	33	14	71	0	0	70	0	0	0	77	60	0	10	18	72
1959	5-Nov-21	6:35:00	1	0	1	0	CT	0	0	0	0	0	0	33	0	59	0	1	0	0	0	0	14	47	0	0	43	0	35	0	0	47	56	0	8	47	65	0	38	0	55
1960	5-Nov-21	6:40:00	1	0	1	0	CT	0	0	4	0	0	0	0	0	103	0	0	0	0	0	0	69	11	1	0	33	0	0	0	12	63	37	0	55	0	7	0	37	0	67
1961	5-Nov-21	6:45:00	1	0	1	0	CT	0	0	2	0	0	1	0	19	62	0	0	0	0	0	0	34	46	0	0	48	0	34	0	44	0	0	0	46	0	0	0	8	0	35
1962	5-Nov-21	6:50:00	1	0	1	0	CT	0	0	0	0	0	0	56	33	59	0	0	0	0	0	0	0	0	1	10	28	0	75	0	2	0	0	0	3	0	0	0	20	85	0
1963	5-Nov-21	6:55:00	1	0	1	0	CT	0	0	0	0	15	0	80	53	95	0	0	0	0	0	0	0	73	0	2	8	16	40	0	0	0	0	0	22	0	0	0	32	83	0
1964	5-Nov-21	7:00:00	1	0	1	0	CT	0	0	96	0	73	0	90	44	54	0	1	0	0	0	0	0	45	0	0	0	43	0	0	0	0	7	0	10	0	47	0	40	105	52
1965	5-Nov-21	7:05:00	1	0	1	0	CT	0	0	82	0	56	0	0	28	87	0	0	3	0	0	0	11	26	0	0	34	4	0	10	9	0	76	0	2	0	40	0	4	14	63
1966	5-Nov-21	7:10:00	1	0	1	0	CT	0	0	76	0	0	0	0	0	119	0	40	0	0	2	0	85	0	0	3	58	0	37	52	26	0	64	0	62	1	63	0	0	10	45
1967	5-Nov-21	7:15:00	1	0	1	0	CT	0	0	105	0	0	0	0	0	84	0	0	0	0	37	0	84	41	0	0	32	0	73	0	3	0	73	0	40	35	0	0	35	48	26
1968	5-Nov-21	7:20:00	1	0	1	0	CT	0	0	5	2	8	0	66	0	34	0	0	0	0	0	0	0	106	0	43	26	0	33	0	1	0	38	47	0	78	0	0	11	81	0
1969	5-Nov-21	7:25:00	1	0	1	0	CT	0	0	0	68	74	0	41	0	87	0	0	0	0	0	0	0	53	1	53	18	1	1	0	36	0	0	107	0	80	0	0	18	0	59
1970	5-Nov-21	7:30:00	1	0	1	0	CT	0	0	0	60	0	1	0	0	70	0	0	0	0	0	0	0	1	22	0	49	19	4	0	42	0	0	29	18	76	0	0	2	0	70
1971	5-Nov-21	7:35:00	1	0	1	0	CT	0	0	0	46	0	0	0	0	31	15	0	0	0	0	0	38	0	0	0	1	0	64	62	24	0	0	34	29	45	0	4	0	30	26
1972	5-Nov-21	7:40:00	1	0	1	0	CT	0	0	0	21	0	0	48	0	63	2	0	0	0	0	0	87	48	0	0	0	13	39	0	16	0	0	67	0	2	61	15	0	71	5
1973	5-Nov-21	7:45:00	1	0	1	0	CT	0	0	0	36	0	0	103	44	0	52	0	0	0	0	0	73	1	0	0	0	37	49	5	40	0	58	32	0	1	76	0	26	7	56
1974	5-Nov-21	7:50:00	1	0	1	0	CT	0	0	0	36	1	0	4	40	0	40	0	0	0	0	0	0	84	0	0	0	9	24	72	0	0	66	0	38	37	18	0	50	5	16
1975	5-Nov-21	7:55:00	1	0	1	0	CT	0	0	0	0	0	0	0	0	0	11	0	0	0	0	0	0	67	0	0	67	0	32	35	0	0	17	0	49	67	0	0	25	55	0
1976	5-Nov-21	8:00:00	1	0	1	0	CT	0	0	48	0	0	4	10	0	0	21	0	0	0	2	0	0	71	0	0	34	0	56	0	0	0	0	0	12	59	5	0	0	85	0
1977	5-Nov-21	8:05:00	1	0	1	0	CT	0	0	86	0	0	0	12	0	0	0	1	0	6	3	0	6	0	0	0	14	0	36	0	0	0	0	0	0	15	1	0	30	77	73
1978	5-Nov-21	8:10:00	1	0	1	0	CT	0	0	49	0	43	0	117	0	0	0	0	0	3	0	0	40	0	0	0	45	1	21	0	0	0	0	0	0	0	0	0	47	2	73
1979	5-Nov-21	8:15:00	1	0	1	0	CT	0	0	0	0	87	31	90	0	0	0	0	0	0	15	0	0	26	0	0	33	0	7	0	1	1	0	28	7	0	0	0	29	0	30
1980	5-Nov-21	8:20:00	1	0	1	0	CT	0	0	0	0	67	0	4	0	13	0	13	0	0	53	0	97	73	0	0	4	0	1	0	70	0	0	0	26	0	4	0	31	0	0
1981	5-Nov-21	8:25:00	1	0	1	0	CT	0	0	0	0	51	0	0	0	0	0	0	0	0	14	0	89	44	0	0	0	0	70	0	67	0	0	0	42	1	0	0	21	41	0
1982	5-Nov-21	8:30:00	1	0	1	0	CT	0	0	0	0	18	0	0	0	0	2	0	0	0	1	0	53	14	0	0	0	4	45	0	19	0	0	0	0	0	0	0	0	110	32
1983	5-Nov-21	8:35:00	1	0	1	0	CT	0	0	0	0	0	0	25	0	0	0	0	0	0	0	0	37	39	0	0	0	0	63	0	0	0	0	0	1	63	0	0	0	50	51
1984	5-Nov-21	8:40:00	1	0	1	0	CT	0	0	0	0	0	3	70	32	0	0	0	0	0	0	0	0	76	0	0	0	0	0	0	0	0	0	0	0	52	40	0	0	0	52
1985	5-Nov-21	8:45:00	1	0	1	0	CT	0	0	0	0	0	7	60	46	40	0	0	0	0	0	95	0	1	0	0	24	0	0	0	0	0	0	0	22	62	73	0	10	0	16
1986	5-Nov-21	8:50:00	1	0	1	0	CT	0	0	0	0	0	0	0	26	73	0	0	0	0	0	39	0	0	0	0	36	0	39	0	0	0	0	0	36	25	26	0	53	0	11
1987	5-Nov-21	8:55:00	1	0	1	0	CT	0	0	0	0	0	0	0	31	79	0	0	0	0	0	3	0	0	0	69	27	0	38	0	0	0	0	0	32	0	0	0	7	0	63
1988	5-Nov-21	9:00:00	1	0	1	0	CT	0	0	13	0	0	41	0	2	73	0	0	0	0	0	12	0	59	0	86	0	0	12	0	0	0	0	0	0	0	0	0	11	0	23
1989	5-Nov-21	9:05:00	1	0	1	0	CT	0	0	122	0	0	81	66	55	0	0	0	0	0	0	0	0	67	0	61	0	0	0	0	0	0	0	4	0	0	0	0	26	0	79
1990	5-Nov-21	9:10:00	1	0	1	0	CT	0	0	91	0	0	65	102	0	0	0	0	0	0	0	0	21	26	0	0	0	0	45	0	0	0	0	0	0	0	0	0	0	0	47
1991	5-Nov-21	9:15:00	1	0	1	0	CT	0	0	0	0	0	6	28	0	0	0	0	0	58	0	0	0	0	0	0	0	0	26	0	0	0	0	0	0	0	19	0	36	0	10
1992	5-Nov-21	9:20:00	1	0	1	0	CT	0	0	0	0	0	0	21	0	0	75	0	0	58	0	0	0	0	0	0	0	0	34	0	0	0	0	0	35	0	42	0	9	0	0
1993	5-Nov-21	9:25:00	1	0	1	0	CT	0	0	0	0	0	0	0	0	0	3	0	0	63	0	0	0	0	0	0	0	0	24	0	0	0	0	0	19	57	28	0	0	0	0
1994	5-Nov-21	9:30:00	1	0	1	0	CT	0	0	0	20	0	0	24	0	0	0	0	0	42	0	0	0	0	0	0	6	0	22	0	0	0	0	0	59	55	0	0	0	0	0
1995	5-Nov-21	9:35:00	1	0	1	0	CT	0	0	0	0	0	0	88	0	0	0	0	0	13	0	0	0	0	0	0	57	0	2	0	0	1	0	0	32	81	0	0	0	0	52
1996	5-Nov-21	9:40:00	1	0	1	0	CT	0	0	0	0	0	0	83	0	0	0	0	0	0	0	0	2	32	0	0	23	0	18	0	0	22	0	0	22	74	0	0	23	42	54
1997	5-Nov-21	9:45:00	1	0	1	0	CT	0	0	0	0	0	0	63	14	0	1	0	39	0	0	0	104	61	2	0	9	0	61	0	16	0	0	0	0	48	0	0	38	124	48
1998	5-Nov-21	9:50:00	1	0	1	0	CT	0	0	0	0	0	0	81	75	0	0	0	0	0	0	0	65	87	25	0	0	0	49	0	30	0	0	0	0	3	0	0	20	80	0
1999	5-Nov-21	9:55:00	1	0	1	0	CT	0	0	0	0	0	0	89	61	0	0	0	0	0	0	0	57	0	12	0	0	0	19	22	13	0	0	0	0	1	0	0	0	45	0
2000	5-Nov-21	10:00:00	1	0	1	0	CT	0	0	0	0	0	0	0	0	0	0	0	0	0	0	0	0	0	54	0	0	0	0	50	0	0	0	0	0	0	0	0	0	0	0
2001	5-Nov-21	10:05:00	1	0	1	0	CT	0	0	1	0	0	0	0	0	0	0	0	2	0	0	0	0	0	63	0	0	0	0	46	0	0	0	0	0	0	0	0	0	0	0
2002	5-Nov-21	10:10:00	1	0	1	0	CT	0	0	59	0	0	0	0	0	0	0	1	0	0	0	0	0	0	6	0	0	0	25	0	0	0	0	0	0	1	0	0	0	0	0
2003	5-Nov-21	10:15:00	1	0	1	0	CT	0	0	94	0	0	0	0	0	0	0	0	0	0	0	0	0	0	0	0	0	0	17	0	0	0	0	0	0	0	0	0	0	0	0
2004	5-Nov-21	10:20:00	1	0	1	0	CT	0	0	0	0	0	0	0	0	0	0	0	0	0	0	0	0	0	0	0	0	0	0	0	0	0	0	0	0	0	0	0	0	0	0
2005	5-Nov-21	10:25:00	1	0	1	0	CT	0	0	0	0	0	0	0	0	0	0	0	0	0	0	0	0	0	8	0	0	0	0	0	0	0	0	0	0	0	0	0	0	0	0
2006	5-Nov-21	10:30:00	1	0	1	0	CT	0	0	0	5	0	0	31	0	0	0	0	0	0	0	0	0	0	0	0	0	0	0	0	0	0	0	0	0	81	0	0	0	0	0
2007	5-Nov-21	10:35:00	1	0	1	0	CT	0	0	0	0	0	0	94	0	0	12	0	0	0	0	0	0	0	0	0	0	0	0	0	0	0	0	0	0	55	0	0	27	0	0
2008	5-Nov-21	10:40:00	1	0	1	0	CT	0	0	0	0	0	0	0	0	0	39	3	0	0	0	1	0	0	0	0	0	0	0	0	0	0	0	0	0	32	0	0	46	0	0
2009	5-Nov-21	10:45:00	1	0	1	0	CT	0	0	0	0	0	0	0	0	0	10	1	0	0	0	39	0	0	0	0	0	0	0	0	0	0	0	0	0	4	0	0	0	0	0
2010	5-Nov-21	10:50:00	1	0	1	0	CT	0	0	0	0	0	0	0	0	0	0	1	0	0	0	0	0	0	0	0	0	0	22	0	0	0	0	0	0	0	0	0	0	0	0
2011	5-Nov-21	10:55:00	1	0	1	0	CT	0	0	0	0	0	0	0	0	0	0	1	0	0	0	0	0	0	0	0	0	0	42	0	0	0	0	0	6	0	0	0	0	0	0
2012	5-Nov-21	11:00:00	1	0	1	0	CT	0	0	0	0	0	0	0	0	0	0	0	0	0	0	0	0	0	0	0	0	0	57	0	0	0	0	0	0	0	0	0	0	0	0
2013	5-Nov-21	11:05:00	1	0	1	0	CT	0	0	0	0	0	0	0	0	0	0	0	0	0	0	0	0	43	0	0	0	0	23	0	0	0	0	0	0	0	0	0	0	0	0
2014	5-Nov-21	11:10:00	1	0	1	0	CT	0	0	0	0	0	0	0	0	0	0	1	1	0	0	0	0	66	0	0	0	0	0	0	0	0	0	0	0	0	0	0	0	0	0
2015	5-Nov-21	11:15:00	1	0	1	0	CT	0	0	0	0	0	3	0	0	0	0	0	1	0	0	0	0	0	0	0	0	0	0	0	0	0	0	0	0	1	0	0	0	0	0
2016	5-Nov-21	11:20:00	1	0	1	0	CT	0	0	0	0	0	0	0	0	0	0	0	0	0	0	0	0	0	0	0	0	0	0	0	0	0	0	0	0	0	0	0	0	0	0
2017	5-Nov-21	11:25:00	1	0	1	0	CT	0	0	0	0	0	0	0	0	0	0	0	1	0	0	0	0	0	0	0	0	0	0	0	0	0	0	0	0	0	0	0	0	0	0
2018	5-Nov-21	11:30:00	1	0	1	0	CT	0	0	0	17	0	0	0	0	0	0	0	4	0	0	0	0	0	0	0	0	0	0	0	0	0	0	0	0	63	0	0	0	0	0
2019	5-Nov-21	11:35:00	1	0	1	0	CT	0	0	0	0	0	0	0	0	0	0	4	19	0	0	0	0	0	0	0	0	0	0	0	0	0	0	0	0	0	0	1	0	0	0
2020	5-Nov-21	11:40:00	1	0	1	0	CT	0	0	0	0	0	0	0	0	0	0	1	0	0	0	0	0	0	0	0	0	0	0	0	0	0	0	0	0	0	0	2	0	0	0
2021	5-Nov-21	11:45:00	1	0	1	0	CT	0	0	0	0	0	0	0	0	0	0	0	0	0	0	0	0	0	0	0	0	0	0	0	0	0	0	0	0	0	0	0	0	0	0
2022	5-Nov-21	11:50:00	1	0	1	0	CT	0	0	0	43	0	0	0	0	0	0	0	0	0	0	0	0	0	0	0	0	0	1	0	0	0	0	0	5	0	0	0	0	0	0
2023	5-Nov-21	11:55:00	1	0	1	0	CT	0	0	0	47	0	0	0	0	0	0	0	0	0	0	0	0	0	0	0	0	0	0	0	0	0	0	0	0	0	0	0	0	0	0
2024	5-Nov-21	12:00:00	1	0	1	0	CT	0	0	0	8	0	0	0	0	0	0	30	0	0	0	0	0	0	0	0	0	0	0	0	0	0	0	0	0	0	0	0	0	0	0
2025	5-Nov-21	12:05:00	1	0	1	0	CT	0	0	0	0	0	0	0	0	0	0	24	0	0	0	0	0	0	0	0	0	0	0	0	0	0	0	0	0	0	0	0	0	0	0
2026	5-Nov-21	12:10:00	1	0	1	0	CT	0	0	0	0	0	0	0	0	0	0	30	0	0	0	0	0	0	0	0	0	0	0	0	0	1	0	0	0	0	0	0	0	0	0
2027	5-Nov-21	12:15:00	1	0	1	0	CT	0	1	46	44	27	55	20	7	27	42	39	9	50	1	36	9	44	26	41	11	32	20	13	24	69	21	47	20	39	18	12	17	41	13
2028	5-Nov-21	12:20:00	1	0	1	0	CT	0	1	39	4	47	37	57	4	24	47	4	6	39	2	69	45	0	5	67	0	7	22	16	11	56	8	114	4	44	45	19	36	51	23
2029	5-Nov-21	12:25:00	1	0	1	0	CT	0	1	44	3	8	0	25	0	1	23	17	0	11	7	11	0	0	70	24	0	1	12	32	6	32	3	95	1	6	34	16	14	56	0
2030	5-Nov-21	12:30:00	1	0	1	0	CT	0	1	58	1	0	0	0	0	0	77	63	10	24	16	18	13	21	12	7	4	23	14	41	3	47	4	104	0	9	14	2	23	41	18
2031	5-Nov-21	12:35:00	1	0	1	0	CT	0	1	73	23	0	0	1	0	2	41	2	3	57	4	23	24	64	27	27	8	18	10	15	5	49	16	57	4	24	22	14	21	33	16
2032	5-Nov-21	12:40:00	1	0	1	0	CT	0	1	81	8	33	0	2	0	1	0	1	1	56	10	5	12	14	45	17	4	6	5	2	1	54	13	90	12	14	19	1	16	31	3
2033	5-Nov-21	12:45:00	1	0	1	0	CT	0	1	81	15	85	5	0	4	0	0	46	0	58	15	2	22	51	5	9	4	29	7	22	3	47	11	52	12	19	4	3	13	38	8
2034	5-Nov-21	12:50:00	1	0	1	0	CT	0	1	106	38	44	4	0	6	10	0	59	0	76	5	24	22	2	9	7	7	14	11	13	13	28	12	79	7	8	29	25	8	27	11
2035	5-Nov-21	12:55:00	1	0	1	0	CT	0	1	109	41	1	0	0	2	6	0	33	0	73	6	10	17	3	0	13	5	20	2	21	46	33	6	62	18	25	24	12	6	31	5
2036	5-Nov-21	13:00:00	1	0	1	0	CT	0	1	103	83	7	5	0	0	16	38	40	0	83	13	30	4	0	26	18	13	17	15	14	10	16	10	32	16	12	21	13	18	19	10
2037	5-Nov-21	13:05:00	1	0	1	0	CT	0	1	60	41	10	2	0	5	1	0	34	8	51	3	23	11	5	28	52	16	19	14	39	18	9	9	53	13	15	16	8	14	45	11
2038	5-Nov-21	13:10:00	1	0	1	0	CT	0	1	90	34	9	7	6	5	21	18	5	5	49	12	34	3	0	2	73	20	14	0	47	7	15	11	51	5	15	18	2	16	28	20
2039	5-Nov-21	13:15:00	1	0	1	0	CT	0	1	102	47	37	13	29	8	14	73	30	19	30	5	31	10	1	3	88	13	6	10	31	24	14	4	0	9	22	22	25	16	21	11
2040	5-Nov-21	13:20:00	1	0	1	0	CT	0	1	41	34	4	3	9	4	18	76	4	7	60	13	23	25	47	63	73	10	17	3	5	27	20	15	0	10	17	32	1	10	26	1
2041	5-Nov-21	13:25:00	1	0	1	0	CT	0	1	0	23	22	0	22	0	3	53	0	7	64	25	28	36	40	63	67	13	17	4	22	14	37	10	42	7	13	20	1	19	21	0
2042	5-Nov-21	13:30:00	1	0	1	0	CT	0	1	0	15	24	8	8	7	7	0	0	1	4	13	53	59	35	53	6	11	12	8	52	42	4	13	28	17	19	31	10	53	26	0
2043	5-Nov-21	13:35:00	1	0	1	0	CT	0	1	0	50	18	4	8	0	22	1	0	1	5	6	11	25	29	0	63	21	15	20	30	77	25	10	41	10	21	18	5	43	27	0
2044	5-Nov-21	13:40:00	1	0	1	0	CT	0	1	39	18	17	0	25	0	1	27	0	5	2	7	16	49	75	0	71	8	25	15	22	54	21	7	81	6	15	21	5	42	54	0
2045	5-Nov-21	13:45:00	1	0	1	0	CT	0	1	43	2	17	4	9	4	19	84	0	8	18	0	24	28	65	0	59	17	5	7	52	35	34	9	45	8	12	11	24	39	63	0
2046	5-Nov-21	13:50:00	1	0	1	0	CT	0	1	8	2	13	25	4	2	34	25	0	15	20	3	28	21	27	0	52	13	10	9	6	36	4	4	53	18	15	1	31	47	27	20
2047	5-Nov-21	13:55:00	1	0	1	0	CT	0	1	0	0	7	26	9	8	7	0	0	15	27	14	38	24	59	0	49	2	14	15	4	43	39	0	37	11	48	11	41	39	81	13
2048	5-Nov-21	14:00:00	1	0	1	0	CT	0	1	1	0	25	9	18	10	12	0	0	13	4	10	38	55	50	0	64	11	12	2	35	21	11	3	54	9	16	14	29	45	98	19
2049	5-Nov-21	14:05:00	1	0	1	0	CT	0	1	0	2	15	17	0	2	15	26	0	3	17	1	15	37	75	0	38	42	7	0	19	61	27	15	18	8	10	12	5	60	96	13
2050	5-Nov-21	14:10:00	1	0	1	0	CT	0	1	0	19	12	15	0	2	18	0	49	0	6	16	14	56	45	10	5	13	20	13	17	33	4	18	2	7	6	21	9	30	73	17
2051	5-Nov-21	14:15:00	1	0	1	0	CT	0	1	5	23	24	8	0	2	12	7	59	1	2	4	29	15	79	9	9	8	6	1	9	46	38	23	9	12	13	11	43	28	38	7
2052	5-Nov-21	14:20:00	1	0	1	0	CT	0	1	1	1	13	12	0	0	24	0	31	6	5	9	37	5	61	30	8	14	20	8	48	36	26	37	24	11	19	15	23	23	10	14
2053	5-Nov-21	14:25:00	1	0	1	0	CT	0	1	0	0	3	16	8	7	19	0	0	1	15	1	16	8	28	63	11	12	12	13	16	35	36	55	84	12	12	28	53	32	20	14
2054	5-Nov-21	14:30:00	1	0	1	0	CT	0	1	59	2	19	6	28	0	25	0	0	2	62	0	35	40	0	20	16	9	23	7	45	0	62	42	40	10	16	7	49	44	37	13
2055	5-Nov-21	14:35:00	1	0	1	0	CT	0	1	84	7	1	16	15	0	9	0	33	1	77	3	32	24	1	52	11	7	18	13	6	27	43	68	6	11	15	23	28	42	44	6
2056	5-Nov-21	14:40:00	1	0	1	0	CT	0	1	71	34	2	50	6	0	6	0	20	12	74	9	36	15	26	13	22	6	9	40	33	26	33	31	31	8	8	11	17	20	81	14
2057	5-Nov-21	14:45:00	1	0	1	0	CT	0	1	88	58	2	38	5	0	14	8	26	19	28	0	42	19	8	5	10	18	11	25	27	0	47	13	41	12	23	44	19	25	89	9
2058	5-Nov-21	14:50:00	1	0	1	0	CT	0	1	104	38	4	37	31	0	12	71	6	1	8	5	11	13	6	0	27	42	3	21	44	3	63	0	5	15	33	6	0	23	82	8
2059	5-Nov-21	14:55:00	1	0	1	0	CT	0	1	81	38	21	57	27	0	30	18	7	13	0	6	20	45	16	22	7	14	2	13	12	32	64	33	0	5	26	13	30	17	69	9
2060	5-Nov-21	15:00:00	1	0	1	0	CT	0	1	98	48	2	31	23	0	9	65	0	1	1	4	50	20	50	47	16	22	7	0	0	21	10	54	37	5	27	10	14	24	10	11
2061	5-Nov-21	15:05:00	1	0	1	0	CT	0	1	57	35	0	23	32	0	24	58	12	0	30	11	25	94	77	12	11	13	28	24	28	32	22	84	19	16	47	10	4	20	14	20
2062	5-Nov-21	15:10:00	1	0	1	0	CT	0	1	27	4	20	52	0	0	11	66	4	14	8	21	80	40	41	37	19	10	5	28	24	0	63	21	63	6	65	25	1	3	73	15
2063	5-Nov-21	15:15:00	1	0	1	0	CT	0	1	13	1	35	33	0	0	6	75	0	13	8	0	31	16	34	63	65	6	6	18	37	46	36	57	0	4	22	20	25	28	73	37
2064	5-Nov-21	15:20:00	1	0	1	0	CT	0	1	16	9	11	29	0	8	22	73	41	0	12	6	28	6	36	5	89	15	16	4	0	43	44	44	58	9	26	9	44	52	74	31
2065	5-Nov-21	15:25:00	1	0	1	0	CT	0	1	0	12	17	25	0	10	18	36	83	0	12	8	35	5	20	5	68	5	8	11	38	36	75	44	71	10	36	22	28	11	66	8
2066	5-Nov-21	15:30:00	1	0	1	0	CT	0	1	7	2	13	41	0	15	6	0	102	4	9	12	43	19	29	0	70	27	12	29	10	0	10	38	41	7	88	24	52	21	74	7
2067	5-Nov-21	15:35:00	1	0	1	0	CT	0	1	37	2	13	10	15	9	23	0	76	13	6	9	91	17	2	63	65	19	7	39	0	0	32	27	37	6	89	21	18	33	32	4
2068	5-Nov-21	15:40:00	1	0	1	0	CT	0	1	87	4	11	23	4	0	13	0	60	13	7	5	52	8	25	5	30	8	11	60	9	46	29	18	8	19	90	15	0	29	101	6
2069	5-Nov-21	15:45:00	1	0	1	0	CT	0	1	78	1	16	14	3	2	12	0	0	5	10	7	43	3	3	14	7	17	15	29	74	26	45	9	0	16	42	21	28	36	33	13
2070	5-Nov-21	15:50:00	1	0	1	0	CT	0	1	68	43	26	6	15	2	22	0	0	5	33	4	31	28	1	28	10	7	5	2	27	41	17	8	9	7	23	19	65	35	62	6
2071	5-Nov-21	15:55:00	1	0	1	0	CT	0	1	67	70	22	4	3	7	24	17	0	6	8	14	76	24	0	65	60	5	4	15	21	24	35	11	71	2	17	19	34	23	75	14
2072	5-Nov-21	16:00:00	1	0	1	0	CT	0	1	77	28	1	8	16	2	30	35	31	13	14	9	41	22	6	28	43	7	24	20	18	0	48	18	12	13	22	18	41	45	59	59
2073	5-Nov-21	16:05:00	1	0	1	0	CT	0	1	18	42	0	22	12	7	21	47	44	14	13	17	29	2	36	28	82	13	11	53	41	0	60	42	16	14	15	22	32	45	28	46
2074	5-Nov-21	16:10:00	1	0	1	0	CT	0	1	3	35	0	4	17	9	24	0	47	10	89	0	90	14	0	0	46	8	37	45	9	15	56	46	72	21	12	35	3	24	62	41
2075	5-Nov-21	16:15:00	1	0	1	0	CT	0	1	35	36	0	18	35	0	21	0	57	7	43	1	48	3	0	0	21	12	65	68	20	37	57	60	0	16	16	26	46	14	79	32
2076	5-Nov-21	16:20:00	1	0	1	0	CT	0	1	28	43	0	8	20	2	17	0	45	6	11	4	38	0	17	0	4	14	54	15	54	24	78	33	0	8	12	8	48	37	87	26
2077	5-Nov-21	16:25:00	1	0	1	0	CT	0	1	47	21	0	16	24	0	13	50	54	16	5	0	53	19	1	0	7	20	23	47	25	33	28	15	0	19	17	20	31	30	4	24
2078	5-Nov-21	16:30:00	1	0	1	0	CT	0	1	54	2	0	14	19	0	20	0	9	13	1	3	11	50	36	1	11	11	11	35	7	19	30	23	0	17	5	9	5	20	77	10
2079	5-Nov-21	16:35:00	1	0	1	0	CT	0	1	2	25	4	10	75	0	37	0	0	2	5	7	37	42	2	4	58	10	37	7	41	9	41	67	0	17	5	24	17	34	106	15
2080	5-Nov-21	16:40:00	1	0	1	0	CT	0	1	9	29	18	17	1	0	15	19	0	14	8	9	52	29	14	0	70	18	22	0	45	0	22	26	51	34	29	32	48	17	15	11
2081	5-Nov-21	16:45:00	1	0	1	0	CT	0	1	0	22	20	10	20	4	7	27	16	3	24	10	15	24	10	2	27	16	27	0	31	9	24	12	34	27	59	47	69	5	71	13
2082	5-Nov-21	16:50:00	1	0	1	0	CT	0	1	0	1	15	12	10	3	12	15	11	9	82	10	48	4	27	6	13	23	43	24	16	53	23	13	55	21	101	51	25	28	80	2
2083	5-Nov-21	16:55:00	1	0	1	0	CT	0	1	0	6	35	23	47	5	0	0	2	3	46	13	42	24	43	18	92	17	25	16	40	20	64	20	36	12	36	37	4	22	82	5
2084	5-Nov-21	17:00:00	1	0	1	0	CT	0	1	0	0	17	20	4	2	11	0	18	8	57	9	35	24	55	63	54	6	36	45	43	13	65	11	0	8	8	43	54	17	38	11
2085	5-Nov-21	17:05:00	1	0	1	0	CT	0	1	3	25	28	11	0	5	19	0	4	7	42	29	21	12	62	44	64	16	38	79	30	36	49	12	24	14	14	38	38	39	74	16
2086	5-Nov-21	17:10:00	1	0	1	0	CT	0	1	0	34	3	8	11	1	19	0	1	10	2	49	35	7	12	14	0	21	33	34	24	40	40	12	18	13	20	43	44	40	56	5
2087	5-Nov-21	17:15:00	1	0	1	0	CT	0	1	53	30	5	9	24	7	23	0	10	9	7	37	43	32	22	5	2	12	49	13	41	34	57	9	53	69	10	46	38	38	77	21
2088	5-Nov-21	17:20:00	1	0	1	0	CT	0	1	71	11	1	7	5	5	11	41	9	9	1	11	63	17	1	12	66	12	33	61	28	0	74	8	16	42	12	46	71	33	35	14
2089	5-Nov-21	17:25:00	1	0	1	0	CT	0	1	106	54	0	2	1	6	20	66	10	5	3	2	54	36	22	28	71	34	27	27	1	0	45	29	47	38	11	38	28	26	60	30
2090	5-Nov-21	17:30:00	1	0	1	0	CT	0	1	96	31	0	2	0	5	12	0	0	2	16	0	48	34	28	11	55	11	8	37	35	0	25	26	46	7	10	35	33	20	50	12
2091	5-Nov-21	17:35:00	1	0	1	0	CT	0	1	97	0	18	13	0	0	2	4	0	18	17	0	57	8	11	9	26	29	22	27	1	0	2	4	12	28	12	49	89	22	55	32
2092	5-Nov-21	17:40:00	1	0	1	0	CT	0	1	66	9	35	17	0	3	43	2	0	18	4	15	13	17	37	22	104	13	1	35	0	0	26	34	0	32	31	42	42	22	68	49
2093	5-Nov-21	17:45:00	1	0	1	0	CT	0	1	56	4	38	8	18	1	12	11	0	9	11	40	18	16	44	18	47	13	4	0	0	0	81	45	0	23	73	28	33	25	39	41
2094	5-Nov-21	17:50:00	1	0	1	0	CT	0	1	100	17	74	13	7	37	4	0	14	11	3	4	80	26	3	0	24	13	13	5	35	0	15	33	23	16	64	37	19	21	48	56
2095	5-Nov-21	17:55:00	1	0	1	0	CT	0	1	66	2	68	3	3	12	13	10	31	5	44	43	14	22	17	4	7	13	7	21	42	0	4	32	28	26	44	7	49	31	77	53
2096	5-Nov-21	18:00:00	1	0	1	0	CT	0	1	2	2	3	4	15	6	16	59	67	15	87	25	1	48	11	10	13	7	5	37	42	29	17	29	11	9	42	26	39	31	23	10
2097	5-Nov-21	18:05:00	1	0	1	0	CT	0	1	6	0	1	7	27	4	10	16	92	4	98	17	9	41	0	12	4	16	11	18	44	47	53	53	41	6	39	21	19	19	4	12
2098	5-Nov-21	18:10:00	1	0	1	0	CT	0	1	1	0	0	18	3	0	30	43	82	0	43	2	35	21	2	2	20	9	7	41	18	42	80	38	66	18	48	33	9	25	31	14
2099	5-Nov-21	18:15:00	1	0	1	0	CT	0	1	30	3	15	9	26	0	39	14	30	0	5	5	25	13	2	0	14	10	5	39	42	42	38	22	45	17	47	33	56	44	72	11
2100	5-Nov-21	18:20:00	1	0	1	0	CT	0	1	27	15	2	2	16	0	15	0	0	11	1	3	40	23	5	0	10	16	0	25	46	18	49	8	22	15	54	42	60	29	56	8
2101	5-Nov-21	18:25:00	1	0	1	0	CT	0	1	93	56	12	10	11	0	21	21	0	18	10	0	58	28	1	43	14	13	11	24	23	56	37	8	36	22	25	37	46	28	57	14
2102	5-Nov-21	18:30:00	1	0	1	0	CT	0	1	81	2	17	67	2	0	20	0	4	4	21	41	65	15	8	2	0	3	30	72	16	66	46	18	114	21	21	6	52	42	38	15
2103	5-Nov-21	18:35:00	1	0	1	0	CT	0	1	80	30	11	38	1	4	22	0	21	14	15	19	31	10	51	0	1	15	14	30	26	63	50	9	4	16	18	25	14	35	69	48
2104	5-Nov-21	18:40:00	1	0	1	0	CT	0	1	44	32	6	33	0	0	10	0	58	2	12	3	48	23	45	11	25	10	9	34	12	37	40	16	38	1	20	38	32	12	34	25
2105	5-Nov-21	18:45:00	1	0	1	0	CT	0	1	68	2	22	61	23	0	16	0	87	1	8	0	35	13	40	36	2	20	16	36	54	2	16	4	65	16	14	35	34	52	78	4
2106	5-Nov-21	18:50:00	1	0	1	0	CT	0	1	87	3	92	21	16	0	18	0	14	12	13	1	36	55	38	0	46	19	11	27	22	0	17	19	42	54	13	18	41	31	47	8
2107	5-Nov-21	18:55:00	1	0	1	0	CT	0	1	39	9	62	4	25	0	13	38	0	4	4	7	31	40	41	0	76	21	11	13	29	20	71	32	22	8	8	13	16	21	38	10
2108	5-Nov-21	19:00:00	1	0	1	0	CT	0	1	72	1	107	0	36	11	11	16	0	20	44	11	30	37	33	0	83	15	6	37	8	26	102	15	0	34	3	16	0	28	60	9
2109	5-Nov-21	19:05:00	1	0	1	0	CT	0	1	55	3	43	17	18	7	9	8	0	3	12	2	44	30	31	0	64	7	3	42	50	31	41	11	2	36	8	13	37	37	35	24
2110	5-Nov-21	19:10:00	1	0	1	0	CT	0	1	2	19	5	45	6	4	8	20	0	8	10	26	35	49	12	0	45	22	7	23	22	28	34	9	5	42	24	19	56	16	99	4
2111	5-Nov-21	19:15:00	1	0	1	0	CT	0	1	8	42	18	63	1	1	31	20	15	7	9	53	23	6	39	2	51	14	4	26	31	41	57	9	6	17	6	10	50	17	76	3
2112	5-Nov-21	19:20:00	1	0	1	0	CT	0	1	48	56	10	58	0	1	16	50	38	3	16	7	53	12	12	29	36	12	0	49	34	5	74	12	51	8	4	25	47	41	76	10
2113	5-Nov-21	19:25:00	1	0	1	0	CT	0	1	12	43	18	8	17	0	21	22	78	34	44	5	45	9	31	20	92	14	38	15	25	16	59	15	61	11	22	13	35	32	67	4
2114	5-Nov-21	19:30:00	1	0	1	0	CT	0	1	97	3	35	1	6	3	22	47	72	0	57	4	0	15	12	61	92	16	47	32	11	52	27	18	43	9	25	21	29	23	51	3
2115	5-Nov-21	19:35:00	1	0	1	0	CT	0	1	70	0	39	36	22	0	15	0	19	0	34	4	2	59	4	8	82	5	59	31	0	36	75	60	56	18	34	6	52	20	100	11
2116	5-Nov-21	19:40:00	1	0	1	0	CT	0	1	109	2	36	50	13	1	5	78	0	28	7	4	20	22	24	12	29	6	11	36	22	22	64	28	0	18	21	6	2	21	80	7
2117	5-Nov-21	19:45:00	1	0	1	0	CT	0	1	76	6	67	39	13	2	14	32	0	22	8	0	31	19	27	58	5	10	7	12	48	0	53	17	20	23	14	21	26	11	71	11
2118	5-Nov-21	19:50:00	1	0	1	0	CT	0	1	67	4	56	2	1	33	12	22	1	7	17	23	40	21	41	2	83	12	1	25	14	11	34	15	47	11	18	25	41	23	44	17
2119	5-Nov-21	19:55:00	1	0	1	0	CT	0	1	31	1	52	11	19	3	17	0	12	2	8	38	80	12	22	13	55	12	4	25	43	23	42	30	0	2	22	17	43	9	80	17
2120	5-Nov-21	20:00:00	1	0	1	0	CT	0	1	14	24	5	4	25	5	15	0	21	12	6	7	47	50	38	9	34	11	47	28	29	22	77	31	31	21	30	31	12	13	35	11
2121	5-Nov-21	20:05:00	1	0	1	0	CT	0	1	68	6	13	7	30	2	29	0	65	4	3	2	44	23	0	8	50	15	66	30	3	24	26	13	105	19	25	21	46	27	47	18
2122	5-Nov-21	20:10:00	1	0	1	0	CT	0	1	5	64	11	10	20	0	3	37	85	10	16	2	6	29	9	36	0	17	48	27	4	17	58	4	21	40	12	11	15	11	19	9
2123	5-Nov-21	20:15:00	1	0	1	0	CT	0	1	4	64	14	1	2	2	10	10	39	0	13	2	29	9	2	2	0	7	6	10	5	18	34	2	30	8	8	8	1	0	14	4
2124	5-Nov-21	20:20:00	1	0	1	0	CT	0	0	63	65	0	0	0	63	0	0	4	0	0	0	0	0	0	0	0	0	0	0	0	63	17	0	63	7	0	0	0	0	0	0
2125	5-Nov-21	20:25:00	1	0	1	0	CT	0	0	0	32	0	0	0	53	2	0	2	13	0	16	0	0	8	0	0	0	63	0	0	0	26	63	0	8	0	0	0	0	1	0
2126	5-Nov-21	20:30:00	1	0	1	0	CT	0	0	0	0	20	0	0	49	120	0	127	80	0	57	0	0	91	0	8	49	35	0	0	1	65	47	40	57	0	0	0	0	0	0
2127	5-Nov-21	20:35:00	1	0	1	0	CT	0	0	0	0	98	85	0	44	100	0	121	76	0	65	0	0	82	0	98	49	68	0	0	0	15	0	9	46	0	0	0	0	0	70
2128	5-Nov-21	20:40:00	1	0	1	0	CT	0	0	0	0	74	64	102	43	111	0	112	73	0	37	0	0	53	0	52	33	72	0	0	0	0	11	0	58	0	0	0	0	0	69
2129	5-Nov-21	20:45:00	1	0	1	0	CT	0	0	0	0	84	64	98	51	88	0	16	89	0	12	0	0	82	0	63	48	54	0	0	0	0	4	0	68	0	0	0	99	0	66
2130	5-Nov-21	20:50:00	1	0	1	0	CT	0	0	34	0	82	70	53	51	126	0	98	52	11	18	1	0	92	0	32	20	37	0	0	0	0	0	0	51	0	0	0	62	0	0
2131	5-Nov-21	20:55:00	1	0	1	0	CT	0	0	94	0	95	65	89	67	138	0	102	4	0	46	106	0	82	0	63	39	53	21	0	0	0	8	44	65	0	0	19	37	19	10
2132	5-Nov-21	21:00:00	1	0	1	0	CT	0	0	60	0	12	36	52	44	123	0	55	0	31	33	91	0	47	26	34	36	38	52	0	0	82	3	64	15	0	0	19	11	113	78
2133	5-Nov-21	21:05:00	1	0	1	0	CT	0	0	82	55	0	43	68	56	119	0	97	4	82	27	91	0	60	35	91	51	31	85	13	0	115	81	74	48	0	0	13	75	98	59
2134	5-Nov-21	21:10:00	1	0	1	0	CT	0	0	0	49	45	0	69	55	127	0	34	46	91	41	66	0	72	63	82	56	34	81	0	0	92	81	21	44	1	0	28	72	76	33
2135	5-Nov-21	21:15:00	1	0	1	0	CT	0	0	0	42	58	21	35	47	148	0	52	44	64	24	90	0	35	74	60	55	35	47	46	0	81	63	63	51	83	0	19	28	89	2
2136	5-Nov-21	21:20:00	1	0	1	0	CT	0	0	0	38	0	73	100	40	156	37	0	63	42	43	12	0	33	0	41	57	37	49	45	2	105	68	0	25	88	0	18	21	84	15
2137	5-Nov-21	21:25:00	1	0	1	0	CT	0	0	30	46	25	54	0	23	101	102	30	48	74	35	91	0	87	13	70	56	61	25	53	0	48	45	12	57	89	0	22	83	73	75
2138	5-Nov-21	21:30:00	1	0	1	0	CT	0	0	119	43	69	87	0	49	119	37	86	54	44	23	67	8	53	0	0	34	46	41	48	0	52	47	0	73	114	1	39	35	34	43
2139	5-Nov-21	21:35:00	1	0	1	0	CT	0	0	130	23	0	66	29	59	89	1	38	5	22	0	66	1	106	13	64	40	43	29	9	0	89	5	58	33	122	1	7	27	99	46
2140	5-Nov-21	21:40:00	1	0	1	0	CT	0	0	78	45	0	57	98	39	132	57	77	0	0	59	30	0	55	22	92	47	59	38	58	0	63	2	103	0	88	0	4	9	114	60
2141	5-Nov-21	21:45:00	1	0	1	0	CT	0	0	38	19	21	15	93	39	123	35	29	47	0	40	53	0	86	0	78	48	13	40	33	15	97	6	62	47	47	11	30	62	91	25
2142	5-Nov-21	21:50:00	1	0	1	0	CT	0	0	0	31	76	77	104	47	103	3	0	46	0	27	3	83	113	18	67	35	1	24	12	44	105	71	70	48	30	4	26	18	69	0
2143	5-Nov-21	21:55:00	1	0	1	0	CT	0	0	0	41	63	59	57	27	116	0	95	36	76	28	128	55	38	66	35	21	48	46	37	49	76	38	87	21	72	34	71	34	107	0
2144	5-Nov-21	22:00:00	1	0	1	0	CT	0	0	0	33	36	50	73	45	120	0	66	69	79	41	61	59	112	6	30	43	43	51	35	24	113	33	62	0	93	92	57	40	61	42
2145	5-Nov-21	22:05:00	1	0	1	0	CT	0	0	0	22	55	1	118	29	110	0	60	50	56	32	0	81	62	63	28	47	41	43	13	57	57	46	72	43	81	74	6	42	73	91
2146	5-Nov-21	22:10:00	1	0	1	0	CT	0	0	39	48	85	3	38	0	116	0	0	40	54	41	86	28	72	74	41	48	36	5	35	11	77	83	82	73	5	59	46	24	76	65
2147	5-Nov-21	22:15:00	1	0	1	0	CT	0	0	110	19	60	69	0	0	92	0	51	30	60	6	108	84	49	11	47	37	40	45	21	0	93	52	110	77	20	58	42	21	89	19
2148	5-Nov-21	22:20:00	1	0	1	0	CT	0	0	103	0	73	45	0	0	57	0	116	30	85	37	69	67	60	6	0	51	53	43	36	0	81	2	23	47	81	62	25	29	60	22
2149	5-Nov-21	22:25:00	1	0	1	0	CT	0	0	3	0	15	32	95	0	0	0	60	44	11	38	74	54	23	0	0	54	17	53	38	25	86	0	0	67	82	45	0	29	103	82
2150	5-Nov-21	22:30:00	1	0	1	0	CT	0	0	0	0	46	0	89	0	0	0	35	52	0	16	7	28	75	0	0	60	16	29	20	39	0	0	89	24	74	52	11	3	75	76
2151	5-Nov-21	22:35:00	1	0	1	0	CT	0	0	0	0	29	0	58	0	0	0	0	24	0	57	63	92	81	1	0	41	0	0	27	45	0	1	82	60	87	56	42	23	86	67
2152	5-Nov-21	22:40:00	1	0	1	0	CT	0	0	0	0	0	0	3	0	0	0	0	38	0	28	50	58	36	0	79	39	0	0	32	22	0	68	23	63	0	37	9	37	58	69
2153	5-Nov-21	22:45:00	1	0	1	0	CT	0	0	0	0	0	0	23	0	0	5	1	50	0	32	0	78	50	0	8	34	38	49	33	24	0	75	3	63	68	41	19	21	98	34
2154	5-Nov-21	22:50:00	1	0	1	0	CT	0	0	0	0	0	47	97	0	0	57	103	42	0	0	0	41	6	0	0	28	48	22	19	23	0	37	21	0	77	63	0	16	81	70
2155	5-Nov-21	22:55:00	1	0	1	0	CT	0	0	0	0	0	13	34	0	0	0	26	40	0	0	0	103	64	0	0	46	55	51	30	0	99	42	0	0	66	27	9	22	97	57
2156	5-Nov-21	23:00:00	1	0	1	0	CT	0	0	0	0	0	49	45	0	0	0	0	46	0	0	0	75	94	20	0	33	28	68	18	23	53	35	24	0	30	75	38	26	86	27
2157	5-Nov-21	23:05:00	1	0	1	0	CT	0	0	0	0	0	53	90	0	0	0	0	0	1	0	0	39	39	33	0	30	70	9	27	54	0	51	107	0	26	40	0	22	67	50
2158	5-Nov-21	23:10:00	1	0	1	0	CT	0	0	63	0	0	58	98	0	0	3	0	0	0	0	0	30	2	27	0	35	35	0	3	42	0	12	96	23	83	38	1	23	59	29
2159	5-Nov-21	23:15:00	1	0	1	0	CT	0	0	63	0	0	62	13	0	0	0	0	0	2	0	0	93	4	2	0	21	0	30	0	21	0	4	44	39	95	37	18	27	84	74
2160	5-Nov-21	23:20:00	1	0	1	0	CT	0	0	0	0	0	29	0	0	0	0	0	0	76	0	0	40	99	0	0	85	56	42	0	3	0	0	71	16	74	5	2	45	105	63
2161	5-Nov-21	23:25:00	1	0	1	0	CT	0	0	0	0	0	0	20	11	0	0	0	19	64	0	0	73	0	0	0	57	52	28	35	0	0	1	49	0	58	40	0	0	82	42
2162	5-Nov-21	23:30:00	1	0	1	0	CT	0	0	0	0	0	0	57	69	0	0	0	66	78	12	0	13	0	0	0	29	34	33	29	8	0	1	78	0	9	47	0	22	83	83
2163	5-Nov-21	23:35:00	1	0	1	0	CT	0	0	0	0	0	0	0	36	0	0	0	54	0	1	0	91	0	9	0	39	45	0	37	44	0	2	98	0	84	61	0	6	85	62
2164	5-Nov-21	23:40:00	1	0	1	0	CT	0	0	0	0	0	0	0	50	0	0	0	37	0	0	0	105	0	2	0	55	0	0	34	38	0	0	63	0	58	38	0	6	62	64
2165	5-Nov-21	23:45:00	1	0	1	0	CT	0	0	0	0	0	0	0	45	0	30	37	25	0	0	0	38	0	3	0	17	0	0	10	1	0	1	0	33	78	28	0	13	39	53
2166	5-Nov-21	23:50:00	1	0	1	0	CT	0	0	0	52	0	0	0	16	0	32	76	47	0	0	1	0	0	0	35	0	0	0	0	6	0	85	0	48	34	0	0	26	0	34
2167	5-Nov-21	23:55:00	1	0	1	0	CT	0	0	0	51	0	0	36	0	0	8	33	26	0	0	0	0	0	0	87	0	0	0	0	18	0	79	0	79	90	0	0	0	0	46
2168	6-Nov-21	0:00:00	1	0	1	0	CT	0	0	0	57	0	0	107	0	0	63	0	4	0	0	0	26	0	0	21	0	0	0	0	0	0	45	1	65	16	1	0	0	0	48
2169	6-Nov-21	0:05:00	1	0	1	0	CT	0	0	0	54	0	0	111	0	0	32	0	1	0	0	0	85	0	0	0	0	0	0	0	11	0	0	0	32	1	15	0	0	35	49
2170	6-Nov-21	0:10:00	1	0	1	0	CT	0	0	0	54	0	0	55	0	0	2	0	0	0	0	0	60	0	0	0	0	0	23	0	36	0	0	0	15	0	18	0	16	28	10
2171	6-Nov-21	0:15:00	1	0	1	0	CT	0	0	0	19	0	0	43	0	0	2	0	0	0	0	0	45	0	0	0	0	0	57	0	37	0	0	0	11	0	48	0	31	0	55
2172	6-Nov-21	0:20:00	1	0	1	0	CT	0	0	52	0	0	0	0	0	0	0	1	0	0	0	0	5	0	0	0	0	0	49	0	27	0	0	0	0	4	0	0	41	0	78
2173	6-Nov-21	0:25:00	1	0	1	0	CT	0	0	90	0	0	0	0	0	0	43	0	0	0	0	14	0	0	0	0	0	0	15	0	0	0	0	0	0	48	0	0	22	0	39
2174	6-Nov-21	0:30:00	1	0	1	0	CT	0	0	84	0	0	0	0	0	0	63	0	0	0	0	0	0	0	0	0	0	0	0	0	0	0	0	0	0	91	0	0	0	0	72
2175	6-Nov-21	0:35:00	1	0	1	0	CT	0	0	27	0	0	0	0	0	0	63	0	2	0	0	1	0	0	0	0	0	0	67	0	0	0	0	0	0	49	0	0	0	0	37
2176	6-Nov-21	0:40:00	1	0	1	0	CT	0	0	0	0	0	0	0	0	0	32	0	1	0	0	0	0	0	0	1	0	0	26	0	0	0	0	0	0	65	0	0	0	0	0
2177	6-Nov-21	0:45:00	1	0	1	0	CT	0	0	0	0	0	0	0	0	0	0	0	0	0	0	1	0	0	0	0	0	0	63	0	0	0	0	0	0	54	0	0	0	0	75
2178	6-Nov-21	0:50:00	1	0	1	0	CT	0	0	0	0	0	0	0	0	0	18	0	0	0	0	0	0	0	0	1	0	0	63	0	0	0	0	0	0	18	0	0	0	0	59
2179	6-Nov-21	0:55:00	1	0	1	0	CT	0	0	0	0	0	0	0	0	0	0	86	1	0	0	0	0	0	0	0	0	0	0	0	6	0	0	3	0	0	12	0	26	0	31
2180	6-Nov-21	1:00:00	1	0	1	0	CT	0	0	0	0	0	0	0	0	0	0	68	0	0	0	3	0	0	0	0	0	0	0	0	28	0	0	6	18	0	71	0	23	0	0
2181	6-Nov-21	1:05:00	1	0	1	0	CT	0	0	0	0	0	0	0	0	0	0	73	0	0	0	0	0	0	0	0	0	0	0	0	2	0	0	0	63	0	56	0	2	0	43
2182	6-Nov-21	1:10:00	1	0	1	0	CT	0	0	0	0	0	0	0	0	0	0	0	0	0	0	0	0	0	0	0	0	0	0	0	0	0	0	0	0	0	0	0	0	0	35
2183	6-Nov-21	1:15:00	1	0	1	0	CT	0	0	0	0	0	0	0	2	0	0	0	0	0	0	0	0	0	0	0	0	0	0	0	0	0	0	0	0	0	0	0	0	0	0
2184	6-Nov-21	1:20:00	1	0	1	0	CT	0	0	0	0	0	0	0	0	0	0	10	0	0	0	3	0	0	29	3	0	0	0	0	0	0	0	0	0	0	0	0	0	0	0
2185	6-Nov-21	1:25:00	1	0	1	0	CT	0	0	0	0	0	0	0	10	0	11	1	0	0	0	0	0	0	0	0	0	0	0	0	0	0	0	0	0	0	0	0	0	0	0
2186	6-Nov-21	1:30:00	1	0	1	0	CT	0	0	0	0	0	0	0	63	0	22	0	0	0	0	0	0	0	0	0	0	0	0	0	0	0	0	0	0	0	0	0	0	0	0
2187	6-Nov-21	1:35:00	1	0	1	0	CT	0	0	0	0	0	0	0	44	0	16	0	0	0	0	0	0	0	0	0	0	0	0	0	0	0	0	0	0	0	0	0	0	0	0
2188	6-Nov-21	1:40:00	1	0	1	0	CT	0	0	0	0	0	0	0	15	0	11	0	0	0	0	0	0	0	0	0	0	0	0	0	0	0	0	0	0	0	0	0	0	0	0
2189	6-Nov-21	1:45:00	1	0	1	0	CT	0	0	0	0	0	0	0	0	0	0	0	0	0	0	17	0	0	0	0	0	0	0	0	0	0	0	0	0	0	0	0	0	0	0
2190	6-Nov-21	1:50:00	1	0	1	0	CT	0	0	0	0	0	0	0	0	0	0	0	0	0	0	0	0	0	0	0	0	0	0	0	0	0	0	0	0	0	0	0	14	0	0
2191	6-Nov-21	1:55:00	1	0	1	0	CT	0	0	0	0	0	0	0	0	0	0	0	0	0	0	0	0	0	0	0	0	0	0	0	0	0	0	0	0	0	0	0	0	0	0
2192	6-Nov-21	2:00:00	1	0	1	0	CT	0	0	0	0	0	0	0	0	0	0	0	0	0	0	0	0	0	0	0	0	0	0	0	0	0	0	0	0	0	0	0	0	0	1
2193	6-Nov-21	2:05:00	1	0	1	0	CT	0	0	16	0	0	0	0	0	0	0	0	0	0	0	0	0	0	0	0	0	0	0	0	0	0	0	3	3	0	0	0	0	0	0
2194	6-Nov-21	2:10:00	1	0	1	0	CT	0	0	8	0	0	0	0	0	0	0	37	0	0	0	26	0	0	0	0	0	0	0	0	0	0	0	0	0	0	0	0	0	0	0
2195	6-Nov-21	2:15:00	1	0	1	0	CT	0	0	0	0	0	0	0	0	0	0	0	2	0	0	0	0	0	0	0	0	0	0	0	0	0	0	0	0	0	0	0	0	2	10
2196	6-Nov-21	2:20:00	1	0	1	0	CT	0	0	0	0	0	0	0	0	0	0	22	0	0	0	0	0	0	0	1	0	0	0	0	0	0	0	0	0	0	0	0	0	54	31
2197	6-Nov-21	2:25:00	1	0	1	0	CT	0	0	8	0	0	0	0	0	0	0	0	0	0	0	0	0	0	0	24	2	0	0	0	0	0	0	0	0	0	0	0	0	6	0
2198	6-Nov-21	2:30:00	1	0	1	0	CT	0	0	0	0	0	0	0	0	0	0	0	2	0	0	0	0	0	0	9	0	0	0	0	0	0	0	52	0	0	0	0	0	0	0
2199	6-Nov-21	2:35:00	1	0	1	0	CT	0	0	0	0	0	2	0	0	0	6	0	1	0	0	0	0	0	0	0	0	0	0	0	0	0	0	100	0	0	0	0	0	0	0
2200	6-Nov-21	2:40:00	1	0	1	0	CT	0	0	0	0	0	8	0	0	0	7	0	5	0	0	0	0	0	0	0	0	0	0	0	0	0	0	50	0	0	0	0	0	0	0
2201	6-Nov-21	2:45:00	1	0	1	0	CT	0	0	0	0	0	0	0	0	0	15	0	0	0	0	0	0	0	0	0	0	0	0	0	0	0	0	109	0	0	0	0	0	0	0
2202	6-Nov-21	2:50:00	1	0	1	0	CT	0	0	0	0	0	0	73	0	0	38	0	0	0	0	0	0	0	0	0	0	0	1	0	0	0	0	100	1	0	0	0	0	0	0
2203	6-Nov-21	2:55:00	1	0	1	0	CT	0	0	0	0	0	0	115	0	0	0	0	0	0	0	0	0	0	0	0	0	0	0	0	0	0	0	63	62	0	0	0	0	0	0
2204	6-Nov-21	3:00:00	1	0	1	0	CT	0	0	0	0	0	0	87	0	0	0	0	0	0	0	2	0	0	0	0	0	0	0	0	0	0	0	55	0	0	13	0	0	0	0
2205	6-Nov-21	3:05:00	1	0	1	0	CT	0	0	0	0	0	0	45	0	0	0	0	0	0	0	1	0	0	12	0	0	0	0	0	0	0	0	0	0	0	50	0	0	0	0
2206	6-Nov-21	3:10:00	1	0	1	0	CT	0	0	0	0	0	0	0	0	0	0	0	0	0	0	1	0	0	51	0	0	0	0	0	0	0	0	0	0	0	2	0	0	0	0
2207	6-Nov-21	3:15:00	1	0	1	0	CT	0	0	0	0	0	0	0	0	0	0	6	0	0	0	0	0	0	12	0	0	0	0	0	0	0	0	0	0	0	1	0	0	0	0
2208	6-Nov-21	3:20:00	1	0	1	0	CT	0	0	0	0	0	0	0	0	0	0	1	1	0	0	0	0	0	8	0	0	0	0	0	0	0	0	0	0	0	0	0	3	0	0
2209	6-Nov-21	3:25:00	1	0	1	0	CT	0	0	0	0	0	0	0	0	0	0	1	12	0	0	0	0	0	2	0	0	0	0	0	0	0	0	0	0	0	0	0	0	0	40
2210	6-Nov-21	3:30:00	1	0	1	0	CT	0	0	0	0	0	0	0	0	0	2	0	0	0	0	0	0	0	0	0	0	0	0	0	0	0	0	0	0	0	2	0	0	0	32
2211	6-Nov-21	3:35:00	1	0	1	0	CT	0	0	0	0	0	0	0	0	0	0	0	0	0	0	0	0	0	0	0	0	0	0	0	0	0	0	0	1	0	0	0	0	0	33
2212	6-Nov-21	3:40:00	1	0	1	0	CT	0	0	0	0	0	0	0	0	0	63	0	0	0	0	0	0	0	0	0	0	0	19	0	2	0	0	0	0	0	0	0	0	0	0
2213	6-Nov-21	3:45:00	1	0	1	0	CT	0	0	0	0	0	0	0	0	0	19	5	0	0	0	0	0	0	0	0	0	0	3	0	4	0	1	0	0	0	1	0	0	0	0
2214	6-Nov-21	3:50:00	1	0	1	0	CT	0	0	0	0	0	0	0	0	0	0	0	0	0	0	0	0	0	0	0	0	0	0	0	0	0	0	0	0	0	0	0	0	0	0
2215	6-Nov-21	3:55:00	1	0	1	0	CT	0	0	1	0	0	0	0	0	0	2	1	0	0	0	0	0	0	0	0	0	0	0	0	0	0	0	0	0	0	0	0	0	0	0
2216	6-Nov-21	4:00:00	1	0	1	0	CT	0	0	0	0	0	9	0	0	0	1	0	0	0	0	0	0	0	0	0	0	0	0	0	0	0	0	0	0	0	0	0	0	0	1
2217	6-Nov-21	4:05:00	1	0	1	0	CT	0	0	0	0	0	47	0	0	0	1	0	0	0	0	0	0	0	0	0	0	0	0	0	0	0	0	0	0	0	0	0	0	0	0
2218	6-Nov-21	4:10:00	1	0	1	0	CT	0	0	0	0	0	0	0	0	0	0	85	0	0	0	0	0	0	0	0	0	0	0	0	0	0	0	0	1	0	1	0	0	0	0
2219	6-Nov-21	4:15:00	1	0	1	0	CT	0	1	35	11	1	9	23	12	31	25	80	15	22	1	17	18	12	21	28	11	47	11	12	12	57	30	30	21	51	45	5	27	95	42
2220	6-Nov-21	4:20:00	1	0	1	0	CT	0	1	4	22	11	24	79	0	19	30	56	35	13	1	30	34	3	27	50	5	67	6	64	27	69	26	80	1	39	46	7	19	113	0
2221	6-Nov-21	4:25:00	1	0	1	0	CT	0	1	3	0	39	31	0	0	2	55	74	16	67	10	9	4	26	8	21	4	10	6	21	0	45	2	45	5	60	36	20	18	57	19
2222	6-Nov-21	4:30:00	1	0	1	0	CT	0	1	69	25	0	59	0	0	1	54	0	4	35	13	4	15	66	18	1	3	42	2	0	46	38	2	21	29	37	39	28	23	30	0
2223	6-Nov-21	4:35:00	1	0	1	0	CT	0	1	121	27	0	61	0	11	5	10	0	18	53	10	7	24	75	50	0	8	12	0	12	25	23	1	13	9	40	19	0	16	18	0
2224	6-Nov-21	4:40:00	1	0	1	0	CT	0	1	94	46	0	47	0	32	5	55	0	44	91	3	12	12	52	19	2	4	14	3	13	45	60	15	80	35	27	15	27	24	57	10
2225	6-Nov-21	4:45:00	1	0	1	0	CT	0	1	116	29	0	63	0	53	0	0	49	15	72	5	25	29	0	27	0	9	11	10	11	79	18	9	79	5	36	22	24	15	52	55
2226	6-Nov-21	4:50:00	1	0	1	0	CT	0	1	95	49	0	57	31	69	10	63	78	0	57	0	21	2	58	0	33	19	23	17	8	40	21	15	73	25	42	22	13	21	48	63
2227	6-Nov-21	4:55:00	1	0	1	0	CT	0	1	0	25	0	44	82	33	7	1	0	0	73	5	19	0	100	0	4	11	36	5	10	39	8	13	82	11	29	23	8	14	33	11
2228	6-Nov-21	5:00:00	1	0	1	0	CT	0	1	0	36	0	17	61	28	20	0	0	47	48	3	17	12	54	0	41	17	55	7	7	57	28	6	68	15	24	25	16	12	39	3
2229	6-Nov-21	5:05:00	1	0	1	0	CT	0	1	0	54	89	0	93	33	15	4	0	51	78	1	22	47	20	0	7	17	88	0	7	71	16	6	44	9	38	15	5	26	93	16
2230	6-Nov-21	5:10:00	1	0	1	0	CT	0	1	6	9	83	32	27	0	21	43	0	9	45	0	60	39	0	23	0	1	78	0	24	35	31	12	0	16	34	30	5	60	107	12
2231	6-Nov-21	5:15:00	1	0	1	0	CT	0	1	4	0	66	87	0	0	4	39	0	0	80	0	29	52	1	63	0	17	40	0	9	21	24	7	0	9	21	25	0	37	97	8
2232	6-Nov-21	5:20:00	1	0	1	0	CT	0	1	0	0	0	46	0	0	8	0	12	0	26	0	21	11	6	24	31	20	68	1	26	12	0	0	1	6	37	15	3	5	52	14
2233	6-Nov-21	5:25:00	1	0	1	0	CT	0	1	1	0	0	0	0	0	6	0	16	0	0	0	21	0	1	20	11	18	76	0	17	15	9	0	6	13	30	20	15	34	61	5
2234	6-Nov-21	5:30:00	1	0	1	0	CT	0	1	0	0	0	0	0	0	11	9	92	0	0	1	35	0	1	4	23	5	15	3	15	13	23	13	0	13	46	14	5	46	88	1
2235	6-Nov-21	5:35:00	1	0	1	0	CT	0	1	0	0	0	41	2	0	17	81	70	0	0	4	27	0	55	7	13	13	38	0	47	27	3	15	0	13	57	16	29	31	55	9
2236	6-Nov-21	5:40:00	1	0	1	0	CT	0	1	72	0	10	82	75	29	11	56	61	0	0	0	55	1	63	36	26	7	61	7	70	41	17	12	0	13	33	23	41	58	66	73
2237	6-Nov-21	5:45:00	1	0	1	0	CT	0	1	82	0	0	32	84	46	22	46	0	24	0	1	27	49	58	0	17	0	44	12	31	57	2	16	0	8	57	25	12	35	44	52
2238	6-Nov-21	5:50:00	1	0	1	0	CT	0	1	105	0	0	46	43	30	19	41	0	1	0	1	18	44	23	20	33	12	58	6	25	24	65	5	0	14	31	21	46	41	68	51
2239	6-Nov-21	5:55:00	1	0	1	0	CT	0	1	93	19	0	8	7	6	10	33	0	15	68	1	10	28	0	63	81	9	36	5	42	45	66	13	0	12	30	16	47	24	68	16
2240	6-Nov-21	6:00:00	1	0	1	0	CT	0	1	87	39	0	0	13	0	26	7	0	0	70	0	4	58	79	26	59	10	15	4	32	41	63	13	25	18	21	24	30	28	49	11
2241	6-Nov-21	6:05:00	1	0	1	0	CT	0	1	74	18	2	0	4	0	12	2	0	0	82	3	46	46	25	13	34	7	0	0	13	41	73	10	104	6	64	0	21	29	71	1
2242	6-Nov-21	6:10:00	1	0	1	0	CT	0	1	0	22	0	0	0	0	17	0	0	0	5	13	37	14	33	13	2	9	4	3	14	33	73	13	75	28	24	6	23	15	54	35
2243	6-Nov-21	6:15:00	1	0	1	0	CT	0	1	5	0	88	0	0	0	24	4	0	0	20	8	73	1	64	16	61	7	0	0	35	6	55	6	123	14	33	54	50	18	70	23
2244	6-Nov-21	6:20:00	1	0	1	0	CT	0	1	2	0	61	0	0	0	16	48	0	0	64	21	39	30	92	0	83	16	0	10	15	12	33	7	59	4	69	15	7	12	71	9
2245	6-Nov-21	6:25:00	1	0	1	0	CT	0	1	0	0	0	64	64	0	17	31	0	0	38	7	44	51	21	0	62	19	9	11	8	10	82	18	44	12	89	20	41	19	21	6
2246	6-Nov-21	6:30:00	1	0	1	0	CT	0	1	0	0	27	60	91	0	0	8	0	16	3	2	17	30	0	0	41	15	20	19	20	10	28	22	64	22	128	17	54	4	38	13
2247	6-Nov-21	6:35:00	1	0	1	0	CT	0	1	0	0	74	24	27	0	5	1	0	22	52	17	50	57	0	0	80	9	16	25	41	0	34	18	49	21	57	17	47	47	57	12
2248	6-Nov-21	6:40:00	1	0	1	0	CT	0	1	2	12	57	0	54	42	30	3	84	18	71	6	53	13	0	13	73	45	11	30	47	0	44	24	31	25	27	19	16	26	52	14
2249	6-Nov-21	6:45:00	1	0	1	0	CT	0	1	2	25	21	0	4	10	23	22	76	25	41	7	48	0	0	9	45	9	7	34	27	0	37	27	1	12	50	19	48	38	40	9
2250	6-Nov-21	6:50:00	1	0	1	0	CT	0	1	89	0	1	0	8	5	16	72	15	6	3	20	51	0	0	23	73	35	5	31	10	0	57	52	0	10	29	21	53	34	75	13
2251	6-Nov-21	6:55:00	1	0	1	0	CT	0	1	114	3	0	0	2	1	16	26	3	16	6	11	35	3	41	63	65	7	34	25	6	2	11	32	21	15	18	22	48	23	64	11
2252	6-Nov-21	7:00:00	1	0	1	0	CT	0	1	79	20	0	2	6	2	35	25	0	67	0	0	62	14	92	63	19	18	0	26	26	29	30	43	8	5	65	22	41	21	47	10
2253	6-Nov-21	7:05:00	1	0	1	0	CT	0	1	95	9	20	5	3	1	11	21	0	76	4	0	29	35	33	40	70	11	5	39	67	57	67	26	0	13	50	39	68	8	65	9
2254	6-Nov-21	7:10:00	1	0	1	0	CT	0	1	109	0	30	40	66	0	35	69	3	58	0	9	19	26	23	0	37	12	2	36	28	78	79	30	0	11	83	39	50	15	45	14
2255	6-Nov-21	7:15:00	1	0	1	0	CT	0	1	123	0	21	45	4	3	63	10	65	4	14	16	2	9	42	3	0	2	45	25	20	68	46	15	0	31	78	34	57	1	79	8
2256	6-Nov-21	7:20:00	1	0	1	0	CT	0	1	84	3	1	14	1	1	125	0	31	0	20	5	27	45	68	9	0	8	48	26	0	83	65	38	0	38	66	27	8	24	8	16
2257	6-Nov-21	7:25:00	1	0	1	0	CT	0	1	0	0	17	19	16	5	112	0	63	0	6	9	21	40	55	45	0	9	10	27	17	32	91	9	0	28	37	38	59	0	84	10
2258	6-Nov-21	7:30:00	1	0	1	0	CT	0	1	27	3	19	14	65	0	97	0	11	0	0	7	41	37	32	69	0	5	19	38	68	55	59	17	0	29	35	32	43	19	73	6
2259	6-Nov-21	7:35:00	1	0	1	0	CT	0	1	2	19	13	23	24	0	98	0	28	0	2	6	65	26	31	3	4	13	13	29	28	27	66	32	0	24	95	30	6	25	58	23
2260	6-Nov-21	7:40:00	1	0	1	0	CT	0	1	0	10	0	7	4	0	18	0	1	0	20	9	48	28	0	18	83	22	9	34	29	33	49	25	63	33	65	54	30	23	52	8
2261	6-Nov-21	7:45:00	1	0	1	0	CT	0	1	0	11	20	4	0	1	10	0	0	0	15	3	46	45	25	14	60	20	9	61	10	8	49	23	23	41	79	27	53	40	19	9
2262	6-Nov-21	7:50:00	1	0	1	0	CT	0	1	0	45	5	8	0	9	26	20	0	0	14	0	85	25	2	2	49	11	36	9	34	0	61	18	45	25	65	28	65	39	49	25
2263	6-Nov-21	7:55:00	1	0	1	0	CT	0	1	0	37	4	9	0	4	22	0	2	0	14	9	58	29	39	0	59	9	66	32	31	40	37	21	44	27	48	52	60	20	50	11
2264	6-Nov-21	8:00:00	1	0	1	0	CT	0	1	44	29	10	10	3	0	25	0	45	0	57	6	59	22	56	0	53	21	15	39	27	54	41	18	74	22	33	52	49	34	69	22
2265	6-Nov-21	8:05:00	1	0	1	0	CT	0	1	96	36	14	7	11	5	17	28	66	0	42	0	38	2	53	6	60	16	20	41	2	38	41	12	39	22	5	21	29	23	53	13
2266	6-Nov-21	8:10:00	1	0	1	0	CT	0	1	75	22	18	9	8	0	20	50	49	17	2	0	16	3	47	67	3	14	7	10	7	24	26	10	78	39	19	18	32	21	83	12
2267	6-Nov-21	8:15:00	1	0	1	0	CT	0	1	78	2	14	16	13	2	18	17	79	72	0	11	47	20	5	14	44	14	50	42	39	18	60	22	12	38	19	31	32	21	59	15
2268	6-Nov-21	8:20:00	1	0	1	0	CT	0	1	97	33	6	12	5	0	12	0	43	28	11	4	8	42	0	8	65	16	25	25	21	38	58	31	3	13	62	36	50	33	60	17
2269	6-Nov-21	8:25:00	1	0	1	0	CT	0	1	63	31	19	12	0	0	15	0	73	28	0	16	37	37	3	30	33	9	0	39	23	45	29	20	0	55	58	51	18	35	27	13
2270	6-Nov-21	8:30:00	1	0	1	0	CT	0	1	4	1	14	6	12	0	16	60	61	24	4	9	41	50	3	8	2	16	15	27	33	61	28	32	0	24	39	71	37	35	35	22
2271	6-Nov-21	8:35:00	1	0	1	0	CT	0	1	77	8	1	8	46	0	11	13	33	34	16	14	64	56	0	18	57	12	15	23	63	41	63	30	0	31	46	18	25	60	50	15
2272	6-Nov-21	8:40:00	1	0	1	0	CT	0	1	92	8	0	12	8	62	13	34	0	16	10	31	26	13	38	16	0	12	12	19	26	78	45	43	2	24	59	31	36	23	53	5
2273	6-Nov-21	8:45:00	1	0	1	0	CT	0	1	44	2	2	17	5	6	17	14	10	22	3	33	44	35	79	20	0	16	5	8	22	30	45	28	61	17	27	46	50	27	77	3
2274	6-Nov-21	8:50:00	1	0	1	0	CT	0	1	1	4	20	10	4	86	26	0	38	27	11	36	45	1	96	12	0	49	15	7	33	8	33	21	29	31	28	37	51	35	46	9
2275	6-Nov-21	8:55:00	1	0	1	0	CT	0	1	3	12	9	7	0	31	19	47	53	24	14	20	35	9	32	36	15	7	3	66	28	22	31	20	75	54	35	13	56	38	33	31
2276	6-Nov-21	9:00:00	1	0	1	0	CT	0	1	9	4	25	13	1	33	11	32	32	2	13	40	54	11	28	5	75	14	1	50	33	42	34	22	17	16	19	24	37	28	54	42
2277	6-Nov-21	9:05:00	1	0	1	0	CT	0	1	13	22	28	13	4	9	38	0	34	0	14	19	52	30	42	16	67	16	0	45	12	27	39	27	65	94	10	62	29	12	44	34
2278	6-Nov-21	9:10:00	1	0	1	0	CT	0	1	113	48	19	3	0	0	34	41	7	0	24	28	73	35	26	10	18	13	9	8	41	24	49	45	43	37	39	28	27	22	31	9
2279	6-Nov-21	9:15:00	1	0	1	0	CT	0	1	91	27	49	12	38	0	107	35	9	21	62	0	63	45	31	6	71	12	48	2	30	5	45	26	80	7	45	6	8	25	41	5
2280	6-Nov-21	9:20:00	1	0	1	0	CT	0	1	71	21	56	19	31	0	59	38	14	22	50	6	52	45	55	10	53	15	19	5	5	16	48	41	45	8	88	37	85	22	32	8
2281	6-Nov-21	9:25:00	1	0	1	0	CT	0	1	79	46	22	12	13	0	5	41	28	35	46	4	23	43	36	68	9	18	21	44	24	12	74	29	73	29	56	36	48	34	38	14
2282	6-Nov-21	9:30:00	1	0	1	0	CT	0	1	83	13	10	9	38	0	7	3	51	26	31	0	45	54	0	24	0	11	36	43	40	24	40	36	45	8	30	21	48	17	49	9
2283	6-Nov-21	9:35:00	1	0	1	0	CT	0	1	56	4	2	11	6	0	27	0	74	21	10	0	45	16	6	0	0	4	51	28	21	65	47	13	5	13	41	41	35	21	50	16
2284	6-Nov-21	9:40:00	1	0	1	0	CT	0	1	88	2	33	21	17	0	18	7	15	29	2	9	38	18	25	0	0	15	22	40	9	28	92	14	39	7	27	34	59	31	11	12
2285	6-Nov-21	9:45:00	1	0	1	0	CT	0	1	99	12	80	20	10	0	6	0	0	25	17	2	30	30	34	26	0	22	11	35	28	30	56	15	41	12	69	24	94	26	55	9
2286	6-Nov-21	9:50:00	1	0	1	0	CT	0	1	39	14	82	13	1	0	8	0	0	6	14	34	41	20	35	0	0	11	2	1	77	48	49	2	67	18	74	20	43	24	26	11
2287	6-Nov-21	9:55:00	1	0	1	0	CT	0	1	42	5	31	6	0	0	7	28	0	39	10	42	29	63	105	8	5	12	4	27	16	28	35	12	51	1	56	40	60	18	42	20
2288	6-Nov-21	10:00:00	1	0	1	0	CT	0	1	73	13	15	33	3	0	31	53	0	59	10	21	19	16	27	27	58	67	8	45	28	42	56	10	96	11	44	31	4	25	36	13
2289	6-Nov-21	10:05:00	1	0	1	0	CT	0	1	17	61	14	7	6	0	38	5	0	1	12	32	13	29	24	1	100	30	10	16	38	61	59	15	20	6	14	22	55	17	22	9
2290	6-Nov-21	10:10:00	1	0	1	0	CT	0	1	2	41	10	12	30	0	9	39	0	21	15	23	69	29	21	11	19	35	2	46	6	42	76	10	15	15	62	22	51	26	33	20
2291	6-Nov-21	10:15:00	1	0	1	0	CT	0	1	52	51	0	10	46	0	23	15	0	16	8	12	42	9	5	0	66	13	17	10	14	33	44	10	52	42	54	9	61	16	41	24
2292	6-Nov-21	10:20:00	1	0	1	0	CT	0	1	54	28	0	39	13	0	8	0	4	0	3	31	23	20	53	0	68	10	44	42	26	23	57	10	71	44	29	44	59	15	18	9
2293	6-Nov-21	10:25:00	1	0	1	0	CT	0	1	89	0	1	25	11	0	15	16	38	5	23	14	5	51	9	5	54	19	63	52	19	7	66	18	6	36	33	22	48	10	29	25
2294	6-Nov-21	10:30:00	1	0	1	0	CT	0	1	84	0	11	9	8	0	10	34	62	45	11	7	33	30	6	10	82	9	77	15	46	0	74	5	0	13	20	29	32	28	14	22
2295	6-Nov-21	10:35:00	1	0	1	0	CT	0	1	61	0	21	10	0	0	12	0	56	16	13	0	31	14	12	65	10	10	71	3	4	5	45	19	0	17	64	32	58	4	34	16
2296	6-Nov-21	10:40:00	1	0	1	0	CT	0	1	80	0	17	54	13	0	26	0	27	3	14	0	90	33	32	45	0	17	9	33	49	2	38	12	44	27	37	13	46	23	29	22
2297	6-Nov-21	10:45:00	1	0	1	0	CT	0	1	74	0	18	31	23	0	44	31	0	25	10	0	40	25	38	22	27	21	6	19	42	14	74	5	38	36	48	10	32	30	36	21
2298	6-Nov-21	10:50:00	1	0	1	0	CT	0	1	2	6	11	27	6	0	54	32	0	0	7	0	45	26	48	16	48	11	3	44	38	59	71	11	70	15	71	27	44	19	29	19
2299	6-Nov-21	10:55:00	1	0	1	0	CT	0	1	59	19	26	57	16	7	79	45	37	11	38	2	50	14	47	20	57	21	36	22	36	36	36	33	32	35	71	41	43	34	54	27
2300	6-Nov-21	11:00:00	1	0	1	0	CT	0	1	112	33	68	38	39	21	30	8	90	17	22	34	63	21	56	4	57	20	38	24	56	34	33	32	55	32	49	32	72	30	40	37
2301	6-Nov-21	11:05:00	1	0	1	0	CT	0	1	15	30	60	45	71	16	31	34	61	22	16	42	23	10	63	23	61	14	38	7	22	36	34	18	27	13	52	22	99	43	33	43
2302	6-Nov-21	11:10:00	1	0	1	0	CT	0	1	29	43	47	20	21	40	33	7	71	14	24	19	50	24	33	6	58	38	39	31	51	57	43	10	36	14	102	25	36	35	51	24
2303	6-Nov-21	11:15:00	1	0	1	0	CT	0	1	75	23	37	29	4	28	22	3	63	4	13	6	76	23	40	15	23	22	21	36	24	4	37	6	2	59	64	17	44	38	23	47
2304	6-Nov-21	11:20:00	1	0	1	0	CT	0	1	71	29	20	28	21	12	21	44	61	13	15	9	27	20	45	67	44	11	35	29	25	4	41	18	29	48	34	16	54	24	38	43
2305	6-Nov-21	11:25:00	1	0	1	0	CT	0	1	63	9	1	13	36	0	22	24	66	23	10	5	14	19	9	0	0	14	23	25	6	70	53	9	61	18	15	29	64	33	25	19
2306	6-Nov-21	11:30:00	1	0	1	0	CT	0	1	105	2	2	12	1	0	22	23	48	21	17	3	33	15	2	3	13	21	25	1	22	48	56	11	73	8	34	28	79	21	27	14
2307	6-Nov-21	11:35:00	1	0	1	0	CT	0	1	34	6	33	36	5	8	26	76	0	4	19	5	53	8	1	67	82	13	12	7	41	17	35	21	9	2	61	14	37	21	30	21
2308	6-Nov-21	11:40:00	1	0	1	0	CT	0	1	0	13	30	11	7	1	17	5	0	16	9	6	36	27	1	5	75	18	11	0	29	21	59	27	5	18	42	41	43	30	23	13
2309	6-Nov-21	11:45:00	1	0	1	0	CT	0	1	43	6	13	11	23	1	19	6	0	30	28	7	12	25	0	22	58	16	4	0	44	33	56	20	1	35	37	29	57	23	17	17
2310	6-Nov-21	11:50:00	1	0	1	0	CT	0	1	9	14	36	14	6	0	23	6	12	12	19	1	39	24	23	63	54	8	8	0	17	15	48	29	11	16	25	22	74	26	25	12
2311	6-Nov-21	11:55:00	1	0	1	0	CT	0	1	32	10	24	10	10	2	18	50	26	21	13	18	31	19	55	4	95	9	0	12	47	38	77	21	0	20	59	26	23	26	27	10
2312	6-Nov-21	12:00:00	1	0	1	0	CT	0	1	36	17	20	8	0	34	22	48	45	33	0	46	25	17	14	5	30	22	12	19	53	42	43	26	0	15	103	33	73	38	31	10
2313	6-Nov-21	12:05:00	1	0	1	0	CT	0	1	29	10	1	17	0	4	21	1	53	3	3	40	63	27	34	11	18	33	15	6	23	58	55	11	18	13	58	29	50	29	30	13
2314	6-Nov-21	12:10:00	1	0	1	0	CT	0	1	40	4	30	42	17	0	18	0	51	0	7	1	30	32	54	5	75	19	5	0	33	6	34	31	45	22	47	34	55	8	26	11
2315	6-Nov-21	12:15:00	1	0	1	0	CT	0	1	41	37	9	2	61	0	24	1	23	2	7	3	4	9	58	1	25	2	6	16	6	0	40	6	29	68	15	6	22	20	12	6
2316	6-Nov-21	12:20:00	1	0	1	0	CT	0	0	0	63	0	0	63	0	37	0	0	1	0	0	47	0	63	0	0	1	0	5	0	2	19	0	3	63	0	0	0	7	0	1
2317	6-Nov-21	12:25:00	1	0	1	0	CT	0	0	0	0	0	0	1	7	0	0	0	0	0	0	1	0	3	0	0	0	0	35	0	0	14	0	25	2	6	0	0	1	0	20
2318	6-Nov-21	12:30:00	1	0	1	0	CT	0	0	0	0	0	0	0	90	0	0	0	0	0	58	4	0	2	3	0	0	0	63	0	0	2	0	0	1	12	0	0	0	0	1
2319	6-Nov-21	12:35:00	1	0	1	0	CT	0	0	0	13	0	0	0	61	0	0	0	0	4	39	0	0	2	0	41	2	0	2	0	3	2	0	0	0	28	0	0	0	8	1
2320	6-Nov-21	12:40:00	1	0	1	0	CT	0	0	0	54	0	0	0	49	0	0	0	0	0	0	1	0	32	1	93	21	0	1	0	0	16	0	0	0	103	1	0	0	114	2
2321	6-Nov-21	12:45:00	1	0	1	0	CT	0	0	0	52	0	0	0	28	0	0	0	1	0	0	0	0	88	5	1	10	0	1	0	0	7	0	0	0	28	0	0	1	95	13
2322	6-Nov-21	12:50:00	1	0	1	0	CT	0	0	0	42	0	0	60	0	0	0	0	0	0	1	1	0	90	63	8	0	0	0	0	0	0	0	0	0	0	4	0	0	94	1
2323	6-Nov-21	12:55:00	1	0	1	0	CT	0	0	0	0	0	0	117	41	0	0	0	0	3	0	0	0	91	0	0	0	2	7	0	1	73	0	0	0	0	0	0	8	106	0
2324	6-Nov-21	13:00:00	1	0	1	0	CT	0	0	0	0	0	0	93	65	0	0	0	25	0	10	0	0	79	63	1	0	2	0	0	0	97	0	3	36	0	0	0	4	63	0
2325	6-Nov-21	13:05:00	1	0	1	0	CT	0	0	0	0	0	0	97	42	0	0	0	1	0	12	0	0	5	0	4	2	0	74	0	0	87	0	0	6	0	0	0	6	0	63
2326	6-Nov-21	13:10:00	1	0	1	0	CT	0	0	0	0	0	0	81	28	0	0	0	0	0	30	0	0	68	2	0	0	0	16	0	3	98	0	0	0	0	0	0	0	58	83
2327	6-Nov-21	13:15:00	1	0	1	0	CT	0	0	0	0	0	0	32	0	0	0	0	75	0	0	0	0	106	2	37	0	5	72	0	0	63	0	0	0	0	0	0	14	101	22
2328	6-Nov-21	13:20:00	1	0	1	0	CT	0	0	0	66	0	0	103	0	0	0	0	92	1	33	0	0	63	0	97	1	0	81	0	0	63	0	0	0	0	0	0	3	94	0
2329	6-Nov-21	13:25:00	1	0	1	0	CT	0	0	0	34	0	33	58	0	0	0	0	55	0	52	0	0	0	0	30	5	0	79	0	0	18	0	0	0	0	1	0	0	31	0
2330	6-Nov-21	13:30:00	1	0	1	0	CT	0	0	55	5	0	54	61	16	0	0	0	66	4	18	2	0	0	0	0	0	0	25	0	0	0	0	0	0	59	0	0	0	35	0
2331	6-Nov-21	13:35:00	1	0	1	0	CT	0	0	8	0	0	51	91	52	0	0	0	71	3	0	0	0	8	0	0	0	15	0	0	0	0	0	0	0	86	0	0	1	88	0
2332	6-Nov-21	13:40:00	1	0	1	0	CT	0	0	0	0	0	57	76	46	0	0	16	34	0	0	0	0	62	0	0	0	0	0	0	0	101	0	0	23	21	1	0	0	28	0
2333	6-Nov-21	13:45:00	1	0	1	0	CT	0	0	0	0	0	0	60	5	71	0	111	0	0	0	0	0	58	19	0	0	0	31	0	0	53	0	74	87	63	0	0	5	0	0
2334	6-Nov-21	13:50:00	1	0	1	0	CT	0	0	12	0	0	0	0	0	98	0	99	0	0	0	0	0	38	63	3	41	0	49	0	10	74	0	78	52	3	0	0	4	63	23
2335	6-Nov-21	13:55:00	1	0	1	0	CT	0	0	0	0	0	0	1	0	95	0	1	0	0	0	45	0	1	63	80	70	2	50	0	2	0	0	52	14	0	0	0	2	58	73
2336	6-Nov-21	14:00:00	1	0	1	0	CT	0	0	28	44	0	13	8	1	78	5	0	0	0	17	18	0	0	1	44	45	2	63	18	0	0	53	3	0	0	0	0	9	0	25
2337	6-Nov-21	14:05:00	1	0	1	0	CT	0	0	106	26	0	56	103	0	58	6	46	0	0	53	0	0	71	0	0	41	6	3	27	0	0	72	0	0	0	50	0	71	97	0
2338	6-Nov-21	14:10:00	1	0	1	0	CT	0	0	0	13	0	0	78	3	106	0	76	15	1	23	0	0	62	0	0	33	0	0	23	0	31	93	0	4	0	81	0	76	43	0
2339	6-Nov-21	14:15:00	1	0	1	0	CT	0	0	0	0	0	0	66	59	36	0	0	70	0	11	0	0	47	0	23	0	0	0	24	0	84	40	0	73	53	63	4	28	0	0
2340	6-Nov-21	14:20:00	1	0	1	0	CT	0	0	0	0	0	0	6	26	0	0	0	1	0	0	1	0	10	0	0	0	0	0	0	0	87	68	0	37	116	21	8	44	87	0
2341	6-Nov-21	14:25:00	1	0	1	0	CT	0	0	0	0	0	0	0	0	0	25	0	30	0	0	0	58	0	0	0	14	0	0	0	1	3	48	62	39	124	0	14	2	94	0
2342	6-Nov-21	14:30:00	1	0	1	0	CT	0	0	3	0	0	0	0	0	0	59	0	55	0	0	1	56	0	22	8	71	1	35	0	0	89	59	66	15	102	0	36	50	1	0
2343	6-Nov-21	14:35:00	1	0	1	0	CT	0	0	0	0	0	40	2	0	0	38	0	0	30	0	0	44	47	0	73	31	0	44	0	0	46	31	99	14	88	8	0	45	8	0
2344	6-Nov-21	14:40:00	1	0	1	0	CT	0	0	0	0	0	39	0	68	0	0	0	0	0	0	0	0	72	0	77	40	0	36	39	0	0	6	30	0	66	0	0	38	99	0
2345	6-Nov-21	14:45:00	1	0	1	0	CT	0	0	0	0	0	0	88	59	0	0	0	0	2	0	1	22	68	0	51	31	0	0	33	0	0	0	83	0	0	0	0	16	49	44
2346	6-Nov-21	14:50:00	1	0	1	0	CT	0	0	0	0	0	0	103	17	0	0	0	0	1	0	0	11	0	2	0	20	0	34	0	0	0	0	8	0	0	0	0	0	0	65
2347	6-Nov-21	14:55:00	1	0	1	0	CT	0	0	53	46	0	0	0	0	0	0	36	2	1	0	0	0	7	0	0	0	12	60	0	7	0	0	0	0	0	3	24	36	0	0
2348	6-Nov-21	15:00:00	1	0	1	0	CT	0	0	84	49	0	38	0	0	0	0	30	59	0	0	27	0	19	9	36	0	0	30	0	73	42	0	0	0	0	3	41	26	43	0
2349	6-Nov-21	15:05:00	1	0	1	0	CT	0	0	27	42	54	61	0	51	82	0	0	63	0	0	0	43	22	0	93	0	0	0	34	58	62	68	0	0	0	1	34	0	73	0
2350	6-Nov-21	15:10:00	1	0	1	0	CT	0	0	0	43	100	50	0	51	96	0	0	83	0	39	0	71	93	0	17	58	2	3	17	82	29	46	0	0	9	0	23	41	34	0
2351	6-Nov-21	15:15:00	1	0	1	0	CT	0	0	0	18	51	49	0	16	70	0	8	22	0	56	1	63	44	0	0	45	0	77	25	6	0	41	0	0	87	57	0	37	7	11
2352	6-Nov-21	15:20:00	1	0	1	0	CT	0	0	0	0	0	52	0	57	76	0	0	0	0	4	0	14	0	0	3	35	0	57	0	0	0	1	0	17	63	77	0	1	0	75
2353	6-Nov-21	15:25:00	1	0	1	0	CT	0	0	0	0	0	0	25	33	92	0	0	0	26	0	0	0	0	0	62	1	4	27	0	0	0	0	0	56	122	62	0	44	0	61
2354	6-Nov-21	15:30:00	1	0	1	0	CT	0	0	0	0	0	1	95	13	58	0	0	19	1	10	53	0	53	0	56	0	0	0	0	1	55	0	93	57	54	51	0	26	0	48
2355	6-Nov-21	15:35:00	1	0	1	0	CT	0	0	67	0	0	41	85	0	0	53	64	0	0	37	129	0	77	0	0	12	0	0	3	0	69	0	89	6	71	70	22	0	0	0
2356	6-Nov-21	15:40:00	1	0	1	0	CT	0	0	118	0	0	51	38	0	0	5	66	0	0	31	26	0	37	15	1	63	0	0	64	9	56	0	74	0	73	14	24	2	5	2
2357	6-Nov-21	15:45:00	1	0	1	0	CT	0	0	70	0	65	13	0	20	0	0	31	51	0	35	0	32	0	0	18	42	1	64	28	9	62	3	0	14	0	0	13	11	23	24
2358	6-Nov-21	15:50:00	1	0	1	0	CT	0	0	0	0	75	0	0	44	0	0	2	70	1	33	0	78	0	0	37	42	4	32	35	81	0	0	0	46	0	0	25	9	97	77
2359	6-Nov-21	15:55:00	1	0	1	0	CT	0	0	0	76	39	0	0	14	0	0	23	0	0	1	0	49	0	11	83	25	0	0	16	89	0	0	0	42	0	9	6	19	59	33
2360	6-Nov-21	16:00:00	1	0	1	0	CT	0	0	0	58	0	23	0	0	0	0	109	0	77	0	0	27	0	11	1	3	0	52	10	7	0	70	0	24	0	57	23	42	0	0
2361	6-Nov-21	16:05:00	1	0	1	0	CT	0	0	80	16	0	32	21	0	0	0	94	25	94	0	0	0	0	1	0	51	0	46	0	5	0	74	0	7	0	57	0	44	33	4
2362	6-Nov-21	16:10:00	1	0	1	0	CT	0	0	58	0	0	47	98	20	0	0	49	74	69	0	0	0	53	0	0	51	0	69	0	0	47	25	0	0	0	21	7	24	84	73
2363	6-Nov-21	16:15:00	1	0	1	0	CT	0	0	101	0	0	42	71	0	0	0	0	58	79	36	0	0	68	1	0	43	0	14	0	2	75	0	0	0	0	1	62	38	53	59
2364	6-Nov-21	16:20:00	1	0	1	0	CT	0	0	98	0	14	0	82	0	0	0	0	86	71	0	0	64	46	61	0	5	0	27	23	85	0	0	0	0	96	0	1	7	61	13
2365	6-Nov-21	16:25:00	1	0	1	0	CT	0	0	96	0	109	0	0	0	0	0	0	0	48	0	0	71	45	7	0	33	0	0	30	34	0	21	13	0	123	0	0	39	0	0
2366	6-Nov-21	16:30:00	1	0	1	0	CT	0	0	1	0	96	0	0	47	38	69	0	0	79	19	80	18	0	0	0	56	0	52	13	50	0	69	79	22	73	0	0	32	10	52
2367	6-Nov-21	16:35:00	1	0	1	0	CT	0	0	5	0	39	57	0	42	85	36	0	0	65	25	67	0	0	0	0	30	0	19	3	2	2	35	81	56	0	61	0	13	98	58
2368	6-Nov-21	16:40:00	1	0	1	0	CT	0	0	0	20	0	64	0	7	74	31	0	61	59	58	76	0	0	0	0	8	0	0	17	0	0	45	15	33	0	20	0	7	32	41
2369	6-Nov-21	16:45:00	1	0	1	0	CT	0	0	0	26	0	59	0	0	71	60	0	96	0	1	70	53	0	0	0	22	0	0	0	0	1	2	56	46	0	0	0	13	0	63
2370	6-Nov-21	16:50:00	1	0	1	0	CT	0	0	0	48	8	15	0	63	67	13	11	36	0	0	54	54	0	0	0	2	0	0	0	1	0	5	0	50	2	0	0	31	0	92
2371	6-Nov-21	16:55:00	1	0	1	0	CT	0	0	46	1	90	21	66	0	74	63	94	36	0	0	0	0	0	4	0	41	26	28	0	1	0	9	0	12	0	0	0	35	0	72
2372	6-Nov-21	17:00:00	1	0	1	0	CT	0	0	110	0	66	0	71	0	67	0	96	134	0	0	0	0	83	27	0	11	0	74	0	2	0	59	0	0	0	0	0	0	39	61
2373	6-Nov-21	17:05:00	1	0	1	0	CT	0	0	72	0	44	0	75	0	76	15	73	40	0	0	0	0	75	1	0	0	2	49	0	53	0	2	0	0	4	0	0	21	88	31
2374	6-Nov-21	17:10:00	1	0	1	0	CT	0	0	107	0	23	0	56	45	76	0	0	64	0	0	0	0	74	0	42	0	0	30	0	53	0	0	0	0	114	0	29	32	6	56
2375	6-Nov-21	17:15:00	1	0	1	0	CT	0	0	61	0	9	0	109	49	16	0	0	98	0	0	0	38	40	6	0	0	1	25	0	0	0	0	0	10	69	0	28	7	0	60
2376	6-Nov-21	17:20:00	1	0	1	0	CT	0	0	1	0	0	0	16	11	0	0	0	0	0	0	0	60	0	63	0	0	2	38	1	0	0	0	0	59	56	15	39	21	84	68
2377	6-Nov-21	17:25:00	1	0	1	0	CT	0	0	0	0	0	0	0	0	0	0	0	16	0	0	0	53	0	6	0	0	0	0	0	0	0	0	0	48	0	73	41	28	44	38
2378	6-Nov-21	17:30:00	1	0	1	0	CT	0	0	52	0	0	0	0	0	0	55	0	75	0	0	0	6	4	1	0	0	1	0	0	0	0	0	40	77	0	60	17	0	2	38
2379	6-Nov-21	17:35:00	1	0	1	0	CT	0	0	99	0	0	24	0	0	0	63	0	39	74	0	0	57	8	0	0	0	0	0	0	0	0	0	0	0	0	0	0	0	0	62
2380	6-Nov-21	17:40:00	1	0	1	0	CT	0	0	100	0	0	83	83	0	0	63	0	35	95	0	0	0	94	0	0	16	1	0	1	0	0	0	0	0	0	0	0	0	0	26
2381	6-Nov-21	17:45:00	1	0	1	0	CT	0	0	105	0	0	57	100	0	0	48	0	0	69	10	0	0	31	0	0	0	0	0	0	0	0	0	0	0	0	0	0	0	0	0
2382	6-Nov-21	17:50:00	1	0	1	0	CT	0	0	47	0	0	81	78	0	0	51	0	0	78	33	0	0	0	0	0	0	3	0	0	0	0	0	0	0	0	0	0	0	0	11
2383	6-Nov-21	17:55:00	1	0	1	0	CT	0	0	6	0	0	0	0	0	0	4	10	0	11	50	0	0	0	0	0	0	12	0	0	0	0	0	3	0	0	0	0	0	0	67
2384	6-Nov-21	18:00:00	1	0	1	0	CT	0	0	0	0	0	0	0	0	0	42	91	0	0	5	0	0	0	0	0	0	0	0	0	0	0	0	9	0	0	1	0	0	0	33
2385	6-Nov-21	18:05:00	1	0	1	0	CT	0	0	0	0	0	0	0	12	0	62	0	0	0	0	0	0	0	0	0	0	9	0	0	0	0	0	0	0	0	0	0	0	0	0
2386	6-Nov-21	18:10:00	1	0	1	0	CT	0	0	0	0	0	0	0	95	0	23	0	0	0	0	0	0	0	1	0	0	0	0	0	0	0	0	0	0	0	0	0	0	0	0
2387	6-Nov-21	18:15:00	1	0	1	0	CT	0	0	0	0	0	0	63	41	0	0	0	0	0	0	0	0	0	0	0	0	0	0	0	0	0	0	0	0	0	0	0	2	0	0
2388	6-Nov-21	18:20:00	1	0	1	0	CT	0	0	3	0	0	0	106	61	0	0	0	0	0	0	0	78	0	0	0	0	0	0	0	0	0	0	0	0	0	0	0	47	0	0
2389	6-Nov-21	18:25:00	1	0	1	0	CT	0	0	0	0	0	0	25	18	0	0	0	0	0	0	0	24	69	0	0	0	0	0	1	0	18	0	0	0	0	0	0	69	0	5
2390	6-Nov-21	18:30:00	1	0	1	0	CT	0	0	3	0	0	0	0	0	0	0	0	0	0	0	0	0	75	0	0	0	0	0	0	0	5	0	0	0	0	0	0	0	0	65
2391	6-Nov-21	18:35:00	1	0	1	0	CT	0	0	1	0	0	0	0	0	0	0	0	0	0	0	0	0	16	0	0	0	0	0	0	0	0	0	0	0	0	0	0	0	0	42
2392	6-Nov-21	18:40:00	1	0	1	0	CT	0	0	0	0	0	0	0	0	0	0	0	0	0	0	0	0	17	11	0	0	0	0	0	0	0	0	0	0	0	0	0	0	0	0
2393	6-Nov-21	18:45:00	1	0	1	0	CT	0	0	0	0	0	0	0	0	0	0	0	0	0	0	0	0	0	0	0	0	18	0	1	0	0	0	0	0	0	0	0	0	0	0
2394	6-Nov-21	18:50:00	1	0	1	0	CT	0	0	0	45	0	0	0	0	0	0	0	0	0	0	0	0	0	0	0	0	4	30	0	37	0	0	0	0	0	0	0	0	0	0
2395	6-Nov-21	18:55:00	1	0	1	0	CT	0	0	0	34	0	0	0	0	0	0	0	0	0	0	0	0	0	0	0	0	0	37	0	56	0	0	0	0	0	0	0	0	0	0
2396	6-Nov-21	19:00:00	1	0	1	0	CT	0	0	0	50	0	0	0	0	0	0	0	0	0	0	0	0	0	1	0	0	0	44	0	13	0	0	0	0	0	0	0	0	0	0
2397	6-Nov-21	19:05:00	1	0	1	0	CT	0	0	0	43	0	0	0	0	0	0	0	0	0	0	0	0	0	0	0	0	0	61	0	0	0	0	0	0	0	0	0	0	0	0
2398	6-Nov-21	19:10:00	1	0	1	0	CT	0	0	0	70	2	0	56	0	0	0	0	0	0	0	0	0	0	0	0	0	0	20	0	0	0	0	0	6	0	1	0	35	0	0
2399	6-Nov-21	19:15:00	1	0	1	0	CT	0	0	1	17	0	0	63	0	0	0	0	0	0	0	0	0	0	0	0	0	0	0	0	0	0	0	0	59	0	0	0	9	0	0
2400	6-Nov-21	19:20:00	1	0	1	0	CT	0	0	0	0	0	0	8	0	0	0	0	0	0	0	0	0	0	0	0	0	0	0	0	0	0	0	0	13	0	0	0	0	0	0
2401	6-Nov-21	19:25:00	1	0	1	0	CT	0	0	0	0	0	0	5	0	0	0	0	0	0	0	0	0	0	0	0	0	0	0	0	0	0	0	0	0	0	0	0	0	0	0
2402	6-Nov-21	19:30:00	1	0	1	0	CT	0	0	87	0	0	0	81	0	0	0	0	0	0	0	0	0	0	0	0	0	0	0	0	0	0	0	0	0	0	1	0	0	0	0
2403	6-Nov-21	19:35:00	1	0	1	0	CT	0	0	95	0	0	0	85	0	0	0	0	0	0	0	0	0	7	0	0	0	0	0	0	0	0	0	0	0	0	0	0	0	0	0
2404	6-Nov-21	19:40:00	1	0	1	0	CT	0	0	102	0	0	0	0	0	0	0	0	0	0	0	0	0	0	0	0	0	0	0	39	0	0	0	0	0	0	0	0	0	0	0
2405	6-Nov-21	19:45:00	1	0	1	0	CT	0	0	117	0	0	0	0	0	0	0	0	0	0	0	0	0	0	0	0	0	14	0	0	0	0	0	0	0	0	0	0	0	0	0
2406	6-Nov-21	19:50:00	1	0	1	0	CT	0	0	51	0	0	0	0	0	0	0	0	0	0	0	0	0	0	2	0	0	0	0	0	0	0	0	0	0	0	0	0	0	0	0
2407	6-Nov-21	19:55:00	1	0	1	0	CT	0	0	27	0	0	0	0	0	0	0	0	0	0	0	0	0	0	0	0	0	9	0	0	0	20	0	0	0	0	0	0	0	0	0
2408	6-Nov-21	20:00:00	1	0	1	0	CT	0	0	2	0	47	0	0	0	0	0	0	0	0	0	0	0	0	0	0	0	0	0	3	0	3	0	0	0	0	0	0	0	4	0
2409	6-Nov-21	20:05:00	1	0	1	0	CT	0	0	1	0	0	0	0	0	0	0	0	0	0	0	0	0	0	0	0	0	0	0	6	0	0	0	0	0	0	0	0	0	18	0
2410	6-Nov-21	20:10:00	1	0	1	0	CT	0	0	0	0	0	0	0	0	0	0	0	0	0	0	0	0	0	0	0	0	0	0	0	0	0	0	0	0	0	0	0	0	0	0
2411	6-Nov-21	20:15:00	1	0	1	0	CT	0	1	24	34	25	18	42	2	12	0	0	47	53	21	25	3	29	73	55	9	59	0	14	9	57	18	54	10	63	61	19	0	55	2
2412	6-Nov-21	20:20:00	1	0	1	0	CT	0	1	5	11	21	41	128	0	25	2	0	0	54	5	38	50	20	68	54	10	45	55	46	42	21	30	68	0	93	38	17	19	58	18
2413	6-Nov-21	20:25:00	1	0	1	0	CT	0	1	38	0	0	18	55	0	0	45	0	0	13	0	5	45	28	25	20	3	14	39	32	26	29	0	20	0	79	33	8	4	1	0
2414	6-Nov-21	20:30:00	1	0	1	0	CT	0	1	0	0	0	0	53	0	0	22	0	0	11	22	6	20	0	63	1	0	3	37	5	0	15	2	86	6	41	25	4	15	36	3
2415	6-Nov-21	20:35:00	1	0	1	0	CT	0	1	25	0	0	0	0	67	0	10	0	0	9	28	3	48	50	78	0	0	19	2	25	0	2	0	105	35	69	32	6	21	26	8
2416	6-Nov-21	20:40:00	1	0	1	0	CT	0	1	83	0	0	10	1	44	5	55	0	0	4	42	0	38	68	6	0	0	2	0	17	58	0	22	80	13	59	22	16	17	1	1
2417	6-Nov-21	20:45:00	1	0	1	0	CT	0	1	72	19	92	10	34	40	0	14	16	0	6	0	11	27	43	22	0	0	25	0	4	55	0	63	77	17	68	22	13	9	44	0
2418	6-Nov-21	20:50:00	1	0	1	0	CT	0	1	95	41	72	12	122	67	11	27	1	21	0	0	3	36	7	16	0	12	4	0	9	31	41	36	49	10	60	21	23	2	29	2
2419	6-Nov-21	20:55:00	1	0	1	0	CT	0	1	60	42	83	49	95	24	0	46	0	61	14	41	1	7	54	3	0	10	5	5	0	15	13	18	59	41	75	35	13	11	33	77
2420	6-Nov-21	21:00:00	1	0	1	0	CT	0	1	0	74	26	47	132	21	0	0	27	44	0	49	0	0	43	67	10	11	0	66	0	48	35	0	31	8	40	28	0	27	28	37
2421	6-Nov-21	21:05:00	1	0	1	0	CT	0	1	0	3	0	31	67	25	21	49	11	0	59	0	0	0	24	0	40	11	78	44	0	53	110	0	51	11	26	25	0	48	0	13
2422	6-Nov-21	21:10:00	1	0	1	0	CT	0	1	65	43	0	60	48	0	79	5	0	52	105	0	7	0	21	0	12	19	71	0	0	22	70	0	20	2	71	27	1	49	19	15
2423	6-Nov-21	21:15:00	1	0	1	0	CT	0	1	40	40	29	33	0	1	88	70	0	83	59	1	2	11	1	0	0	16	75	0	9	51	93	11	93	63	56	13	0	30	47	17
2424	6-Nov-21	21:20:00	1	0	1	0	CT	0	1	16	44	75	45	0	36	94	23	74	13	19	88	23	45	11	26	0	8	70	0	56	51	101	78	25	45	83	28	0	13	2	25
2425	6-Nov-21	21:25:00	1	0	1	0	CT	0	1	96	2	40	14	47	2	37	59	0	23	87	67	57	33	70	0	0	11	62	0	72	42	84	77	4	4	39	22	14	0	17	21
2426	6-Nov-21	21:30:00	1	0	1	0	CT	0	1	5	27	0	60	17	11	9	63	0	49	78	14	23	40	14	0	9	11	45	52	1	56	17	9	3	2	83	15	1	34	51	8
2427	6-Nov-21	21:35:00	1	0	1	0	CT	0	1	70	43	0	38	86	0	0	15	60	19	43	0	27	40	0	25	33	17	4	66	31	0	33	15	4	40	29	11	0	29	96	17
2428	6-Nov-21	21:40:00	1	0	1	0	CT	0	1	80	49	0	13	9	0	37	7	17	0	75	0	33	0	0	0	30	9	24	28	51	0	48	4	0	14	29	30	20	38	86	0
2429	6-Nov-21	21:45:00	1	0	1	0	CT	0	1	0	48	21	52	0	28	6	9	0	0	61	46	9	0	62	10	4	7	61	25	8	0	73	15	0	6	15	17	57	47	78	11
2430	6-Nov-21	21:50:00	1	0	1	0	CT	0	1	0	33	97	19	11	11	0	0	0	0	17	34	30	25	58	14	0	4	40	6	21	0	59	14	31	19	19	18	41	28	77	21
2431	6-Nov-21	21:55:00	1	0	1	0	CT	0	1	0	3	37	0	66	0	17	30	0	0	7	16	27	1	2	43	0	10	8	33	52	0	77	14	100	11	21	15	42	26	45	21
2432	6-Nov-21	22:00:00	1	0	1	0	CT	0	1	0	0	0	51	40	13	20	60	0	0	4	0	69	45	0	13	26	15	0	0	42	0	16	13	20	12	78	69	54	19	69	10
2433	6-Nov-21	22:05:00	1	0	1	0	CT	0	1	0	23	0	31	1	28	29	82	0	42	1	41	19	23	49	0	34	5	1	6	21	4	12	12	6	12	11	72	7	1	3	1
2434	6-Nov-21	22:10:00	1	0	1	0	CT	0	1	0	0	18	34	0	10	24	15	46	70	81	38	34	69	81	0	5	14	5	5	0	69	46	9	2	3	26	18	1	0	41	0
2435	6-Nov-21	22:15:00	1	0	1	0	CT	0	1	53	0	0	15	0	0	23	12	95	0	48	0	25	60	29	6	0	10	0	1	0	59	90	1	0	0	93	24	30	5	60	22
2436	6-Nov-21	22:20:00	1	0	1	0	CT	0	1	108	17	0	0	24	0	7	0	14	0	39	0	34	2	0	10	0	10	7	0	0	103	28	4	2	14	122	30	68	37	48	10
2437	6-Nov-21	22:25:00	1	0	1	0	CT	0	1	25	34	0	0	59	15	0	0	0	0	2	0	32	0	69	4	0	6	79	6	53	40	61	6	4	61	85	38	38	36	50	30
2438	6-Nov-21	22:30:00	1	0	1	0	CT	0	1	0	33	0	99	65	20	3	0	0	0	0	27	17	0	74	68	0	11	28	24	35	70	65	13	24	39	103	17	32	6	20	20
2439	6-Nov-21	22:35:00	1	0	1	0	CT	0	1	0	35	0	32	49	0	0	0	0	0	0	24	13	0	1	14	1	13	23	48	23	58	49	18	42	33	77	29	39	14	14	22
[truncated: 16 more rows]
