# Supplementary material for: A Simulated Shift Work Schedule Does Not Increase DNA Double-Strand Break Repair by NHEJ in the Drosophila Rr3 System
Source: Genes (Basel). 2022 Jan 15;13(1):150. doi: 10.3390/genes13010150 (PMC8774994; doi:10.3390/genes13010150)
Supplement: Supplementary file 1 [file genes-13-00150-s001.zip › Table S3.xlsx]

## Sheet: Sheet1
condition	ZT	sample	enrichment	no RT enrichment	lights
12:12	0	1	1.04608	0.993092	dawn
12:12	0	2	0.955945	1.00696	dawn
12:12	4	3	0.665111	0.812252	day
12:12	4	4	0.64992	0.959264	day
12:12	8	5	0.789129	0.920188	day
12:12	8	6	0.727827	0.496546	day
12:12	12	7	1.2156	0.965936	dusk
12:12	12	8	1.05824	0.493116	dusk
12:12	16	9	0.787308	2.26577	night
12:12	16	10	3.20798	0.496546	night
12:12	20	11	1.48281	0.687771	night
12:12	20	12	1.33947	0.864537	night
8:8	0	13	0.86304	1.10191	dawn
8:8	0	14	1.15869	0.907519	dawn
8:8	4	15	1.04066	1.22264	day
8:8	4	16	0.680264	2.11404	day
8:8	8	17	1.72011	0.646176	dusk
8:8	8	18	1.01807	1.53688	dusk
8:8	12	19	1.08736	1.18099	night
8:8	12	20	0.983388	1.25701	night
8:8	16	21	1.38912	1.15669	dawn
8:8	16	22	1.02752	0.68302	dawn
8:8	20	23	0.861049	1.44393	day
8:8	20	24	1.24473	0.779165	day
