# Supplementary material for: A Simulated Shift Work Schedule Does Not Increase DNA Double-Strand Break Repair by NHEJ in the Drosophila Rr3 System
Source: Genes (Basel). 2022 Jan 15;13(1):150. doi: 10.3390/genes13010150 (PMC8774994; doi:10.3390/genes13010150)
Supplement: Supplementary file 1 [file genes-13-00150-s001.zip › Table S4.xlsx]

## Sheet: Sheet1
Maternal	Maternal	Maternal	Maternal	M+Z	M+Z	M+Z	M+Z
NHEJ	NHEJ	SSA	SSA	NHEJ	NHEJ	SSA	SSA
12:12:00	08:08:00	12:12:00	08:08:00	12:12:00	08:08:00	12:12:00	08:08:00
0	0	82.6087	56.4103	0	0	100	81.8182
10.8108	0	80.6452	83.3333	0	7.14286	97.1429	96.7742
5.26316	0	96.3415	71.7391	20	3.84615	97.8723	89.7436
0	0	66.6667	68.254	0	0	100	89.3617
0	100	89.4737	92.8571	8.69565	6.66667	90.9091	93.4783
0	0	100	57.6271	7.69231	25	93.1034	92.6829
0	0	100	100	33.3333	0	90.4762	91.6667
60.8696	0	90	87.013	14.2857	23.0769	89.7436	78.9474
10	0	100	100	0	0	100	80
7.14286	81.0811	100	94.5206	33.3333	0	65.1163	100
0	0	78.4615	100	11.7647	38.2353	94.4444	57.1429
0	0	100	92.9293	4.16667	8.69565	100	100
17.6471	12.5	92.6471	97.2973	2.94118	42.1053	79.2453	69.2308
47.3684	4	100	59.5238	4.7619	0	100	100
50	8.33333	89.7436	75.8621	0	31.8182	93.3333	74.0741
0	0	69.7674	85.7143	0	0	100	100
0	4.34783	100	68.421	10	0	96	100
10	0	100	83.3333	0	50	88	54.8387
0	16.6667	67.8571	75	6.25	22.2222	100	92.3077
0	0	64.7059	68.5185	23.3333	0	70.3704	100
0	61.3636	0		0	0	100	86.6667
0	0			0	20	76.4706	77.7778
0	0			22.2222	0	72	100
3.0303	46.6667			11.1111	9.09091	90.9091	75
0	0			0	0	100	100
11.4286	0			0	5	100	100
0	15.3846			11.1111	50	89.6552	69.5652
0	100			5.26316	0	88	100
10.5263	36.3636			10.5263	0	100	100
0	7.69231			0	0	100	100
4.54545	0			56.5217	2.43902	96.2963	94.8718
3.33333	0			23.0769	0	85	100
9.7561	28.5714			0	5.88235	100	89.1892
0	4.34783			19.0476	23.5294	92.5926	90.4762
8.69565	8.69565			0	8.33333	100	82.0513
0				2.94118	0	94.2857	100
2.5				23.0769	9.375	85.7143	100
3.0303				0	10.7143	96.6667	81.3953
18.5185				21.0526	75	81.4815	34.6154
				11.1111	100	83.871	15
				18.1818	0	91.1111	60
				0	0	100	90.625
				0	9.09091	100	88.8889
				24.2424	10	68.75	86.2745
				6.25	0	97.2222	100
				0	0	92.3077	100
				0		100
				0		100
				8		92.3077
				0		95.6522
				0		100
				6.25		100
				13.3333		90.9091
				0		100
